# Supplementary material
Source: PubMed Central journal article supplement (PMC6558961)

# Supporting Information

## Experimental and Computational Study of the (*Z*)-Selective Formation of Trisubstituted Olefins and Benzo-Fused Oxacycles from the Ruthenium-Catalyzed Dehydrative C–H Coupling of Phenols with Ketones

Hanbin Lee,<sup>†</sup> Manoj V. Mane,<sup>‡</sup> Ho Ryu,<sup>§,‡</sup> Debashis Sahu,<sup>‡</sup> Mu-Hyun Baik,<sup>‡,§,\*</sup> and Chae S. Yi<sup>†,\*</sup>

<sup>†</sup>Department of Chemistry, Marquette University, Milwaukee, Wisconsin 53201-1881 United States

<sup>‡</sup>Center for Catalytic Hydrocarbon Functionalizations, Institute for Basic Science (IBS), Daejeon 34141, Republic of Korea

<sup>§</sup>Department of Chemistry, Korea Advanced Institute of Science and Technology (KAIST), Daejeon 34141, Republic of Korea

### Table of Contents

|                                                                                                                        |     |
|------------------------------------------------------------------------------------------------------------------------|-----|
| 1. General Information                                                                                                 | S2  |
| 2. Experimental Procedure (Table S1)                                                                                   | S2  |
| 3. Deuterium Labeling Study (Figure S1)                                                                                | S4  |
| 4. Deuterium Isotope Effect Study (Figure S2)                                                                          | S5  |
| 5. Carbon Isotope Effect Study (Table S2)                                                                              | S5  |
| 6. X-Ray Crystallographic Determination of ( <i>Z</i> )- <b>2a</b> and <b>12</b> (Figures S3 and S4, Tables S3 and S4) | S6  |
| 7. Characterization Data of the Products                                                                               | S11 |
| 8. Computational Study (Figures S5, S6 and S7, Tables S5 and S6)                                                       | S20 |
| 9. <sup>1</sup> H and <sup>13</sup> C NMR Spectra of the Products                                                      | S93 |

## 1. General Information

All operations were carried out in a nitrogen-filled glove box or by using standard high vacuum and Schlenk techniques unless otherwise noted. Solvents were freshly distilled over appropriate drying reagents. Benzene, toluene, and hexanes were distilled from purple solutions of sodium and benzophenone, and dichloromethane was dried over calcium hydride prior to use. All organic substrates were received from commercial sources and were used without further purification. Column chromatography was performed on Dynamic Absorbents silica gel 60A (32-63  $\mu\text{m}$  particle size), and thin layer chromatography was performed on Agela glass back TLC plates pre-coated with silica gel MF254. The  $^1\text{H}$ ,  $^2\text{H}$ ,  $^{13}\text{C}$ ,  $^{19}\text{F}$  and  $^{31}\text{P}$  NMR spectra were recorded on a Varian 300 or 400 MHz FT-NMR spectrometer, and the data are reported in parts per million (ppm) relative to TMS, with the residual solvent peak as an internal reference. Multiplicities are reported as: s = singlet, d = doublet, t = triplet, q = quartet, m = multiplet, br = broad; coupling constant(s) in Hz. Mass spectra were recorded from Agilent 6850 GC-MS spectrometer with a HP-5 (5% phenylmethylpolysiloxane) column (30 m, 0.32 mm, 0.25  $\mu\text{m}$ ). High resolution mass spectra (HRMS) were obtained at the Mass Spectrometry/ICP Lab, Department of Chemistry and Biochemistry, University of Wisconsin-Milwaukee, Milwaukee, WI. Elemental analyses were performed at the Midwest Microlab, Indianapolis, IN.

## 2. Experimental Procedure

**General Procedure for the Catalytic C-H Coupling Reaction of Phenols with Ketones.** In a glove box, a phenol (0.5 mmol), a ketone (1.0-1.5 mmol), and complex **1** (9 mg, 3 mol %) were dissolved in 1,2-dichloroethane (2 mL) in a 25 mL Schlenk tube equipped with a Teflon stopcock and a magnetic stirring bar. The tube was brought out of the glove box, and was stirred in an oil bath preset at 125-140  $^{\circ}\text{C}$  for 16-72 h. The reaction tube was taken out of the oil bath, and was cooled to room temperature. After the tube was open to air, the solution was filtered through a short silica gel column by eluting with  $\text{CH}_2\text{Cl}_2$  (10 mL), and the filtrate was analyzed by GC-MS. Analytically pure product was isolated by column chromatography on silica gel (230-460 mesh, hexanes/EtOAc). The product was completely characterized by NMR and GC-MS spectroscopic methods.

**Catalyst Screening.** In a glove box, 3,5-dimethoxyphenol (77 mg, 0.5 mmol), cyclohexanone (147 mg, 1.5 mmol), and a catalyst (3 mol % Ru) were dissolved in asolvent (2 mL) in a 25 mL Schlenk tube equipped with a Teflon stopcock and a magnetic stirring bar. The tube was brought out of the glove box, and was stirred in an oil bath at 125  $^{\circ}\text{C}$  for 16 h. The product yield was determined by  $^1\text{H}$  NMR using methylsulfonylmethane as an internal standard. The results are summarized in Table S1.

**Table S1.** Catalyst Screening for the Coupling Reaction of 3,5-Dimethoxyphenol with Cyclohexanone<sup>a</sup>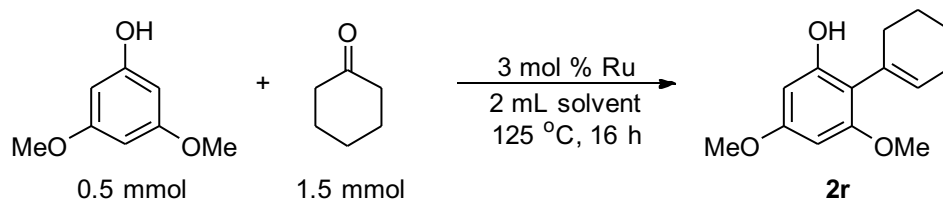

| entry | catalyst                                                | solvent                | yield <sup>b</sup> (%) |
|-------|---------------------------------------------------------|------------------------|------------------------|
| 1     | $[(C_6H_6)(PCy_3)(CO)RuH]^+BF_4^-$ ( <b>1</b> )         | 1,2-DCE                | 92                     |
| 2     | $[(C_6H_6)(PCy_3)(CO)RuH]^+BF_4^-$ ( <b>1</b> )         | chlorobenzene          | 72                     |
| 3     | $[(C_6H_6)(PCy_3)(CO)RuH]^+BF_4^-$ ( <b>1</b> )         | toluene                | 90                     |
| 4     | $[(C_6H_6)(PCy_3)(CO)RuH]^+BF_4^-$ ( <b>1</b> )         | benzene                | 87                     |
| 5     | $[(C_6H_6)(PCy_3)(CO)RuH]^+BF_4^-$ ( <b>1</b> )         | <i>n</i> -hexane       | 55                     |
| 6     | $[(C_6H_6)(PCy_3)(CO)RuH]^+BF_4^-$ ( <b>1</b> )         | 1,4-dioxane            | 24                     |
| 7     | $[(C_6H_6)(PCy_3)(CO)RuH]^+BF_4^-$ ( <b>1</b> )         | <i>t</i> -amyl alcohol | < 3                    |
| 8     | $[(PCy_3)(CO)RuH]_4(\mu-O)(\mu-OH)_2$                   | 1,2-DCE                | 52                     |
| 9     | $[(PCy_3)(CO)RuH]_4(\mu-O)(\mu-OH)_2/HBF_4 \cdot OEt_2$ | 1,2-DCE                | < 3                    |
| 10    | $[RuCl_2(p\text{-cymene})]_2$                           | 1,2-DCE                | 14                     |
| 11    | $[Ru(COD)Cl_2]_n$                                       | 1,2-DCE                | < 3                    |
| 12    | $[(PCy_3)(CH_3CN)(CO)RuH]^+BF_4^-$                      | 1,2-DCE                | < 3                    |
| 13    | $RuCl_2(PPh_3)_3$                                       | 1,2-DCE                | 11                     |
| 14    | $RuHCl(CO)(PCy_3)_2$                                    | 1,2-DCE                | < 3                    |
| 15    | $RuH_2(CO)(PPh_3)_3$                                    | 1,2-DCE                | 18                     |
| 16    | $RuCl_3 \cdot 3H_2O$                                    | 1,2-DCE                | 6                      |
| 17    | $Ru_3(CO)_{12}$                                         | 1,2-DCE                | 15                     |
| 18    | $HBF_4 \cdot OEt_2$                                     | 1,2-DCE                | < 3                    |

<sup>a</sup> Reaction conditions: catalyst (3 mol % Ru), phenol (0.5 mmol), cyclohexanone (1.5 mmol), solvent (2 mL), 125 °C, 16 h. <sup>b</sup> The product yield of **2r** was determined by <sup>1</sup>H NMR using methylsulfonylmethane as an internal standard.

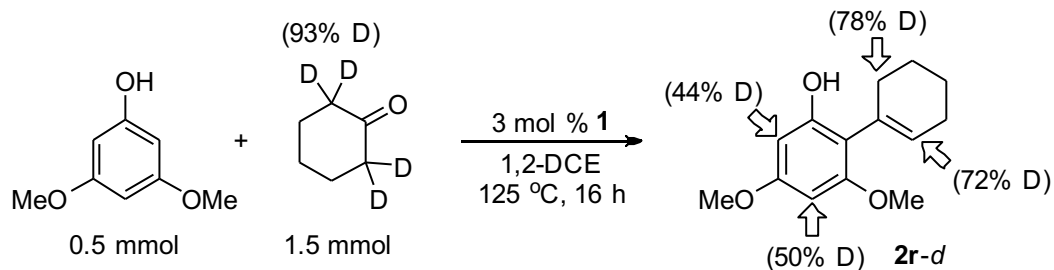

**3. Deuterium Labeling Study.** In a glove box, 3,5-dimethoxyphenol (77 mg, 0.5 mmol), cyclohexanone-2,2,6,6- $d_4$  (93 % D, 1.5 mmol), and complex **1** (3 mol %) were dissolved in 1,2-dichloroethane (2 mL) in a 25 mL Schlenk tube equipped with a Teflon screw cap stopcock and a stirring bar. The tube was brought out of the box, and immersed in an oil bath preset at 125 °C for 16 h. The reaction tube was taken out of the oil bath, and was cooled to room temperature. After the tube was open to air, the solution was filtered through a short silica gel column by eluting with  $\text{CH}_2\text{Cl}_2$  (10 mL), and the filtrate was analyzed by GC-MS. Analytically pure product was isolated by column chromatography on silica gel (230-460 mesh, hexanes/EtOAc = 100:1 to 10:1), and it was completely characterized by  $^1\text{H}$ ,  $^2\text{H}$  NMR and GC-MS spectroscopic methods. The  $^1\text{H}$  and  $^2\text{H}$  NMR spectra of the product **2r-d** are shown in Figure S1.

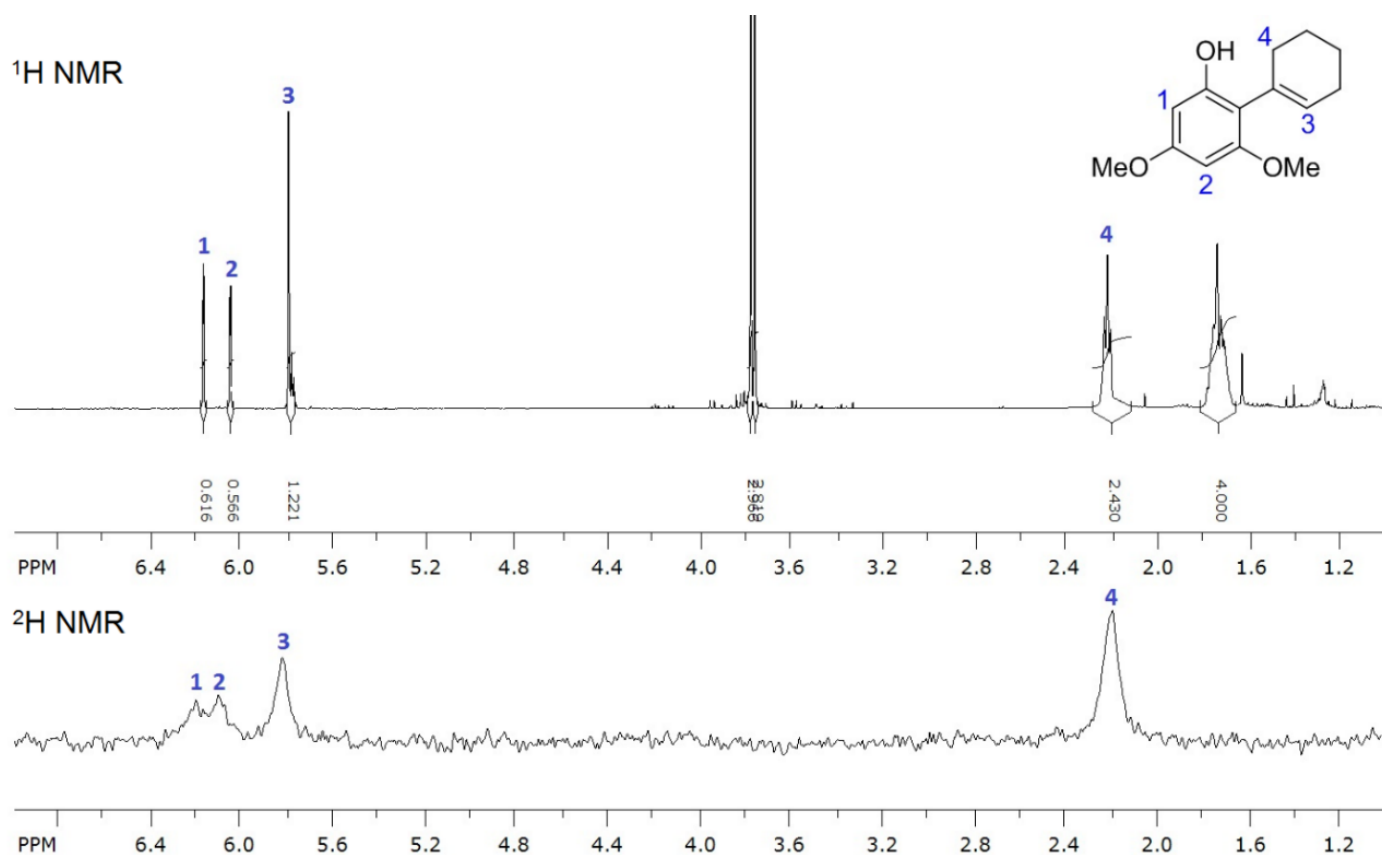

**Figure S1.**  $^1\text{H}$  and  $^2\text{H}$  NMR Spectra of the Product **2r-d** Isolated from the Reaction of 3,5-Methoxyphenol with Cyclohexanone-2,2,6,6- $d_4$ .

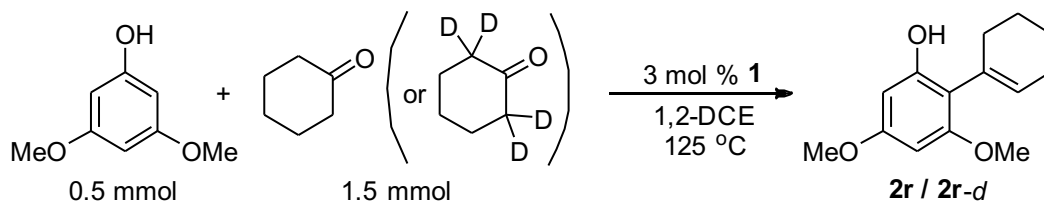

**4. Deuterium Isotope Effect Study.** In a glove box, 3,5-dimethoxyphenol (0.5 mmol), cyclohexanone-2,2,6,6- $d_4$  (1.5 mmol), and complex **1** (9 mg, 3 mol %) were dissolved in 1,2-dichloroethane (2 mL) in a 25 mL Schlenk tube equipped with a Teflon screw cap stopcock and a magnetic stirring bar. The tube was brought out of the box, and immersed in an oil bath preset at 125 °C. The reaction rate was measured by monitoring the appearance of the product signals on  $^1\text{H}$  NMR, which were normalized against the internal standard methylsulfonylmethane in 20-60 min intervals for 300 min of the reaction time. The experiment was repeated by using cyclohexanone. The  $k_{\text{obs}}$  was determined from a first-order plot of  $-\ln[(3,5\text{-dimethoxyphenol})_t/(3,5\text{-dimethoxyphenol})_0]$  vs time (Figure S2).

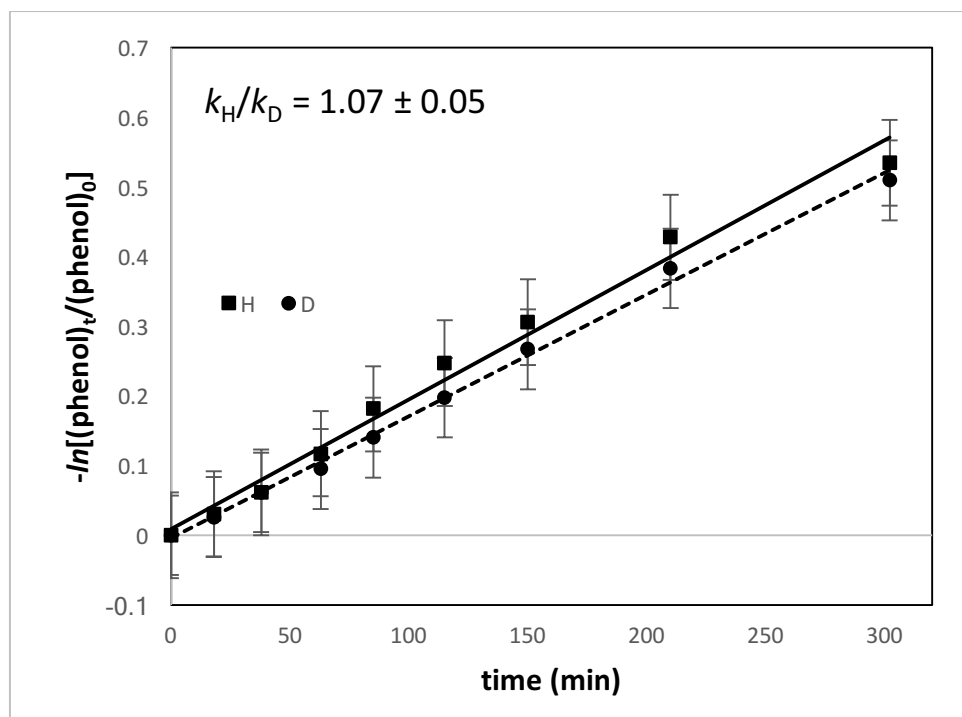

**Figure S2.** The Pseudo-First Order Plots for the Reaction of 3,5-Dimethoxyphenol with Cyclohexanone and with Cyclohexanone-2,2,6,6- $d_4$ .

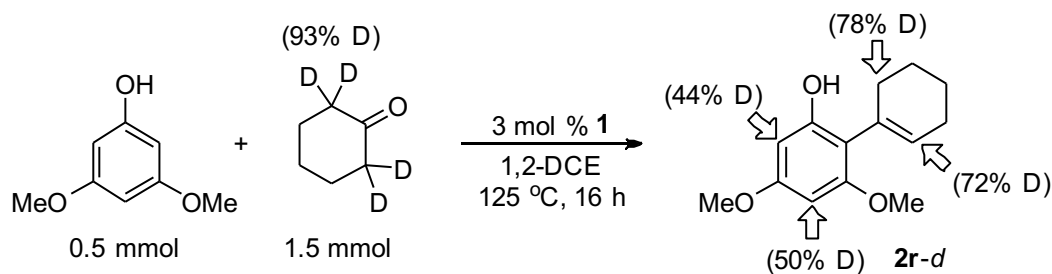

**5. Carbon Isotope Effect Study.** In a glove box, 3,5-dimethoxyphenol (0.5 mmol), propiophenone (1.0 mmol), and complex **1** (9 mg, 3 mol %) were dissolved in 1,2-dichloroethane (2 mL) in a 25 mL Schlenk tube equipped with a Teflon stopcock and a magnetic stirring bar. The tube was brought out of the glove box, and was stirred in an oil bath preset at 125 °C for 16 h (high conversion). After the reaction, conversion was determined by GC-MS and NMR spectroscopy of a small sample of the crude mixture. The analytically pure product (*Z*)-**2a** was isolated by a column chromatography on silica gel. For low conversion samples, the reaction was repeated in three separate Schlenk tubes, each contains 3,5-dimethoxyphenol (1.0 mmol), propiophenone (2.0 mmol), and complex **1** (17 mg, 3 mol %) in 1,2-dichloroethane (3.5 mL). The tubes were stirred in an oil bath at 125 °C for 2 h. After the reaction, tubes were recombined into one reactor, and the conversion of combined sample was determined by GC-MS and NMR spectroscopy. The analytically pure product **2a** was isolated by a column chromatography on silica gel.

The  $^{13}\text{C}\{^1\text{H}\}$  NMR analysis of the isolated product (*Z*)-**2a** was performed by following Singleton's NMR method (ref. 17 in the main text). The sample was prepared identically by dissolving 110 mg of the isolated (*Z*)-**2a** in  $\text{CDCl}_3$  (0.4 mL) in a 5 mm high precision NMR tube. The  $^{13}\text{C}\{^1\text{H}\}$  NMR spectra were recorded with H-decoupling and 45 degree pulses. A 120 s delay between pulses was imposed to minimize T1 variations (d1 = 120, at = 5.0, nt = 512). The data are summarized in Table S2.

**Table S2.** Average  $^{13}\text{C}$  Intergration of the Product (*Z*)-**2a** at High Conversion ( $R_0$ ; avg 96 % conversion of two samples), at Low Conversion (R; avg 19 % conversion of three samples), and the Calculated  $R_0/R$ .

| carbon no. | high conversion, $R_0$ | low conversion, R | $R_0/R$       |
|------------|------------------------|-------------------|---------------|
| 1          | 1.0266                 | 1.0249            | 1.0016        |
| 2          | 1.0017                 | 0.9829            | <b>1.0191</b> |
| 3          | 0.9925                 | 0.9917            | 1.0008        |
| 4 (ref)    | 1.0000                 | 1.0000            | 1.0000        |

## 6. X-Ray Crystallographic Determination of (*Z*)-**2a** and **12**.

For (*Z*)-**2a**: Colorless prisms of (*Z*)-**2a** were grown in  $\text{CH}_2\text{Cl}_2$  at room temperature. A suitable crystal with the dimension of  $0.51 \times 0.5 \times 0.45 \text{ mm}^3$  was selected and mounted on an Oxford SuperNova diffractometer equipped with dual microfocus Cu/Mo X-ray sources, X-ray mirror optics, and Atlas CCD area detector. A total of 16395 reflection data were collected by using  $\text{MoK}\alpha$  ( $\lambda = 0.71073$ ) radiation while the crystal sample was cooled at 100.0 K during the data collection. Using Olex2, the molecular structure was solved with the ShelXS structure solution program by using Direct Methods, and the data was refined with the

XL refinement package using Least Squares minimization. The molecular structure and crystal data of (*Z*)-**2a** are shown in Figure S3 and Table S3, respectively.

For **12**: Colorless flat needles of **12** were grown in CH<sub>2</sub>Cl<sub>2</sub> at room temperature. A suitable crystal with the dimension of 0.58 × 0.24 × 0.10 mm<sup>3</sup> was selected and mounted on an Oxford SuperNova diffractometer equipped with dual microfocus Cu/Mo X-ray sources, X-ray mirror optics, and Atlas CCD area detector. A total of 11890 reflection data were collected by using CuKα (λ = 1.54184) radiation while the crystal sample was cooled at 100.0 K during the data collection. Using Olex2, the molecular structure was solved with the ShelXS structure solution program by using Direct Methods, and the data was refined with the XL refinement package using Least Squares minimization. The molecular structure and crystal data of **12** are shown in Figure S4 and Table S4, respectively.

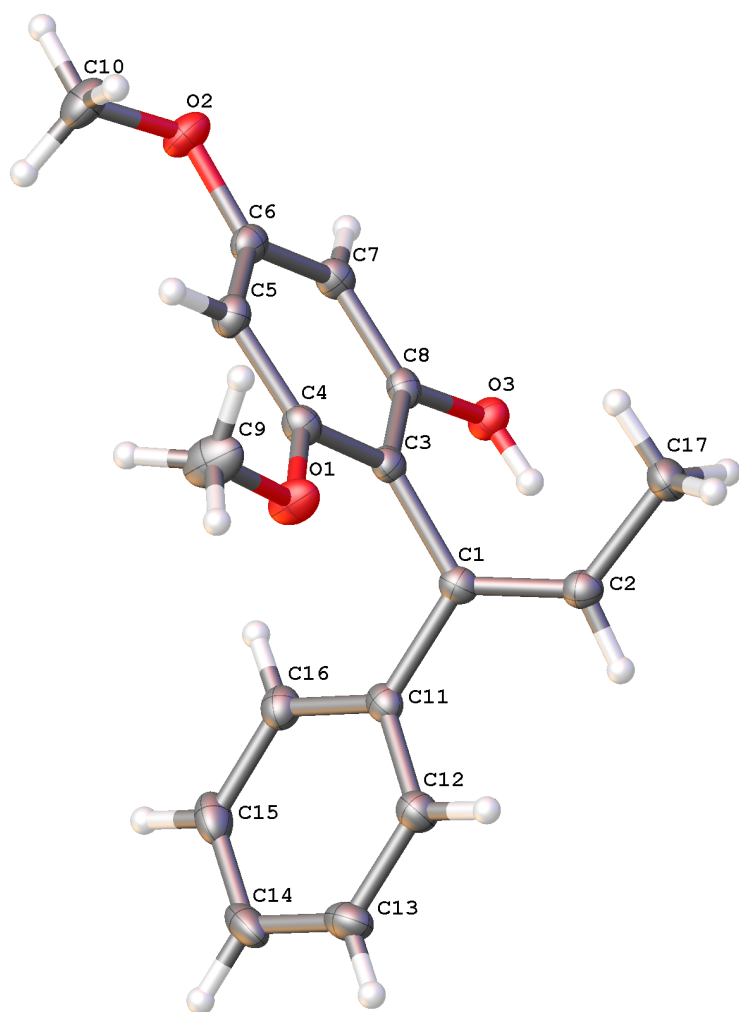

**Figure S3.** Molecular Structure of (*Z*)-**2a**.

**Table S3.** Crystal Data and Structure Refinement for (Z)-2a.

|                                             |                                                               |
|---------------------------------------------|---------------------------------------------------------------|
| Identification code                         | yi3j                                                          |
| Empirical formula                           | C <sub>17</sub> H <sub>18</sub> O <sub>3</sub>                |
| Formula weight                              | 270.31                                                        |
| Temperature/K                               | 100.00(10)                                                    |
| Crystal system                              | monoclinic                                                    |
| Space group                                 | P2 <sub>1</sub> /c                                            |
| a/Å                                         | 9.9036(2)                                                     |
| b/Å                                         | 9.5634(2)                                                     |
| c/Å                                         | 15.2192(4)                                                    |
| α/°                                         | 90.00                                                         |
| β/°                                         | 93.961(2)                                                     |
| γ/°                                         | 90.00                                                         |
| Volume/Å <sup>3</sup>                       | 1438.01(6)                                                    |
| Z                                           | 4                                                             |
| ρ <sub>calc</sub> /g/cm <sup>3</sup>        | 1.249                                                         |
| μ/mm <sup>-1</sup>                          | 0.085                                                         |
| F(000)                                      | 576.0                                                         |
| Crystal size/mm <sup>3</sup>                | 0.51 × 0.5 × 0.45                                             |
| Radiation                                   | MoKα (λ = 0.71073)                                            |
| 2Θ range for data collection/°              | 6.62 to 59.1                                                  |
| Index ranges                                | -13 ≤ h ≤ 13, -12 ≤ k ≤ 13, -20 ≤ l ≤ 20                      |
| Reflections collected                       | 16395                                                         |
| Independent reflections                     | 3669 [R <sub>int</sub> = 0.0346, R <sub>sigma</sub> = 0.0323] |
| Data/restraints/parameters                  | 3669/0/185                                                    |
| Goodness-of-fit on F <sup>2</sup>           | 1.034                                                         |
| Final R indexes [I ≥ 2σ (I)]                | R <sub>1</sub> = 0.0444, wR <sub>2</sub> = 0.1001             |
| Final R indexes [all data]                  | R <sub>1</sub> = 0.0628, wR <sub>2</sub> = 0.1117             |
| Largest diff. peak/hole / e Å <sup>-3</sup> | 0.31/-0.26                                                    |



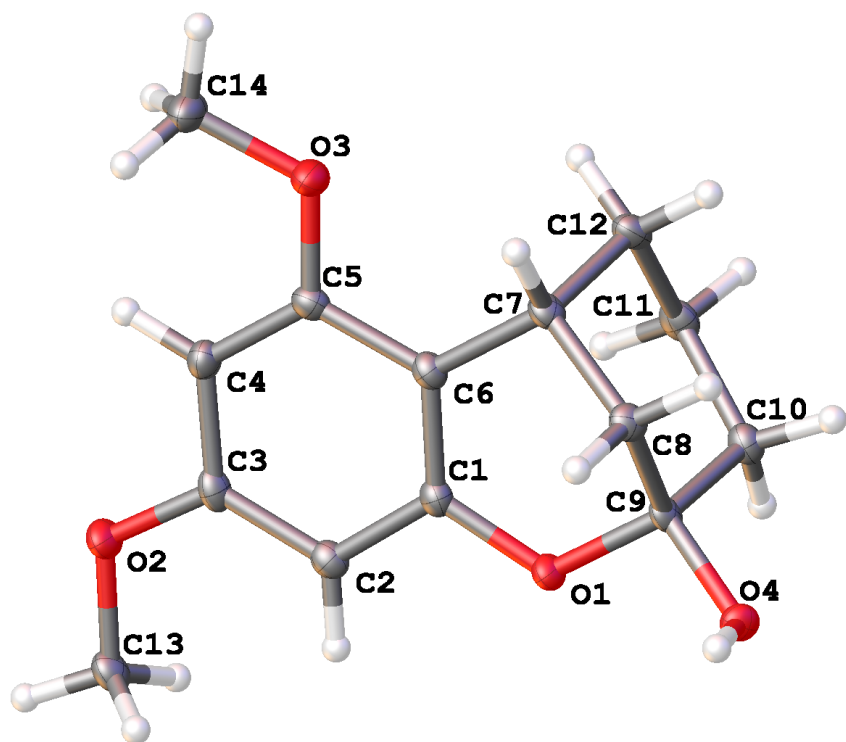

**Figure S4.** Molecular Structure of 12.

**Table S4.** Crystal Data and Structure Refinement for **12**.

|                                             |                                                               |
|---------------------------------------------|---------------------------------------------------------------|
| Identification code                         | yi3i                                                          |
| Empirical formula                           | C <sub>14</sub> H <sub>18</sub> O <sub>4</sub>                |
| Formula weight                              | 250.28                                                        |
| Temperature/K                               | 100.00(10)                                                    |
| Crystal system                              | monoclinic                                                    |
| Space group                                 | P2 <sub>1</sub>                                               |
| a/Å                                         | 5.53828(6)                                                    |
| b/Å                                         | 24.4737(4)                                                    |
| c/Å                                         | 8.98955(14)                                                   |
| α/°                                         | 90.00                                                         |
| β/°                                         | 91.2110(12)                                                   |
| γ/°                                         | 90.00                                                         |
| Volume/Å <sup>3</sup>                       | 1218.19(3)                                                    |
| Z                                           | 4                                                             |
| ρ <sub>calc</sub> /g/cm <sup>3</sup>        | 1.365                                                         |
| μ/mm <sup>-1</sup>                          | 0.816                                                         |
| F(000)                                      | 536.0                                                         |
| Crystal size/mm <sup>3</sup>                | 0.576 × 0.2375 × 0.1009                                       |
| Radiation                                   | CuKα (λ = 1.54184)                                            |
| 2θ range for data collection/°              | 7.22 to 147.84                                                |
| Index ranges                                | -6 ≤ h ≤ 6, -29 ≤ k ≤ 29, -11 ≤ l ≤ 10                        |
| Reflections collected                       | 11890                                                         |
| Independent reflections                     | 4642 [R <sub>int</sub> = 0.0312, R <sub>sigma</sub> = 0.0317] |
| Data/restraints/parameters                  | 4642/1/338                                                    |
| Goodness-of-fit on F <sup>2</sup>           | 1.034                                                         |
| Final R indexes [I ≥ 2σ (I)]                | R <sub>1</sub> = 0.0372, wR <sub>2</sub> = 0.0971             |
| Final R indexes [all data]                  | R <sub>1</sub> = 0.0399, wR <sub>2</sub> = 0.1010             |
| Largest diff. peak/hole / e Å <sup>-3</sup> | 0.19/-0.25                                                    |
| Flack parameter                             | 0.0(5)                                                        |

## 7. Characterization Data of the Products.

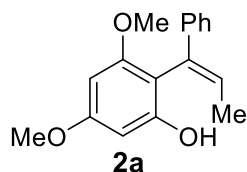

Data for (Z)-**2a**:  $^1\text{H}$  NMR (400 MHz,  $\text{CDCl}_3$ )  $\delta$  7.31-7.19 (m, 5H), 6.56 (q,  $J = 6.9$  Hz, 1H), 6.25 (d,  $J = 2.3$  Hz, 1H), 6.15 (d,  $J = 2.3$  Hz, 1H), 5.22 (s, 1H), 3.83 (s, 3H), 3.63 (s, 3H), 1.72 (d,  $J = 6.9$  Hz, 3H) ppm;  $^{13}\text{C}\{^1\text{H}\}$  NMR (100 MHz,  $\text{CDCl}_3$ )  $\delta$  161.03, 158.51, 154.20, 140.30, 132.97, 128.73, 128.32, 127.14, 125.70, 106.52, 92.27, 91.64, 55.71, 55.27, 15.51 ppm; GC-MS  $m/z = 270$  ( $\text{M}^+$ ); HRMS Calcd for  $\text{C}_{17}\text{H}_{18}\text{O}_3$  ( $[\text{M}+\text{H}]^+$ ): 271.1329, Found: 271.1304.

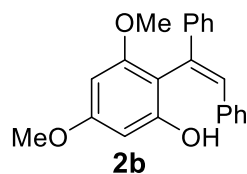

Data for (Z)-**2b**:  $^1\text{H}$  NMR (400 MHz,  $\text{CDCl}_3$ )  $\delta$  7.43-7.39 (m, 2H), 7.36-7.27 (m, 4H), 7.24-7.15 (m, 5H), 6.19 (d,  $J = 2.3$  Hz, 1H), 6.17 (d,  $J = 2.3$  Hz, 1H), 5.27 (s, 1H), 3.83 (s, 3H), 3.57 (s, 3H) ppm;  $^{13}\text{C}\{^1\text{H}\}$  NMR (100 MHz,  $\text{CDCl}_3$ )  $\delta$  161.35, 158.86, 153.81, 141.47, 136.41, 132.76, 131.47, 128.46, 128.33, 128.26, 127.67, 127.65, 126.05, 107.46, 92.77, 92.07, 55.64, 55.17 ppm; GC-MS  $m/z = 332$  ( $\text{M}^+$ ); HRMS Calcd for  $\text{C}_{22}\text{H}_{20}\text{O}_3$  ( $[\text{M}-\text{H}]^-$ ): 331.1340, Found: 331.1343.

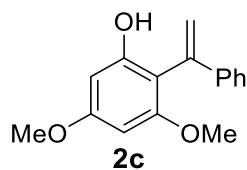

Data for **2c**:  $^1\text{H}$  NMR (400 MHz,  $\text{CDCl}_3$ )  $\delta$  7.39-7.33 (m, 2H), 7.33-7.27 (m, 3H), 6.26 (d,  $J = 2.3$  Hz, 1H), 6.12 (d,  $J = 2.3$  Hz, 1H), 6.08 (d,  $J = 1.4$  Hz, 1H), 5.62 (s, 1H), 5.38 (d,  $J = 1.4$  Hz, 1H), 3.83 (s, 3H), 3.59 (s, 3H) ppm;  $^{13}\text{C}\{^1\text{H}\}$  NMR (100 MHz,  $\text{CDCl}_3$ )  $\delta$  160.97, 158.46, 154.55, 141.38, 139.43, 128.30, 128.06, 126.00, 117.55, 109.12, 92.46, 91.59, 55.70, 55.32 ppm; GC-MS  $m/z = 256$  ( $\text{M}^+$ ); HRMS Calcd for  $\text{C}_{16}\text{H}_{16}\text{O}_3$  ( $[\text{M}-\text{H}]^-$ ): 255.1027, Found: 255.1029.

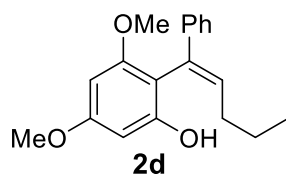

Data for (Z)-**2d**:  $^1\text{H}$  NMR (400 MHz,  $\text{CDCl}_3$ )  $\delta$  7.34-7.20 (m, 5H), 6.51 (t,  $J = 7.3$  Hz, 1H), 6.26 (d,  $J = 2.3$  Hz, 1H), 6.16 (d,  $J = 2.3$  Hz, 1H), 5.26 (s, 1H), 3.83 (s, 3H), 3.64 (s, 3H), 2.07-1.99 (m, 2H), 1.49 (sextet,  $J = 7.4$  Hz, 2H), 0.93 (t,  $J = 7.4$  Hz, 3H) ppm;  $^{13}\text{C}\{^1\text{H}\}$  NMR (100 MHz,  $\text{CDCl}_3$ )  $\delta$  160.91, 158.47, 154.09, 140.19,

134.47, 131.75, 128.29, 127.13, 125.75, 106.95, 92.19, 91.52, 55.58, 55.21, 31.95, 22.35, 13.81 ppm; GC-MS  $m/z = 298$  ( $M^+$ ); HRMS Calcd for  $C_{19}H_{22}O_3$  ( $[M+H]^+$ ): 299.1642, Found: 299.1631.

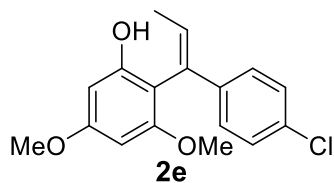

Data for (Z)-**2e**:  $^1H$  NMR (400 MHz,  $CDCl_3$ )  $\delta$  7.23-7.18 (m, 4H), 6.52 (q,  $J = 6.9$  Hz, 1H), 6.23 (d,  $J = 2.3$  Hz, 1H), 6.14 (d,  $J = 2.3$  Hz, 1H), 5.18 (s, 1H), 3.82 (s, 3H), 3.62 (s, 3H), 1.70 (s,  $J = 6.9$  Hz, 3H) ppm;  $^{13}C\{^1H\}$  NMR (100 MHz,  $CDCl_3$ )  $\delta$  161.19, 158.46, 154.16, 138.96, 132.77, 132.13, 129.07, 128.39, 127.00, 106.03, 92.38, 91.70, 55.69, 55.29, 15.53 ppm; GC-MS  $m/z = 304$  ( $M^+$ ); HRMS Calcd for  $C_{17}H_{17}O_3Cl$  ( $[M+H]^+$ ): 305.0939, Found: 305.0937.

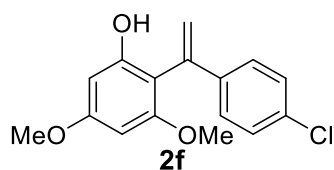

Data for **2f**:  $^1H$  NMR (400 MHz,  $CDCl_3$ )  $\delta$  7.29-7.23 (m, 4H), 6.24 (d,  $J = 2.3$  Hz, 1H), 6.09 (d,  $J = 2.3$  Hz, 1H), 6.03 (d,  $J = 1.3$  Hz, 1H), 5.58 (s, 1H), 5.37 (d,  $J = 1.3$  Hz, 1H), 3.82 (s, 3H), 3.58 (s, 3H) ppm;  $^{13}C\{^1H\}$  NMR (100 MHz,  $CDCl_3$ )  $\delta$  161.15, 158.39, 154.54, 140.51, 138.10, 133.82, 128.43, 127.35, 117.79, 108.59, 92.54, 91.61, 55.68, 55.35 ppm; GC-MS  $m/z = 290$  ( $M^+$ ); HRMS Calcd for  $C_{16}H_{15}O_3Cl$  ( $[M-H]^-$ ): 289.0637, Found: 289.0642.

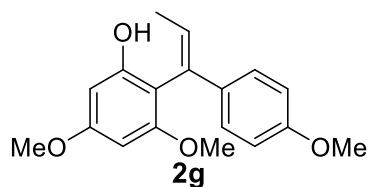

Data for (Z)-**2g**:  $^1H$  NMR (400 MHz,  $CDCl_3$ )  $\delta$  7.24-7.20 (m, 2H), 6.82-6.78 (m, 2H), 6.45 (q,  $J = 6.8$  Hz, 1H), 6.24 (d,  $J = 2.3$  Hz, 1H), 6.15 (d,  $J = 2.3$  Hz, 1H), 5.25 (s, 1H), 3.82 (s, 3H), 3.78 (s, 3H), 3.65 (s, 3H), 1.68 (d,  $J = 6.8$  Hz, 3H) ppm;  $^{13}C\{^1H\}$  NMR (100 MHz,  $CDCl_3$ )  $\delta$  160.94, 158.86, 158.47, 154.16, 132.82, 132.25, 126.80, 126.64, 113.67, 106.69, 92.27, 91.60, 55.72, 55.25, 55.15, 15.38 ppm; GC-MS  $m/z = 300$  ( $M^+$ ); HRMS Calcd for  $C_{18}H_{20}O_4$  ( $[M-H]^-$ ): 299.1289, Found: 299.1294.

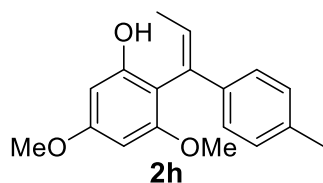

Data for (Z)-**2h**:  $^1H$  NMR (400 MHz,  $CDCl_3$ )  $\delta$  7.21-7.17 (m, 2H), 7.10-7.06 (m, 2H), 6.53 (q,  $J = 6.9$  Hz, 1H), 6.25 (d,  $J = 2.3$  Hz, 1H), 6.16 (d,  $J = 2.3$  Hz, 1H), 5.23 (s, 1H), 3.83 (s, 3H), 3.65 (s, 3H), 2.33 (s, 3H), 1.71 (d,

$J = 6.9$  Hz, 3H) ppm;  $^{13}\text{C}\{^1\text{H}\}$  NMR (100 MHz,  $\text{CDCl}_3$ )  $\delta$  160.93, 158.48, 154.16, 137.36, 136.87, 132.70, 129.04, 127.72, 125.54, 106.63, 92.21, 91.59, 55.71, 55.25, 21.02, 15.42 ppm; GC-MS  $m/z = 284$  ( $\text{M}^+$ ); HRMS Calcd for  $\text{C}_{18}\text{H}_{20}\text{O}_3$  ( $[\text{M}+\text{H}]^+$ ): 285.1485, Found: 285.1478.

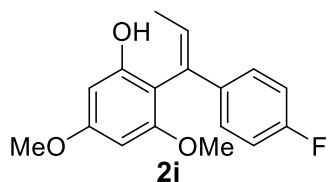

Data for (*Z*)-**2i**:  $^1\text{H}$  NMR (400 MHz,  $\text{CDCl}_3$ )  $\delta$  7.25-7.21 (m, 2H), 6.98-6.91 (m, 2H), 6.47 (q,  $J = 6.8$  Hz, 1H), 6.23 (d,  $J = 2.3$  Hz, 1H), 6.14 (d,  $J = 2.3$  Hz, 1H), 5.18 (s, 1H), 3.82 (s, 3H), 3.63 (s, 3H), 1.69 (d,  $J = 6.8$  Hz, 3H) ppm;  $^{13}\text{C}\{^1\text{H}\}$  NMR (100 MHz,  $\text{CDCl}_3$ )  $\delta$  163.36, 161.16, 160.92, 158.47, 154.14, 136.54, 136.50, 132.13, 128.39, 128.38, 127.32, 127.24, 115.22, 115.00, 106.35, 92.35, 91.72, 55.72, 55.31, 15.49 ppm; GC-MS  $m/z = 288$  ( $\text{M}^+$ ); HRMS Calcd for  $\text{C}_{17}\text{H}_{17}\text{O}_3\text{F}$  ( $[\text{M}+\text{H}]^+$ ): 289.1234, Found: 289.1228.

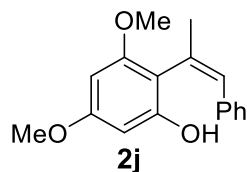

Data for (*Z*)-**2j**:  $^1\text{H}$  NMR (400 MHz,  $\text{CDCl}_3$ )  $\delta$  7.18-7.10 (m, 3H), 7.10-7.05 (m, 2H), 6.76-6.74 (m, 1H), 6.17 (d,  $J = 2.3$  Hz, 1H), 6.09 (d,  $J = 2.3$  Hz, 1H), 5.27 (s, 1H), 3.82 (s, 3H), 3.79 (s, 3H), 2.14 (d,  $J = 1.4$  Hz, 3H) ppm;  $^{13}\text{C}\{^1\text{H}\}$  NMR (100 MHz,  $\text{CDCl}_3$ )  $\delta$  160.78, 158.28, 152.14, 136.23, 131.22, 130.74, 128.28, 127.80, 127.21, 109.06, 92.67, 91.75, 55.71, 55.28, 25.41 ppm; GC-MS  $m/z = 270$  ( $\text{M}^+$ ); HRMS Calcd for  $\text{C}_{17}\text{H}_{18}\text{O}_3$  ( $[\text{M}-\text{H}]^-$ ): 269.1183, Found: 269.1186.

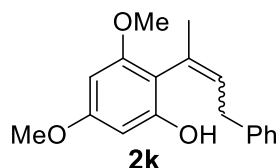

Data for (*Z*)-**2k**:  $^1\text{H}$  NMR (400 MHz,  $\text{CDCl}_3$ )  $\delta$  7.36-7.14 (m, 5H), 6.23 (d,  $J = 2.3$  Hz, 1H), 6.15 (d,  $J = 2.3$  Hz, 1H), 5.98 (ddq,  $J = 7.9, 6.8, 1.4$  Hz, 1H), 5.33 (s, 1H), 3.82 (s, 3H), 3.81 (s, 3H), 3.25 (dd,  $J = 15.1, 7.9$  Hz, 1H), 3.15 (dd,  $J = 15.1, 6.8$  Hz, 1H), 2.00 (d,  $J = 1.4$  Hz, 3H) ppm;  $^{13}\text{C}\{^1\text{H}\}$  NMR (100 MHz,  $\text{CDCl}_3$ )  $\delta$  160.56, 158.04, 152.98, 140.35, 131.38, 129.60, 128.38, 128.36, 125.89, 108.25, 92.13, 91.42, 55.47, 55.26, 35.63, 23.59 ppm. Data for (*E*)-**2k**:  $^1\text{H}$  NMR (400 MHz,  $\text{CDCl}_3$ )  $\delta$  7.36-7.14 (m, 5H), 6.18 (d,  $J = 2.3$  Hz, 1H), 6.10 (d,  $J = 2.3$  Hz, 1H), 5.74 (tq,  $J = 7.4, 1.4$  Hz, 1H), 3.80 (s, 3H), 3.79 (s, 3H), 3.62 (d,  $J = 7.4$  Hz, 2H), 2.06 (d,  $J = 1.4$  Hz, 3H) ppm;  $^{13}\text{C}\{^1\text{H}\}$  NMR (100 MHz,  $\text{CDCl}_3$ )  $\delta$  160.09, 158.09, 153.28, 140.46, 131.24, 130.82, 128.65, 128.16, 126.09, 112.37, 92.21, 91.21, 55.54, 55.25, 34.50, 17.42 ppm; GC-MS  $m/z = 284$  ( $\text{M}^+$ ); HRMS Calcd for  $\text{C}_{18}\text{H}_{20}\text{O}_3$  ( $[\text{M}+\text{H}]^+$ ): 285.1485, Found: 285.1458.

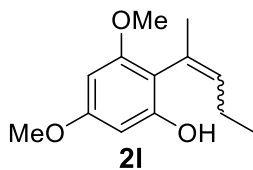

Data for (*Z*)-**2l**:  $^1\text{H}$  NMR (400 MHz,  $\text{CDCl}_3$ )  $\delta$  6.17 (d,  $J = 2.3$  Hz, 1H), 6.09 (d,  $J = 2.3$  Hz, 1H), 5.79 (tq,  $J = 7.2, 1.4$  Hz, 1H), 5.34 (s, 1H), 3.78 (s, 3H), 3.77 (s, 3H), 1.94-1.93 (m, 3H), 1.88-1.79 (m, 2H), 0.92 (t,  $J = 7.5$  Hz, 3H) ppm;  $^{13}\text{C}\{^1\text{H}\}$  NMR (100 MHz,  $\text{CDCl}_3$ )  $\delta$  160.36, 157.96, 152.83, 134.55, 128.11, 108.58, 91.95, 91.34, 55.55, 55.23, 23.46, 22.57, 13.91 ppm. Data for (*E*)-**2l**:  $^1\text{H}$  NMR (400 MHz,  $\text{CDCl}_3$ )  $\delta$  6.17 (d,  $J = 2.3$  Hz, 1H), 6.06 (d,  $J = 2.3$  Hz, 1H), 5.81 (s, 1H), 5.49 (tq,  $J = 7.0, 1.4$  Hz, 1H), 3.78 (s, 3H), 3.76 (s, 3H), 2.29-2.21 (m, 2H), 1.90-1.89 (m, 3H), 1.07 (t,  $J = 7.5$  Hz, 3H) ppm;  $^{13}\text{C}\{^1\text{H}\}$  NMR (100 MHz,  $\text{CDCl}_3$ )  $\delta$  159.96, 158.08, 153.25, 134.52, 129.39, 112.62, 92.12, 91.18, 55.53, 55.25, 21.51, 17.12, 14.09 ppm; GC-MS  $m/z = 222$  ( $\text{M}^+$ ); HRMS Calcd for  $\text{C}_{13}\text{H}_{18}\text{O}_3$  ( $[\text{M}+\text{H}]^+$ ): 223.1329, Found: 223.1323.

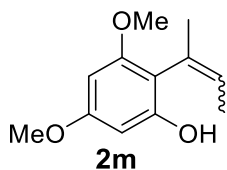

Data for (*Z*)-**2m**:  $^1\text{H}$  NMR (400 MHz,  $\text{CDCl}_3$ )  $\delta$  6.18 (d,  $J = 2.3$  Hz, 1H), 6.10 (d,  $J = 2.3$  Hz, 1H), 5.87 (qq,  $J = 6.7, 1.5$  Hz, 1H), 5.37 (s, 1H), 3.79 (s, 3H), 3.77 (s, 3H), 1.95 (quintet,  $J = 1.5$  Hz, 3H), 1.50 (dq,  $J = 6.7, 1.5$  Hz, 3H) ppm;  $^{13}\text{C}\{^1\text{H}\}$  NMR (100 MHz,  $\text{CDCl}_3$ )  $\delta$  160.40, 157.96, 152.83, 129.89, 126.84, 108.16, 91.96, 91.33, 55.56, 55.20, 23.38, 14.60 ppm. Data for (*E*)-**2m**:  $^1\text{H}$  NMR (400 MHz,  $\text{CDCl}_3$ )  $\delta$  6.17 (d,  $J = 2.3$  Hz, 1H), 6.06 (d,  $J = 2.3$  Hz, 1H), 5.78 (s, 1H), 5.57 (qq,  $J = 6.7, 1.5$  Hz, 1H), 3.77 (s, 3H), 3.76 (s, 3H), 1.91-1.89 (m, 3H), 1.84-1.81 (m, 3H) ppm;  $^{13}\text{C}\{^1\text{H}\}$  NMR (100 MHz,  $\text{CDCl}_3$ )  $\delta$  159.94, 158.00, 153.30, 130.79, 126.75, 112.68, 92.09, 91.09, 55.49, 55.20, 16.96, 13.86 ppm; GC-MS  $m/z = 208$  ( $\text{M}^+$ ); HRMS Calcd for  $\text{C}_{12}\text{H}_{16}\text{O}_3$  ( $[\text{M}+\text{H}]^+$ ): 209.1172, Found: 209.1171.

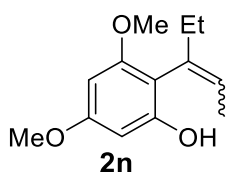

Data for (*Z*)-**2n**:  $^1\text{H}$  NMR (400 MHz,  $\text{CDCl}_3$ )  $\delta$  6.18 (d,  $J = 2.3$  Hz, 1H), 6.10 (d,  $J = 2.3$  Hz, 1H), 5.87 (qt,  $J = 6.7, 1.4$  Hz, 1H), 5.33 (s, 1H), 3.79 (s, 3H), 3.75 (s, 3H), 2.36-2.27 (m, 2H), 1.51 (dt,  $J = 6.7, 1.3$  Hz, 3H), 0.95 (t,  $J = 7.5$  Hz, 3H) ppm;  $^{13}\text{C}\{^1\text{H}\}$  NMR (100 MHz,  $\text{CDCl}_3$ )  $\delta$  160.41, 157.94, 153.46, 136.13, 125.19, 107.25, 91.87, 91.31, 55.51, 55.17, 30.13, 14.43, 12.87 ppm. Data for (*E*)-**2n**:  $^1\text{H}$  NMR (400 MHz,  $\text{CDCl}_3$ )  $\delta$  6.17 (d,  $J = 2.3$  Hz, 1H), 6.05 (d,  $J = 2.3$  Hz, 1H), 5.73 (s, 1H), 5.53 (q,  $J = 6.7$  Hz, 1H), 3.77 (s, 3H), 3.75 (s, 3H), 2.36-2.27 (m, 2H), 1.83 (d,  $J = 6.7$  Hz, 3H), 0.88 (t,  $J = 7.6$  Hz, 3H) ppm;  $^{13}\text{C}\{^1\text{H}\}$  NMR (100 MHz,  $\text{CDCl}_3$ )  $\delta$

160.00, 157.98, 154.17, 137.28, 126.20, 111.05, 92.00, 91.02, 55.44, 55.17, 23.76, 13.51, 12.82 ppm; GC-MS  $m/z = 222$  ( $M^+$ ); HRMS Calcd for  $C_{13}H_{18}O_3$  ( $[M+H]^+$ ): 223.1329, Found: 223.1327.

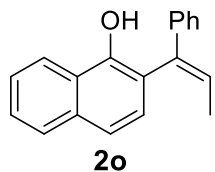

Data for (Z)-**2o**:  $^1H$  NMR (400 MHz,  $CDCl_3$ )  $\delta$  8.32-8.26 (m, 1H), 7.85-7.80 (m, 1H), 7.55-7.49 (m, 2H), 7.44 (d,  $J = 8.4$  Hz, 1H), 7.30-7.24 (m, 5H), 7.10 (d,  $J = 8.4$  Hz, 1H), 6.57 (q,  $J = 7.0$  Hz, 1H), 5.62 (s, 1H), 1.77 (d,  $J = 7.0$  Hz, 3H) ppm;  $^{13}C\{^1H\}$  NMR (100 MHz,  $CDCl_3$ )  $\delta$  148.21, 140.51, 136.93, 134.22, 128.50, 127.80, 127.75, 127.56, 127.47, 126.74, 126.39, 125.32, 123.96, 122.48, 120.04, 118.37, 15.70 ppm; GC-MS  $m/z = 260$  ( $M^+$ ); HRMS Calcd for  $C_{19}H_{16}O$  ( $[M-H]^+$ ): 259.1128, Found: 259.1125.

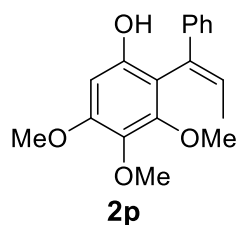

Data for (Z)-**2p**:  $^1H$  NMR (400 MHz,  $CDCl_3$ )  $\delta$  7.29-7.20 (m, 5H), 6.50 (q,  $J = 6.9$  Hz, 1H), 6.40 (s, 1H), 5.10 (s, 1H), 3.87 (s, 3H), 3.79 (s, 3H), 3.49 (s, 3H), 1.74 (d,  $J = 6.9$  Hz, 3H) ppm;  $^{13}C\{^1H\}$  NMR (100 MHz,  $CDCl_3$ )  $\delta$  153.77, 151.46, 148.90, 140.92, 136.03, 133.60, 128.47, 128.34, 127.29, 125.96, 111.27, 94.59, 60.97, 60.50, 55.80, 15.66 ppm; GC-MS  $m/z = 300$  ( $M^+$ ); HRMS Calcd for  $C_{18}H_{20}O_4$  ( $[M-H]^+$ ): 299.1289, Found: 299.1294.

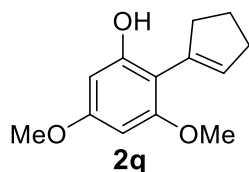

Data for **2q**:  $^1H$  NMR (400 MHz,  $CDCl_3$ )  $\delta$  6.18 (d,  $J = 2.4$  Hz, 1H), 6.05 (d,  $J = 2.4$  Hz, 1H), 5.86 (s, 1H), 5.85-5.82 (m, 1H), 3.78 (s, 3H), 3.76 (s, 3H), 2.67-2.60 (m, 2H), 2.58-2.52 (m, 2H), 2.05-1.96 (m, 2H) ppm;  $^{13}C\{^1H\}$  NMR (100 MHz,  $CDCl_3$ )  $\delta$  160.36, 158.53, 153.85, 138.58, 130.73, 106.14, 92.20, 91.18, 55.52, 55.29, 35.80, 32.92, 23.44 ppm; GC-MS  $m/z = 220$  ( $M^+$ ); HRMS Calcd for  $C_{13}H_{16}O_3$  ( $[M+H]^+$ ): 221.1172, Found: 221.1162.

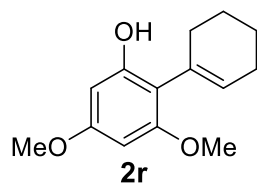

Data for **2r**:  $^1H$  NMR (400 MHz,  $CDCl_3$ )  $\delta$  6.17 (d,  $J = 2.3$  Hz, 1H), 6.05 (d,  $J = 2.3$  Hz, 1H), 5.79 (s, 1H), 5.79-5.76 (m, 1H), 3.77 (s, 3H), 3.76 (s, 3H), 2.26-2.18 (m, 4H), 1.78-1.67 (m, 4H) ppm;  $^{13}C\{^1H\}$  NMR (100

MHz, CDCl<sub>3</sub>)  $\delta$  160.06, 158.13, 153.43, 133.09, 129.31, 111.50, 92.10, 91.18, 55.59, 55.28, 28.81, 25.50, 22.86, 22.02 ppm; GC-MS  $m/z$  = 234 (M<sup>+</sup>); HRMS Calcd for C<sub>14</sub>H<sub>18</sub>O<sub>3</sub> ([M+H]<sup>+</sup>): 235.1329, Found: 235.1311.

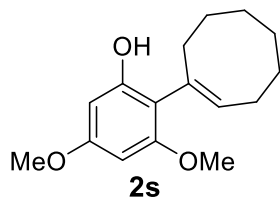

Data for **2s**: <sup>1</sup>H NMR (400 MHz, CDCl<sub>3</sub>)  $\delta$  6.16 (d,  $J$  = 2.3 Hz, 1H), 6.06 (d,  $J$  = 2.3 Hz, 1H), 5.84 (s, 1H), 5.73 (t,  $J$  = 8.1 Hz, 1H), 3.78 (s, 3H), 3.75 (s, 3H), 2.48-2.41 (m, 2H), 2.37-2.29 (m, 2H), 1.70-1.48 (m, 8H) ppm; <sup>13</sup>C{<sup>1</sup>H} NMR (100 MHz, CDCl<sub>3</sub>)  $\delta$  159.95, 158.06, 153.86, 136.28, 132.17, 112.18, 92.10, 91.21, 55.44, 55.27, 30.76, 29.66, 28.86, 26.88, 26.70, 26.52 ppm; GC-MS  $m/z$  = 262 (M<sup>+</sup>); HRMS Calcd for C<sub>16</sub>H<sub>22</sub>O<sub>3</sub> ([M+H]<sup>+</sup>): 263.1642, Found: 263.1631.

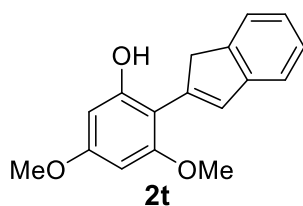

Data for **2t**: <sup>1</sup>H NMR (400 MHz, CDCl<sub>3</sub>)  $\delta$  7.52 (d,  $J$  = 7.4 Hz, 1H), 7.46 (d,  $J$  = 7.4 Hz, 1H), 7.34 (t,  $J$  = 7.4 Hz, 1H), 7.26 (t,  $J$  = 7.4 Hz, 1H), 6.98 (s, 1H), 6.28 (d,  $J$  = 2.4 Hz, 1H), 6.17 (d,  $J$  = 2.4 Hz, 1H), 5.90 (s, 1H), 3.88 (s, 2H), 3.84 (s, 3H), 3.80 (s, 3H) ppm; <sup>13</sup>C{<sup>1</sup>H} NMR (100 MHz, CDCl<sub>3</sub>)  $\delta$  160.79, 158.54, 154.38, 144.24, 144.10, 141.34, 130.93, 126.26, 124.80, 123.46, 120.89, 105.47, 92.62, 91.38, 55.48, 55.30, 42.20 ppm; GC-MS  $m/z$  = 268 (M<sup>+</sup>); HRMS Calcd for C<sub>17</sub>H<sub>16</sub>O<sub>3</sub> ([M-H]<sup>-</sup>): 267.1027, Found: 267.1028.

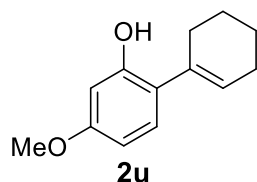

Data for **2u**: <sup>1</sup>H NMR (400 MHz, CDCl<sub>3</sub>)  $\delta$  6.99 (d,  $J$  = 8.4 Hz, 1H), 6.51 (d,  $J$  = 2.5 Hz, 1H), 6.46 (dd,  $J$  = 8.4, 2.5 Hz, 1H), 5.85-5.81 (m, 1H), 5.79 (s, 1H), 3.78 (s, 3H), 2.28-2.17 (m, 4H), 1.82-1.65 (m, 4H) ppm; <sup>13</sup>C{<sup>1</sup>H} NMR (100 MHz, CDCl<sub>3</sub>)  $\delta$  159.46, 152.98, 134.64, 128.44, 127.43, 122.37, 106.17, 100.55, 55.22, 29.96, 25.40, 22.96, 21.86 ppm; GC-MS  $m/z$  = 204 (M<sup>+</sup>); HRMS Calcd for C<sub>13</sub>H<sub>16</sub>O<sub>2</sub> ([M-H]<sup>-</sup>): 203.1078, Found: 203.1065..

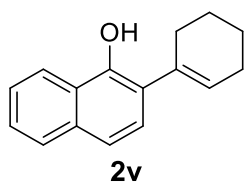

Data for **2v**: <sup>1</sup>H NMR (400 MHz, CDCl<sub>3</sub>)  $\delta$  8.26-8.22 (m, 1H), 7.79-7.74 (m, 1H), 7.50-7.43 (m, 2H), 7.38 (d,  $J$  = 8.5 Hz, 1H), 7.21 (d,  $J$  = 8.5 Hz, 1H), 6.30 (s, 1H), 6.01-5.98 (m, 1H), 2.37-2.24 (m, 4H), 1.88-1.72 (m, 4H)



ppm;  $^{13}\text{C}\{^1\text{H}\}$  NMR (100 MHz,  $\text{CDCl}_3$ )  $\delta$  147.08, 135.33, 133.45, 128.39, 127.33, 126.03, 125.53, 125.23, 123.98, 122.90, 122.53, 119.37, 29.82, 25.49, 23.00, 21.96 ppm; GC-MS  $m/z = 224$  ( $\text{M}^+$ ); HRMS Calcd for  $\text{C}_{16}\text{H}_{16}\text{O}$  ( $[\text{M}-\text{H}]^-$ ): 223.1128, Found: 223.1110.

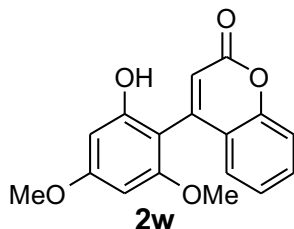

Data for **2w**:  $^1\text{H}$  NMR (400 MHz,  $\text{DMSO}-d_6$ )  $\delta$  9.75 (s, 1H), 7.59 (ddd,  $J = 8.3, 7.3, 1.6$  Hz, 1H), 7.43 (dd,  $J = 8.3, 1.2$  Hz, 1H), 7.25 (ddd,  $J = 7.9, 7.3, 1.2$  Hz, 1H), 7.12 (dd,  $J = 7.9, 1.6$  Hz, 1H), 6.27 (s, 1H), 6.24 (d,  $J = 2.2$  Hz, 1H), 6.21 (d,  $J = 2.2$  Hz, 1H), 3.78 (s, 3H), 3.64 (s, 3H) ppm;  $^{13}\text{C}\{^1\text{H}\}$  NMR (100 MHz,  $\text{DMSO}-d_6$ )  $\delta$  161.67, 160.09, 158.19, 156.06, 153.20, 150.70, 131.73, 126.91, 124.27, 119.70, 117.31, 116.48, 103.04, 93.91, 90.15, 55.70, 55.21 ppm; GC-MS  $m/z = 298$  ( $\text{M}^+$ ); HRMS Calcd for  $\text{C}_{17}\text{H}_{14}\text{O}_5$  ( $[\text{M}+\text{H}]^+$ ): 297.0768, Found: 297.0777.

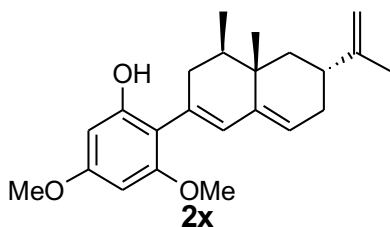

Data for **2x**:  $^1\text{H}$  NMR (400 MHz,  $\text{CDCl}_3$ )  $\delta$  6.17 (d,  $J = 2.3$  Hz, 1H), 6.06 (d,  $J = 2.3$  Hz, 1H), 6.03 (br s, 1H), 5.65 (s, 1H), 5.55-5.51 (m, 1H), 4.79-4.75 (m, 2H), 3.78 (s, 3H), 3.75 (s, 3H), 2.53-2.44 (m, 1H), 2.33-2.14 (m, 3H), 2.06-1.95 (m, 1H), 1.83-1.66 (m, 2H), 1.78 (s, 3H), 1.24 (t,  $J = 12.7$  Hz, 1H), 1.02 (s, 3H), 0.93 (d,  $J = 6.8$  Hz, 3H) ppm;  $^{13}\text{C}\{^1\text{H}\}$  NMR (100 MHz,  $\text{CDCl}_3$ )  $\delta$  160.23, 158.44, 153.50, 150.08, 141.45, 130.88, 130.16, 124.81, 110.58, 108.74, 92.19, 91.28, 55.63, 55.29, 39.96, 38.99, 37.21, 35.73, 35.56, 31.21, 20.67, 17.65, 14.57 ppm; GC-MS  $m/z = 354$  ( $\text{M}^+$ ); HRMS Calcd for  $\text{C}_{23}\text{H}_{30}\text{O}_3$  ( $[\text{M}+\text{H}]^+$ ): 355.2268, Found: 355.2237.

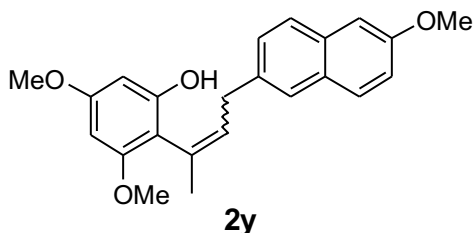

Data for (*Z*)-**2y**:  $^1\text{H}$  NMR (400 MHz,  $\text{CDCl}_3$ )  $\delta$  7.74-7.63 (m, 2H), 7.52 (s, 1H), 7.27-7.23 (m, 1H), 7.18-7.10 (m, 2H), 6.25 (d,  $J = 2.3$  Hz, 1H), 6.16 (d,  $J = 2.3$  Hz, 1H), 6.07-6.02 (m, 1H), 5.38 (s, 1H), 3.92 (s, 3H), 3.82 (s, 3H), 3.82 (s, 3H), 3.36 (dd,  $J = 15.1, 8.0$  Hz, 1H), 3.26 (dd,  $J = 15.1, 6.7$  Hz, 1H), 2.02 (d,  $J = 1.3$  Hz, 3H) ppm;  $^{13}\text{C}\{^1\text{H}\}$  NMR (100 MHz,  $\text{CDCl}_3$ )  $\delta$  160.59, 158.07, 157.09, 153.03, 135.50, 132.97, 131.41, 129.70, 129.04, 128.89, 127.75, 126.77, 126.23, 118.60, 108.32, 105.51, 92.17, 91.43, 55.49, 55.28, 55.19, 35.54, 23.64

ppm. Data for (*E*)-**2y**:  $^1\text{H}$  NMR (400 MHz,  $\text{CDCl}_3$ )  $\delta$  7.74-7.63 (m, 3H), 7.37 (dd,  $J = 8.3, 1.7$  Hz, 1H), 7.18-7.10 (m, 2H), 6.18 (d,  $J = 2.3$  Hz, 1H), 6.10 (d,  $J = 2.3$  Hz, 1H), 5.84-5.78 (m, 1H), 5.74 (s, 1H), 3.93 (s, 3H), 3.82 (s, 3H), 3.79 (s, 3H), 3.73 (d,  $J = 7.4$  Hz, 2H), 2.10-2.08 (m, 3H) ppm;  $^{13}\text{C}\{^1\text{H}\}$  NMR (100 MHz,  $\text{CDCl}_3$ )  $\delta$  160.11, 158.11, 157.21, 153.31, 133.05, 131.29, 130.93, 129.11, 127.35, 127.18, 126.13, 118.80, 112.42, 105.56, 92.23, 91.22, 55.57, 55.26, 55.22, 34.43, 17.49 ppm (two carbon signals obscured or overlapping); GC-MS  $m/z = 364$  ( $\text{M}^+$ ); HRMS Calcd for  $\text{C}_{23}\text{H}_{24}\text{O}_4$  ( $[\text{M}+\text{H}]^+$ ): 365.1747, Found: 365.1741.

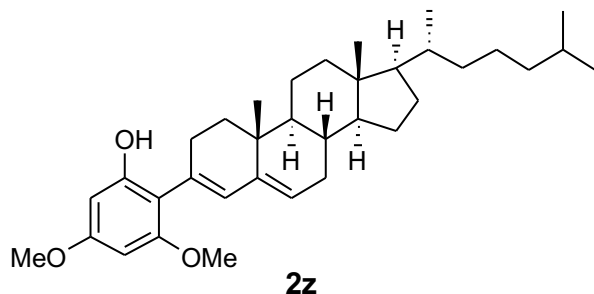

Data for **2z**:  $^1\text{H}$  NMR (400 MHz,  $\text{CDCl}_3$ )  $\delta$  6.17 (d,  $J = 2.3$  Hz, 1H), 6.05 (d,  $J = 2.3$  Hz, 1H), 5.99 (br s, 1H), 5.66 (s, 1H), 5.50-5.46 (m, 1H), 3.78 (s, 3H), 3.74 (s, 3H), 2.46-2.14 (m, 2H), 2.08-2.01 (m, 1H), 1.93-1.79 (m, 2H), 1.75-1.25 (m, 12H), 1.24-0.97 (m, 9H), 1.05 (s, 3H), 0.93 (d,  $J = 6.5$  Hz, 3H), 0.87 (d,  $J = 6.6$  Hz, 6H), 0.72 (s, 3H) ppm;  $^{13}\text{C}\{^1\text{H}\}$  NMR (100 MHz,  $\text{CDCl}_3$ )  $\delta$  160.23, 158.53, 153.58, 140.96, 130.55, 130.07, 125.39, 110.87, 92.21, 91.32, 56.93, 56.11, 55.65, 55.32, 48.26, 42.46, 39.76, 39.50, 36.17, 35.78, 34.68, 34.07, 31.92, 31.80, 28.23, 28.01, 26.58, 24.17, 23.80, 22.82, 22.56, 21.06, 19.18, 18.70, 12.00 ppm; GC-MS  $m/z = 520$  ( $\text{M}^+$ ); HRMS Calcd for  $\text{C}_{35}\text{H}_{52}\text{O}_3$  ( $[\text{M}+\text{H}]^+$ ): 521.3989, Found: 521.3950.

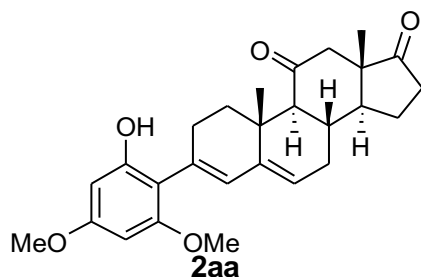

Data for **2aa**:  $^1\text{H}$  NMR (400 MHz,  $\text{CDCl}_3$ )  $\delta$  6.15 (d,  $J = 2.3$  Hz, 1H), 6.04 (d,  $J = 2.3$  Hz, 1H), 5.96 (br s, 1H), 5.61 (s, 1H), 5.47-5.42 (m, 1H), 3.76 (s, 3H), 3.73 (s, 3H), 2.68-2.42 (m, 5H), 2.38-1.89 (m, 8H), 1.76-1.64 (m, 1H), 1.31-1.22 (m, 1H), 1.25 (s, 3H), 0.88 (s, 3H) ppm;  $^{13}\text{C}\{^1\text{H}\}$  NMR (100 MHz,  $\text{CDCl}_3$ )  $\delta$  217.55, 208.76, 160.37, 158.49, 153.46, 141.57, 132.20, 129.45, 122.41, 110.49, 92.29, 91.34, 59.34, 55.66, 55.33, 50.50, 50.48, 50.22, 36.16, 34.96, 33.05, 32.63, 31.50, 26.47, 21.70, 18.76, 14.74 ppm; GC-MS  $m/z = 436$  ( $\text{M}^+$ ); HRMS Calcd for  $\text{C}_{27}\text{H}_{32}\text{O}_5$  ( $[\text{M}+\text{H}]^+$ ): 437.2323, Found: 437.2309.

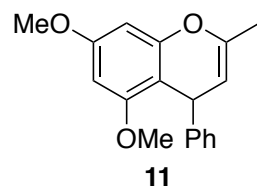

Data for **11**:  $^1\text{H}$  NMR (400 MHz,  $\text{CDCl}_3$ )  $\delta$  7.33-7.23 (m, 4H), 7.21-7.17 (m, 1H), 6.24 (d,  $J = 2.4$  Hz, 1H), 6.14 (d,  $J = 2.4$  Hz, 1H), 4.90 (d,  $J = 4.8$  Hz, 1H), 4.63 (d,  $J = 4.8$  Hz, 1H), 3.81 (s, 3H), 3.61 (s, 3H), 1.97 (s, 3H) ppm;  $^{13}\text{C}\{^1\text{H}\}$  NMR (100 MHz,  $\text{CDCl}_3$ )  $\delta$  159.62, 158.26, 152.70, 147.35, 146.20, 127.99, 127.62, 125.73, 105.10, 101.79, 93.88, 92.61, 55.33, 55.22, 36.27, 19.12 ppm; GC-MS  $m/z = 282$  ( $\text{M}^+$ ); HRMS Calcd for  $\text{C}_{18}\text{H}_{18}\text{O}_3$  ( $[\text{M}+\text{H}]^+$ ): 283.1329, Found: 283.1349.

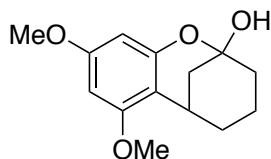

**12**

Data for **12**:  $^1\text{H}$  NMR (400 MHz,  $\text{CDCl}_3$ )  $\delta$  6.02 (d,  $J = 2.3$  Hz, 1H), 6.00 (d,  $J = 2.3$  Hz, 1H), 3.74 (s, 3H), 3.72 (s, 3H), 3.71-3.68 (br s, 1H), 3.43-3.38 (m, 1H), 2.09-2.01 (m, 1H), 1.96 (dd,  $J = 12.4, 2.9$  Hz, 1H), 1.87-1.80 (m, 1H), 1.77-1.63 (m, 2H), 1.59-1.45 (m, 2H), 1.44-1.29 (m, 1H) ppm;  $^{13}\text{C}\{^1\text{H}\}$  NMR (100 MHz,  $\text{CDCl}_3$ )  $\delta$  159.43, 156.90, 156.67, 106.08, 98.64, 92.12, 90.74, 55.24, 55.10, 38.69, 36.36, 29.51, 28.10, 19.13 ppm; GC-MS  $m/z = 250$  ( $\text{M}^+$ ); HRMS Calcd for  $\text{C}_{14}\text{H}_{18}\text{O}_4$  ( $[\text{M}+\text{H}]^+$ ): 251.1278, Found: 251.1271.

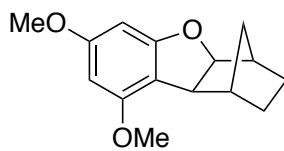

**13**

Data for **13**:  $^1\text{H}$  NMR (400 MHz,  $\text{CDCl}_3$ )  $\delta$  6.06 (d,  $J = 2.0$  Hz, 1H), 6.03 (d,  $J = 2.0$  Hz, 1H), 4.43-4.39 (m, 1H), 3.78 (s, 3H), 3.76 (s, 3H), 2.38-2.25 (m, 2H), 1.93-1.90 (m, 2H), 1.81-1.69 (m, 1H), 1.60-1.54 (m, 1H), 1.48-1.41 (m, 1H), 1.35-1.24 (m, 2H) ppm;  $^{13}\text{C}\{^1\text{H}\}$  NMR (100 MHz,  $\text{CDCl}_3$ )  $\delta$  162.84, 161.49, 157.40, 109.13, 94.09, 91.25, 89.24, 56.53, 55.44, 55.20, 41.83, 38.96, 37.49, 27.85, 27.37 ppm; GC-MS  $m/z = 246$  ( $\text{M}^+$ ); HRMS Calcd for  $\text{C}_{15}\text{H}_{18}\text{O}_3$  ( $[\text{M}+\text{H}]^+$ ): 247.1329, Found: 247.1328.

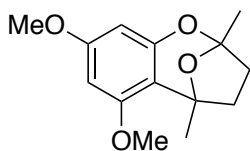

**14**

Data for **14**:  $^1\text{H}$  NMR (400 MHz,  $\text{CDCl}_3$ )  $\delta$  6.00 (d,  $J = 2.4$  Hz, 1H), 5.96 (d,  $J = 2.4$  Hz, 1H), 3.73 (s, 3H), 3.72 (s, 3H), 2.35-2.21 (m, 2H), 2.10-2.01 (m, 1H), 1.95-1.85 (m, 1H), 1.81 (s, 3H), 1.67 (s, 3H) ppm;  $^{13}\text{C}\{^1\text{H}\}$  NMR (100 MHz,  $\text{CDCl}_3$ )  $\delta$  159.91, 156.62, 153.24, 110.33, 106.81, 93.10, 91.51, 83.21, 55.14, 55.05, 42.74, 38.37, 24.10, 23.10 ppm; GC-MS  $m/z = 250$  ( $\text{M}^+$ ); HRMS Calcd for  $\text{C}_{14}\text{H}_{18}\text{O}_4$  ( $[\text{M}+\text{H}]^+$ ): 251.1278, Found: 251.1274.

## 8. Computational Study

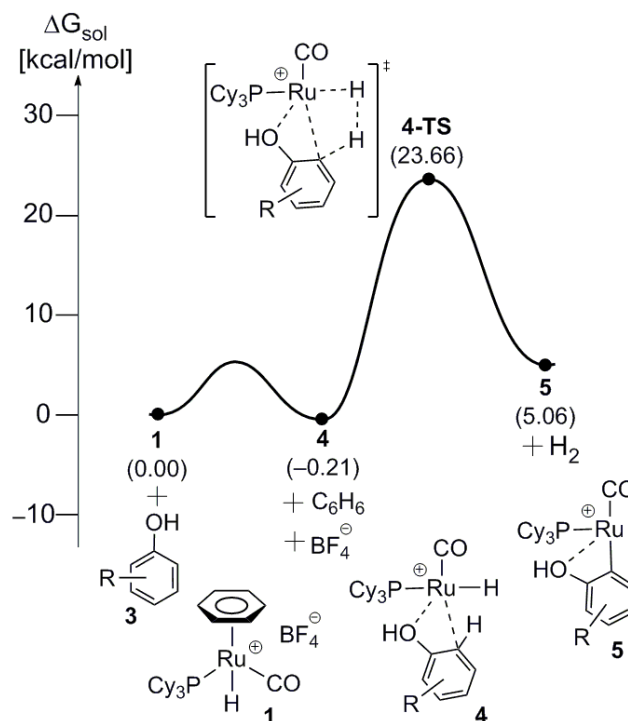

**Figure S5:** The free energy profile for the formation of the active catalyst **5**.

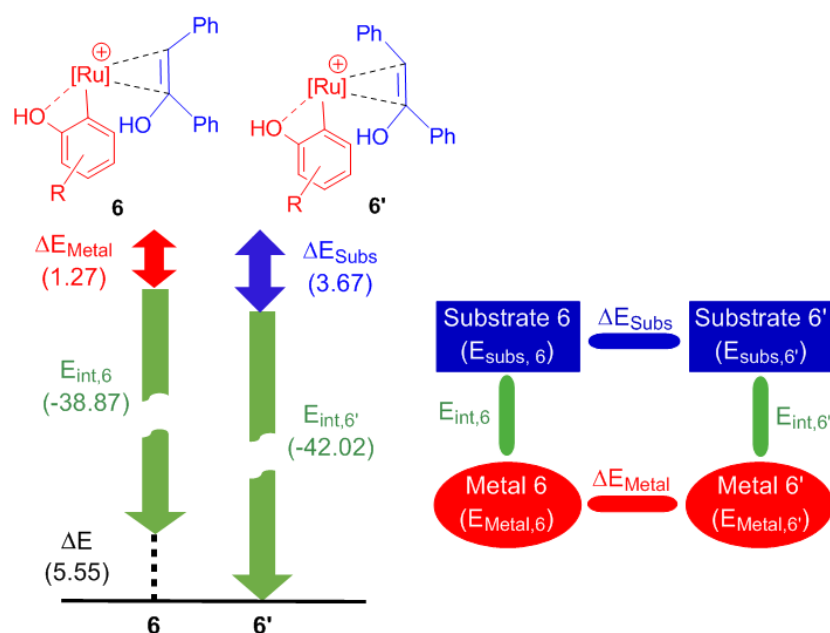

**Figure S6.** Graph of interaction energies for intermediates **6** and **6'**. The energy for structural changes and the metal-substrate interactions are indicated by bidirectional and unidirectional arrows, respectively. Dotted lines represent the difference between the two intermediates. Red, metal fragment; blue, substrate fragment; green, the interaction between the two fragments.

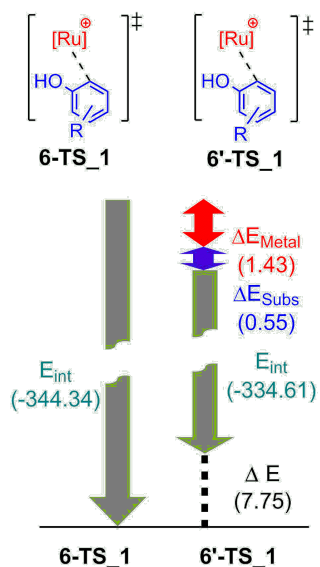

**Figure S7.** The metal fragment interaction energies for the transition states **6-TS** and **6'-TS**.

**Table S5.** Computed Energy Components for Optimized Structures.

|              | E(SCF)/(eV)          | ZPE/(kcal/mol)  | S(gas)/(cal/mol) | G(solv)/(kcal/mol) |
|--------------|----------------------|-----------------|------------------|--------------------|
|              | cc-pVTZ(-f)/LACV3P** | 6-31G**/LACVP** | 6-31G**/LACVP**  | 6-31G**/LACVP**    |
| <b>1</b>     | -52039.055           | 392.05          | 212.940          | -17.98             |
| <b>3</b>     | -14604.767           | 106.75          | 99.934           | -10.05             |
| <b>4</b>     | -48761.843           | 424.46          | 214.865          | -37.87             |
| <b>4-TS</b>  | -48760.581           | 420.48          | 222.168          | -36.95             |
| <b>5</b>     | -48728.556           | 412.42          | 214.092          | -45.06             |
| <b>5-TS</b>  | -65495.831           | 551.48          | 270.990          | -36.46             |
| <b>6</b>     | -65496.025           | 551.68          | 277.161          | -36.15             |
| <b>6-TS</b>  | -65494.840           | 551.04          | 272.598          | -39.61             |
| <b>7</b>     | -65494.990           | 552.20          | 270.607          | -42.42             |
| <b>7-TS</b>  | -65494.950           | 552.31          | 272.755          | -40.46             |
| <b>8</b>     | -65495.937           | 553.54          | 269.539          | -38.52             |
| <b>8-TS</b>  | -65495.023           | 551.64          | 272.955          | -39.76             |
| <b>9</b>     | -65496.218           | 552.15          | 270.304          | -36.15             |
| <b>10</b>    | -50809.714           | 428.95          | 219.086          | -43.23             |
| <b>10-TS</b> | -50808.783           | 426.17          | 221.519          | -46.14             |
| <b>2b</b>    | -29290.580           | 229.49          | 161.172          | -12.51             |

|               |            |        |         |        |
|---------------|------------|--------|---------|--------|
| <b>10</b>     | -80101.353 | 661.87 | 318.343 | -38.54 |
| <b>10-TS</b>  | -80100.176 | 657.30 | 323.358 | -40.35 |
| <b>11</b>     | -80101.704 | 660.48 | 323.718 | -39.02 |
| <b>5'-TS</b>  | -65495.824 | 550.74 | 276.236 | -39.08 |
| <b>6'</b>     | -65496.266 | 552.14 | 274.352 | -39.07 |
| <b>6'-TS</b>  | -65494.663 | 550.65 | 273.63  | -39.83 |
| <b>7'</b>     | -65495.014 | 552.13 | 268.896 | -40.72 |
| <b>7'-TS</b>  | -65494.790 | 551.13 | 278.866 | -38.66 |
| <b>8'</b>     | -65495.798 | 552.94 | 269.528 | -39.89 |
| <b>8'-TS</b>  | -65495.121 | 551.53 | 269.548 | -40.40 |
| <b>9'</b>     | -65495.976 | 552.94 | 269.528 | -39.89 |
| <b>2b'</b>    | -29290.455 | 229.30 | 161.902 | -12.87 |
| <b>10'</b>    | -80101.110 | 659.96 | 319.601 | -39.99 |
| <b>10'-TS</b> | -80099.894 | 656.64 | 323.603 | -42.79 |
| <b>11'</b>    | -80101.498 | 659.68 | 328.522 | -42.79 |
| <b>Ketone</b> | -16766.273 | 137.22 | 107.198 | -7.12  |
| <b>Z-enol</b> | -16766.198 | 138.24 | 110.374 | -7.77  |
| <b>E-enol</b> | -16766.092 | 138.12 | 110.229 | -7.69  |

**Table S6.** Cartesian Coordinates of the Optimized Geometries.

1

```

=====
Ru  4.332017714  4.068157256  11.718217029
H   2.831323655  4.316104266  11.328771999
P   4.411073498  6.403507685  11.724025871
O   4.794142871  4.188450767  8.744302552
C   5.645699220  2.043607433  12.235727223
C   6.176562687  2.984169040  13.146651284
H   7.237083445  3.211355329  13.120013241
C   5.299780035  3.679575605  13.999256073
H   5.695150926  4.444966195  14.658622071
C   3.910379950  3.396879819  14.006556701
H   3.242677706  3.934974301  14.669741329
C   3.399973301  2.395929477  13.146214801
H   2.339346269  2.169189730  13.148304937
C   4.264673139  1.722987767  12.254102414
H   3.868043942  0.979436730  11.571653914
C   4.654193196  4.145304361  9.889963486
C   6.127997027  7.138255686  11.567459960
H   6.008229509  8.203219283  11.811513107
C   6.712756900  7.039605361  10.140665015
H   6.049443929  7.516661304  9.409939947
H   6.825764143  5.986380159  9.871611181

```

|   |              |              |              |
|---|--------------|--------------|--------------|
| C | 8.093779930  | 7.718725787  | 10.085652412 |
| H | 8.494440561  | 7.632728659  | 9.068819522  |
| H | 7.976136575  | 8.794542851  | 10.290249128 |
| C | 9.068583189  | 7.099417116  | 11.096756658 |
| H | 10.027425899 | 7.631553180  | 11.067178802 |
| H | 9.272385541  | 6.060698817  | 10.819362565 |
| C | 8.491099377  | 7.145264904  | 12.519619202 |
| H | 8.432028408  | 8.189410911  | 12.863955191 |
| H | 9.154600833  | 6.609949151  | 13.206902065 |
| C | 7.096424146  | 6.500138472  | 12.584352953 |
| H | 7.210863332  | 5.444808362  | 12.340409220 |
| H | 6.697728511  | 6.578304267  | 13.605648003 |
| C | 3.783816995  | 6.984828574  | 13.400293041 |
| H | 4.287233288  | 6.281391733  | 14.075559643 |
| C | 4.182401576  | 8.400678101  | 13.869188722 |
| H | 5.262516759  | 8.550300154  | 13.782038394 |
| H | 3.702491354  | 9.156891815  | 13.238002845 |
| C | 3.753717767  | 8.609087236  | 15.334142757 |
| H | 4.323106538  | 7.917544570  | 15.972259452 |
| H | 4.021240912  | 9.622034724  | 15.656563306 |
| C | 2.250816736  | 8.361459623  | 15.534227706 |
| H | 1.982753488  | 8.479514723  | 16.590580932 |
| H | 1.682875292  | 9.121275854  | 14.978361493 |
| C | 1.843802867  | 6.968610203  | 15.029877162 |
| H | 0.761772408  | 6.822697716  | 15.131190818 |
| H | 2.324475985  | 6.200341582  | 15.654672118 |
| C | 2.265427224  | 6.766096393  | 13.565974023 |
| H | 1.727326881  | 7.489428889  | 12.940552731 |
| H | 1.980373085  | 5.768613719  | 13.214593209 |
| C | 3.454069252  | 7.237500566  | 10.340578782 |
| H | 4.062508971  | 6.967845899  | 9.466578684  |
| C | 3.434334933  | 8.779347167  | 10.440624169 |
| H | 4.437266643  | 9.175946270  | 10.627545612 |
| H | 2.807810132  | 9.075654318  | 11.291765663 |
| C | 2.857994764  | 9.406414463  | 9.159456362  |
| H | 2.838902917  | 10.498231193 | 9.259819252  |
| H | 3.526657113  | 9.178994481  | 8.317322660  |
| C | 1.453228729  | 8.866148852  | 8.857856172  |
| H | 0.765643545  | 9.185702729  | 9.654757305  |
| H | 1.071745608  | 9.294529373  | 7.923596698  |
| C | 1.460107940  | 7.332355775  | 8.781250007  |
| H | 2.066958281  | 7.014266091  | 7.921663455  |
| H | 0.446524571  | 6.952325438  | 8.606677160  |
| C | 2.034920755  | 6.698410897  | 10.061024413 |
| H | 2.056502337  | 5.610510362  | 9.957561169  |
| H | 1.371382118  | 6.924748164  | 10.903715248 |
| F | 8.872751588  | 3.911975510  | 12.241125388 |
| F | 9.570630554  | 3.736232698  | 10.057609640 |
| F | 7.329360502  | 3.965153263  | 10.536353460 |
| F | 8.389556827  | 2.000164518  | 11.053226307 |
| B | 8.575956008  | 3.388908301  | 10.947075322 |
| H | 6.329403516  | 1.589126555  | 11.526311477 |

=====

3

=====

|   |             |             |              |
|---|-------------|-------------|--------------|
| O | 1.180719380 | 2.635873568 | 11.518811416 |
| H | 0.271649538 | 2.323103699 | 11.607103822 |
| C | 1.978162364 | 1.964099790 | 12.403660725 |
| C | 1.454053001 | 0.989511678 | 13.269268004 |
| C | 3.328023518 | 2.290098455 | 12.412763526 |
| C | 2.323451387 | 0.345387814 | 14.152130503 |
| C | 4.181124009 | 1.625857800 | 13.304868934 |
| C | 3.691516677 | 0.653704099 | 14.178816089 |
| H | 0.393755901 | 0.765351974 | 13.248954823 |
| H | 4.318661302 | 0.123769673 | 14.882404283 |
| O | 5.489169088 | 2.007374296 | 13.243111243 |
| C | 6.413403993 | 1.381595251 | 14.119059969 |

|   |              |              |              |
|---|--------------|--------------|--------------|
| H | 6.158372059  | 1.558904862  | 15.172364200 |
| H | 6.470325320  | 0.299047561  | 13.943311455 |
| H | 7.384330027  | 1.831631952  | 13.904121123 |
| O | 1.935722438  | -0.614018317 | 15.044153478 |
| C | 0.568176491  | -0.986145097 | 15.083860040 |
| H | 0.230797956  | -1.399840897 | 14.123772109 |
| H | 0.485992969  | -1.756243670 | 15.853108231 |
| H | -0.076569781 | -0.138659152 | 15.354099541 |
| H | 3.720310397  | 3.042422648  | 11.740452026 |

=====  
4  
=====

|    |              |              |              |
|----|--------------|--------------|--------------|
| Ru | 3.655598577  | 4.240755458  | 12.425499178 |
| H  | 4.977377917  | 3.909169145  | 11.687564824 |
| P  | 3.846443114  | 6.395719157  | 11.570415228 |
| O  | 5.382370226  | 4.946985726  | 14.759404844 |
| C  | 4.708716707  | 4.679766868  | 13.855152664 |
| C  | 5.430923358  | 6.752646524  | 10.654407043 |
| H  | 5.344672869  | 7.784932276  | 10.288341593 |
| C  | 5.606775778  | 5.817332706  | 9.436284863  |
| H  | 4.756070076  | 5.899134263  | 8.750710354  |
| H  | 5.632510007  | 4.776835149  | 9.786552007  |
| C  | 6.909798358  | 6.131126287  | 8.681460824  |
| H  | 7.018201500  | 5.438174785  | 7.839621297  |
| H  | 6.843692945  | 7.140639795  | 8.251641315  |
| C  | 8.128796681  | 6.050136315  | 9.610685536  |
| H  | 9.042392772  | 6.303966452  | 9.062304390  |
| H  | 8.248758885  | 5.015332882  | 9.961912359  |
| C  | 7.957586499  | 6.979157916  | 10.820552573 |
| H  | 7.936146546  | 8.023670498  | 10.479321159 |
| H  | 8.811382053  | 6.888766675  | 11.501113868 |
| C  | 6.659836225  | 6.671731242  | 11.587723537 |
| H  | 6.720472313  | 5.661366207  | 12.012470192 |
| H  | 6.558979378  | 7.367077098  | 12.428409262 |
| C  | 3.725233947  | 7.696410432  | 12.905049932 |
| H  | 4.666978742  | 7.533486969  | 13.448746956 |
| C  | 3.708698379  | 9.161707319  | 12.423064017 |
| H  | 4.513761503  | 9.350973991  | 11.704794094 |
| H  | 2.762180693  | 9.362207149  | 11.905475408 |
| C  | 3.839270578  | 10.118582601 | 13.622313405 |
| H  | 4.824521651  | 9.975550202  | 14.087679867 |
| H  | 3.806023347  | 11.155558966 | 13.270357772 |
| C  | 2.738663273  | 9.868212706  | 14.664413535 |
| H  | 2.876107121  | 10.529790756 | 15.526482832 |
| H  | 1.762579186  | 10.121736206 | 14.226496464 |
| C  | 2.721007009  | 8.400418652  | 15.118746878 |
| H  | 1.900026049  | 8.226620287  | 15.823715078 |
| H  | 3.651400149  | 8.169027763  | 15.655825089 |
| C  | 2.585885584  | 7.445399786  | 13.919865928 |
| H  | 1.615457379  | 7.611234278  | 13.437422300 |
| H  | 2.595790213  | 6.404728024  | 14.266643677 |
| C  | 2.480650887  | 6.557745411  | 10.297733467 |
| H  | 2.646505433  | 5.656432019  | 9.687273281  |
| C  | 2.540649884  | 7.770104242  | 9.342121786  |
| H  | 3.533240488  | 7.871622002  | 8.893443880  |
| H  | 2.350215715  | 8.691062718  | 9.904582382  |
| C  | 1.483103883  | 7.615598617  | 8.232458976  |
| H  | 1.513172311  | 8.489200752  | 7.572372205  |
| H  | 1.741826547  | 6.745757334  | 7.612079277  |
| C  | 0.070055083  | 7.431909699  | 8.807630354  |
| H  | -0.233169350 | 8.353095810  | 9.324392941  |
| H  | -0.651843747 | 7.274069458  | 7.999351089  |
| C  | 0.013547553  | 6.264830715  | 9.806550423  |
| H  | 0.199131272  | 5.319506022  | 9.271646148  |
| H  | -0.986443734 | 6.186913198  | 10.248893652 |
| C  | 1.067700123  | 6.442625027  | 10.911889952 |
| H  | 1.014465724  | 5.622307810  | 11.641232173 |



|   |              |              |              |
|---|--------------|--------------|--------------|
| H | 0.842157754  | 7.357471344  | 11.472277453 |
| O | 2.168584433  | 3.015476131  | 11.012218767 |
| H | 1.335018458  | 3.424201988  | 10.731202896 |
| C | 2.074843249  | 2.555491011  | 12.326710822 |
| C | 1.015529069  | 2.956521145  | 13.155089231 |
| C | 3.188952507  | 1.836456307  | 12.785685498 |
| C | 1.056875587  | 2.540357495  | 14.499752774 |
| C | 3.185777379  | 1.430751762  | 14.157457117 |
| C | 2.136993271  | 1.786310015  | 14.999077599 |
| H | 0.195084244  | 3.536512233  | 12.753318388 |
| H | 3.916418808  | 1.414962077  | 12.102726199 |
| H | 2.105143650  | 1.499229654  | 16.041231593 |
| O | 0.107260004  | 2.835458615  | 15.400732904 |
| C | -1.042079942 | 3.583940566  | 14.994905174 |
| H | -0.756058038 | 4.579880780  | 14.635098814 |
| H | -1.605771238 | 3.052737972  | 14.219202245 |
| H | -1.658509404 | 3.683602570  | 15.887783943 |
| O | 4.248163856  | 0.701334055  | 14.518022484 |
| C | 4.358045280  | 0.251205349  | 15.875814896 |
| H | 4.398182344  | 1.101287873  | 16.565890943 |
| H | 3.521779334  | -0.406006846 | 16.138228684 |
| H | 5.292837108  | -0.306004928 | 15.923806550 |

=====

#### 4-TS

=====

|    |             |              |              |
|----|-------------|--------------|--------------|
| Ru | 3.575891474 | 4.381766479  | 12.605036122 |
| H  | 4.633843819 | 3.365810050  | 11.964481523 |
| P  | 3.837722343 | 6.520032251  | 11.601054947 |
| O  | 5.628370173 | 5.081582964  | 14.662980705 |
| C  | 4.840066956 | 4.807843284  | 13.861540988 |
| C  | 5.407836332 | 6.794963722  | 10.636089310 |
| H  | 5.339435637 | 7.805061325  | 10.209553348 |
| C  | 5.521465938 | 5.774729308  | 9.480070543  |
| H  | 4.657778094 | 5.843535987  | 8.809270332  |
| H  | 5.515430173 | 4.761280193  | 9.904568521  |
| C  | 6.815306967 | 5.988379040  | 8.676257474  |
| H  | 6.879431856 | 5.234952829  | 7.883251364  |
| H  | 6.771758905 | 6.966811159  | 8.177308946  |
| C  | 8.054164863 | 5.930780543  | 9.580528752  |
| H  | 8.961010313 | 6.117057315  | 8.995108834  |
| H  | 8.151184484 | 4.918800517  | 9.998846413  |
| C  | 7.942674612 | 6.944527686  | 10.727740941 |
| H  | 7.944896190 | 7.963858055  | 10.316859555 |
| H  | 8.809981773 | 6.872415947  | 11.393127092 |
| C  | 6.655706907 | 6.731620542  | 11.543959945 |
| H  | 6.695064746 | 5.748020944  | 12.029824817 |
| H  | 6.598593758 | 7.481699696  | 12.340580462 |
| C  | 3.765476140 | 7.863476591  | 12.894458707 |
| H  | 4.717054491 | 7.704672911  | 13.422665866 |
| C  | 3.752352330 | 9.314502802  | 12.373848071 |
| H  | 4.546674647 | 9.475018486  | 11.636489231 |
| H  | 2.798900791 | 9.508286722  | 11.866573436 |
| C  | 3.908835860 | 10.302577741 | 13.544237435 |
| H  | 4.901127530 | 10.166883029 | 13.996617992 |
| H  | 3.874515183 | 11.329805935 | 13.165022298 |
| C  | 2.824851010 | 10.086275678 | 14.611701419 |
| H  | 2.979216629 | 10.771328966 | 15.452194771 |
| H  | 1.842156757 | 10.330540121 | 14.183577605 |
| C  | 2.810359915 | 8.632446988  | 15.110090564 |
| H  | 2.002151056 | 8.482472169  | 15.834586084 |
| H  | 3.750490827 | 8.412847150  | 15.634878168 |
| C  | 2.647538520 | 7.645950279  | 13.940776856 |
| H  | 1.665987875 | 7.797713758  | 13.478120081 |
| H  | 2.664229579 | 6.614158503  | 14.320997988 |
| C  | 2.437474017 | 6.660799236  | 10.362444417 |
| H  | 2.571549367 | 5.736890259  | 9.778930066  |
| C  | 2.492170155 | 7.841943589  | 9.369220261  |

|   |              |             |              |
|---|--------------|-------------|--------------|
| H | 3.472009116  | 7.902932824 | 8.885663753  |
| H | 2.346016454  | 8.784022740 | 9.909395276  |
| C | 1.392323948  | 7.687066887 | 8.302057143  |
| H | 1.419717359  | 8.543492385 | 7.619741045  |
| H | 1.605770801  | 6.795954432 | 7.694888979  |
| C | -0.001549054 | 7.552299608 | 8.934796764  |
| H | -0.259864238 | 8.487771625 | 9.450145747  |
| H | -0.758361426 | 7.404566342 | 8.156977396  |
| C | -0.048338336 | 6.397457681 | 9.948409255  |
| H | 0.106349905  | 5.443200338 | 9.419806852  |
| H | -1.034851414 | 6.342099585 | 10.422810244 |
| C | 1.041411996  | 6.579049771 | 11.019874695 |
| H | 0.993338664  | 5.771969982 | 11.766024183 |
| H | 0.843857581  | 7.507179474 | 11.568379806 |
| O | 1.733418259  | 3.162325244 | 11.327045605 |
| H | 0.918939268  | 3.578615484 | 11.007482381 |
| C | 1.525618448  | 2.536437603 | 12.562097162 |
| C | 0.266080106  | 2.309474896 | 13.089166809 |
| C | 2.739132456  | 2.323743811 | 13.229834023 |
| C | 0.244351432  | 1.749248816 | 14.383313649 |
| C | 2.679048747  | 1.760431888 | 14.528627623 |
| C | 1.432760699  | 1.488987129 | 15.092391025 |
| H | -0.632961955 | 2.511110240 | 12.521637517 |
| H | 3.846406561  | 2.485101810 | 12.476535391 |
| H | 1.330400143  | 1.052790847 | 16.077299795 |
| O | -0.882403808 | 1.423216162 | 15.040459786 |
| C | -2.147968152 | 1.622183231 | 14.406792311 |
| H | -2.319254019 | 2.682970482 | 14.187183396 |
| H | -2.225901594 | 1.033375162 | 13.485171064 |
| H | -2.893529525 | 1.275692973 | 15.122174008 |
| O | 3.861331199  | 1.538653555 | 15.126856217 |
| C | 3.875265455  | 1.004498197 | 16.455979898 |
| H | 3.361193564  | 1.674668939 | 17.154489831 |
| H | 3.413117993  | 0.011451946 | 16.484869352 |
| H | 4.927081421  | 0.926296740 | 16.729519331 |

=====

5

=====

|    |             |             |              |
|----|-------------|-------------|--------------|
| Ru | 1.047291610 | 4.728104912 | 11.365818556 |
| P  | 2.656111080 | 6.122086761 | 12.248791068 |
| O  | 1.182532003 | 6.095999568 | 8.702663675  |
| C  | 1.137763666 | 5.567452029 | 9.729754585  |
| C  | 4.364161393 | 6.030861990 | 11.513056160 |
| H  | 4.919887014 | 6.826955783 | 12.030999951 |
| C  | 4.379299686 | 6.333269306 | 9.998259982  |
| H  | 3.914648825 | 7.301762299 | 9.783402369  |
| H  | 3.797712790 | 5.566123289 | 9.477547230  |
| C  | 5.819086708 | 6.321303702 | 9.455976496  |
| H  | 5.801314795 | 6.522080787 | 8.378941251  |
| H  | 6.392383503 | 7.137042660 | 9.918361413  |
| C  | 6.509913050 | 4.981570790 | 9.745944357  |
| H  | 7.539335807 | 4.993527456 | 9.371813124  |
| H  | 5.983591477 | 4.181232464 | 9.206294284  |
| C  | 6.491066659 | 4.670266269 | 11.248816303 |
| H  | 7.094656296 | 5.416648345 | 11.784281004 |
| H  | 6.949806898 | 3.695172797 | 11.447466513 |
| C  | 5.057025476 | 4.680309283 | 11.805830128 |
| H  | 4.479354044 | 3.877534437 | 11.336701245 |
| H  | 5.077998074 | 4.468445434 | 12.879652680 |
| C  | 2.827405201 | 5.669333218 | 14.052333152 |
| H  | 3.016758128 | 4.588597278 | 13.995314831 |
| C  | 4.008496033 | 6.319859254 | 14.810810558 |
| H  | 4.949606074 | 6.194075263 | 14.267566153 |
| H  | 3.838646477 | 7.397584566 | 14.907253031 |
| C  | 4.132747660 | 5.695691650 | 16.213603015 |
| H  | 4.396157464 | 4.633589065 | 16.109473292 |
| H  | 4.959216980 | 6.172294475 | 16.752160922 |

|   |              |              |              |
|---|--------------|--------------|--------------|
| C | 2.826441843  | 5.824471459  | 17.011505065 |
| H | 2.928599177  | 5.337058396  | 17.987020168 |
| H | 2.627845488  | 6.886898548  | 17.210860408 |
| C | 1.638554680  | 5.228514221  | 16.240899840 |
| H | 0.706246397  | 5.375574534  | 16.797574411 |
| H | 1.776500921  | 4.143328852  | 16.130896922 |
| C | 1.513439405  | 5.857418970  | 14.843235106 |
| H | 1.302090863  | 6.928531580  | 14.949679349 |
| H | 0.663203085  | 5.416317242  | 14.307672663 |
| C | 2.058857434  | 7.873577011  | 12.004539324 |
| H | 2.260389700  | 8.035177225  | 10.936230995 |
| C | 2.808255993  | 8.962437528  | 12.800408348 |
| H | 3.891885636  | 8.873506084  | 12.664287641 |
| H | 2.605656669  | 8.831878128  | 13.870472945 |
| C | 2.330909936  | 10.361101511 | 12.367819275 |
| H | 2.854748573  | 11.123526776 | 12.954662235 |
| H | 2.607601817  | 10.526579026 | 11.317392305 |
| C | 0.810065657  | 10.509148063 | 12.528782704 |
| H | 0.551561488  | 10.450232727 | 13.595562269 |
| H | 0.486949517  | 11.496670563 | 12.182698462 |
| C | 0.055586916  | 9.409406852  | 11.765032960 |
| H | 0.224604823  | 9.527291826  | 10.685834943 |
| H | -1.024041608 | 9.498842441  | 11.927394643 |
| C | 0.529335326  | 8.010676046  | 12.197126132 |
| H | -0.009415769 | 7.246832931  | 11.612640010 |
| H | 0.268604962  | 7.848111900  | 13.248657687 |
| O | 1.211517347  | 3.022504653  | 13.041823575 |
| H | 0.512876879  | 2.505156669  | 13.468810231 |
| C | 1.831170500  | 2.282381456  | 12.001339673 |
| C | 2.200297456  | 0.950306319  | 12.099281966 |
| C | 2.049462874  | 3.095405882  | 10.896447855 |
| C | 2.859887275  | 0.420510304  | 10.973852169 |
| C | 2.744203440  | 2.552372844  | 9.795269195  |
| C | 3.136320388  | 1.214707369  | 9.841775860  |
| H | 2.002622567  | 0.370321374  | 12.991743614 |
| H | 3.653823997  | 0.736642581  | 9.019996877  |
| O | 2.975923892  | 3.392854870  | 8.758750994  |
| C | 3.627452838  | 2.885600720  | 7.591435257  |
| H | 4.639917352  | 2.535009657  | 7.823887796  |
| H | 3.049718110  | 2.071155980  | 7.140022570  |
| H | 3.681844826  | 3.724091075  | 6.897019255  |
| O | 3.286928645  | -0.856333751 | 10.881397978 |
| C | 3.043960881  | -1.751651505 | 11.965839798 |
| H | 1.969263283  | -1.865897973 | 12.153499230 |
| H | 3.461438538  | -2.710222291 | 11.657630058 |
| H | 3.545426603  | -1.413981608 | 12.881172865 |

---

## 5-TS

---

|    |             |             |              |
|----|-------------|-------------|--------------|
| Ru | 1.051735872 | 4.840003307 | 11.373239217 |
| P  | 2.722491295 | 6.100781813 | 12.312000790 |
| O  | 1.361699038 | 6.070359684 | 8.662369032  |
| C  | 1.270427443 | 5.612169657 | 9.720793656  |
| C  | 4.436993268 | 6.053596381 | 11.581012213 |
| H  | 4.982425486 | 6.842461269 | 12.120638441 |
| C  | 4.453416752 | 6.394667499 | 10.074597959 |
| H  | 3.966656652 | 7.356952825 | 9.880409833  |
| H  | 3.891926652 | 5.626497899 | 9.533579730  |
| C  | 5.894247559 | 6.426463381 | 9.535280805  |
| H  | 5.874569662 | 6.655670168 | 8.463848617  |
| H  | 6.451451096 | 7.239972922 | 10.020670034 |
| C  | 6.608943573 | 5.091990086 | 9.790375228  |
| H  | 7.640242532 | 5.133505294 | 9.422983871  |
| H  | 6.100079728 | 4.298894437 | 9.224026175  |
| C  | 6.586048593 | 4.736148105 | 11.283550825 |
| H  | 7.172823247 | 5.477392121 | 11.844258062 |
| H  | 7.061630573 | 3.764150878 | 11.456167362 |

|   |              |              |              |
|---|--------------|--------------|--------------|
| C | 5.148491676  | 4.703728284  | 11.830908875 |
| H | 4.587093832  | 3.910505071  | 11.328787510 |
| H | 5.164927392  | 4.451615405  | 12.895728333 |
| C | 2.895617524  | 5.600754466  | 14.103394781 |
| H | 3.063400560  | 4.518542042  | 14.016245405 |
| C | 4.091294529  | 6.210152042  | 14.873500199 |
| H | 5.026770989  | 6.099693727  | 14.317909923 |
| H | 3.932577751  | 7.284846005  | 15.016146326 |
| C | 4.223250158  | 5.525594228  | 16.246959190 |
| H | 4.468347776  | 4.464833935  | 16.092783467 |
| H | 5.063719345  | 5.964964161  | 16.796220087 |
| C | 2.927828337  | 5.640008952  | 17.065871257 |
| H | 3.032795914  | 5.104546022  | 18.015816000 |
| H | 2.753952814  | 6.695794971  | 17.318578861 |
| C | 1.717750237  | 5.106098200  | 16.282766560 |
| H | 0.794987482  | 5.253891534  | 16.856256014 |
| H | 1.823551636  | 4.023374207  | 16.124268639 |
| C | 1.592297466  | 5.792051666  | 14.912395105 |
| H | 1.412530591  | 6.864344912  | 15.063039719 |
| H | 0.728106482  | 5.388845505  | 14.374439516 |
| C | 2.109191083  | 7.856214213  | 12.138894718 |
| H | 2.327301282  | 8.076979267  | 11.084378757 |
| C | 2.804741596  | 8.927258393  | 13.001982513 |
| H | 3.892520611  | 8.883492619  | 12.875286494 |
| H | 2.596072139  | 8.732405053  | 14.061052258 |
| C | 2.280824531  | 10.329031183 | 12.637443261 |
| H | 2.764524716  | 11.078868435 | 13.273026797 |
| H | 2.566485608  | 10.561988722 | 11.602167589 |
| C | 0.752430269  | 10.411329350 | 12.778803432 |
| H | 0.478903083  | 10.279845140 | 13.835442505 |
| H | 0.397164804  | 11.404892781 | 12.484681281 |
| C | 0.051988579  | 9.331037042  | 11.938854199 |
| H | 0.238043690  | 9.515267166  | 10.871810656 |
| H | -1.033405810 | 9.374408687  | 12.083080036 |
| C | 0.570765499  | 7.929540535  | 12.304035872 |
| H | 0.072927680  | 7.181462668  | 11.661056116 |
| H | 0.293078735  | 7.695686942  | 13.337472468 |
| O | 1.048494248  | 3.190201780  | 13.105148453 |
| H | 0.230803873  | 2.746223302  | 13.393570648 |
| C | 1.757772544  | 2.408692746  | 12.164744704 |
| C | 2.079180119  | 1.068358310  | 12.336532455 |
| C | 2.078681250  | 3.168478901  | 11.051411027 |
| C | 2.796081969  | 0.478101833  | 11.282041267 |
| C | 2.803183280  | 2.559338749  | 10.013282086 |
| C | 3.162072344  | 1.215535196  | 10.138563177 |
| H | 1.788498557  | 0.530723668  | 13.230049859 |
| H | 3.711546984  | 0.690587845  | 9.367754780  |
| O | 3.078616478  | 3.335195997  | 8.932863598  |
| C | 3.721201763  | 2.734541228  | 7.808094382  |
| H | 4.727438719  | 2.383875869  | 8.063551033  |
| H | 3.130992507  | 1.899083724  | 7.416359525  |
| H | 3.791383662  | 3.517220694  | 7.053720902  |
| O | 3.179574828  | -0.823524735 | 11.259233374 |
| C | 2.895945045  | -1.640080102 | 12.392987140 |
| H | 1.814038957  | -1.737810740 | 12.555651853 |
| H | 3.317173364  | -2.621351330 | 12.168651097 |
| H | 3.367789300  | -1.241111281 | 13.300148899 |
| H | -1.275294673 | 4.034634130  | 7.353869713  |
| O | -1.684474003 | 4.425636130  | 8.138163430  |
| C | -1.609063020 | 3.539253538  | 9.175934909  |
| C | -1.877956057 | 4.079374069  | 10.398175953 |
| C | -1.311259145 | 2.144381909  | 8.772668756  |
| H | -2.060899652 | 5.151937114  | 10.349840597 |
| C | -1.996034988 | 3.510277579  | 11.744466743 |
| C | -0.349188300 | 1.353386050  | 9.416380857  |
| C | -1.973746582 | 1.627547269  | 7.643952157  |
| C | -0.058685434 | 0.073909826  | 8.946491902  |
| H | 0.178280456  | 1.743488245  | 10.274332060 |

|   |              |              |              |
|---|--------------|--------------|--------------|
| C | -1.687931063 | 0.345056325  | 7.183108028  |
| H | -2.732699911 | 2.224859726  | 7.146355378  |
| C | -0.727525947 | -0.433765140 | 7.831328395  |
| H | 0.701798026  | -0.517665126 | 9.446657708  |
| H | -2.216435565 | -0.046025158 | 6.319468367  |
| H | -0.500605447 | -1.431166805 | 7.466956660  |
| C | -2.051986045 | 2.137971258  | 12.057782629 |
| C | -2.030694653 | 4.427765695  | 12.821720383 |
| C | -2.091143751 | 1.709786912  | 13.385432829 |
| H | -2.068936092 | 1.402540933  | 11.263922307 |
| C | -2.071160232 | 3.998737613  | 14.146425717 |
| H | -2.025656481 | 5.494203158  | 12.605291514 |
| C | -2.088821942 | 2.631734604  | 14.439985861 |
| H | -2.134960043 | 0.645009247  | 13.597638402 |
| H | -2.092709683 | 4.729976372  | 14.949534697 |
| H | -2.122617714 | 2.289423906  | 15.469701302 |

=====

6

=====

|    |             |              |              |
|----|-------------|--------------|--------------|
| Ru | 0.919682562 | 4.709784630  | 11.334013212 |
| P  | 2.639571206 | 6.053926611  | 12.165170054 |
| O  | 1.393226193 | 5.713606631  | 8.555901009  |
| C  | 1.208711703 | 5.340471341  | 9.637124192  |
| C  | 4.386493246 | 5.858054922  | 11.539947995 |
| H  | 4.924528521 | 6.725133090  | 11.950605673 |
| C  | 4.471414401 | 5.925935363  | 9.999511052  |
| H  | 4.014609912 | 6.846620479  | 9.619722707  |
| H  | 3.912160682 | 5.086725804  | 9.574095141  |
| C  | 5.934306832 | 5.847102984  | 9.529157495  |
| H  | 5.965887590 | 5.875124825  | 8.433808993  |
| H  | 6.480487598 | 6.733636712  | 9.881476411  |
| C  | 6.623545144 | 4.580994027  | 10.057665016 |
| H  | 7.670817693 | 4.553608616  | 9.736720200  |
| H  | 6.135444306 | 3.696727881  | 9.623440678  |
| C  | 6.529223743 | 4.500749066  | 11.587903772 |
| H  | 7.098634460 | 5.329656574  | 12.032326643 |
| H  | 6.986277537 | 3.574236950  | 11.953809372 |
| C  | 5.068054572 | 4.572309673  | 12.064721466 |
| H  | 4.523244620 | 3.698133251  | 11.695404506 |
| H  | 5.036761232 | 4.523115449  | 13.157497977 |
| C  | 2.744982522 | 5.871816584  | 14.021487047 |
| H  | 2.923571773 | 4.793954314  | 14.128057337 |
| C  | 3.904469365 | 6.619898148  | 14.719892551 |
| H  | 4.862051755 | 6.427622472  | 14.227283132 |
| H  | 3.734589534 | 7.700918097  | 14.668659643 |
| C  | 3.986587687 | 6.187842227  | 16.196485399 |
| H  | 4.246532199 | 5.120459882  | 16.241471131 |
| H  | 4.800118000 | 6.729755589  | 16.692147061 |
| C  | 2.658172327 | 6.423473670  | 16.932162248 |
| H  | 2.728516714 | 6.066620310  | 17.965775573 |
| H  | 2.463858510 | 7.504263185  | 16.986144161 |
| C  | 1.487174149 | 5.739511924  | 16.209088923 |
| H  | 0.540485685 | 5.965361157  | 16.713627097 |
| H  | 1.614300187 | 4.648146336  | 16.244733420 |
| C  | 1.410620195 | 6.178852824  | 14.737237539 |
| H  | 1.216252623 | 7.258309887  | 14.696735111 |
| H  | 0.571925601 | 5.677565241  | 14.241157305 |
| C  | 2.112644818 | 7.781110668  | 11.676209973 |
| H  | 2.325208454 | 7.785318385  | 10.597448754 |
| C  | 2.878967689 | 8.958476154  | 12.309836734 |
| H  | 3.961511960 | 8.823117280  | 12.208042021 |
| H  | 2.659113169 | 8.998442809  | 13.383849474 |
| C  | 2.445830314 | 10.285748601 | 11.659961064 |
| H  | 2.983608500 | 11.117924336 | 12.127822230 |
| H  | 2.736647252 | 10.278702453 | 10.600042623 |
| C  | 0.927596581 | 10.496125761 | 11.774210161 |
| H  | 0.657789665 | 10.610449237 | 12.833878272 |

|   |              |              |              |
|---|--------------|--------------|--------------|
| H | 0.634319011  | 11.425769415 | 11.274447314 |
| C | 0.148942022  | 9.309765513  | 11.181978323 |
| H | 0.327894119  | 9.254338371  | 10.099129516 |
| H | -0.929243580 | 9.451288214  | 11.317781580 |
| C | 0.585693085  | 7.984582474  | 11.829912090 |
| H | 0.029421190  | 7.152787986  | 11.364339638 |
| H | 0.314801796  | 7.991165622  | 12.891169162 |
| O | 1.108775754  | 3.358187354  | 13.288450627 |
| H | 0.318826324  | 2.879229824  | 13.601149341 |
| C | 1.869612194  | 2.494034139  | 12.459354840 |
| C | 2.412928416  | 1.290389732  | 12.891101048 |
| C | 2.029629245  | 3.043755886  | 11.201504184 |
| C | 3.189520772  | 0.600315253  | 11.947017143 |
| C | 2.825241656  | 2.346655770  | 10.279376202 |
| C | 3.393180777  | 1.125246128  | 10.655678631 |
| H | 2.246295544  | 0.934725658  | 13.899854753 |
| H | 4.009931926  | 0.545468216  | 9.980418975  |
| O | 2.996426058  | 2.928453235  | 9.054220142  |
| C | 3.815764695  | 2.267923418  | 8.092064185  |
| H | 4.842351963  | 2.144071639  | 8.456619247  |
| H | 3.406894669  | 1.284691096  | 7.828538255  |
| H | 3.818003754  | 2.911956161  | 7.211733708  |
| O | 3.802088483  | -0.588908471 | 12.182342409 |
| C | 3.672296284  | -1.176303257 | 13.472213312 |
| H | 2.623872611  | -1.403094548 | 13.707313576 |
| H | 4.242393669  | -2.105557937 | 13.437430521 |
| H | 4.086603360  | -0.525639403 | 14.253486998 |
| H | -1.262199937 | 4.173316812  | 7.934590362  |
| O | -1.404445037 | 4.564655004  | 8.809238232  |
| C | -1.347811323 | 3.591206123  | 9.755653416  |
| C | -1.562979085 | 3.997723315  | 11.052934077 |
| C | -1.122972268 | 2.223604138  | 9.235078541  |
| H | -1.900340171 | 5.033248020  | 11.129148233 |
| C | -1.782350363 | 3.193879491  | 12.273355090 |
| C | -2.068956791 | 1.208751550  | 9.440056922  |
| C | 0.010800068  | 1.973896244  | 8.444454199  |
| C | -1.869488266 | -0.050175628 | 8.876188592  |
| H | -2.950406934 | 1.409184454  | 10.041178833 |
| C | 0.208987191  | 0.707732210  | 7.894167857  |
| H | 0.755914578  | 2.751060107  | 8.304797142  |
| C | -0.727924346 | -0.304709841 | 8.110028355  |
| H | -2.607100466 | -0.832148132 | 9.031230534  |
| H | 1.095742888  | 0.511025710  | 7.297815267  |
| H | -0.573522517 | -1.289482616 | 7.677306407  |
| C | -1.322908950 | 1.871671052  | 12.467025780 |
| C | -2.434737300 | 3.823648674  | 13.354277837 |
| C | -1.522251767 | 1.215809562  | 13.684893241 |
| H | -0.772608173 | 1.367677385  | 11.681141467 |
| C | -2.633863733 | 3.164939207  | 14.569105709 |
| H | -2.793216195 | 4.844580231  | 13.235339494 |
| C | -2.177535868 | 1.855386662  | 14.745866317 |
| H | -1.151171388 | 0.200221822  | 13.804047124 |
| H | -3.144730458 | 3.679567710  | 15.379634864 |
| H | -2.328195426 | 1.341057940  | 15.691022565 |

=====

## 6-TS

=====

|    |             |             |              |
|----|-------------|-------------|--------------|
| Ru | 0.194056815 | 4.831697090 | 10.089732482 |
| P  | 1.862614306 | 5.713415928 | 11.599418726 |
| O  | 0.879145915 | 6.928403789 | 8.096932366  |
| C  | 0.639483497 | 6.082903349 | 8.857396176  |
| C  | 3.662537610 | 5.531951260 | 11.110988955 |
| H  | 4.265786776 | 5.990355483 | 11.905875376 |
| C  | 3.956907297 | 6.265663678 | 9.783607415  |
| H  | 3.758798227 | 7.338489111 | 9.880772843  |
| H  | 3.283802589 | 5.883018990 | 9.006385017  |
| C  | 5.411411112 | 6.056707998 | 9.330367708  |

|   |              |              |              |
|---|--------------|--------------|--------------|
| H | 5.571247204  | 6.568879404  | 8.374279961  |
| H | 6.090050615  | 6.527806923  | 10.055252037 |
| C | 5.752211106  | 4.565987357  | 9.211128079  |
| H | 6.794345382  | 4.434355447  | 8.899207096  |
| H | 5.126530293  | 4.109756132  | 8.429865338  |
| C | 5.492189876  | 3.841316263  | 10.537565215 |
| H | 6.180704741  | 4.224731352  | 11.303893500 |
| H | 5.697018778  | 2.768487425  | 10.436718511 |
| C | 4.041604954  | 4.039038530  | 11.002994386 |
| H | 3.372778585  | 3.561376309  | 10.285077428 |
| H | 3.889483010  | 3.530303826  | 11.961779497 |
| C | 1.725951867  | 4.828024757  | 13.247503773 |
| H | 1.771486008  | 3.776755817  | 12.927241690 |
| C | 2.857857276  | 5.057901059  | 14.271262780 |
| H | 3.841020038  | 4.893889835  | 13.818992553 |
| H | 2.837999587  | 6.098270263  | 14.615083368 |
| C | 2.683514729  | 4.120316213  | 15.480508753 |
| H | 2.810901267  | 3.079881626  | 15.146375152 |
| H | 3.477201711  | 4.311069255  | 16.211871110 |
| C | 1.301572429  | 4.281090916  | 16.132595927 |
| H | 1.189799572  | 3.576096014  | 16.964092953 |
| H | 1.222710401  | 5.289240448  | 16.563669759 |
| C | 0.173588583  | 4.087282968  | 15.107041956 |
| H | -0.804833176 | 4.252702307  | 15.572867250 |
| H | 0.177570331  | 3.047119257  | 14.747069315 |
| C | 0.345262765  | 5.033209401  | 13.907546478 |
| H | 0.263568095  | 6.068444069  | 14.261228254 |
| H | -0.466050091 | 4.877944151  | 13.186388898 |
| C | 1.610968528  | 7.560850442  | 11.772183251 |
| H | 1.893643539  | 7.908413829  | 10.767980941 |
| C | 2.508843252  | 8.283740599  | 12.794780539 |
| H | 3.560710524  | 8.007899814  | 12.660967831 |
| H | 2.222915681  | 7.973959950  | 13.807990093 |
| C | 2.345149227  | 9.809072977  | 12.672476309 |
| H | 2.972878198  | 10.309323087 | 13.418712126 |
| H | 2.712732229  | 10.129708430 | 11.687250922 |
| C | 0.877694375  | 10.234062110 | 12.833451168 |
| H | 0.550130536  | 10.013602608 | 13.859805063 |
| H | 0.779592987  | 11.317115694 | 12.700428954 |
| C | -0.031378632 | 9.491120513  | 11.842117779 |
| H | 0.217797570  | 9.798307636  | 10.816518658 |
| H | -1.080291280 | 9.764858665  | 12.005684985 |
| C | 0.132544048  | 7.966908587  | 11.963757842 |
| H | -0.503349647 | 7.461439051  | 11.224957444 |
| H | -0.221145766 | 7.643049764  | 12.949406745 |
| O | 0.468731351  | 2.334685892  | 11.148275281 |
| H | 0.608508576  | 1.628933340  | 11.793546767 |
| C | 1.243050741  | 2.171619427  | 10.028328650 |
| C | 2.175450080  | 1.149367441  | 9.921634863  |
| C | 1.027722699  | 3.181356407  | 9.067252691  |
| C | 3.009975215  | 1.151279832  | 8.792683975  |
| C | 1.986995804  | 3.205750798  | 8.011610891  |
| C | 2.930840166  | 2.189940924  | 7.850009023  |
| H | 2.253339512  | 0.392114879  | 10.693039531 |
| H | 3.632449204  | 2.174423165  | 7.026580355  |
| O | 1.879376869  | 4.251763574  | 7.163057915  |
| C | 2.770896453  | 4.368749038  | 6.053466939  |
| H | 3.813545145  | 4.419229836  | 6.386879324  |
| H | 2.650312093  | 3.531372458  | 5.355238177  |
| H | 2.498146800  | 5.301622948  | 5.560242043  |
| O | 3.940618097  | 0.209388842  | 8.535932329  |
| C | 4.039283311  | -0.922710096 | 9.400912304  |
| H | 3.080081888  | -1.449622803 | 9.475288706  |
| H | 4.782464211  | -1.578913602 | 8.947851114  |
| H | 4.375846221  | -0.629312047 | 10.402730462 |
| H | -0.319080501 | 2.873081263  | 6.493693720  |
| O | -0.784279314 | 3.545883280  | 7.010434358  |
| C | -0.990791745 | 3.102084393  | 8.276996577  |

|   |              |              |              |
|---|--------------|--------------|--------------|
| C | -1.624384530 | 4.136871876  | 9.049084864  |
| C | -1.309556974 | 1.634919780  | 8.349758305  |
| C | -2.254362736 | 4.180168100  | 10.373917465 |
| C | -0.424079557 | 0.673907501  | 7.836758620  |
| C | -2.579484387 | 1.231936168  | 8.784066740  |
| C | -0.790657043 | -0.668070600 | 7.795034731  |
| H | 0.555222326  | 0.971861889  | 7.478226901  |
| C | -2.940426007 | -0.115170645 | 8.746122374  |
| H | -3.296640022 | 1.969215066  | 9.123888299  |
| C | -2.046508239 | -1.068427233 | 8.259669743  |
| H | -0.096194214 | -1.402890815 | 7.398766332  |
| H | -3.926830706 | -0.413740674 | 9.088513752  |
| H | -2.329019021 | -2.116644107 | 8.234302938  |
| C | -2.723284051 | 5.462900857  | 10.775956253 |
| C | -2.334511202 | 3.137770285  | 11.329197227 |
| C | -3.245871660 | 5.683217150  | 12.049650316 |
| H | -2.700816346 | 6.278636050  | 10.057684235 |
| C | -2.864161838 | 3.367907690  | 12.594841787 |
| H | -1.975941372 | 2.151812270  | 11.074873863 |
| C | -3.324842010 | 4.635380735  | 12.966138787 |
| H | -3.600185458 | 6.674252672  | 12.317408075 |
| H | -2.921155494 | 2.545238578  | 13.302220445 |
| H | -3.735848494 | 4.800979327  | 13.957257985 |
| H | -1.892243219 | 4.975638355  | 8.410862794  |

=====  
7

|    |              |             |              |
|----|--------------|-------------|--------------|
| Ru | 0.752239103  | 4.482754861 | 9.718584620  |
| P  | 2.445519876  | 5.163360050 | 11.380445407 |
| O  | 2.000237905  | 6.382173799 | 7.803560000  |
| C  | 1.527507594  | 5.625923787 | 8.552451046  |
| C  | 4.227491880  | 4.679149476 | 11.033247472 |
| H  | 4.851050296  | 5.276420523 | 11.712789791 |
| C  | 4.615856473  | 5.025046923 | 9.578536899  |
| H  | 4.431163817  | 6.081811621 | 9.357849038  |
| H  | 3.972893197  | 4.444598840 | 8.903840654  |
| C  | 6.085507711  | 4.679916319 | 9.288481765  |
| H  | 6.320872817  | 4.925774833 | 8.246055282  |
| H  | 6.737487735  | 5.307183993 | 9.912019422  |
| C  | 6.374836101  | 3.198702234 | 9.571941588  |
| H  | 7.434769938  | 2.977027441 | 9.404262757  |
| H  | 5.806721589  | 2.573962028 | 8.868773260  |
| C  | 5.973659359  | 2.829673348 | 11.007675227 |
| H  | 6.619668530  | 3.365419956 | 11.717090249 |
| H  | 6.138282530  | 1.760127062 | 11.189774637 |
| C  | 4.504947770  | 3.186130041 | 11.299531498 |
| H  | 3.850168748  | 2.594936138 | 10.652180136 |
| H  | 4.261066326  | 2.911988463 | 12.330366876 |
| C  | 2.031473085  | 4.423789904 | 13.054351707 |
| H  | 1.947352797  | 3.354489724 | 12.798064626 |
| C  | 3.049023609  | 4.539212949 | 14.210294753 |
| H  | 4.055573430  | 4.247073510 | 13.895482308 |
| H  | 3.115807641  | 5.580209222 | 14.539321619 |
| C  | 2.587096446  | 3.671415635 | 15.396700028 |
| H  | 2.584597883  | 2.614159021 | 15.092244864 |
| H  | 3.306046104  | 3.756942078 | 16.219328807 |
| C  | 1.180617366  | 4.071651199 | 15.872948654 |
| H  | 0.854996092  | 3.417768637 | 16.689751180 |
| H  | 1.219232762  | 5.090468494 | 16.283595057 |
| C  | 0.163827336  | 4.037427118 | 14.720781453 |
| H  | -0.816919932 | 4.390364528 | 15.060935440 |
| H  | 0.022238401  | 2.998474537 | 14.385448018 |
| C  | 0.638375185  | 4.884091142 | 13.529663353 |
| H  | 0.691756378  | 5.937248370 | 13.834908536 |
| H  | -0.088165209 | 4.830307701 | 12.714562846 |
| C  | 2.569267789  | 7.041531861 | 11.501986321 |
| H  | 3.162043853  | 7.284903977 | 10.607892442 |
| C  | 3.323475357  | 7.590748844 | 12.730873560 |



|   |              |              |              |
|---|--------------|--------------|--------------|
| H | 4.288275399  | 7.089307040  | 12.864480496 |
| H | 2.730271778  | 7.389534895  | 13.631256972 |
| C | 3.527606934  | 9.112211089  | 12.614031009 |
| H | 4.063621345  | 9.479719619  | 13.496454244 |
| H | 4.165135784  | 9.327423074  | 11.744895332 |
| C | 2.183933813  | 9.839398586  | 12.457563976 |
| H | 1.589730204  | 9.700381189  | 13.372395147 |
| H | 2.342500771  | 10.917843167 | 12.347384061 |
| C | 1.401372425  | 9.288589761  | 11.257316132 |
| H | 1.941139595  | 9.526348812  | 10.329626264 |
| H | 0.420566051  | 9.773460810  | 11.180292901 |
| C | 1.215075283  | 7.764528571  | 11.347175388 |
| H | 0.697538618  | 7.407731436  | 10.454335018 |
| H | 0.566469167  | 7.521644711  | 12.198156780 |
| O | 0.242538177  | 1.925437064  | 10.547479881 |
| H | 0.495339318  | 1.400324748  | 11.320001374 |
| C | 1.162895521  | 1.817118186  | 9.550658510  |
| C | 2.275445247  | 0.997878023  | 9.673358270  |
| C | 0.866732311  | 2.630420347  | 8.404037979  |
| C | 3.219146846  | 1.012249355  | 8.636362047  |
| C | 1.955248376  | 2.690075671  | 7.438129227  |
| C | 3.075166133  | 1.887928546  | 7.541383790  |
| H | 2.417991967  | 0.405550774  | 10.568816452 |
| H | 3.872378339  | 1.907236948  | 6.811236542  |
| O | 1.790288633  | 3.591997312  | 6.450815404  |
| C | 2.831952354  | 3.793465150  | 5.483752925  |
| H | 3.759290538  | 4.094950703  | 5.980958123  |
| H | 2.993309954  | 2.887844816  | 4.890145765  |
| H | 2.479335069  | 4.600693531  | 4.843368097  |
| O | 4.340237242  | 0.279626296  | 8.627917195  |
| C | 4.594774409  | -0.641875025 | 9.695935094  |
| H | 3.797882992  | -1.390443053 | 9.764820118  |
| H | 5.535448393  | -1.129414357 | 9.442769014  |
| H | 4.701053817  | -0.114424916 | 10.650179590 |
| H | -0.113891363 | 3.524181043  | 6.179603411  |
| O | -0.729449012 | 2.846501353  | 6.496949471  |
| C | -0.662694589 | 2.787674824  | 7.906741883  |
| C | -1.019483513 | 4.146707842  | 8.511434844  |
| C | -1.546787221 | 1.583501541  | 8.224888837  |
| C | -1.630384876 | 4.555738329  | 9.763170952  |
| C | -1.040195149 | 0.281550968  | 8.156611719  |
| C | -2.921848194 | 1.765847741  | 8.395116134  |
| C | -1.882415419 | -0.816899582 | 8.321486191  |
| H | 0.014684190  | 0.117208175  | 7.957939458  |
| C | -3.768512921 | 0.668371994  | 8.556615223  |
| H | -3.335166725 | 2.769375046  | 8.397964839  |
| C | -3.249467344 | -0.626173409 | 8.531627584  |
| H | -1.474211928 | -1.822441486 | 8.270297017  |
| H | -4.834195679 | 0.826629602  | 8.694074766  |
| H | -3.906596592 | -1.481412921 | 8.659710386  |
| C | -2.113096725 | 3.705091903  | 10.803093979 |
| C | -1.565962637 | 5.957816273  | 10.051986480 |
| C | -2.589266695 | 4.242180277  | 11.989208363 |
| H | -2.155868699 | 2.638615804  | 10.636964000 |
| C | -2.039691752 | 6.477379517  | 11.266616340 |
| H | -1.270484201 | 6.640621798  | 9.260767817  |
| C | -2.562055642 | 5.627837354  | 12.232672500 |
| H | -2.990506148 | 3.573521855  | 12.745802374 |
| H | -2.007530229 | 7.549494142  | 11.433210371 |
| H | -2.946418729 | 6.024972114  | 13.166857160 |
| H | -1.059470364 | 4.908468975  | 7.733910240  |

## 7-TS

|    |             |             |              |
|----|-------------|-------------|--------------|
| Ru | 1.219740981 | 3.454271660 | 12.751253728 |
| P  | 2.249120393 | 5.544739840 | 12.605267062 |
| O  | 3.177793508 | 2.202797347 | 10.899079048 |
| C  | 2.461073341 | 2.718118728 | 11.655593916 |

|   |              |              |              |
|---|--------------|--------------|--------------|
| C | 3.636222938  | 5.946218990  | 11.418713623 |
| H | 3.875089093  | 6.997529608  | 11.630389656 |
| C | 3.148761795  | 5.838789219  | 9.959974178  |
| H | 2.248793332  | 6.441848378  | 9.802849606  |
| H | 2.864040449  | 4.799102088  | 9.764154223  |
| C | 4.246552057  | 6.254111477  | 8.968215252  |
| H | 3.872790575  | 6.138545361  | 7.944204637  |
| H | 4.474142456  | 7.321462055  | 9.101319949  |
| C | 5.522200233  | 5.426675474  | 9.178450367  |
| H | 6.306110780  | 5.747409308  | 8.483598141  |
| H | 5.311398823  | 4.371496276  | 8.953721911  |
| C | 6.014961564  | 5.547838819  | 10.627340460 |
| H | 6.309872266  | 6.588014140  | 10.825990768 |
| H | 6.908259607  | 4.933074736  | 10.784618069 |
| C | 4.929644286  | 5.129659156  | 11.637894919 |
| H | 4.726389986  | 4.060386461  | 11.518932662 |
| H | 5.314571531  | 5.276002784  | 12.652610929 |
| C | 3.067365295  | 5.560203854  | 14.301586825 |
| H | 3.965247319  | 4.949986808  | 14.142649240 |
| C | 3.521802030  | 6.941697839  | 14.812943130 |
| H | 4.170415980  | 7.426217627  | 14.074115781 |
| H | 2.648021201  | 7.590459538  | 14.944241250 |
| C | 4.251441150  | 6.817039104  | 16.161728504 |
| H | 5.180800496  | 6.247399258  | 16.022469030 |
| H | 4.542769468  | 7.812261242  | 16.514952862 |
| C | 3.370419707  | 6.112390640  | 17.204095038 |
| H | 3.902174610  | 6.023292041  | 18.157461874 |
| H | 2.475863704  | 6.722198397  | 17.396739747 |
| C | 2.941966697  | 4.723456860  | 16.708156499 |
| H | 2.290558117  | 4.233934683  | 17.443253722 |
| H | 3.830417433  | 4.086120086  | 16.600239997 |
| C | 2.217540439  | 4.811556785  | 15.354708599 |
| H | 1.244871539  | 5.296379704  | 15.488762519 |
| H | 2.011480588  | 3.783673649  | 15.003368231 |
| C | 1.021956860  | 6.944199962  | 12.447544150 |
| H | 0.493358602  | 6.665919634  | 11.530329007 |
| C | 1.592693940  | 8.362843618  | 12.227067396 |
| H | 2.277426808  | 8.374682350  | 11.373311136 |
| H | 2.164226404  | 8.691459577  | 13.102269528 |
| C | 0.442275497  | 9.353323004  | 11.965070395 |
| H | 0.852940613  | 10.359047257 | 11.821558756 |
| H | -0.056106953 | 9.076867889  | 11.025508962 |
| C | -0.583047889 | 9.348711961  | 13.108759631 |
| H | -0.100008203 | 9.703594365  | 14.030511078 |
| H | -1.396611943 | 10.049924095 | 12.891956979 |
| C | -1.143438766 | 7.937478327  | 13.340311358 |
| H | -1.715120516 | 7.626262494  | 12.456787629 |
| H | -1.837119803 | 7.927607417  | 14.189388690 |
| C | -0.016237426 | 6.922215970  | 13.593001283 |
| H | -0.444046303 | 5.919158797  | 13.711556884 |
| H | 0.473830781  | 7.174349016  | 14.541636212 |
| O | 0.193944079  | 1.988850615  | 14.311931678 |
| H | 0.631523405  | 1.797223330  | 15.153401312 |
| C | -0.857237518 | 2.874513317  | 14.503682248 |
| C | -1.047319115 | 3.383079768  | 15.793545925 |
| C | -1.624807247 | 3.242667194  | 13.376399830 |
| C | -2.065401077 | 4.308995082  | 16.006909530 |
| C | -2.656321750 | 4.194697991  | 13.655948746 |
| C | -2.865002382 | 4.714043919  | 14.930122067 |
| H | -0.402383352 | 3.044433887  | 16.596043985 |
| H | -3.647411153 | 5.433147556  | 15.129263480 |
| O | -3.419881800 | 4.568151005  | 12.605581855 |
| C | -4.550794374 | 5.415711876  | 12.799668680 |
| H | -5.265211911 | 4.966960083  | 13.498688399 |
| H | -4.249214098 | 6.406242807  | 13.161214454 |
| H | -5.010448329 | 5.508918811  | 11.815609273 |
| O | -2.348818286 | 4.883377509  | 17.194124859 |
| C | -1.607940340 | 4.481551939  | 18.344892246 |

|   |              |             |              |
|---|--------------|-------------|--------------|
| H | -0.539880896 | 4.708238721 | 18.229155394 |
| H | -2.011877140 | 5.059192684 | 19.177100240 |
| H | -1.736862197 | 3.410855191 | 18.547674905 |
| H | -1.162201361 | 0.671472233 | 11.561033699 |
| O | -0.930430741 | 1.236941151 | 12.310515638 |
| C | -1.413755074 | 2.559552759 | 11.977354700 |
| C | -0.245653727 | 3.249229583 | 11.197202293 |
| C | -2.717014712 | 2.336026416 | 11.196516603 |
| C | -0.447136113 | 4.441067011 | 10.329790498 |
| C | -3.776289562 | 1.722839168 | 11.886054821 |
| C | -2.852436190 | 2.563656000 | 9.824415357  |
| C | -4.958086051 | 1.393478536 | 11.231570381 |
| H | -3.668554738 | 1.514623686 | 12.946712561 |
| C | -4.038905272 | 2.226232635 | 9.165109867  |
| H | -2.050054051 | 3.010699446 | 9.252682343  |
| C | -5.096870870 | 1.650989094 | 9.863904116  |
| H | -5.771174228 | 0.932661609 | 11.785415724 |
| H | -4.127916584 | 2.417312245 | 8.099272828  |
| H | -6.019139957 | 1.396069108 | 9.349545499  |
| C | 0.244584985  | 4.474884795 | 9.102159596  |
| C | -1.335452280 | 5.492141432 | 10.605996544 |
| C | 0.058497892  | 5.510127895 | 8.191299556  |
| H | 0.927714873  | 3.664236627 | 8.859728973  |
| C | -1.531820719 | 6.526352719 | 9.690837765  |
| H | -1.902278141 | 5.482421810 | 11.522637472 |
| C | -0.834868621 | 6.545677091 | 8.481561260  |
| H | 0.602302204  | 5.505065806 | 7.250718780  |
| H | -2.238909217 | 7.318516682 | 9.923423861  |
| H | -0.993579536 | 7.349004816 | 7.768260697  |
| H | 0.163255699  | 2.456360738 | 10.565497786 |

=====

**8**

=====

|    |             |             |              |
|----|-------------|-------------|--------------|
| Ru | 0.982346673 | 3.615954767 | 12.502822818 |
| P  | 2.258879220 | 5.600312437 | 12.694755195 |
| O  | 3.130433187 | 2.122150118 | 11.062285573 |
| C  | 2.346173942 | 2.746061821 | 11.650534101 |
| C  | 3.839483039 | 5.774461588 | 11.706626146 |
| H  | 4.179468207 | 6.799939019 | 11.896494425 |
| C  | 3.541888852 | 5.640822858 | 10.197155472 |
| H  | 2.758921366 | 6.342830955 | 9.892035389  |
| H  | 3.149381547 | 4.637731995 | 9.997377797  |
| C  | 4.808108604 | 5.858522215 | 9.354477558  |
| H  | 4.568520476 | 5.723904301 | 8.293216637  |
| H  | 5.150044626 | 6.896969925 | 9.470337594  |
| C  | 5.926132407 | 4.899487726 | 9.784879751  |
| H  | 6.829321933 | 5.073265216 | 9.189522017  |
| H  | 5.611323967 | 3.864693958 | 9.588845326  |
| C  | 6.236936484 | 5.060529122 | 11.279305478 |
| H  | 6.628711821 | 6.071226797 | 11.462187646 |
| H  | 7.020642421 | 4.359745495 | 11.588110795 |
| C  | 4.985783249 | 4.839163652 | 12.150398120 |
| H  | 4.679969143 | 3.791356757 | 12.072946702 |
| H  | 5.245093935 | 5.021840177 | 13.198834603 |
| C  | 2.838792013 | 5.620535817 | 14.480538683 |
| H  | 3.615095650 | 4.843175800 | 14.468456256 |
| C  | 3.496048267 | 6.929555181 | 14.960834724 |
| H  | 4.279163408 | 7.244038678 | 14.261783664 |
| H  | 2.746093708 | 7.730097665 | 14.979344415 |
| C  | 4.083983772 | 6.758804896 | 16.372890279 |
| H  | 4.902289054 | 6.025947124 | 16.335984683 |
| H  | 4.524538074 | 7.704759069 | 16.706517737 |
| C  | 3.015788515 | 6.281610459 | 17.368476981 |
| H  | 3.455805571 | 6.141231718 | 18.361596003 |
| H  | 2.244477462 | 7.058407174 | 17.473100734 |
| C  | 2.359724892 | 4.976331806 | 16.894313878 |
| H  | 1.576574615 | 4.659235191 | 17.592566490 |

|   |              |              |              |
|---|--------------|--------------|--------------|
| H | 3.110639276  | 4.174267898  | 16.878565760 |
| C | 1.768165193  | 5.125863483  | 15.481691789 |
| H | 0.930954957  | 5.837566291  | 15.516553512 |
| H | 1.366703818  | 4.152324421  | 15.160067175 |
| C | 1.288779423  | 7.160918896  | 12.278029544 |
| H | 0.810862334  | 6.882932077  | 11.331737885 |
| C | 2.119043229  | 8.438880653  | 12.018176693 |
| H | 2.876784302  | 8.261989786  | 11.250229602 |
| H | 2.649662539  | 8.739974715  | 12.929349970 |
| C | 1.203944640  | 9.586038629  | 11.552451948 |
| H | 1.808252522  | 10.482938388 | 11.375427531 |
| H | 0.755329256  | 9.310210405  | 10.587638599 |
| C | 0.090530883  | 9.877432602  | 12.567275738 |
| H | 0.537760690  | 10.231114556 | 13.507405737 |
| H | -0.555996526 | 10.684069990 | 12.204049175 |
| C | -0.734456583 | 8.613157995  | 12.838774488 |
| H | -1.260314908 | 8.317676292  | 11.923180048 |
| H | -1.501370217 | 8.803197464  | 13.599527900 |
| C | 0.160340188  | 7.448088349  | 13.293261692 |
| H | -0.457924699 | 6.557585376  | 13.428291935 |
| H | 0.598046495  | 7.697692209  | 14.268147376 |
| O | -0.841061378 | 4.225124305  | 13.654366435 |
| H | -0.779354493 | 4.803439934  | 14.425383337 |
| C | -2.133950531 | 4.244174221  | 13.129178806 |
| C | -3.082159752 | 5.004372123  | 13.810207891 |
| C | -2.375308092 | 3.550516236  | 11.939726250 |
| C | -4.364650730 | 5.108510783  | 13.262336709 |
| C | -3.672350786 | 3.744892180  | 11.379765689 |
| C | -4.649292803 | 4.487943346  | 12.041960044 |
| H | -2.813989735 | 5.496660954  | 14.737756910 |
| H | -5.638061644 | 4.624967270  | 11.626523902 |
| O | -3.880456767 | 3.217802042  | 10.156211609 |
| C | -5.166864944 | 3.299468559  | 9.546781950  |
| H | -5.933711038 | 2.822077622  | 10.167738085 |
| H | -5.448166272 | 4.340318098  | 9.346936653  |
| H | -5.071332211 | 2.759119876  | 8.604546253  |
| O | -5.379926150 | 5.804325488  | 13.817907123 |
| C | -5.158253309 | 6.473984914  | 15.056900079 |
| H | -4.380590989 | 7.242843243  | 14.961087930 |
| H | -6.105505936 | 6.949475931  | 15.312033900 |
| H | -4.881920544 | 5.766925472  | 15.849097629 |
| H | -0.239955980 | 1.179159354  | 11.977938303 |
| O | -0.544780003 | 2.019282125  | 12.356194647 |
| C | -1.265177288 | 2.758107460  | 11.243553046 |
| C | -0.101697786 | 3.606939402  | 10.672848712 |
| C | -1.749162294 | 1.673816876  | 10.284489958 |
| C | -0.318948298 | 4.870739955  | 9.917313519  |
| C | -2.410106701 | 0.556356821  | 10.814590494 |
| C | -1.525872913 | 1.746652772  | 8.905723896  |
| C | -2.829493621 | -0.477322063 | 9.978613948  |
| H | -2.611282979 | 0.509200353  | 11.881331302 |
| C | -1.955118291 | 0.715650130  | 8.070614470  |
| H | -1.050312850 | 2.619069246  | 8.471438383  |
| C | -2.602455466 | -0.400400341 | 8.603245978  |
| H | -3.338585598 | -1.339130534 | 10.400186218 |
| H | -1.781165673 | 0.785187944  | 7.000615866  |
| H | -2.929532243 | -1.204252197 | 7.950255847  |
| C | 0.477251451  | 5.063082822  | 8.769251745  |
| C | -1.248522573 | 5.878795244  | 10.236798001 |
| C | 0.361755824  | 6.202583899  | 7.978774413  |
| H | 1.197709986  | 4.296489426  | 8.495495718  |
| C | -1.378385826 | 7.012121070  | 9.433676313  |
| H | -1.875041105 | 5.790272013  | 11.112124430 |
| C | -0.573356335 | 7.186706462  | 8.306996873  |
| H | 0.992027487  | 6.316462196  | 7.101421679  |
| H | -2.117023713 | 7.765432519  | 9.693022963  |
| H | -0.679436035 | 8.072482895  | 7.687698032  |
| H | 0.477093583  | 2.940188690  | 10.034058547 |

8-TS

|    |              |              |              |
|----|--------------|--------------|--------------|
| Ru | 0.941331155  | 3.676764206  | 12.409868356 |
| P  | 2.297686994  | 5.679442055  | 12.590684882 |
| O  | 2.945442262  | 2.124913865  | 10.834428423 |
| C  | 2.228503014  | 2.749432445  | 11.500496284 |
| C  | 3.993241370  | 5.670659116  | 11.775274707 |
| H  | 4.447278536  | 6.640835899  | 12.009858614 |
| C  | 3.848101100  | 5.570801185  | 10.240220344 |
| H  | 3.216435631  | 6.382915247  | 9.862607687  |
| H  | 3.337749667  | 4.633909471  | 9.989533069  |
| C  | 5.215859231  | 5.591508491  | 9.539282844  |
| H  | 5.074553393  | 5.497766136  | 8.456276062  |
| H  | 5.700161267  | 6.563266842  | 9.710561825  |
| C  | 6.118618061  | 4.469694063  | 10.068344100 |
| H  | 7.093096312  | 4.492940531  | 9.568419025  |
| H  | 5.663325781  | 3.497594689  | 9.833878046  |
| C  | 6.296405210  | 4.595476408  | 11.587107356 |
| H  | 6.823938740  | 5.532632345  | 11.813178333 |
| H  | 6.922219350  | 3.783097797  | 11.972386837 |
| C  | 4.945812683  | 4.585121951  | 12.326194702 |
| H  | 4.493507816  | 3.593772278  | 12.225458561 |
| H  | 5.128058606  | 4.743280479  | 13.394375738 |
| C  | 2.732272966  | 5.684474885  | 14.428936248 |
| H  | 3.397795792  | 4.814274443  | 14.485439039 |
| C  | 3.520175867  | 6.898638245  | 14.953911153 |
| H  | 4.369385357  | 7.119742874  | 14.299035211 |
| H  | 2.875085018  | 7.785181989  | 14.944960748 |
| C  | 4.013543402  | 6.651619406  | 16.390433119 |
| H  | 4.734071790  | 5.823484073  | 16.383104125 |
| H  | 4.552602643  | 7.531787718  | 16.754634878 |
| C  | 2.850922492  | 6.309682944  | 17.332165531 |
| H  | 3.225021640  | 6.096939860  | 18.339016997 |
| H  | 2.188680654  | 7.181172149  | 17.421311000 |
| C  | 2.043619630  | 5.114152117  | 16.808222913 |
| H  | 1.191178892  | 4.908044187  | 17.464715627 |
| H  | 2.672511982  | 4.215286126  | 16.819800447 |
| C  | 1.551630954  | 5.351276241  | 15.369500682 |
| H  | 0.825898358  | 6.174785700  | 15.372696040 |
| H  | 1.029805400  | 4.448073727  | 15.023968049 |
| C  | 1.568758669  | 7.358573772  | 12.117237568 |
| H  | 1.116398241  | 7.157935009  | 11.143339938 |
| C  | 2.581471597  | 8.509266841  | 11.924633288 |
| H  | 3.333783826  | 8.232396507  | 11.182031641 |
| H  | 3.116161870  | 8.710299761  | 12.859367333 |
| C  | 1.874207662  | 9.794069020  | 11.459339941 |
| H  | 2.612236797  | 10.592621045 | 11.329966966 |
| H  | 1.423155850  | 9.615659614  | 10.474669017 |
| C  | 0.782299866  | 10.218804827 | 12.446809354 |
| H  | 1.239488088  | 10.452798185 | 13.417373376 |
| H  | 0.288554345  | 11.134677738 | 12.104031639 |
| C  | -0.243241975 | 9.093097849  | 12.614995244 |
| H  | -0.752881353 | 8.922694944  | 11.661401817 |
| H  | -1.011193132 | 9.374437953  | 13.344417674 |
| C  | 0.426940276  | 7.783399604  | 13.064415572 |
| H  | -0.330173161 | 6.993184940  | 13.100856521 |
| H  | 0.818282255  | 7.920617422  | 14.078176165 |
| O  | -0.941489925 | 4.610292700  | 13.288261180 |
| H  | -0.891629350 | 5.288701793  | 13.975048572 |
| C  | -2.247946174 | 4.325156838  | 12.953241854 |
| C  | -3.250304684 | 4.878875377  | 13.728297474 |
| C  | -2.476822632 | 3.445318508  | 11.858257130 |
| C  | -4.587395702 | 4.553747049  | 13.433694702 |
| C  | -3.864475117 | 3.104007783  | 11.631668507 |
| C  | -4.882838972 | 3.663242529  | 12.397707043 |
| H  | -2.995260795 | 5.526038039  | 14.558684626 |

|   |              |              |              |
|---|--------------|--------------|--------------|
| H | -5.924196393 | 3.437539114  | 12.212006492 |
| O | -4.121193230 | 2.281211204  | 10.610200336 |
| C | -5.465524102 | 1.915255451  | 10.285495132 |
| H | -5.946109173 | 1.400910020  | 11.123407424 |
| H | -6.054204316 | 2.792610885  | 9.995164332  |
| H | -5.373800552 | 1.235141382  | 9.439757598  |
| O | -5.643700535 | 5.039217406  | 14.100619889 |
| C | -5.443642154 | 5.998164127  | 15.144764753 |
| H | -4.943551080 | 6.896272265  | 14.762841959 |
| H | -6.441513492 | 6.258511322  | 15.497363274 |
| H | -4.865775293 | 5.568933585  | 15.971679389 |
| H | -0.739769753 | 2.109476071  | 13.470445429 |
| O | -0.145478642 | 1.939433339  | 12.724598733 |
| C | -1.411276530 | 2.997602138  | 10.981602887 |
| C | -0.236259015 | 3.823844275  | 10.610994473 |
| C | -1.575511286 | 1.798468730  | 10.135782155 |
| C | -0.416070181 | 5.210853209  | 10.063853580 |
| C | -1.704790976 | 0.502140850  | 10.654228004 |
| C | -1.627191419 | 2.001891390  | 8.745317607  |
| C | -1.874709596 | -0.573297591 | 9.787510455  |
| H | -1.598468855 | 0.355986418  | 11.722087638 |
| C | -1.856122461 | 0.926087864  | 7.889570083  |
| H | -1.539734222 | 3.006971398  | 8.345027780  |
| C | -1.965827454 | -0.364198389 | 8.407027832  |
| H | -1.926650272 | -1.583705155 | 10.185382180 |
| H | -1.926654121 | 1.093599117  | 6.819343513  |
| H | -2.109892838 | -1.208716460 | 7.738275917  |
| C | 0.524922261  | 5.611982667  | 9.094594915  |
| C | -1.466370711 | 6.096430467  | 10.354726254 |
| C | 0.436171266  | 6.846292806  | 8.457285322  |
| H | 1.335395143  | 4.936303327  | 8.839909681  |
| C | -1.566732341 | 7.326835563  | 9.701703395  |
| H | -2.237978769 | 5.827306245  | 11.063368640 |
| C | -0.616604285 | 7.714798676  | 8.757376684  |
| H | 1.180327515  | 7.123217418  | 7.716112323  |
| H | -2.402056844 | 7.983120794  | 9.931024875  |
| H | -0.701893666 | 8.672829919  | 8.253145334  |
| H | 0.342704667  | 3.254722899  | 9.888701484  |

=====

9

=====

|    |             |             |              |
|----|-------------|-------------|--------------|
| Ru | 0.780467612 | 3.224697399 | 12.419606616 |
| P  | 1.956232658 | 5.300471696 | 12.613062480 |
| O  | 2.796937825 | 1.791197193 | 10.736933141 |
| C  | 2.059321674 | 2.419971830 | 11.371641236 |
| C  | 3.577556474 | 5.376005164 | 11.680614722 |
| H  | 3.949912610 | 6.394140283 | 11.850349220 |
| C  | 3.384625911 | 5.207627790 | 10.155403518 |
| H  | 2.671259772 | 5.945449803 | 9.770425809  |
| H  | 2.959032976 | 4.222931983 | 9.938307531  |
| C  | 4.725500142 | 5.338499575 | 9.411797348  |
| H  | 4.564942072 | 5.186833179 | 8.338220252  |
| H  | 5.108170956 | 6.362255094 | 9.531540820  |
| C  | 5.758760554 | 4.339895817 | 9.953176969  |
| H  | 6.710461447 | 4.452598008 | 9.422105206  |
| H  | 5.407812949 | 3.315824544 | 9.762348472  |
| C  | 5.965234238 | 4.534105720 | 11.462024535 |
| H  | 6.395384126 | 5.529325964 | 11.644307071 |
| H  | 6.686046038 | 3.805598616 | 11.850139267 |
| C  | 4.643050405 | 4.406267568 | 12.239814270 |
| H  | 4.285743098 | 3.373394651 | 12.177948658 |
| H  | 4.823451617 | 4.610282820 | 13.300080992 |
| C  | 2.430792495 | 5.622075081 | 14.396903074 |
| H  | 3.078303202 | 4.755542887 | 14.581507673 |
| C  | 3.238867422 | 6.919384274 | 14.623188480 |
| H  | 4.058733605 | 7.016924162 | 13.903731675 |
| H  | 2.581801530 | 7.788007222 | 14.480564643 |

|   |              |              |              |
|---|--------------|--------------|--------------|
| C | 3.807636440  | 6.951255868  | 16.054178265 |
| H | 4.525749407  | 6.126459118  | 16.170024640 |
| H | 4.368900145  | 7.881003503  | 16.206114515 |
| C | 2.695292489  | 6.812220158  | 17.104074266 |
| H | 3.125339239  | 6.796781660  | 18.112107029 |
| H | 2.040899465  | 7.695402447  | 17.054081589 |
| C | 1.859516620  | 5.547964770  | 16.855823014 |
| H | 1.038747643  | 5.481104162  | 17.581147871 |
| H | 2.484686608  | 4.656327777  | 17.007886728 |
| C | 1.284921759  | 5.509234973  | 15.428952201 |
| H | 0.577839162  | 6.338703022  | 15.304478054 |
| H | 0.741321008  | 4.577862919  | 15.282718222 |
| C | 0.955098678  | 6.722179586  | 11.883490837 |
| H | 0.588593973  | 6.289935203  | 10.937315116 |
| C | 1.750641570  | 8.009409879  | 11.541323415 |
| H | 2.630510458  | 7.791967913  | 10.927910790 |
| H | 2.117203401  | 8.470447126  | 12.468565050 |
| C | 0.854769733  | 9.011410221  | 10.788206472 |
| H | 1.430783202  | 9.919666215  | 10.569231347 |
| H | 0.572860448  | 8.577041055  | 9.815701456  |
| C | -0.415316512 | 9.355816430  | 11.582082751 |
| H | -0.133911779 | 9.896514434  | 12.499864700 |
| H | -1.053583810 | 10.032021163 | 11.001578146 |
| C | -1.189262427 | 8.082446661  | 11.967004534 |
| H | -1.568841261 | 7.589361137  | 11.057386740 |
| H | -2.064896838 | 8.331786063  | 12.581659438 |
| C | -0.283766954 | 7.101863729  | 12.732360455 |
| H | -0.853261438 | 6.214882809  | 13.044783436 |
| H | 0.057380514  | 7.584716702  | 13.663732390 |
| O | -0.891337539 | 3.910461504  | 13.729342579 |
| H | -1.573756151 | 4.303371755  | 13.150361007 |
| C | -1.536132043 | 2.916601440  | 14.497292070 |
| C | -2.152577844 | 3.356576869  | 15.659273744 |
| C | -1.536573506 | 1.593614229  | 14.052123604 |
| C | -2.840831127 | 2.416688416  | 16.437194810 |
| C | -2.289482879 | 0.675515566  | 14.843901006 |
| C | -2.920674201 | 1.081577322  | 16.016396436 |
| H | -2.059583948 | 4.398213034  | 15.934699219 |
| H | -3.487350734 | 0.393048959  | 16.628828174 |
| O | -2.361430412 | -0.581627188 | 14.354210299 |
| C | -2.949101540 | -1.611458001 | 15.149736044 |
| H | -2.444500285 | -1.697809411 | 16.119097388 |
| H | -4.019735977 | -1.433259109 | 15.304474661 |
| H | -2.811945695 | -2.532259682 | 14.582551430 |
| O | -3.467459065 | 2.699743398  | 17.598750220 |
| C | -3.411359094 | 4.034308734  | 18.101699366 |
| H | -3.888008045 | 4.741030286  | 17.410994100 |
| H | -3.962310274 | 4.020515124  | 19.042304378 |
| H | -2.376059846 | 4.345301707  | 18.289140744 |
| H | 2.049565353  | 1.832947883  | 14.034215064 |
| O | 1.699931191  | 2.731038499  | 14.130583326 |
| C | -0.737501440 | 1.090448100  | 12.898974492 |
| C | -0.746639181 | 1.604692075  | 11.610218635 |
| C | 0.126006506  | -0.092741644 | 13.163240952 |
| C | -1.449242888 | 2.770971879  | 11.055402669 |
| C | 0.774371073  | -0.211257387 | 14.406413013 |
| C | 0.350606256  | -1.078298857 | 12.188197289 |
| C | 1.651649041  | -1.266585486 | 14.649066239 |
| H | 0.595004135  | 0.535841999  | 15.172351282 |
| C | 1.221322137  | -2.136083141 | 12.437500854 |
| H | -0.184389543 | -1.041237091 | 11.243920438 |
| C | 1.882330693  | -2.229680765 | 13.664702530 |
| H | 2.153107381  | -1.338152112 | 15.609911886 |
| H | 1.375192424  | -2.895120895 | 11.676163213 |
| H | 2.561823140  | -3.054886251 | 13.855993253 |
| C | -0.792065587 | 3.481195996  | 10.018642081 |
| C | -2.690052884 | 3.269492257  | 11.525981017 |
| C | -1.333098029 | 4.672341826  | 9.511020157  |

|   |              |             |              |
|---|--------------|-------------|--------------|
| H | 0.095637994  | 3.059817348 | 9.555628364  |
| C | -3.219322165 | 4.443607356 | 11.004160571 |
| H | -3.233679484 | 2.709717956 | 12.279082605 |
| C | -2.536831880 | 5.159470658 | 10.005026034 |
| H | -0.815059800 | 5.196382122 | 8.713402506  |
| H | -4.180295826 | 4.801959391 | 11.362109146 |
| H | -2.964761586 | 6.072531777 | 9.603386026  |
| H | -0.151907243 | 1.063785600 | 10.880093628 |

---



---

10

---



---

|    |              |              |              |
|----|--------------|--------------|--------------|
| Ru | 2.001515228  | 5.283245665  | 10.460261725 |
| P  | 3.367233064  | 6.267247034  | 12.040292541 |
| O  | 2.710378435  | 7.349072439  | 8.345772751  |
| C  | 2.511533038  | 6.599019514  | 9.209618343  |
| C  | 4.905098261  | 7.276620837  | 11.714327692 |
| H  | 5.275154798  | 7.533749659  | 12.716291729 |
| C  | 4.678747972  | 8.603876630  | 10.958229846 |
| H  | 3.971610314  | 9.243504561  | 11.496080133 |
| H  | 4.251028631  | 8.408040925  | 9.970537416  |
| C  | 6.010925963  | 9.357765213  | 10.784789563 |
| H  | 5.830241509  | 10.287463608 | 10.234372317 |
| H  | 6.394872554  | 9.647033202  | 11.773109187 |
| C  | 7.057503649  | 8.498523990  | 10.061373046 |
| H  | 8.000296202  | 9.047652837  | 9.965023610  |
| H  | 6.709129258  | 8.286851722  | 9.040306363  |
| C  | 7.284455447  | 7.173476539  | 10.802276640 |
| H  | 7.737720388  | 7.373902619  | 11.783286910 |
| H  | 7.987114079  | 6.538157350  | 10.250270171 |
| C  | 5.962656046  | 6.415459051  | 10.997667647 |
| H  | 5.560598720  | 6.132616755  | 10.018585636 |
| H  | 6.140076118  | 5.484410533  | 11.548815686 |
| C  | 3.881189030  | 4.993682242  | 13.318197587 |
| H  | 4.422102361  | 4.262956678  | 12.700308064 |
| C  | 4.858332122  | 5.490628371  | 14.408990156 |
| H  | 5.736493682  | 5.970125519  | 13.965575928 |
| H  | 4.362694719  | 6.243013646  | 15.033880954 |
| C  | 5.322491404  | 4.313741635  | 15.287858018 |
| H  | 5.916517922  | 3.624023925  | 14.669263776 |
| H  | 5.993647861  | 4.685956232  | 16.069749365 |
| C  | 4.141880933  | 3.551897822  | 15.905226708 |
| H  | 4.503886350  | 2.699164249  | 16.489881973 |
| H  | 3.611543134  | 4.211084114  | 16.606374460 |
| C  | 3.161364375  | 3.086588348  | 14.820562717 |
| H  | 2.299775927  | 2.577520996  | 15.265971235 |
| H  | 3.660584282  | 2.344248303  | 14.176281432 |
| C  | 2.678195141  | 4.260870835  | 13.954912188 |
| H  | 2.123875992  | 4.960023187  | 14.593008626 |
| H  | 1.983152954  | 3.909957076  | 13.189069574 |
| C  | 2.082925243  | 7.453532813  | 12.687894972 |
| H  | 2.208378996  | 8.318540383  | 12.024383019 |
| C  | 2.193821105  | 7.954400154  | 14.138493610 |
| H  | 3.178714757  | 8.404128936  | 14.311935882 |
| H  | 2.099176111  | 7.110623812  | 14.831898623 |
| C  | 1.079012148  | 8.976454518  | 14.429631874 |
| H  | 1.138030096  | 9.298111981  | 15.475074838 |
| H  | 1.243473344  | 9.872322908  | 13.814840884 |
| C  | -0.312318558 | 8.396803378  | 14.124864385 |
| H  | -0.513912708 | 7.556612902  | 14.803889977 |
| H  | -1.085421003 | 9.148261578  | 14.317528403 |
| C  | -0.416628767 | 7.905755178  | 12.670106666 |
| H  | -0.305361060 | 8.756624529  | 11.984479014 |
| H  | -1.400141502 | 7.464432877  | 12.478883495 |
| C  | 0.683568930  | 6.870537567  | 12.382035714 |
| H  | 0.589350888  | 6.597983920  | 11.295646755 |
| H  | 0.497526047  | 5.955261119  | 12.950838758 |
| H  | 1.061919285  | 3.011233100  | 11.203184155 |



|   |             |             |              |
|---|-------------|-------------|--------------|
| O | 0.800724666 | 3.943024434 | 11.190831417 |
| O | 3.118716460 | 2.181251351 | 11.245071795 |
| H | 3.713614069 | 1.751360840 | 11.875976420 |
| C | 3.803148058 | 2.909135997 | 10.344325176 |
| C | 5.186317674 | 2.975425538 | 10.348915009 |
| C | 3.005232573 | 3.595071467 | 9.358001830  |
| C | 5.827431336 | 3.635781141 | 9.280379713  |
| H | 5.753586134 | 2.497425810 | 11.137874698 |
| C | 3.728913814 | 4.129704944 | 8.214056133  |
| H | 2.062667684 | 3.110999316 | 9.103539645  |
| C | 5.108883919 | 4.201700974 | 8.206454808  |
| O | 7.151959567 | 3.778351494 | 9.194823871  |
| O | 2.938397809 | 4.526039788 | 7.218283215  |
| H | 5.674092159 | 4.645976843 | 7.398971431  |
| C | 8.008214133 | 3.215259098 | 10.199476192 |
| C | 3.516057326 | 5.184084070 | 6.077657139  |
| H | 4.016761721 | 6.106308286 | 6.387047722  |
| H | 4.214758471 | 4.518949709 | 5.560291890  |
| H | 2.677149041 | 5.421300699 | 5.425525123  |
| H | 7.899054155 | 2.126660149 | 10.241517274 |
| H | 9.021532494 | 3.469601021 | 9.891812054  |
| H | 7.799823289 | 3.656370481 | 11.180096549 |

=====

### 10-TS

=====

|    |             |              |              |
|----|-------------|--------------|--------------|
| Ru | 1.986903397 | 5.056606196  | 10.560456833 |
| P  | 3.158596230 | 6.346506723  | 12.178240371 |
| O  | 1.018458558 | 7.494973121  | 9.154805519  |
| C  | 1.409410078 | 6.557968514  | 9.708845416  |
| C  | 4.543314983 | 7.474071074  | 11.628703997 |
| H  | 4.812178882 | 8.090882513  | 12.497545834 |
| C  | 4.081956059 | 8.408901543  | 10.488411987 |
| H  | 3.217620772 | 9.007368797  | 10.796016748 |
| H  | 3.757793893 | 7.798767451  | 9.636974025  |
| C  | 5.219624290 | 9.335189700  | 10.029295030 |
| H  | 4.864505820 | 9.972012560  | 9.211106522  |
| H  | 5.500345910 | 10.007547730 | 10.851571645 |
| C  | 6.447315576 | 8.525295635  | 9.591235068  |
| H  | 7.258521343 | 9.193354883  | 9.282120581  |
| H  | 6.185914425 | 7.917385911  | 8.712027248  |
| C  | 6.918993906 | 7.593340840  | 10.714839236 |
| H  | 7.274905581 | 8.195000835  | 11.562552488 |
| H  | 7.769660377 | 6.987077381  | 10.381247474 |
| C  | 5.786493529 | 6.668593855  | 11.190297185 |
| H  | 5.502399411 | 6.001666991  | 10.370225789 |
| H  | 6.153921742 | 6.033160611  | 12.001880052 |
| C  | 3.940883071 | 5.176612085  | 13.412633243 |
| H  | 4.576333346 | 4.564950525  | 12.754840622 |
| C  | 4.850653443 | 5.787925176  | 14.500759874 |
| H  | 5.579741041 | 6.480210554  | 14.068709433 |
| H  | 4.244979264 | 6.369966215  | 15.202941237 |
| C  | 5.578833977 | 4.669155655  | 15.267729353 |
| H  | 6.254384348 | 4.141705621  | 14.578131166 |
| H  | 6.210307808 | 5.106396189  | 16.049015839 |
| C  | 4.587280124 | 3.667903859  | 15.879909847 |
| H  | 5.125544181 | 2.858388055  | 16.384971655 |
| H  | 3.992732407 | 4.176624636  | 16.651484654 |
| C  | 3.636124267 | 3.093998592  | 14.818660357 |
| H  | 2.903013767 | 2.423689107  | 15.281156727 |
| H  | 4.212027148 | 2.486270200  | 14.102886865 |
| C  | 2.914741062 | 4.216391170  | 14.054462097 |
| H  | 2.280417141 | 4.774378133  | 14.753872301 |
| H  | 2.245015437 | 3.786418534  | 13.297741113 |
| C  | 1.894271501 | 7.455980857  | 12.997474092 |
| H  | 1.737957294 | 8.225128627  | 12.226428201 |
| C  | 2.303215450 | 8.169182264  | 14.300117826 |
| H  | 3.263371728 | 8.684235963  | 14.181975082 |

|   |              |             |              |
|---|--------------|-------------|--------------|
| H | 2.434654844  | 7.422731305 | 15.093357604 |
| C | 1.212362883  | 9.165404588 | 14.733414566 |
| H | 1.508329776  | 9.652886142 | 15.668960506 |
| H | 1.128662127  | 9.958731362 | 13.977491585 |
| C | -0.146835962 | 8.467716823 | 14.898429405 |
| H | -0.086001456 | 7.751712765 | 15.730490892 |
| H | -0.917825933 | 9.196973780 | 15.169529024 |
| C | -0.554700460 | 7.720644624 | 13.618289608 |
| H | -0.726131344 | 8.443989648 | 12.809215702 |
| H | -1.499051136 | 7.186070745 | 13.768908567 |
| C | 0.538846227  | 6.731166840 | 13.180597963 |
| H | 0.228044343  | 6.237294438 | 12.243899055 |
| H | 0.636428455  | 5.941590765 | 13.934765474 |
| H | 0.934563143  | 2.876873907 | 9.692941801  |
| O | 0.940163963  | 3.766220923 | 9.304662735  |
| O | 3.454499357  | 2.981951631 | 10.877738384 |
| H | 3.832652615  | 2.184023260 | 11.273812286 |
| C | 4.198021109  | 3.504654171 | 9.856775470  |
| C | 5.510549938  | 3.184893677 | 9.601054234  |
| C | 3.444788424  | 4.468975495 | 9.120807257  |
| C | 6.139009356  | 3.891817494 | 8.543801586  |
| H | 6.040764954  | 2.448837088 | 10.192200051 |
| C | 4.161907573  | 5.226908498 | 8.127739257  |
| H | 2.435211033  | 3.998091586 | 8.745268524  |
| C | 5.477255776  | 4.908997479 | 7.821561804  |
| O | 7.398654153  | 3.673240955 | 8.166268413  |
| O | 3.442660740  | 6.177035863 | 7.532517136  |
| H | 6.037937681  | 5.412887399 | 7.045631231  |
| C | 8.176151933  | 2.642791316 | 8.795369977  |
| C | 3.996663047  | 6.901902553 | 6.422563009  |
| H | 4.870149288  | 7.482177203 | 6.737349657  |
| H | 4.267939399  | 6.217934496 | 5.612016704  |
| H | 3.205002524  | 7.573527993 | 6.093792065  |
| H | 7.699686394  | 1.664557022 | 8.671716155  |
| H | 9.135833372  | 2.649697902 | 8.280377234  |
| H | 8.327508115  | 2.861085142 | 9.857895614  |

=====  
**2b**  
=====

|   |              |              |              |
|---|--------------|--------------|--------------|
| O | -2.144560860 | 0.395493545  | 9.574987276  |
| H | -2.309296593 | -0.555346776 | 9.560063123  |
| C | -1.064189664 | 0.678826493  | 8.788755648  |
| C | -0.316867497 | -0.349885193 | 8.195755393  |
| C | -0.730071515 | 2.029952268  | 8.635890312  |
| C | 0.796664627  | -0.012072896 | 7.426449985  |
| C | 0.398923533  | 2.333176734  | 7.836611286  |
| C | 1.161330189  | 1.328791733  | 7.244480901  |
| H | -0.609595190 | -1.381336288 | 8.355444192  |
| H | 2.028458042  | 1.542291298  | 6.634633887  |
| O | 0.676760657  | 3.655946484  | 7.697244759  |
| C | 1.910055822  | 4.035079853  | 7.108104474  |
| H | 2.759488104  | 3.600124502  | 7.649931329  |
| H | 1.965240895  | 3.743421677  | 6.050816682  |
| H | 1.952942926  | 5.122743169  | 7.183495206  |
| O | 1.604291529  | -0.918063474 | 6.803992175  |
| C | 1.299879982  | -2.296954921 | 6.940978970  |
| H | 0.310112006  | -2.537458505 | 6.529938211  |
| H | 2.062535937  | -2.832887603 | 6.373264627  |
| H | 1.339621694  | -2.618904640 | 7.990439269  |
| C | -1.556813126 | 3.092169674  | 9.268378401  |
| C | -1.061647865 | 4.019610081  | 10.123637832 |
| C | -2.983396233 | 3.160309133  | 8.852781417  |
| C | 0.288501635  | 4.151895624  | 10.686508856 |
| C | -3.358270077 | 2.825015618  | 7.540142570  |
| C | -3.988463106 | 3.568905782  | 9.744513973  |
| C | -4.684525309 | 2.924945479  | 7.125686691  |
| H | -2.595245254 | 2.493238354  | 6.842360368  |

|   |              |             |              |
|---|--------------|-------------|--------------|
| C | -5.315640375 | 3.666856535 | 9.331449466  |
| H | -3.726309042 | 3.780701935 | 10.776793085 |
| C | -5.670807013 | 3.349045231 | 8.018568095  |
| H | -4.948895225 | 2.672367405 | 6.102057386  |
| H | -6.077588301 | 3.977423304 | 10.041389582 |
| H | -6.706354078 | 3.421113373 | 7.697941669  |
| C | 0.727979483  | 5.436472173 | 11.061955419 |
| C | 1.167410811  | 3.072631984 | 10.896720144 |
| C | 2.003169976  | 5.644780996 | 11.583311975 |
| H | 0.058178639  | 6.282252267 | 10.926352278 |
| C | 2.439714897  | 3.279649661 | 11.422817565 |
| H | 0.845523719  | 2.068017822 | 10.650587912 |
| C | 2.870543703  | 4.565775291 | 11.762383044 |
| H | 2.317986321  | 6.649521215 | 11.852660118 |
| H | 3.098453575  | 2.428957591 | 11.575911766 |
| H | 3.864543506  | 4.722243570 | 12.171385743 |
| H | -1.735272990 | 4.828449146 | 10.400479406 |

=====  
**11**  
=====

|    |              |              |              |
|----|--------------|--------------|--------------|
| Ru | 0.912339376  | 4.070648984  | 11.394615085 |
| P  | 2.259766679  | 5.619321999  | 12.864925552 |
| O  | 3.231802975  | 3.234400128  | 9.705770896  |
| C  | 2.355789814  | 3.601434369  | 10.383906651 |
| C  | 4.112292302  | 5.570717729  | 12.549671172 |
| H  | 4.573719426  | 6.232921682  | 13.292087872 |
| C  | 4.506350789  | 6.117894966  | 11.159274511 |
| H  | 4.198393454  | 7.164481383  | 11.062258686 |
| H  | 3.989717232  | 5.563730514  | 10.370140690 |
| C  | 6.026023492  | 6.013926879  | 10.936012947 |
| H  | 6.272256988  | 6.371104444  | 9.929262899  |
| H  | 6.541491530  | 6.682475399  | 11.640597473 |
| C  | 6.531670843  | 4.578038425  | 11.137798764 |
| H  | 7.614921331  | 4.530747823  | 10.978116073 |
| H  | 6.069327943  | 3.922974160  | 10.386094045 |
| C  | 6.174448634  | 4.066109230  | 12.540689376 |
| H  | 6.700826690  | 4.669028775  | 13.294839757 |
| H  | 6.507310695  | 3.029460282  | 12.673481230 |
| C  | 4.659910206  | 4.146198381  | 12.782981069 |
| H  | 4.158024825  | 3.445153285  | 12.111041416 |
| H  | 4.425629636  | 3.811415841  | 13.800048755 |
| C  | 2.169110631  | 5.328280832  | 14.735125685 |
| H  | 2.213177397  | 4.235110677  | 14.772736858 |
| C  | 3.327432207  | 5.846192118  | 15.617158052 |
| H  | 4.299828419  | 5.553369473  | 15.214086367 |
| H  | 3.315320536  | 6.942309091  | 15.644190551 |
| C  | 3.195396492  | 5.293056862  | 17.048575238 |
| H  | 3.308342754  | 4.197494939  | 17.017408686 |
| H  | 4.015125137  | 5.669845062  | 17.670622246 |
| C  | 1.840825443  | 5.643977703  | 17.680272897 |
| H  | 1.754326119  | 5.199547963  | 18.678130843 |
| H  | 1.778780710  | 6.732799475  | 17.815225415 |
| C  | 0.677335448  | 5.192794984  | 16.786533215 |
| H  | -0.284478840 | 5.496578389  | 17.216034976 |
| H  | 0.665097112  | 4.088770480  | 16.755441262 |
| C  | 0.825468210  | 5.754796692  | 15.363760765 |
| H  | 0.789719799  | 6.848803331  | 15.423209414 |
| H  | -0.021816459 | 5.460841839  | 14.738822328 |
| C  | 1.821292094  | 7.415192216  | 12.513936983 |
| H  | 2.046179542  | 7.476895850  | 11.438367988 |
| C  | 2.669940289  | 8.478139762  | 13.243576282 |
| H  | 3.740525048  | 8.265419537  | 13.158065682 |
| H  | 2.426488943  | 8.459052023  | 14.314210823 |
| C  | 2.375910773  | 9.883735210  | 12.687039531 |
| H  | 2.970127381  | 10.629177772 | 13.228276062 |
| H  | 2.701296300  | 9.924933548  | 11.637467143 |

|   |              |              |              |
|---|--------------|--------------|--------------|
| C | 0.880172515  | 10.224013732 | 12.770416977 |
| H | 0.585260673  | 10.297794991 | 13.827223698 |
| H | 0.688635944  | 11.206053874 | 12.322808098 |
| C | 0.028888569  | 9.145477932  | 12.083092621 |
| H | 0.248287487  | 9.140333664  | 11.007313936 |
| H | -1.039036915 | 9.375371525  | 12.186276440 |
| C | 0.320664033  | 7.749719271  | 12.660241190 |
| H | -0.290911630 | 6.989800562  | 12.170218240 |
| H | 0.039359282  | 7.747546547  | 13.719119544 |
| O | -0.914095574 | 4.442551954  | 12.657769086 |
| H | -0.619987107 | 3.978981732  | 13.471019225 |
| C | -2.265657473 | 4.087695931  | 12.505587287 |
| C | -3.100250698 | 4.597040418  | 13.507283989 |
| C | -2.713706461 | 3.285795372  | 11.458463932 |
| C | -4.447740683 | 4.239545894  | 13.515883598 |
| C | -4.066776204 | 2.849360004  | 11.582089407 |
| C | -4.926956472 | 3.334880105  | 12.557593483 |
| H | -2.668542013 | 5.256827976  | 14.248691593 |
| H | -5.960379202 | 3.019385976  | 12.619285923 |
| O | -4.437597043 | 1.886388659  | 10.693957573 |
| C | -5.822239137 | 1.683045362  | 10.407895304 |
| H | -6.339726567 | 1.207529210  | 11.249114311 |
| H | -6.309114649 | 2.632487925  | 10.159432570 |
| H | -5.849502960 | 1.021466415  | 9.541360351  |
| O | -5.359876364 | 4.682351122  | 14.413682959 |
| C | -4.942924495 | 5.624767020  | 15.396189222 |
| H | -4.554735305 | 6.540917190  | 14.932355856 |
| H | -5.833254104 | 5.863336233  | 15.979101157 |
| H | -4.177819212 | 5.200738322  | 16.059758908 |
| H | -2.477081512 | 0.938313248  | 10.499275437 |
| O | -1.618082145 | 1.386933539  | 10.466186863 |
| C | -1.906945560 | 2.783252484  | 10.249403629 |
| C | -0.529026009 | 3.405862250  | 9.944850984  |
| C | -2.684038494 | 2.959076709  | 8.921382760  |
| C | -0.394859237 | 4.804007366  | 9.506039771  |
| C | -2.407324403 | 2.076911248  | 7.870205143  |
| C | -3.568878015 | 4.019780018  | 8.694656263  |
| C | -3.000788743 | 2.251705733  | 6.619661890  |
| H | -1.729017258 | 1.247613073  | 8.043375091  |
| C | -4.162937797 | 4.194800680  | 7.445085083  |
| H | -3.814289787 | 4.704921484  | 9.499718222  |
| C | -3.878247220 | 3.314479088  | 6.399598378  |
| H | -2.776029514 | 1.555315036  | 5.815972361  |
| H | -4.851170133 | 5.021478463  | 7.288824035  |
| H | -4.338797265 | 3.453061282  | 5.425586645  |
| C | 0.658645488  | 5.145151581  | 8.603545217  |
| C | -1.223468710 | 5.872052714  | 9.953820560  |
| C | 0.847144485  | 6.450014282  | 8.158167019  |
| H | 1.278114778  | 4.349021325  | 8.202993591  |
| C | -1.045585245 | 7.165459454  | 9.483219627  |
| H | -2.027545833 | 5.669350912  | 10.648525120 |
| C | -0.013946570 | 7.462973030  | 8.585082746  |
| H | 1.647408133  | 6.668221408  | 7.456078133  |
| H | -1.708835187 | 7.953482621  | 9.827327821  |
| H | 0.115258426  | 8.478411989  | 8.221162264  |
| O | 0.059145561  | 2.620199446  | 14.379378187 |
| H | 0.298761365  | 2.713638718  | 15.312650600 |
| C | 1.094560985  | 2.072873117  | 13.664294796 |
| C | 2.296335577  | 1.752997344  | 14.281661340 |
| C | 0.837575525  | 1.839910432  | 12.289051729 |
| C | 3.289230027  | 1.126921192  | 13.507592795 |
| H | 2.453867975  | 1.979007123  | 15.328714210 |
| C | 1.849165930  | 1.096909804  | 11.573631394 |
| C | 3.067856185  | 0.788812630  | 12.160695394 |
| O | 4.509753508  | 0.817367519  | 13.974872166 |
| O | 1.505238860  | 0.755027602  | 10.326740563 |
| H | 3.866583564  | 0.291281639  | 11.628282584 |
| C | 2.455824636  | 0.070209994  | 9.501871630  |

|   |              |              |              |
|---|--------------|--------------|--------------|
| H | 3.345050362  | 0.689081914  | 9.346388839  |
| H | 2.733892802  | -0.894495281 | 9.940663938  |
| H | 1.949158680  | -0.093118820 | 8.551078391  |
| C | 4.840540025  | 1.106696115  | 15.335556195 |
| H | 4.196970660  | 0.548856270  | 16.025447184 |
| H | 5.873498914  | 0.783264574  | 15.460849595 |
| H | 4.767950622  | 2.181548998  | 15.540501377 |
| H | -0.040954353 | 2.705774269  | 9.267944617  |
| H | -0.187528823 | 1.687973051  | 11.958524462 |

=====  
**11-TS**  
=====

|    |              |              |              |
|----|--------------|--------------|--------------|
| Ru | 0.785369144  | 4.613073623  | 11.044985656 |
| P  | 2.265020805  | 5.716429936  | 12.695546542 |
| O  | 2.786330270  | 5.228323202  | 8.906546030  |
| C  | 2.042458424  | 4.928242480  | 9.749654047  |
| C  | 3.999805683  | 5.044345089  | 12.965923291 |
| H  | 4.508717568  | 5.736605321  | 13.650274546 |
| C  | 4.816402164  | 4.978699104  | 11.657024694 |
| H  | 4.878710907  | 5.961508848  | 11.178815675 |
| H  | 4.305517546  | 4.314758814  | 10.949532880 |
| C  | 6.234999461  | 4.440774214  | 11.913900294 |
| H  | 6.786168926  | 4.394129767  | 10.967322856 |
| H  | 6.778477981  | 5.145338598  | 12.559261175 |
| C  | 6.198402699  | 3.059520492  | 12.584507435 |
| H  | 7.215093231  | 2.703210373  | 12.786232185 |
| H  | 5.738322360  | 2.335876335  | 11.895030963 |
| C  | 5.375881020  | 3.103348827  | 13.880736687 |
| H  | 5.882814653  | 3.741748327  | 14.618242448 |
| H  | 5.307652043  | 2.102292423  | 14.325832825 |
| C  | 3.962842141  | 3.645670845  | 13.613750952 |
| H  | 3.459483977  | 2.966375011  | 12.922739910 |
| H  | 3.378765006  | 3.648484527  | 14.541370707 |
| C  | 1.534098449  | 5.814212541  | 14.429484945 |
| H  | 1.229636804  | 4.769950435  | 14.603236766 |
| C  | 2.462402599  | 6.202634225  | 15.601301219 |
| H  | 3.380031630  | 5.606880416  | 15.600531355 |
| H  | 2.767940768  | 7.249761396  | 15.497674441 |
| C  | 1.729231873  | 6.010742537  | 16.943167419 |
| H  | 1.515950284  | 4.939682830  | 17.080257312 |
| H  | 2.385116342  | 6.304970121  | 17.770667915 |
| C  | 0.411929172  | 6.800857248  | 16.999616778 |
| H  | -0.110913536 | 6.602313944  | 17.942280115 |
| H  | 0.637013292  | 7.876418133  | 16.986450838 |
| C  | -0.491460883 | 6.471912702  | 15.800607878 |
| H  | -1.399613189 | 7.086387745  | 15.823132207 |
| H  | -0.818743888 | 5.421532732  | 15.867101412 |
| C  | 0.255778873  | 6.683670273  | 14.474178238 |
| H  | 0.544449288  | 7.739113563  | 14.401000679 |
| H  | -0.399634245 | 6.474419808  | 13.624786415 |
| C  | 2.573673136  | 7.455944673  | 12.056810730 |
| H  | 3.190365448  | 7.246626977  | 11.170279911 |
| C  | 3.368886292  | 8.416690467  | 12.961605849 |
| H  | 4.280992703  | 7.942336438  | 13.341208809 |
| H  | 2.758126083  | 8.680055958  | 13.835057114 |
| C  | 3.727795317  | 9.703337458  | 12.194627789 |
| H  | 4.274269783  | 10.388465682 | 12.853217901 |
| H  | 4.409498547  | 9.448325294  | 11.370526411 |
| C  | 2.474872756  | 10.388968966 | 11.626245371 |
| H  | 1.849827244  | 10.742850933 | 12.459175483 |
| H  | 2.757637307  | 11.276162220 | 11.048275086 |
| C  | 1.652403191  | 9.423995986  | 10.758135690 |
| H  | 2.227708976  | 9.150424689  | 9.861653549  |
| H  | 0.734704103  | 9.907761280  | 10.405043565 |
| C  | 1.294081910  | 8.145140509  | 11.531794279 |
| H  | 0.725016905  | 7.469453883  | 10.884241197 |
| H  | 0.634768499  | 8.405743622  | 12.367005007 |

|   |              |              |              |
|---|--------------|--------------|--------------|
| O | -0.879991870 | 4.437941149  | 12.541001636 |
| H | -0.337899576 | 4.004088041  | 13.230304573 |
| C | -2.044720749 | 3.668517127  | 12.487979842 |
| C | -2.793587550 | 3.649969368  | 13.667126097 |
| C | -2.398269686 | 2.955685090  | 11.343525996 |
| C | -3.904987687 | 2.808809352  | 13.750281107 |
| C | -3.432302799 | 1.993889951  | 11.533471253 |
| C | -4.203542735 | 1.944803839  | 12.685915899 |
| H | -2.484082567 | 4.291001625  | 14.482547219 |
| H | -5.011042382 | 1.234305727  | 12.807018971 |
| O | -3.547046226 | 1.082287468  | 10.528921858 |
| C | -4.785451459 | 0.392668107  | 10.335515383 |
| H | -4.952700172 | -0.355131988 | 11.119146839 |
| H | -5.619405119 | 1.101827868  | 10.310068048 |
| H | -4.697520758 | -0.102706677 | 9.368206915  |
| O | -4.719096842 | 2.715239717  | 14.825695714 |
| C | -4.491588337 | 3.586455361  | 15.931420647 |
| H | -4.556538766 | 4.639150053  | 15.629385384 |
| H | -5.279443220 | 3.365566290  | 16.652168156 |
| H | -3.513644497 | 3.400178188  | 16.393762323 |
| H | -1.306048044 | 1.068531320  | 10.149366863 |
| O | -0.795479563 | 1.864066871  | 9.916819297  |
| C | -1.719963156 | 3.034061942  | 9.977973370  |
| C | -0.756101732 | 4.177892858  | 9.637610069  |
| C | -2.712036337 | 2.951446752  | 8.815511765  |
| C | -1.186102178 | 5.597167861  | 9.577415168  |
| C | -2.376516373 | 2.266043843  | 7.644591012  |
| C | -3.909362681 | 3.673440412  | 8.865677096  |
| C | -3.238170431 | 2.282671266  | 6.548042206  |
| H | -1.442777724 | 1.715888084  | 7.594330735  |
| C | -4.767594405 | 3.690882983  | 7.767138854  |
| H | -4.174235461 | 4.218549916  | 9.765556190  |
| C | -4.437322164 | 2.993135278  | 6.604896999  |
| H | -2.969332105 | 1.740008863  | 5.646513551  |
| H | -5.695325914 | 4.253158748  | 7.819914822  |
| H | -5.106333696 | 3.006687583  | 5.749789983  |
| C | -0.553708038 | 6.432341995  | 8.618846865  |
| C | -2.087362105 | 6.225725319  | 10.471101620 |
| C | -0.783185391 | 7.803180002  | 8.573792531  |
| H | 0.129764346  | 5.978763722  | 7.906123896  |
| C | -2.314564126 | 7.600732266  | 10.423732285 |
| H | -2.627171782 | 5.636699006  | 11.200730124 |
| C | -1.659582410 | 8.400826236  | 9.485670919  |
| H | -0.274162229 | 8.407892749  | 7.828956457  |
| H | -3.011244574 | 8.048550936  | 11.127349517 |
| H | -1.835858876 | 9.471983198  | 9.457316989  |
| O | 0.540949302  | 2.479004271  | 13.537445918 |
| H | 0.536959982  | 1.949691397  | 14.345835520 |
| C | 1.320681011  | 1.881889469  | 12.575949701 |
| C | 2.016576864  | 0.732223425  | 12.927238865 |
| C | 1.337014805  | 2.490594380  | 11.281154685 |
| C | 2.873052907  | 0.152639770  | 11.977204356 |
| H | 1.931936784  | 0.327829200  | 13.929812166 |
| C | 2.260063928  | 1.843366058  | 10.367716389 |
| C | 2.994838755  | 0.710094883  | 10.696046328 |
| O | 3.614790239  | -0.947010245 | 12.198966477 |
| O | 2.283390298  | 2.377552801  | 9.135410679  |
| H | 3.660142315  | 0.220601074  | 9.997467191  |
| C | 3.119724788  | 1.816704903  | 8.122957578  |
| H | 4.171622563  | 1.854285159  | 8.419616355  |
| H | 2.834704038  | 0.783215428  | 7.900966103  |
| H | 2.968586606  | 2.440198894  | 7.243438684  |
| C | 3.572872952  | -1.577807941 | 13.481156375 |
| H | 2.561313309  | -1.934504202 | 13.715362262 |
| H | 4.249939757  | -2.431134534 | 13.412102376 |
| H | 3.921226826  | -0.896759274 | 14.267798726 |
| H | -0.317089810 | 3.880020508  | 8.684532751  |
| H | 0.213471978  | 2.192467548  | 10.667931994 |

|    |              |              |              |
|----|--------------|--------------|--------------|
| Ru | 0.750063236  | 5.398205284  | 10.256581420 |
| P  | 2.595668452  | 6.194178660  | 11.526999378 |
| O  | 1.415563114  | 7.396194458  | 8.132364863  |
| C  | 1.174840392  | 6.619192011  | 8.958636555  |
| C  | 4.298925823  | 5.912190472  | 10.773924397 |
| H  | 4.942627871  | 6.567338983  | 11.378722724 |
| C  | 4.394660996  | 6.392267132  | 9.309459779  |
| H  | 4.034374891  | 7.421283975  | 9.204412861  |
| H  | 3.750098179  | 5.768255773  | 8.683771632  |
| C  | 5.838996780  | 6.302499682  | 8.789287687  |
| H  | 5.869332110  | 6.625898928  | 7.742136407  |
| H  | 6.476013455  | 6.999820975  | 9.351676564  |
| C  | 6.392139536  | 4.878409208  | 8.933142618  |
| H  | 7.429127500  | 4.832472192  | 8.581689204  |
| H  | 5.810584483  | 4.198253677  | 8.293187714  |
| C  | 6.294639443  | 4.396606397  | 10.386918970 |
| H  | 6.945830230  | 5.016168329  | 11.020374815 |
| H  | 6.658157351  | 3.366248696  | 10.475753345 |
| C  | 4.847770669  | 4.472641591  | 10.906224031 |
| H  | 4.227548315  | 3.786951272  | 10.327335297 |
| H  | 4.815484142  | 4.123807000  | 11.941368131 |
| C  | 2.705168597  | 5.330768034  | 13.183829121 |
| H  | 2.714070754  | 4.279571701  | 12.863171286 |
| C  | 3.967018270  | 5.564312957  | 14.049329188 |
| H  | 4.889280672  | 5.488607029  | 13.467559158 |
| H  | 3.945370749  | 6.571962011  | 14.473331974 |
| C  | 3.985051892  | 4.545360923  | 15.204052551 |
| H  | 4.053624686  | 3.529141023  | 14.789219620 |
| H  | 4.882784403  | 4.696581446  | 15.814438871 |
| C  | 2.721043504  | 4.666825926  | 16.070863228 |
| H  | 2.728289415  | 3.910469994  | 16.863983917 |
| H  | 2.725484337  | 5.645760082  | 16.570990759 |
| C  | 1.445046375  | 4.541475233  | 15.223604837 |
| H  | 0.555718848  | 4.705081863  | 15.844544645 |
| H  | 1.367052963  | 3.520635019  | 14.822148472 |
| C  | 1.442946542  | 5.524088256  | 14.040655461 |
| H  | 1.407918299  | 6.557351837  | 14.414416990 |
| H  | 0.552164485  | 5.365311469  | 13.435458225 |
| C  | 2.591002497  | 8.070792698  | 11.705924678 |
| H  | 2.975342219  | 8.389756662  | 10.726671852 |
| C  | 3.538732883  | 8.635736796  | 12.785924561 |
| H  | 4.542197301  | 8.205854365  | 12.703226459 |
| H  | 3.152723023  | 8.363293190  | 13.775646808 |
| C  | 3.614964469  | 10.170246212 | 12.695264768 |
| H  | 4.295000770  | 10.548581401 | 13.466951644 |
| H  | 4.047671512  | 10.455849884 | 11.726052618 |
| C  | 2.223014846  | 10.800563745 | 12.844984771 |
| H  | 1.840403116  | 10.593884069 | 13.854889278 |
| H  | 2.283034607  | 11.890240912 | 12.748863646 |
| C  | 1.249460834  | 10.227462854 | 11.805834832 |
| H  | 1.570967357  | 10.532113323 | 10.799664275 |
| H  | 0.243538502  | 10.638754811 | 11.950460776 |
| C  | 1.189346972  | 8.690551324  | 11.859668880 |
| H  | 0.532507562  | 8.329517303  | 11.064381727 |
| H  | 0.747792097  | 8.367267162  | 12.812070283 |
| O  | -3.577250433 | 1.257074625  | 12.120031596 |
| H  | -3.817027589 | 0.638866873  | 12.822831353 |
| C  | -2.488676862 | 0.789990829  | 11.442578161 |
| C  | -1.779110536 | -0.326518881 | 11.912587947 |
| C  | -2.138503126 | 1.451493854  | 10.258436888 |
| C  | -0.731855686 | -0.838885354 | 11.144623517 |
| C  | -1.052384951 | 0.907803918  | 9.530450683  |
| C  | -0.364793765 | -0.224804571 | 9.938139694  |
| H  | -2.077467982 | -0.790691353 | 12.845679945 |

|   |              |              |              |
|---|--------------|--------------|--------------|
| H | 0.471012221  | -0.624710999 | 9.379683604  |
| O | -0.734421554 | 1.599986319  | 8.392749525  |
| C | -0.101944706 | 0.904000270  | 7.312422304  |
| H | 0.935432523  | 0.654809132  | 7.553187679  |
| H | -0.665561091 | -0.001148798 | 7.064760271  |
| H | -0.125199934 | 1.592226261  | 6.465845001  |
| O | 0.024175598  | -1.913183064 | 11.496144359 |
| C | -0.330390883 | -2.650975689 | 12.664011264 |
| H | -1.351080385 | -3.045267510 | 12.590323238 |
| H | 0.374758491  | -3.481047594 | 12.718253934 |
| H | -0.239734061 | -2.037417170 | 13.569471525 |
| H | -0.745702381 | 3.507681164  | 8.506654464  |
| O | -0.608276612 | 4.471386760  | 8.411628004  |
| C | -3.016609616 | 2.439909821  | 9.562622653  |
| C | -3.199500850 | 3.735026289  | 9.890325941  |
| C | -3.684149795 | 1.914078279  | 8.332774824  |
| C | -2.600891620 | 4.569129559  | 10.943729201 |
| C | -3.742150150 | 2.681772467  | 7.157324776  |
| C | -4.259204553 | 0.633856193  | 8.323679668  |
| C | -4.386248095 | 2.196825471  | 6.020028657  |
| H | -3.250338055 | 3.650269555  | 7.130433989  |
| C | -4.907750966 | 0.151500244  | 7.187333923  |
| H | -4.212297518 | 0.021257809  | 9.218844792  |
| C | -4.978073154 | 0.931567473  | 6.031077488  |
| H | -4.416920896 | 2.804327235  | 5.119613592  |
| H | -5.362453005 | -0.835096479 | 7.206310782  |
| H | -5.480611908 | 0.554116498  | 5.145434757  |
| C | -2.205294056 | 5.877222967  | 10.580629155 |
| C | -2.484056111 | 4.192611725  | 12.290632256 |
| C | -1.726904309 | 6.776543044  | 11.535272451 |
| H | -2.314819620 | 6.191575751  | 9.547618579  |
| C | -2.010194990 | 5.098775188  | 13.246054765 |
| H | -2.837544271 | 3.217311828  | 12.600040293 |
| C | -1.639694204 | 6.390328747  | 12.880001061 |
| H | -1.485750757 | 7.790910612  | 11.238207775 |
| H | -1.949962225 | 4.794281531  | 14.287307231 |
| H | -1.294439654 | 7.096734369  | 13.628113344 |
| O | 0.658447436  | 3.482894261  | 11.660373589 |
| H | -0.198851956 | 3.015108047  | 11.657307441 |
| C | 1.538356256  | 2.899852011  | 10.702123659 |
| C | 1.795977477  | 3.788156651  | 9.676263021  |
| C | 2.067408969  | 1.622004639  | 10.806910129 |
| C | 2.469593737  | 3.301357259  | 8.551862125  |
| H | 0.143227623  | 4.537463667  | 7.799138344  |
| C | 2.836638455  | 1.193161107  | 9.713996698  |
| C | 3.019198428  | 2.015953866  | 8.583778531  |
| O | 2.481680561  | 4.133940303  | 7.463268821  |
| O | 3.400513622  | -0.040090370 | 9.617809161  |
| H | 3.578649242  | 1.603025570  | 7.753180123  |
| C | 3.386266073  | -0.887944820 | 10.767617692 |
| H | 3.849372403  | -0.389861215 | 11.629219744 |
| H | 2.369691191  | -1.204431101 | 11.028505256 |
| H | 3.977330389  | -1.763577767 | 10.495483355 |
| C | 3.182646618  | 3.712678066  | 6.292133847  |
| H | 2.754253724  | 2.789593265  | 5.882277911  |
| H | 3.069457831  | 4.521145219  | 5.569085739  |
| H | 4.247203390  | 3.556445730  | 6.502095577  |
| H | -3.852353309 | 4.298391872  | 9.226644803  |
| H | 1.830614363  | 0.984992419  | 11.648269458 |

---

**5'-TS**

---

|    |             |             |              |
|----|-------------|-------------|--------------|
| Ru | 1.067173606 | 4.898456210 | 11.398693259 |
| P  | 2.759115367 | 6.146886436 | 12.338033216 |
| O  | 1.202773199 | 6.394677216 | 8.814005421  |
| C  | 1.164602394 | 5.818129551 | 9.816679216  |
| C  | 4.463508810 | 6.027505365 | 11.592293442 |



|   |              |              |               |
|---|--------------|--------------|---------------|
| H | 5.033785284  | 6.822702332  | 12.095248698  |
| C | 4.453832644  | 6.329473351  | 10.077116445  |
| H | 3.992785461  | 7.302293916  | 9.873473299   |
| H | 3.851697740  | 5.571740974  | 9.565629642   |
| C | 5.881228824  | 6.305624647  | 9.505042711   |
| H | 5.843001471  | 6.499455846  | 8.426949366   |
| H | 6.470182183  | 7.120031008  | 9.950133501   |
| C | 6.568527829  | 4.963420838  | 9.790487732   |
| H | 7.589304115  | 4.964250535  | 9.392391816   |
| H | 6.024878371  | 4.161132790  | 9.270108418   |
| C | 6.581665491  | 4.663427857  | 11.295753922  |
| H | 7.195925426  | 5.414717698  | 11.812363836  |
| H | 7.045384826  | 3.689903043  | 11.491206670  |
| C | 5.158458189  | 4.676969748  | 11.880150454  |
| H | 4.574780253  | 3.869320730  | 11.427728370  |
| H | 5.200886347  | 4.473672671  | 12.954839301  |
| C | 2.933947970  | 5.637153259  | 14.122980335  |
| H | 3.120112214  | 4.559123206  | 14.025361030  |
| C | 4.122589315  | 6.255117189  | 14.896173377  |
| H | 5.056160803  | 6.173949360  | 14.331749433  |
| H | 3.943679967  | 7.323423074  | 15.058339608  |
| C | 4.271574112  | 5.551519414  | 16.257956596  |
| H | 4.532425860  | 4.496981782  | 16.088843164  |
| H | 5.106407721  | 5.996293770  | 16.8111107511 |
| C | 2.976939634  | 5.636241495  | 17.081925698  |
| H | 3.091520970  | 5.090997312  | 18.025154257  |
| H | 2.788657586  | 6.686020139  | 17.347601464  |
| C | 1.770844666  | 5.095755218  | 16.296682257  |
| H | 0.849448803  | 5.220812054  | 16.876882672  |
| H | 1.895866952  | 4.016616550  | 16.125450193  |
| C | 1.630539853  | 5.799834743  | 14.936243708  |
| H | 1.437534025  | 6.866802477  | 15.102982848  |
| H | 0.766907277  | 5.401649325  | 14.390340284  |
| C | 2.252552439  | 7.935027207  | 12.156286705  |
| H | 2.406442176  | 8.104033206  | 11.080866714  |
| C | 3.096116367  | 8.970659523  | 12.927231918  |
| H | 4.166967749  | 8.825516913  | 12.745627202  |
| H | 2.931691071  | 8.839791552  | 14.003857843  |
| C | 2.677992386  | 10.397658961 | 12.528290387  |
| H | 3.270371480  | 11.125738391 | 13.093606724  |
| H | 2.912694884  | 10.556965900 | 11.466830793  |
| C | 1.176757477  | 10.627678002 | 12.763186244  |
| H | 0.969039631  | 10.575476401 | 13.841629636  |
| H | 0.892916639  | 11.634683368 | 12.438487721  |
| C | 0.327338427  | 9.574343254  | 12.034560205  |
| H | 0.446209605  | 9.694260534  | 10.948262117  |
| H | -0.737829073 | 9.711377520  | 12.249964332  |
| C | 0.745121920  | 8.148692509  | 12.428538286  |
| H | 0.129135383  | 7.427966247  | 11.871061863  |
| H | 0.529257592  | 7.988009727  | 13.490561688  |
| O | 1.324164169  | 3.140819109  | 13.021168465  |
| H | 0.707744286  | 2.552211883  | 13.478721178  |
| C | 2.007564286  | 2.468456050  | 11.976321759  |
| C | 2.515697469  | 1.180616695  | 12.079084652  |
| C | 2.127299061  | 3.296716054  | 10.872523094  |
| C | 3.194890127  | 0.706661215  | 10.943577188  |
| C | 2.786166205  | 2.785355467  | 9.741525275   |
| C | 3.340801672  | 1.504718558  | 9.792009609   |
| H | 2.402431344  | 0.598443757  | 12.985143226  |
| H | 3.856167996  | 1.064317894  | 8.948256761   |
| O | 2.824549421  | 3.598657510  | 8.649555653   |
| C | 3.459132679  | 3.120278445  | 7.463417212   |
| H | 4.521774344  | 2.910174483  | 7.635281561   |
| H | 2.962740241  | 2.216799132  | 7.088670284   |
| H | 3.362887405  | 3.923236057  | 6.731470036   |
| O | 3.758961777  | -0.522832130 | 10.854596608  |
| C | 3.671815421  | -1.401148677 | 11.971355230  |
| H | 2.627766027  | -1.638095642 | 12.215548732  |

|   |              |              |              |
|---|--------------|--------------|--------------|
| H | 4.188133262  | -2.314636240 | 11.674544502 |
| H | 4.164865910  | -0.977236578 | 12.855551186 |
| H | -0.339609742 | 3.862839619  | 7.873316713  |
| O | -1.095888091 | 4.105192818  | 8.442279143  |
| C | -1.271895181 | 3.144404142  | 9.412191708  |
| C | -1.861765892 | 3.480153344  | 10.599427616 |
| C | -0.778484917 | 1.793929612  | 9.072080019  |
| H | -2.056031740 | 2.667737474  | 11.300095869 |
| C | -2.182183669 | 4.825065716  | 11.097962169 |
| C | -0.347570442 | 0.889392298  | 10.068768220 |
| C | -0.694916189 | 1.406855076  | 7.713597665  |
| C | 0.149631214  | -0.361563969 | 9.720257387  |
| H | -0.364780840 | 1.185944631  | 11.117012655 |
| C | -0.191685641 | 0.153555512  | 7.365740406  |
| H | -1.065704122 | 2.071939717  | 6.927744195  |
| C | 0.233308670  | -0.733905095 | 8.368495702  |
| H | 0.490770764  | -1.043852161 | 10.504235954 |
| H | -0.146383467 | -0.132680241 | 6.313080602  |
| H | 0.627692146  | -1.709524175 | 8.099479003  |
| C | -2.278734310 | 5.986863381  | 10.292772219 |
| C | -2.349919478 | 4.977816110  | 12.499477311 |
| C | -2.555102328 | 7.225821666  | 10.869419640 |
| H | -2.163849686 | 5.906974657  | 9.218028922  |
| C | -2.607332510 | 6.222292673  | 13.069892935 |
| H | -2.292904350 | 4.097072045  | 13.139940698 |
| C | -2.725919465 | 7.353434758  | 12.253422231 |
| H | -2.643727989 | 8.100105842  | 10.226723770 |
| H | -2.738221060 | 6.304777555  | 14.148363873 |
| H | -2.944398631 | 8.322960361  | 12.691997209 |

=====

6'

=====

|    |             |             |              |
|----|-------------|-------------|--------------|
| Ru | 0.827539027 | 4.776070236 | 11.376416440 |
| P  | 2.540624431 | 6.149248500 | 12.279595018 |
| O  | 1.192081240 | 6.075617203 | 8.718020576  |
| C  | 1.061918002 | 5.569983300 | 9.754038324  |
| C  | 4.290709337 | 5.915080937 | 11.650577493 |
| H  | 4.846796591 | 6.763888011 | 12.071584339 |
| C  | 4.359941581 | 6.019581497 | 10.111365297 |
| H  | 3.937880770 | 6.971187527 | 9.768331260  |
| H  | 3.755158399 | 5.222976742 | 9.667674750  |
| C  | 5.806416160 | 5.888194305 | 9.605238949  |
| H  | 5.812362688 | 5.933260391 | 8.509909579  |
| H  | 6.398905121 | 6.744416075 | 9.957810062  |
| C  | 6.452000386 | 4.586240279 | 10.099388094 |
| H  | 7.484725474 | 4.510313018 | 9.741018638  |
| H  | 5.904973133 | 3.727641585 | 9.682383871  |
| C  | 6.408440602 | 4.509907012 | 11.631910051 |
| H  | 7.015622412 | 5.323534245 | 12.053991208 |
| H  | 6.851028461 | 3.571333517 | 11.984938686 |
| C  | 4.965576004 | 4.618804917 | 12.155134289 |
| H  | 4.398130037 | 3.751447395 | 11.810251875 |
| H  | 4.970717975 | 4.581837992 | 13.249368924 |
| C  | 2.659558069 | 5.873462105 | 14.126134090 |
| H  | 2.905079393 | 4.803864847 | 14.162491263 |
| C  | 3.777286631 | 6.643090097 | 14.865191728 |
| H  | 4.738234805 | 6.553778503 | 14.349747340 |
| H  | 3.530685753 | 7.710468829 | 14.893835757 |
| C  | 3.908540308 | 6.116146381 | 16.306610185 |
| H  | 4.235605038 | 5.066841571 | 16.274338136 |
| H  | 4.692763588 | 6.672454784 | 16.832342081 |
| C  | 2.578241727 | 6.215435998 | 17.069532275 |
| H  | 2.684446157 | 5.793410495 | 18.075071065 |
| H  | 2.316928587 | 7.275201600 | 17.199773514 |
| C  | 1.442487694 | 5.511520009 | 16.310429351 |
| H  | 0.490570057 | 5.641854242 | 16.839024290 |
| H  | 1.639846941 | 4.429843329 | 16.273832029 |

|   |              |              |              |
|---|--------------|--------------|--------------|
| C | 1.319875984  | 6.043968673  | 14.873153321 |
| H | 1.051351591  | 7.106400866  | 14.908298660 |
| H | 0.509887590  | 5.533930535  | 14.345147470 |
| C | 2.128552006  | 7.926531676  | 11.850460502 |
| H | 2.143760992  | 7.894062936  | 10.751389184 |
| C | 3.127785942  | 9.016925196  | 12.288998162 |
| H | 4.151516408  | 8.761887105  | 11.995696602 |
| H | 3.119173092  | 9.105581303  | 13.381638212 |
| C | 2.733146572  | 10.371985200 | 11.670643786 |
| H | 3.436330064  | 11.144731084 | 12.001405300 |
| H | 2.828803305  | 10.307279329 | 10.577464361 |
| C | 1.292939155  | 10.764792102 | 12.036102142 |
| H | 1.231068177  | 10.936924114 | 13.120274509 |
| H | 1.024572835  | 11.710880800 | 11.552963537 |
| C | 0.296745050  | 9.661826237  | 11.645583306 |
| H | 0.268435153  | 9.560127618  | 10.551155952 |
| H | -0.718307871 | 9.927130539  | 11.963281588 |
| C | 0.693128741  | 8.312621696  | 12.264971669 |
| H | -0.021063976 | 7.538682627  | 11.966937493 |
| H | 0.634074983  | 8.391424299  | 13.356502475 |
| O | 1.218826586  | 3.218354910  | 13.245183966 |
| H | 0.695008109  | 2.618198790  | 13.793253584 |
| C | 1.980122991  | 2.505221025  | 12.289639843 |
| C | 2.587104273  | 1.279482999  | 12.542861867 |
| C | 2.037737097  | 3.197289128  | 11.093098090 |
| C | 3.298984553  | 0.716895509  | 11.471329476 |
| C | 2.725820400  | 2.594470239  | 10.030064595 |
| C | 3.367669857  | 1.368306727  | 10.226658130 |
| H | 2.514977885  | 0.806378738  | 13.514598753 |
| H | 3.911331815  | 0.867475181  | 9.435935477  |
| O | 2.693038383  | 3.263292800  | 8.842502284  |
| C | 3.316849600  | 2.667410563  | 7.707174693  |
| H | 4.393534816  | 2.532368548  | 7.866173113  |
| H | 2.856430041  | 1.701232420  | 7.467072030  |
| H | 3.159401193  | 3.363545905  | 6.882435763  |
| O | 3.954252374  | -0.472008649 | 11.531472654 |
| C | 3.944610964  | -1.193270255 | 12.757825390 |
| H | 2.924621196  | -1.476993758 | 13.050091599 |
| H | 4.531138995  | -2.095374809 | 12.580212345 |
| H | 4.406287896  | -0.614755667 | 13.568576315 |
| H | -0.816625806 | 4.203248590  | 7.912220077  |
| O | -1.326645998 | 4.399489539  | 8.711429134  |
| C | -1.112353458 | 3.453086716  | 9.651726915  |
| C | -1.329754857 | 3.780335035  | 10.978631751 |
| C | -0.752815265 | 2.102962829  | 9.179327619  |
| H | -1.345772302 | 2.938236372  | 11.662441495 |
| C | -1.806956343 | 5.050882435  | 11.553432491 |
| C | -0.221266668 | 1.125570067  | 10.038713262 |
| C | -0.955238627 | 1.769435751  | 7.826329508  |
| C | 0.118084807  | -0.132487466 | 9.555236534  |
| H | -0.031773349 | 1.356816527  | 11.078063560 |
| C | -0.612519563 | 0.508842772  | 7.344596405  |
| H | -1.429446730 | 2.473183186  | 7.147912840  |
| C | -0.068762228 | -0.444655120 | 8.206421697  |
| H | 0.548167753  | -0.865176010 | 10.230539439 |
| H | -0.785098425 | 0.268523497  | 6.299951087  |
| H | 0.201706813  | -1.426883741 | 7.830840562  |
| C | -2.247430908 | 6.175524182  | 10.812577984 |
| C | -1.829554757 | 5.145647300  | 12.968076569 |
| C | -2.698974032 | 7.317363636  | 11.466513282 |
| H | -2.250120286 | 6.135451426  | 9.733168697  |
| C | -2.272559005 | 6.298390147  | 13.612625148 |
| H | -1.524224717 | 4.284636651  | 13.557958344 |
| C | -2.714412316 | 7.388424777  | 12.863110288 |
| H | -3.043918756 | 8.162269010  | 10.877910347 |
| H | -2.279874850 | 6.338157133  | 14.697673809 |
| H | -3.070201157 | 8.285734968  | 13.360208241 |

6'-TS

|    |              |              |              |
|----|--------------|--------------|--------------|
| Ru | 0.358368681  | 4.949002104  | 10.302604692 |
| P  | 2.136352749  | 5.986509800  | 11.542637271 |
| O  | 1.042364404  | 6.857146360  | 8.132474474  |
| C  | 0.799510599  | 6.085827545  | 8.967341828  |
| C  | 3.886780855  | 5.450126577  | 11.143372213 |
| H  | 4.547668874  | 5.969712982  | 11.850392932 |
| C  | 4.308075386  | 5.840298651  | 9.711089295  |
| H  | 4.219844353  | 6.920844062  | 9.556342094  |
| H  | 3.627612938  | 5.362124614  | 8.994839909  |
| C  | 5.756627163  | 5.404249320  | 9.427340448  |
| H  | 6.026091597  | 5.668741675  | 8.397542114  |
| H  | 6.433795244  | 5.972574412  | 10.080288858 |
| C  | 5.962786653  | 3.900756156  | 9.667656189  |
| H  | 7.014724496  | 3.632692997  | 9.517544058  |
| H  | 5.381594564  | 3.333606082  | 8.927806609  |
| C  | 5.504010126  | 3.489936352  | 11.075320140 |
| H  | 6.171056601  | 3.938981814  | 11.824718075 |
| H  | 5.584632039  | 2.402405415  | 11.197351631 |
| C  | 4.056956960  | 3.932539460  | 11.347445454 |
| H  | 3.389825786  | 3.417114130  | 10.655279462 |
| H  | 3.759070274  | 3.632410704  | 12.358937598 |
| C  | 1.887479430  | 5.546713126  | 13.348327783 |
| H  | 1.634040807  | 4.475867502  | 13.280783155 |
| C  | 3.095482971  | 5.676054197  | 14.298379457 |
| H  | 3.983700553  | 5.187100899  | 13.887552791 |
| H  | 3.349102045  | 6.735637937  | 14.424056903 |
| C  | 2.748797330  | 5.062376462  | 15.668472065 |
| H  | 2.580885515  | 3.982747752  | 15.542021738 |
| H  | 3.602338665  | 5.168710663  | 16.347532077 |
| C  | 1.494094646  | 5.705380439  | 16.282292615 |
| H  | 1.243618524  | 5.219347381  | 17.231794720 |
| H  | 1.708444041  | 6.757808021  | 16.515859124 |
| C  | 0.297901554  | 5.644283649  | 15.318488942 |
| H  | -0.565058961 | 6.168004567  | 15.745903694 |
| H  | -0.006585825 | 4.597178994  | 15.173845446 |
| C  | 0.657494534  | 6.258412127  | 13.955554370 |
| H  | 0.891853513  | 7.320414474  | 14.099009625 |
| H  | -0.198968566 | 6.212374111  | 13.271220926 |
| C  | 2.173773206  | 7.848380734  | 11.331647198 |
| H  | 2.456655657  | 7.935668569  | 10.273295620 |
| C  | 3.227088958  | 8.607763510  | 12.163055494 |
| H  | 4.215281664  | 8.143568145  | 12.068997869 |
| H  | 2.952338336  | 8.564531706  | 13.225215084 |
| C  | 3.299830871  | 10.081600968 | 11.719701152 |
| H  | 4.031429283  | 10.616462612 | 12.336228194 |
| H  | 3.669498546  | 10.123755267 | 10.685189484 |
| C  | 1.926629875  | 10.767264611 | 11.797557116 |
| H  | 1.609499546  | 10.820931296 | 12.849133253 |
| H  | 1.997348334  | 11.799760298 | 11.437407847 |
| C  | 0.871803642  | 9.989387701  | 10.995642951 |
| H  | 1.128229550  | 10.016296518 | 9.926951974  |
| H  | -0.113114590 | 10.461024370 | 11.093911080 |
| C  | 0.789307415  | 8.522576119  | 11.449891848 |
| H  | 0.046259645  | 7.988291350  | 10.850737992 |
| H  | 0.439576153  | 8.488317038  | 12.487967645 |
| O  | 0.207332339  | 2.103050136  | 11.230336454 |
| H  | 0.323792462  | 1.345920915  | 11.820431899 |
| C  | 1.112305733  | 2.056948140  | 10.206302047 |
| C  | 2.081594371  | 1.065764755  | 10.166299111 |
| C  | 0.971746025  | 3.087660433  | 9.232992743  |
| C  | 2.971311993  | 1.055420512  | 9.081243898  |
| C  | 1.966256407  | 3.065610087  | 8.197146736  |
| C  | 2.922738997  | 2.063139684  | 8.101681662  |
| H  | 2.153397371  | 0.338653662  | 10.966982560 |
| H  | 3.652580759  | 2.022044157  | 7.304485745  |

|   |              |              |              |
|---|--------------|--------------|--------------|
| O | 1.874902138  | 4.067733373  | 7.297121016  |
| C | 2.808710386  | 4.144046726  | 6.217178018  |
| H | 3.832688368  | 4.252972097  | 6.592449001  |
| H | 2.745795595  | 3.261931475  | 5.568680025  |
| H | 2.528485959  | 5.036185828  | 5.657257349  |
| O | 3.935454365  | 0.137018902  | 8.905402027  |
| C | 4.064798842  | -0.934988818 | 9.843864579  |
| H | 3.148930369  | -1.535978881 | 9.884763579  |
| H | 4.887657407  | -1.548770523 | 9.477930160  |
| H | 4.308048837  | -0.556656487 | 10.843794352 |
| H | -0.486442423 | 3.401023717  | 6.676101946  |
| O | -0.863292731 | 3.905481743  | 7.407421613  |
| C | -0.849854584 | 3.165424394  | 8.564720691  |
| C | -1.427878477 | 3.922898022  | 9.676716487  |
| C | -1.233455187 | 1.724121364  | 8.351859184  |
| C | -2.013108070 | 5.249189084  | 9.712660290  |
| C | -0.635000760 | 1.001023009  | 7.308006992  |
| C | -2.186058685 | 1.088710483  | 9.154094361  |
| C | -0.998730388 | -0.317582303 | 7.053996741  |
| H | 0.150606614  | 1.452866120  | 6.705945400  |
| C | -2.548815689 | -0.235055175 | 8.901596131  |
| H | -2.671888856 | 1.628547623  | 9.958822410  |
| C | -1.967143457 | -0.939823364 | 7.848064499  |
| H | -0.527290684 | -0.860230429 | 6.239816702  |
| H | -3.299555183 | -0.711115273 | 9.525738617  |
| H | -2.258505113 | -1.967006723 | 7.649808313  |
| C | -2.131371472 | 5.808723168  | 11.026242622 |
| C | -2.361321324 | 6.074987697  | 8.606425185  |
| C | -2.565513916 | 7.129626222  | 11.212930604 |
| H | -1.999620744 | 5.165101971  | 11.895012655 |
| C | -2.795856637 | 7.370514650  | 8.817788092  |
| H | -2.275184487 | 5.677369480  | 7.605234563  |
| C | -2.890185645 | 7.912464598  | 10.114735730 |
| H | -2.657145607 | 7.526073419  | 12.219792934 |
| H | -3.068207390 | 7.982533453  | 7.962456380  |
| H | -3.231007694 | 8.934259216  | 10.251243458 |
| H | -1.652895472 | 3.325001618  | 10.555068981 |

=====

7'

=====

|    |             |             |              |
|----|-------------|-------------|--------------|
| Ru | 0.640340578 | 4.847834634 | 10.289992651 |
| P  | 2.440351356 | 5.789344502 | 11.549657598 |
| O  | 1.314734953 | 6.870714391 | 8.222202086  |
| C  | 1.076553480 | 6.085502648 | 9.047297328  |
| C  | 4.140623347 | 5.157171726 | 11.093634479 |
| H  | 4.851222914 | 5.612812953 | 11.795853502 |
| C  | 4.553690520 | 5.561687466 | 9.662455241  |
| H  | 4.517881141 | 6.648025979 | 9.530567439  |
| H  | 3.834549411 | 5.129241893 | 8.952984922  |
| C  | 5.973125613 | 5.058969321 | 9.342662206  |
| H  | 6.242812876 | 5.342294791 | 8.318065559  |
| H  | 6.686201739 | 5.571159315 | 10.003630704 |
| C  | 6.100292078 | 3.540051157 | 9.528658602  |
| H  | 7.137742375 | 3.225262368 | 9.369019518  |
| H  | 5.499493371 | 3.027300924 | 8.769726950  |
| C  | 5.623036684 | 3.101626592 | 10.921119367 |
| H  | 6.318785076 | 3.478653665 | 11.683803680 |
| H  | 5.639334665 | 2.007856994 | 10.998702485 |
| C  | 4.209716509 | 3.622684730 | 11.235776804 |
| H  | 3.486479241 | 3.178892747 | 10.542367249 |
| H  | 3.915981145 | 3.301506067 | 12.241280674 |
| C  | 2.193097043 | 5.274086378 | 13.342786684 |
| H  | 1.886090655 | 4.219799465 | 13.245154828 |
| C  | 3.438449519 | 5.305147534 | 14.260398753 |
| H  | 4.278562472 | 4.765683037 | 13.814242542 |
| H  | 3.765970368 | 6.341510368 | 14.397847637 |
| C  | 3.104132575 | 4.687310323 | 15.631462358 |

|   |              |              |              |
|---|--------------|--------------|--------------|
| H | 2.866920488  | 3.622209618  | 15.494204604 |
| H | 3.988900124  | 4.729554352  | 16.276654519 |
| C | 1.915663844  | 5.391664006  | 16.302949035 |
| H | 1.673554234  | 4.905396274  | 17.254300825 |
| H | 2.197479847  | 6.426964864  | 16.541583957 |
| C | 0.687124162  | 5.407757872  | 15.381494400 |
| H | -0.136005935 | 5.962569246  | 15.846509825 |
| H | 0.327356003  | 4.379571776  | 15.228420459 |
| C | 1.027976110  | 6.030624965  | 14.018084527 |
| H | 1.320843754  | 7.077031911  | 14.168134325 |
| H | 0.147118546  | 6.042678378  | 13.371694221 |
| C | 2.618797736  | 7.653846647  | 11.417783592 |
| H | 3.012458425  | 7.763364945  | 10.397355207 |
| C | 3.635502627  | 8.295001898  | 12.385078701 |
| H | 4.594603739  | 7.765981415  | 12.362644306 |
| H | 3.253924954  | 8.222886662  | 13.411293018 |
| C | 3.848948848  | 9.779707524  | 12.037035525 |
| H | 4.559428315  | 10.223813043 | 12.743443071 |
| H | 4.309473515  | 9.851600352  | 11.041367365 |
| C | 2.524517467  | 10.557371950 | 12.043787551 |
| H | 2.118727545  | 10.571114832 | 13.065655010 |
| H | 2.696270626  | 11.601705489 | 11.760503076 |
| C | 1.500817490  | 9.906805648  | 11.102699899 |
| H | 1.853817105  | 9.985014229  | 10.064477138 |
| H | 0.542322652  | 10.437420941 | 11.147268994 |
| C | 1.282470006  | 8.423822187  | 11.445170640 |
| H | 0.573138550  | 7.983743650  | 10.743176755 |
| H | 0.827380936  | 8.346847775  | 12.439474758 |
| O | 0.138334114  | 1.342524716  | 10.574271089 |
| H | 0.299446439  | 0.465233636  | 10.946133996 |
| C | 1.112536321  | 1.660777588  | 9.678753731  |
| C | 2.303124248  | 0.937094935  | 9.672158076  |
| C | 0.824475110  | 2.718368671  | 8.763722155  |
| C | 3.267424627  | 1.235623565  | 8.704840310  |
| C | 1.895418919  | 3.033270234  | 7.852934086  |
| C | 3.069011749  | 2.298016333  | 7.808712927  |
| H | 2.455666303  | 0.152639994  | 10.403685920 |
| H | 3.857280826  | 2.515488662  | 7.102082162  |
| O | 1.689010286  | 4.094283548  | 7.028177210  |
| C | 2.672880180  | 4.465688949  | 6.055433459  |
| H | 3.617097813  | 4.730125629  | 6.542835954  |
| H | 2.833143343  | 3.659613000  | 5.332099806  |
| H | 2.264403430  | 5.342130681  | 5.553734030  |
| O | 4.445190696  | 0.597085234  | 8.577754698  |
| C | 4.724550780  | -0.528375980 | 9.414479698  |
| H | 3.978271080  | -1.318757152 | 9.274778393  |
| H | 5.703346117  | -0.891417869 | 9.102044739  |
| H | 4.764160185  | -0.235404732 | 10.470267717 |
| H | -0.083874234 | 4.308637329  | 7.101646723  |
| O | -0.890368394 | 3.805341571  | 7.288444192  |
| C | -0.709931135 | 3.021838549  | 8.453776920  |
| C | -1.149329690 | 3.752230024  | 9.714044864  |
| C | -1.485345935 | 1.730953149  | 8.181869501  |
| C | -1.629378936 | 5.088303081  | 9.865485124  |
| C | -0.935915311 | 0.761542285  | 7.336030381  |
| C | -2.778941264 | 1.553782668  | 8.673440513  |
| C | -1.664562815 | -0.376841739 | 6.999973341  |
| H | 0.062739103  | 0.901622056  | 6.931684959  |
| C | -3.513459890 | 0.415220172  | 8.334820656  |
| H | -3.223805612 | 2.309130970  | 9.315613951  |
| C | -2.957200302 | -0.553836110 | 7.500758002  |
| H | -1.229016201 | -1.122458014 | 6.340696508  |
| H | -4.521263045 | 0.289393197  | 8.720104001  |
| H | -3.527536077 | -1.439635503 | 7.236773832  |
| C | -2.107518301 | 5.971702622  | 8.837888402  |
| C | -1.409478652 | 5.645176090  | 11.183715072 |
| C | -2.414737788 | 7.274837692  | 9.145997979  |
| H | -2.248436932 | 5.574828649  | 7.842464942  |

|   |              |             |              |
|---|--------------|-------------|--------------|
| C | -1.764138528 | 6.990468167 | 11.464116029 |
| H | -1.283979470 | 4.960043891 | 12.024039535 |
| C | -2.246024296 | 7.795421554 | 10.458087197 |
| H | -2.809825542 | 7.922744147 | 8.368682770  |
| H | -1.655532636 | 7.370093489 | 12.474683149 |
| H | -2.515235824 | 8.826907707 | 10.663088313 |
| H | -1.271095179 | 3.099392237 | 10.577973492 |

---

**7'-TS**

---

|    |              |              |              |
|----|--------------|--------------|--------------|
| Ru | 0.553585556  | 5.028069361  | 10.339296172 |
| P  | 2.278159963  | 5.817808117  | 11.706916985 |
| O  | 1.204125384  | 7.141935084  | 8.344402249  |
| C  | 0.981191648  | 6.349296961  | 9.160825372  |
| C  | 3.750225074  | 4.731877544  | 11.294560023 |
| H  | 4.512332006  | 4.842784561  | 12.075906744 |
| C  | 4.384427489  | 5.110059767  | 9.938229962  |
| H  | 4.794221450  | 6.124711109  | 9.975751751  |
| H  | 3.607314056  | 5.108873119  | 9.160951716  |
| C  | 5.494084013  | 4.120268407  | 9.542312721  |
| H  | 5.904452879  | 4.405389818  | 8.566826206  |
| H  | 6.319432315  | 4.196014395  | 10.264116001 |
| C  | 4.975263918  | 2.675683287  | 9.508570987  |
| H  | 5.783244142  | 1.984594114  | 9.241448775  |
| H  | 4.202897920  | 2.583367501  | 8.732975587  |
| C  | 4.359723141  | 2.278680519  | 10.857037936 |
| H  | 5.140134895  | 2.265203284  | 11.631130480 |
| H  | 3.941236045  | 1.266737377  | 10.807573806 |
| C  | 3.256019041  | 3.263910697  | 11.273307684 |
| H  | 2.432459944  | 3.176735274  | 10.539042734 |
| H  | 2.842670466  | 2.977784793  | 12.247526049 |
| C  | 1.840397512  | 5.424480059  | 13.487005244 |
| H  | 1.317646948  | 4.458173424  | 13.395133783 |
| C  | 3.022372509  | 5.212888237  | 14.459070113 |
| H  | 3.720121699  | 4.464478315  | 14.069968600 |
| H  | 3.583688795  | 6.148933831  | 14.562666237 |
| C  | 2.507812087  | 4.763759278  | 15.839923180 |
| H  | 2.048149210  | 3.769775710  | 15.741921065 |
| H  | 3.354731072  | 4.650044248  | 16.525788507 |
| C  | 1.476498144  | 5.745317570  | 16.416354567 |
| H  | 1.102659634  | 5.380011171  | 17.379053239 |
| H  | 1.965333910  | 6.709678426  | 16.614363222 |
| C  | 0.312870516  | 5.966085051  | 15.438336075 |
| H  | -0.393283455 | 6.702459558  | 15.838858606 |
| H  | -0.246685130 | 5.027524868  | 15.313050000 |
| C  | 0.830329224  | 6.435622370  | 14.069619952 |
| H  | 1.328162295  | 7.404415125  | 14.196256522 |
| H  | 0.001149198  | 6.593820839  | 13.372490646 |
| C  | 2.833528719  | 7.583346677  | 11.494817445 |
| H  | 3.202986877  | 7.563522829  | 10.459575998 |
| C  | 3.998901838  | 8.032108069  | 12.399039357 |
| H  | 4.813489365  | 7.298232969  | 12.384810282 |
| H  | 3.647441045  | 8.101599734  | 13.436620836 |
| C  | 4.518190807  | 9.409612557  | 11.945097154 |
| H  | 5.327518122  | 9.736424025  | 12.607669054 |
| H  | 4.954255048  | 9.311350429  | 10.940770823 |
| C  | 3.393121242  | 10.456682706 | 11.913859405 |
| H  | 3.042159974  | 10.638766565 | 12.939808708 |
| H  | 3.778165005  | 11.412225618 | 11.540843363 |
| C  | 2.208282092  | 9.987135135  | 11.054644495 |
| H  | 2.519984203  | 9.908128492  | 10.003527823 |
| H  | 1.396961443  | 10.723544717 | 11.086604017 |
| C  | 1.685838762  | 8.619372073  | 11.525456228 |
| H  | 0.847319590  | 8.294654021  | 10.902459160 |
| H  | 1.299574750  | 8.716856876  | 12.546119352 |
| O  | -2.364446388 | 1.176889828  | 10.185979868 |
| H  | -2.954674541 | 0.498024102  | 10.535739154 |
| C  | -1.160806045 | 0.620601189  | 9.857060898  |

|   |              |              |              |
|---|--------------|--------------|--------------|
| C | -0.885926029 | -0.698542816 | 10.222337516 |
| C | -0.247395104 | 1.431291939  | 9.150661539  |
| C | 0.349380731  | -1.263197318 | 9.896785837  |
| C | 0.985156696  | 0.815334264  | 8.849071903  |
| C | 1.297176102  | -0.484775584 | 9.226223457  |
| H | -1.638243250 | -1.262927807 | 10.760790212 |
| H | 2.267570308  | -0.912270555 | 9.004654144  |
| O | 1.966918110  | 1.544797068  | 8.172350365  |
| C | 2.421796841  | 1.001956964  | 6.914210894  |
| H | 2.794817907  | -0.016227878 | 7.033590387  |
| H | 1.607891324  | 1.008859127  | 6.181261068  |
| H | 3.235212352  | 1.650311194  | 6.584498269  |
| O | 0.721463804  | -2.530422529 | 10.194315817 |
| C | -0.233133569 | -3.400434343 | 10.800878211 |
| H | -1.128142642 | -3.504681714 | 10.176964253 |
| H | 0.259991664  | -4.368517907 | 10.891172933 |
| H | -0.521076183 | -3.046667413 | 11.798836979 |
| H | 1.191197967  | 2.966106316  | 8.020779798  |
| O | 0.439488918  | 3.584048990  | 8.143221899  |
| C | -0.686217702 | 2.832182274  | 8.662710371  |
| C | -1.142483839 | 3.692660092  | 9.847097734  |
| C | -1.715458782 | 2.661584649  | 7.536674575  |
| C | -1.661903583 | 5.016573109  | 9.806064738  |
| C | -1.251736951 | 2.405888707  | 6.240510995  |
| C | -3.094094234 | 2.735265944  | 7.759651587  |
| C | -2.145886116 | 2.226482202  | 5.186326691  |
| H | -0.183880549 | 2.378086180  | 6.051181257  |
| C | -3.991010151 | 2.563106843  | 6.703374880  |
| H | -3.465760240 | 2.940458362  | 8.755610888  |
| C | -3.521159392 | 2.305789531  | 5.415081157  |
| H | -1.769159624 | 2.033304839  | 4.186428457  |
| H | -5.058812857 | 2.637694949  | 6.888250885  |
| H | -4.218881764 | 2.175757087  | 4.594778619  |
| C | -2.058436707 | 5.758720610  | 8.637203367  |
| C | -1.476737007 | 5.755852099  | 11.049329752 |
| C | -2.353599914 | 7.092748927  | 8.742717493  |
| H | -2.129956507 | 5.244495421  | 7.687882916  |
| C | -1.825968961 | 7.142089630  | 11.110845373 |
| H | -1.459672483 | 5.197624072  | 11.987708525 |
| C | -2.246309881 | 7.794905318  | 9.981662972  |
| H | -2.676330262 | 7.634599537  | 7.858741767  |
| H | -1.762592676 | 7.660207003  | 12.062522710 |
| H | -2.507577355 | 8.847760888  | 10.020854443 |
| H | -1.252503846 | 3.174649871  | 10.800322565 |

=====

**8'**

=====

|    |             |             |              |
|----|-------------|-------------|--------------|
| Ru | 1.330966177 | 3.043696384 | 13.220602005 |
| P  | 2.258970237 | 5.171757024 | 12.769570347 |
| O  | 3.558675004 | 1.524897999 | 11.918566811 |
| C  | 2.715699013 | 2.167949449 | 12.388138493 |
| C  | 3.770766290 | 5.261554424 | 11.665355148 |
| H  | 3.977376087 | 6.333666450 | 11.553363194 |
| C  | 3.460399988 | 4.686502273 | 10.262678934 |
| H  | 2.605941955 | 5.200397411 | 9.811018736  |
| H  | 3.167573255 | 3.636189367 | 10.345465315 |
| C  | 4.679169001 | 4.789865724 | 9.331895571  |
| H  | 4.429845416 | 4.336185461 | 8.365973315  |
| H  | 4.903895540 | 5.848439464 | 9.136311903  |
| C  | 5.909982849 | 4.113607140 | 9.951090741  |
| H  | 6.773615917 | 4.204506009 | 9.282924664  |
| H  | 5.711825399 | 3.039338768 | 10.071710763 |
| C  | 6.232796312 | 4.727768091 | 11.320522598 |
| H  | 6.503233269 | 5.785321594 | 11.189913515 |
| H  | 7.101804530 | 4.235297146 | 11.771325983 |
| C  | 5.036420194 | 4.627683307 | 12.285610772 |
| H  | 4.861562875 | 3.573876370 | 12.522862590 |



|   |              |              |              |
|---|--------------|--------------|--------------|
| H | 5.292772640  | 5.128959942  | 13.225705304 |
| C | 2.834154091  | 5.908198802  | 14.401294700 |
| H | 3.736229949  | 5.315748930  | 14.609619585 |
| C | 3.246013045  | 7.393766980  | 14.361789432 |
| H | 3.951489477  | 7.578164715  | 13.544381764 |
| H | 2.359533598  | 8.009270102  | 14.163448576 |
| C | 3.864671505  | 7.827399859  | 15.702681851 |
| H | 4.798219133  | 7.270819299  | 15.866083104 |
| H | 4.135330775  | 8.888072479  | 15.658394298 |
| C | 2.901733274  | 7.566154658  | 16.870365255 |
| H | 3.366053695  | 7.852261737  | 17.820238094 |
| H | 2.009779476  | 8.198539047  | 16.753123944 |
| C | 2.475691906  | 6.091708020  | 16.915375732 |
| H | 1.758400839  | 5.919632939  | 17.726362347 |
| H | 3.351777548  | 5.465047855  | 17.132865266 |
| C | 1.866619735  | 5.636686085  | 15.576835053 |
| H | 0.921701176  | 6.176199490  | 15.411397557 |
| H | 1.637430382  | 4.563647761  | 15.638747372 |
| C | 1.031472832  | 6.312001363  | 11.910240407 |
| H | 0.691444908  | 5.665718618  | 11.092023618 |
| C | 1.600647385  | 7.598540136  | 11.266002422 |
| H | 2.452745883  | 7.372374248  | 10.620226457 |
| H | 1.962373585  | 8.280410953  | 12.043624182 |
| C | 0.516879071  | 8.306632352  | 10.432113762 |
| H | 0.934265442  | 9.219450704  | 9.992455459  |
| H | 0.231149505  | 7.656274357  | 9.592866397  |
| C | -0.725207490 | 8.632650553  | 11.272468093 |
| H | -0.455594128 | 9.360610145  | 12.051030470 |
| H | -1.493679055 | 9.106674313  | 10.652045833 |
| C | -1.281768031 | 7.366723023  | 11.937278310 |
| H | -1.648045351 | 6.676786762  | 11.163116157 |
| H | -2.141606402 | 7.607805207  | 12.573405371 |
| C | -0.204286745 | 6.651214678  | 12.771071065 |
| H | -0.632875276 | 5.742932826  | 13.201288330 |
| H | 0.095945277  | 7.301844846  | 13.603258499 |
| O | -0.487083259 | 3.695998900  | 14.363281142 |
| H | -0.481105634 | 4.517313600  | 14.872652770 |
| C | -1.798383662 | 3.231350098  | 14.189740601 |
| C | -2.785590849 | 3.861836273  | 14.939109748 |
| C | -2.015460994 | 2.150951013  | 13.316897003 |
| C | -4.093394285 | 3.371643077  | 14.851894488 |
| C | -3.343982431 | 1.621790020  | 13.345359983 |
| C | -4.360637654 | 2.245744280  | 14.069466151 |
| H | -2.525533585 | 4.686192882  | 15.592814488 |
| H | -5.371715100 | 1.862628158  | 14.069639010 |
| O | -3.559745261 | 0.487045059  | 12.656223491 |
| C | -4.881325172 | -0.024643823 | 12.491602816 |
| H | -5.302733229 | -0.357625960 | 13.447193308 |
| H | -5.542737249 | 0.720991971  | 12.035344483 |
| H | -4.773568279 | -0.877186329 | 11.820624445 |
| O | -5.150152020 | 3.894187171  | 15.508416892 |
| C | -4.952998881 | 5.040011630  | 16.334476015 |
| H | -4.569691668 | 5.888697694  | 15.753999473 |
| H | -5.935578711 | 5.290515409  | 16.734517750 |
| H | -4.269273152 | 4.820636592  | 17.164182480 |
| H | -0.218665528 | 0.875162074  | 14.218862228 |
| O | 0.200853027  | 1.148153756  | 13.389264289 |
| C | -0.863398318 | 1.624437050  | 12.445898328 |
| C | -0.124155730 | 2.826738656  | 11.730574693 |
| C | -1.191035412 | 0.502589472  | 11.472417938 |
| C | -0.645253819 | -0.771418322 | 11.616987528 |
| C | -1.985469930 | 0.782685391  | 10.351594700 |
| C | -0.892894621 | -1.756964085 | 10.655649166 |
| H | -0.008404822 | -0.995818076 | 12.464596932 |
| C | -2.231755464 | -0.195202123 | 9.396445781  |
| H | -2.405571043 | 1.775732216  | 10.224967051 |
| C | -1.682331897 | -1.473282500 | 9.544332168  |
| H | -0.456427126 | -2.744236835 | 10.777077483 |

|   |              |              |              |
|---|--------------|--------------|--------------|
| H | -2.842204524 | 0.040033728  | 8.529291355  |
| H | -1.864467978 | -2.236177772 | 8.792975276  |
| H | -0.719002284 | 3.734781154  | 11.854814507 |
| C | 0.308840270  | 2.739657183  | 10.310110935 |
| C | -0.055941489 | 3.777876108  | 9.436583191  |
| C | 1.091733399  | 1.690242431  | 9.795537417  |
| C | 0.368027090  | 3.790716206  | 8.107192851  |
| C | 1.514124583  | 1.698710669  | 8.471016900  |
| C | 1.162120245  | 2.752841122  | 7.620877462  |
| H | -0.698740370 | 4.577160292  | 9.798913950  |
| H | 1.361306848  | 0.858396302  | 10.434973592 |
| H | 0.072083258  | 4.606169269  | 7.453209713  |
| H | 2.119691835  | 0.878134707  | 8.097347768  |
| H | 1.496448611  | 2.756789354  | 6.587524798  |

=====

**8'-TS**

=====

|    |              |              |              |
|----|--------------|--------------|--------------|
| Ru | 1.024673272  | 3.449648411  | 12.548401132 |
| P  | 2.394337973  | 5.416471303  | 12.728068004 |
| O  | 3.116380702  | 1.817548547  | 11.171152638 |
| C  | 2.336649419  | 2.504793058  | 11.683996029 |
| C  | 4.069168316  | 5.394188484  | 11.882126433 |
| H  | 4.497066905  | 6.390439471  | 12.052016707 |
| C  | 3.904214365  | 5.200585875  | 10.355737061 |
| H  | 3.258934862  | 5.976919595  | 9.932009788  |
| H  | 3.402345439  | 4.250534396  | 10.152479383 |
| C  | 5.262635381  | 5.205032712  | 9.636314785  |
| H  | 5.101883081  | 5.024196503  | 8.567353657  |
| H  | 5.722218177  | 6.200340848  | 9.723510986  |
| C  | 6.208674668  | 4.152894002  | 10.230908483 |
| H  | 7.176494688  | 4.173816400  | 9.717394706  |
| H  | 5.784388135  | 3.151673517  | 10.071343135 |
| C  | 6.401524733  | 4.389161208  | 11.735323978 |
| H  | 6.892237759  | 5.360750075  | 11.890132071 |
| H  | 7.065507772  | 3.630475043  | 12.164843818 |
| C  | 5.059067320  | 4.375197015  | 12.490331243 |
| H  | 4.641550928  | 3.364218353  | 12.450807445 |
| H  | 5.241397315  | 4.604164859  | 13.546351323 |
| C  | 2.808222514  | 5.677350361  | 14.543804215 |
| H  | 3.529566797  | 4.869208603  | 14.728636452 |
| C  | 3.496305414  | 7.010058614  | 14.898045911 |
| H  | 4.355826288  | 7.185911733  | 14.242523659 |
| H  | 2.793712215  | 7.835645668  | 14.730226277 |
| C  | 3.940602260  | 7.026288936  | 16.371100238 |
| H  | 4.707143691  | 6.254394826  | 16.525858426 |
| H  | 4.411396212  | 7.987298891  | 16.604931933 |
| C  | 2.754985612  | 6.765735650  | 17.311658149 |
| H  | 3.089152355  | 6.752192126  | 18.354733259 |
| H  | 2.034366308  | 7.591382173  | 17.222750478 |
| C  | 2.055862583  | 5.443564944  | 16.965345180 |
| H  | 1.189005513  | 5.281367222  | 17.616431482 |
| H  | 2.745701979  | 4.608191997  | 17.147469458 |
| C  | 1.616670436  | 5.404881758  | 15.490454535 |
| H  | 0.834359213  | 6.162111608  | 15.329088233 |
| H  | 1.183309758  | 4.418001544  | 15.274431829 |
| C  | 1.588267446  | 6.962265010  | 12.014083855 |
| H  | 1.271728522  | 6.587681065  | 11.033750925 |
| C  | 2.491937987  | 8.189399066  | 11.750910760 |
| H  | 3.384072160  | 7.908036876  | 11.185923189 |
| H  | 2.837702049  | 8.614430916  | 12.699604345 |
| C  | 1.719677781  | 9.263562036  | 10.962561576 |
| H  | 2.369091187  | 10.129268255 | 10.790178469 |
| H  | 1.462747685  | 8.862247423  | 9.971513791  |
| C  | 0.437120033  | 9.690560026  | 11.689704402 |
| H  | 0.704480389  | 10.183709319 | 12.635225189 |
| H  | -0.112623890 | 10.428826549 | 11.095433920 |
| C  | -0.453809777 | 8.477210697  | 11.990137219 |

|   |              |              |              |
|---|--------------|--------------|--------------|
| H | -0.814255543 | 8.044885883  | 11.045132228 |
| H | -1.343793478 | 8.780901766  | 12.554239398 |
| C | 0.314864469  | 7.396639708  | 12.771090528 |
| H | -0.342300577 | 6.539666039  | 12.941644332 |
| H | 0.592646169  | 7.795874748  | 13.755613394 |
| O | -0.832854420 | 4.298539866  | 13.556968870 |
| H | -0.762896835 | 4.924899841  | 14.290783271 |
| C | -2.149526921 | 4.166762206  | 13.129582233 |
| C | -3.133936586 | 4.758956490  | 13.903167707 |
| C | -2.400378470 | 3.386240171  | 11.972057953 |
| C | -4.477426849 | 4.554941506  | 13.545830094 |
| C | -3.791791718 | 3.102961288  | 11.727453776 |
| C | -4.795675958 | 3.714503796  | 12.476110452 |
| H | -2.860749457 | 5.328695266  | 14.783591007 |
| H | -5.842254772 | 3.542689217  | 12.266371485 |
| O | -4.068023027 | 2.249151954  | 10.734763877 |
| C | -5.416192492 | 2.026996748  | 10.315420379 |
| H | -6.004235030 | 1.554340424  | 11.109962140 |
| H | -5.892433055 | 2.963950061  | 10.004810704 |
| H | -5.338154870 | 1.352714081  | 9.462805862  |
| O | -5.522520869 | 5.096686438  | 14.194173012 |
| C | -5.285957826 | 5.970759548  | 15.300250973 |
| H | -4.685265287 | 6.837163135  | 14.998287190 |
| H | -6.270184756 | 6.307315918  | 15.625621676 |
| H | -4.791689128 | 5.441873205  | 16.124127192 |
| H | -0.868040752 | 1.736887004  | 13.148466448 |
| O | -0.235241675 | 1.755702673  | 12.414554842 |
| C | -1.309351890 | 2.980733931  | 11.069845984 |
| C | -0.178655812 | 3.967634047  | 10.889210015 |
| C | -1.565660036 | 2.053618370  | 9.926147701  |
| C | -1.329373022 | 0.680643823  | 9.980816790  |
| C | -2.027631194 | 2.632915555  | 8.732695727  |
| C | -1.550790500 | -0.105425930 | 8.847956272  |
| H | -0.945792158 | 0.248790794  | 10.895277357 |
| C | -2.264286731 | 1.841732561  | 7.615849995  |
| H | -2.199106257 | 3.703281663  | 8.681715223  |
| C | -2.020715017 | 0.467033328  | 7.667994696  |
| H | -1.346760975 | -1.170968862 | 8.892034766  |
| H | -2.623013502 | 2.300816675  | 6.699527185  |
| H | -2.187695099 | -0.149154474 | 6.789678090  |
| H | -0.513278019 | 4.954995567  | 11.215601610 |
| C | 0.485484766  | 4.101738659  | 9.556159438  |
| C | 0.455975083  | 5.355126821  | 8.924224439  |
| C | 1.143056611  | 3.046469282  | 8.901657796  |
| C | 1.087718277  | 5.562714944  | 7.696877219  |
| C | 1.772977669  | 3.250201522  | 7.678381047  |
| C | 1.755674096  | 4.510525187  | 7.072201183  |
| H | -0.085324796 | 6.175744568  | 9.389303181  |
| H | 1.151717053  | 2.059717813  | 9.348167544  |
| H | 1.050819378  | 6.542889387  | 7.229995760  |
| H | 2.278840828  | 2.420377663  | 7.193624723  |
| H | 2.250714011  | 4.665190446  | 6.118002004  |

9'

|    |             |             |              |
|----|-------------|-------------|--------------|
| Ru | 0.714080655 | 3.080298192 | 12.494554270 |
| P  | 1.994669011 | 5.072012321 | 12.534208208 |
| O  | 2.855632251 | 1.385858042 | 11.284250902 |
| C  | 2.046988748 | 2.098569660 | 11.703915724 |
| C  | 3.658239457 | 5.032915399 | 11.680008771 |
| H  | 4.027022899 | 6.065118707 | 11.734619117 |
| C  | 3.529664103 | 4.667529122 | 10.182335661 |
| H  | 2.857437723 | 5.365682362 | 9.672479017  |
| H  | 3.082166145 | 3.674711417 | 10.071241664 |
| C  | 4.904037018 | 4.677636618 | 9.491547595  |
| H  | 4.786024685 | 4.376922721 | 8.444233192  |
| H  | 5.298200130 | 5.703855606 | 9.481503721  |

|   |              |              |              |
|---|--------------|--------------|--------------|
| C | 5.897918528  | 3.756538181  | 10.212059589 |
| H | 6.872455147  | 3.784502388  | 9.712346422  |
| H | 5.540513184  | 2.718858963  | 10.153005288 |
| C | 6.045490673  | 4.160115573  | 11.685449758 |
| H | 6.476080301  | 5.169725037  | 11.745776488 |
| H | 6.741789833  | 3.490644837  | 12.202597509 |
| C | 4.688884643  | 4.145460456  | 12.412859050 |
| H | 4.327849439  | 3.112995432  | 12.468056989 |
| H | 4.825931349  | 4.493112653  | 13.442880002 |
| C | 2.385844103  | 5.650450981  | 14.277665257 |
| H | 3.073329511  | 4.866867950  | 14.623834047 |
| C | 3.121259310  | 7.006643794  | 14.344086472 |
| H | 3.987388446  | 7.021923315  | 13.674463117 |
| H | 2.442954918  | 7.799890756  | 14.008380567 |
| C | 3.569701851  | 7.318815153  | 15.782357789 |
| H | 4.304830403  | 6.567245377  | 16.103144421 |
| H | 4.080965285  | 8.287735721  | 15.802572161 |
| C | 2.376411984  | 7.315205698  | 16.747870875 |
| H | 2.712061125  | 7.516988301  | 17.770885371 |
| H | 1.687991020  | 8.128297493  | 16.475581972 |
| C | 1.632670063  | 5.974870512  | 16.685877277 |
| H | 0.756900057  | 5.984923815  | 17.345575317 |
| H | 2.290081203  | 5.174693827  | 17.053350079 |
| C | 1.188081059  | 5.621317542  | 15.254336258 |
| H | 0.418531200  | 6.335008277  | 14.929504985 |
| H | 0.788192958  | 4.603758982  | 15.265145894 |
| C | 1.035685028  | 6.363772684  | 11.564896788 |
| H | 0.853100416  | 5.808896587  | 10.637739184 |
| C | 1.776595288  | 7.661931628  | 11.170348745 |
| H | 2.761401865  | 7.448881888  | 10.744682677 |
| H | 1.941039896  | 8.284793832  | 12.055872776 |
| C | 0.934996844  | 8.447985635  | 10.147436842 |
| H | 1.457831319  | 9.371328122  | 9.874295008  |
| H | 0.846685851  | 7.854864186  | 9.225277193  |
| C | -0.465391276 | 8.765748934  | 10.691718106 |
| H | -0.371777911 | 9.453515298  | 11.543930819 |
| H | -1.059115474 | 9.287460525  | 9.933154269  |
| C | -1.191419577 | 7.493717907  | 11.152748596 |
| H | -1.398110613 | 6.853983963  | 10.281929178 |
| H | -2.163172268 | 7.743535388  | 11.593380069 |
| C | -0.346482399 | 6.701259530  | 12.166148418 |
| H | -0.883704154 | 5.793499198  | 12.461211013 |
| H | -0.211392596 | 7.306901536  | 13.071358764 |
| O | -1.073941906 | 3.744900698  | 13.798952637 |
| H | -0.794065300 | 4.442868639  | 14.410165418 |
| C | -1.634448890 | 2.706413792  | 14.571717615 |
| C | -2.158584726 | 3.053881526  | 15.811873499 |
| C | -1.629904175 | 1.395839260  | 14.069124041 |
| C | -2.712535030 | 2.043204591  | 16.606329573 |
| C | -2.231662445 | 0.404010698  | 14.896681351 |
| C | -2.750791002 | 0.720107550  | 16.147640064 |
| H | -2.126121495 | 4.085025201  | 16.141789933 |
| H | -3.212729703 | -0.022497655 | 16.783887504 |
| O | -2.283507959 | -0.834899645 | 14.361167881 |
| C | -2.720391764 | -1.930875652 | 15.162076873 |
| H | -2.113791367 | -2.024894914 | 16.070463184 |
| H | -3.778019274 | -1.830706439 | 15.433478091 |
| H | -2.586388101 | -2.816573938 | 14.540219004 |
| O | -3.250604112 | 2.248167610  | 17.829191970 |
| C | -3.279556441 | 3.571943208  | 18.355655953 |
| H | -3.866043071 | 4.243363647  | 17.715615120 |
| H | -3.759041837 | 3.494086257  | 19.331673897 |
| H | -2.266209644 | 3.974813723  | 18.480203089 |
| H | 2.262606783  | 2.498511213  | 14.408436623 |
| O | 1.305329953  | 2.622640297  | 14.369316969 |
| C | -0.998470469 | 1.056840109  | 12.769319933 |
| C | -1.272381208 | 1.927952063  | 11.729449067 |
| C | -0.194705093 | -0.190617822 | 12.655187863 |

|   |              |              |              |
|---|--------------|--------------|--------------|
| C | -0.613477782 | 2.220844728  | 10.445952273 |
| C | 0.840193764  | -0.449607458 | 13.565944094 |
| C | -0.507079094 | -1.148101836 | 11.680763555 |
| C | 1.581737640  | -1.624447971 | 13.464941925 |
| H | 1.065601978  | 0.296532539  | 14.321569003 |
| C | 0.230925221  | -2.327688133 | 11.588446018 |
| H | -1.353284574 | -0.981036239 | 11.020732125 |
| C | 1.283712682  | -2.564097538 | 12.474480615 |
| H | 2.394278961  | -1.810263466 | 14.161836218 |
| H | -0.022079564 | -3.064946345 | 10.831835576 |
| H | 1.861076931  | -3.481215793 | 12.401017441 |
| C | 0.082504723  | 1.317966936  | 9.599559801  |
| C | -0.654920583 | 3.590657072  | 10.063213673 |
| C | 0.708676385  | 1.772560010  | 8.452311649  |
| H | 0.136029725  | 0.271482870  | 9.863502422  |
| C | -0.015247790 | 4.032869690  | 8.894885302  |
| H | -1.273413110 | 4.283468637  | 10.627730213 |
| C | 0.668196148  | 3.130794287  | 8.092914665  |
| H | 1.232730059  | 1.063518119  | 7.818218739  |
| H | -0.085856701 | 5.077913754  | 8.607777858  |
| H | 1.152790303  | 3.465887099  | 7.180844211  |
| H | -2.042210096 | 2.662490724  | 11.951309801 |

=====  
**2b'**  
=====

|   |              |              |              |
|---|--------------|--------------|--------------|
| O | -1.874415591 | 0.502501015  | 10.051385783 |
| H | -1.929078885 | -0.448905349 | 10.209170478 |
| C | -0.923009603 | 0.746892214  | 9.100184803  |
| C | -0.159274809 | -0.293917412 | 8.549983662  |
| C | -0.745698374 | 2.078490837  | 8.716383386  |
| C | 0.797564220  | 0.015813693  | 7.581913264  |
| C | 0.219035749  | 2.352156082  | 7.724121474  |
| C | 0.991534837  | 1.338377341  | 7.159189587  |
| H | -0.321369883 | -1.312399138 | 8.885887124  |
| H | 1.737118106  | 1.525146599  | 6.397919390  |
| O | 0.307663338  | 3.663945364  | 7.352844943  |
| C | 1.274501229  | 4.027766444  | 6.379021946  |
| H | 2.292858405  | 3.786754050  | 6.711439156  |
| H | 1.085677575  | 3.534743256  | 5.415783016  |
| H | 1.182346419  | 5.108484284  | 6.255127271  |
| O | 1.602790999  | -0.904915896 | 6.975210088  |
| C | 1.461545331  | -2.268916936 | 7.340182243  |
| H | 0.453344517  | -2.646739128 | 7.119499965  |
| H | 2.188380127  | -2.818886561 | 6.739683929  |
| H | 1.679547682  | -2.429870734 | 8.405413779  |
| C | -1.584136930 | 3.161371330  | 9.314362651  |
| C | -1.085739483 | 3.901430656  | 10.325175022 |
| C | -2.953506697 | 3.299253099  | 8.747239835  |
| C | -1.684610730 | 5.061315377  | 11.010550365 |
| C | -3.128597443 | 3.462655716  | 7.364198312  |
| C | -4.086318995 | 3.239091296  | 9.572398316  |
| C | -4.406994929 | 3.592026791  | 6.823087116  |
| H | -2.251288991 | 3.507695279  | 6.725382429  |
| C | -5.363772973 | 3.361375400  | 9.029474373  |
| H | -3.950406360 | 3.099008161  | 10.639921871 |
| C | -5.528720175 | 3.542419602  | 7.653887698  |
| H | -4.528830580 | 3.730836602  | 5.751833679  |
| H | -6.233008037 | 3.312482207  | 9.680042338  |
| H | -6.525162450 | 3.639962136  | 7.231666557  |
| C | -1.380801691 | 5.277374901  | 12.366604168 |
| C | -2.511976691 | 5.995391906  | 10.360254959 |
| C | -1.911130605 | 6.363689983  | 13.060346196 |
| H | -0.726625634 | 4.575924752  | 12.878940166 |
| C | -3.036204804 | 7.084322435  | 11.051761442 |
| H | -2.734000410 | 5.866849222  | 9.307626653  |
| C | -2.745542899 | 7.271185437  | 12.405652618 |
| H | -1.669112123 | 6.504461590  | 14.110371674 |

H -3.671254859 7.794754576 10.529301140  
H -3.158695337 8.120825395 12.942100869  
H -0.100756514 3.615376452 10.691961154

=====  
**11'**  
=====

Ru 0.055741571 5.047545336 10.608583046  
P 1.915785945 6.248938142 11.634061108  
O 0.709036235 6.635877888 8.161472928  
C 0.425612905 6.019463790 9.102673598  
C 3.572002759 5.490282238 11.187348735  
H 4.353801991 6.117007791 11.636701110  
C 3.783620935 5.462621963 9.655969793  
H 3.711480349 6.467946128 9.228511544  
H 2.984504839 4.864211635 9.199485487  
C 5.147072997 4.847953963 9.294541967  
H 5.258495541 4.820485384 8.204092710  
H 5.949298335 5.496838610 9.672483983  
C 5.308154356 3.440758206 9.888924205  
H 6.299072073 3.036420505 9.654831617  
H 4.571990322 2.765294011 9.430568508  
C 5.077007400 3.453844222 11.406281171  
H 5.864962899 4.042904031 11.895664272  
H 5.146903317 2.438307704 11.813503359  
C 3.706213601 4.060241379 11.750795472  
H 2.917829518 3.433895036 11.308663783  
H 3.563340805 4.049512675 12.837715393  
C 1.823325272 6.156775701 13.501185075  
H 1.722716391 5.070708903 13.659744947  
C 3.047971138 6.591961204 14.331702914  
H 3.964910543 6.124925152 13.956345558  
H 3.186107735 7.674532376 14.246452070  
C 2.833071281 6.219325828 15.811501109  
H 2.788323010 5.123893145 15.902225260  
H 3.694589386 6.546279800 16.404155323  
C 1.537887508 6.830554054 16.371575233  
H 1.387471991 6.516041233 17.410010378  
H 1.632859402 7.925447946 16.385642967  
C 0.316963888 6.452357594 15.517202377  
H -0.586556277 6.943267376 15.896282713  
H 0.137662142 5.367572198 15.597756171  
C 0.541733937 6.828854044 14.043801221  
H 0.653797809 7.917237179 13.967182708  
H -0.329776174 6.571078238 13.429279523  
C 2.080540182 8.027009819 11.053878145  
H 2.348547396 7.880050069 9.998430788  
C 3.198651552 8.866491446 11.705472601  
H 4.150805440 8.324786596 11.723438630  
H 2.929639197 9.078685020 12.747538531  
C 3.367113837 10.202660619 10.956935887  
H 4.155448909 10.795310199 11.434949402  
H 3.704630885 9.999098920 9.930751120  
C 2.049275102 10.991955828 10.916098377  
H 1.775348932 11.288517527 11.938927342  
H 2.179876286 11.918633380 10.346076199  
C 0.915362063 10.148120973 10.314865004  
H 1.129359466 9.943193145 9.256261282  
H -0.031433221 10.700584952 10.340960325  
C 0.751897177 8.809974243 11.055845726  
H -0.039978060 8.221166307 10.592238730  
H 0.437033793 9.005153766 12.089131353  
O -2.018229930 0.786419392 9.975212916  
H -2.176251872 0.032237926 10.558654033  
C -0.717435503 0.837226507 9.580359919  
C 0.156628795 -0.209955118 9.888015273  
C -0.315390953 1.984324371 8.862884026  
C 1.503064356 -0.105193667 9.540409486

|   |              |              |              |
|---|--------------|--------------|--------------|
| C | 1.062257220  | 2.056043345  | 8.562704874  |
| C | 1.959886207  | 1.039423545  | 8.879594345  |
| H | -0.223533798 | -1.068751724 | 10.425755031 |
| H | 3.009471615  | 1.108113911  | 8.625328314  |
| O | 1.535337626  | 3.219253310  | 7.966564853  |
| C | 2.550445497  | 3.105949002  | 6.955845810  |
| H | 3.533443649  | 2.922537149  | 7.399227177  |
| H | 2.306217035  | 2.305451352  | 6.250757252  |
| H | 2.564641391  | 4.068780525  | 6.442202591  |
| O | 2.450043905  | -1.038237649 | 9.817657375  |
| C | 2.043974825  | -2.257376344 | 10.438588915 |
| H | 1.292027666  | -2.779809410 | 9.834369961  |
| H | 2.943285354  | -2.871174870 | 10.501742187 |
| H | 1.659711608  | -2.075127954 | 11.448149219 |
| H | 0.068168659  | 3.946932501  | 7.501286556  |
| O | -0.902586719 | 3.970066540  | 7.501041244  |
| C | -1.368003832 | 3.072121270  | 8.507251465  |
| C | -1.647293533 | 3.822470243  | 9.812318778  |
| C | -2.634307146 | 2.458438025  | 7.881144773  |
| C | -2.132123409 | 5.158067881  | 9.880509455  |
| C | -2.474878644 | 1.686655868  | 6.724426731  |
| C | -3.921940643 | 2.716758676  | 8.350867033  |
| C | -3.581973718 | 1.178718963  | 6.051459521  |
| H | -1.474460556 | 1.498615794  | 6.346422034  |
| C | -5.036131135 | 2.211489797  | 7.675684826  |
| H | -4.068371488 | 3.307457323  | 9.249432161  |
| C | -4.869898609 | 1.443224796  | 6.524919960  |
| H | -3.442617386 | 0.584798520  | 5.152225154  |
| H | -6.033833742 | 2.423649331  | 8.050008591  |
| H | -5.736016244 | 1.053666046  | 5.997362446  |
| C | -2.007949103 | 5.824433384  | 11.166558502 |
| C | -2.536141100 | 5.964521844  | 8.746533101  |
| C | -2.335792346 | 7.211569024  | 11.287497606 |
| H | -2.044520386 | 5.218259585  | 12.067584567 |
| C | -2.827790216 | 7.288787925  | 8.912405876  |
| H | -2.626388574 | 5.486279604  | 7.782020532  |
| C | -2.715197763 | 7.930096386  | 10.185556271 |
| H | -2.293275910 | 7.678319186  | 12.266847808 |
| H | -3.165682571 | 7.869788416  | 8.058953835  |
| H | -2.962733324 | 8.983771494  | 10.275063822 |
| O | -0.269757796 | 3.808215019  | 12.579496093 |
| H | -0.010349239 | 4.271311690  | 13.387946285 |
| C | -0.239046442 | 2.414105757  | 12.810839951 |
| C | 1.002776678  | 1.788152322  | 12.925382382 |
| C | -1.439786046 | 1.738042658  | 12.881834392 |
| C | 1.017137561  | 0.406692213  | 13.127123535 |
| H | 1.905807835  | 2.370750793  | 12.833876224 |
| C | -1.397840482 | 0.342183026  | 13.059086341 |
| C | -0.183111290 | -0.318024750 | 13.219913000 |
| O | 2.147449304  | -0.340242058 | 13.210244661 |
| O | -2.606186855 | -0.282276122 | 12.983929194 |
| H | -0.118849427 | -1.389382531 | 13.358216288 |
| C | -2.677477791 | -1.674236306 | 13.298965534 |
| H | -2.119206623 | -2.279866852 | 12.573185752 |
| H | -2.296079831 | -1.873463707 | 14.306890729 |
| H | -3.734477025 | -1.936266849 | 13.248049168 |
| C | 3.385558895  | 0.266286945  | 12.840240644 |
| H | 3.661158818  | 1.071589597  | 13.532811548 |
| H | 4.133545899  | -0.524962521 | 12.897002650 |
| H | 3.338759697  | 0.651801077  | 11.815195656 |
| H | -1.853702030 | 3.171245462  | 10.655302713 |
| H | -2.390376104 | 2.242527914  | 12.765489383 |

---

**11'-TS**

---

|    |             |             |              |
|----|-------------|-------------|--------------|
| Ru | 0.580206126 | 5.068192535 | 10.590960467 |
| P  | 2.391902060 | 6.285524503 | 11.650138045 |

|   |              |              |              |
|---|--------------|--------------|--------------|
| O | 0.884159036  | 6.861822922  | 8.238710559  |
| C | 0.765668923  | 6.157187402  | 9.155071477  |
| C | 4.150288536  | 5.852154127  | 11.157111030 |
| H | 4.800602928  | 6.520999684  | 11.737661614 |
| C | 4.404785879  | 6.126463170  | 9.658497254  |
| H | 4.208962720  | 7.176914316  | 9.418263467  |
| H | 3.708079416  | 5.532009437  | 9.058568474  |
| C | 5.854578936  | 5.788470796  | 9.267108807  |
| H | 5.990393625  | 5.953103023  | 8.191091370  |
| H | 6.536356856  | 6.484538581  | 9.776141288  |
| C | 6.231928931  | 4.348829801  | 9.645655698  |
| H | 7.279383407  | 4.150182335  | 9.390898900  |
| H | 5.622382427  | 3.643781890  | 9.062308298  |
| C | 5.983372099  | 4.091891607  | 11.139018848 |
| H | 6.656029147  | 4.723511677  | 11.736995534 |
| H | 6.218938881  | 3.051478685  | 11.393496231 |
| C | 4.523414987  | 4.396603979  | 11.513533099 |
| H | 3.870870212  | 3.714883445  | 10.965319759 |
| H | 4.364469020  | 4.197242803  | 12.578772087 |
| C | 2.337094370  | 5.937680258  | 13.502543657 |
| H | 2.217341496  | 4.842773481  | 13.518022956 |
| C | 3.593626686  | 6.280689729  | 14.336176623 |
| H | 4.502002004  | 5.871327992  | 13.886445111 |
| H | 3.723997601  | 7.367556093  | 14.372374293 |
| C | 3.442990875  | 5.740621437  | 15.771171865 |
| H | 3.394140037  | 4.642094994  | 15.736196767 |
| H | 4.334661209  | 5.994690010  | 16.355821992 |
| C | 2.180244108  | 6.285632895  | 16.456002114 |
| H | 2.072269804  | 5.854292001  | 17.457745029 |
| H | 2.284671223  | 7.371532396  | 16.591168698 |
| C | 0.927088977  | 6.006677739  | 15.612807737 |
| H | 0.041422698  | 6.453626582  | 16.080162984 |
| H | 0.746747079  | 4.921831756  | 15.570642782 |
| C | 1.090152135  | 6.544390246  | 14.181664941 |
| H | 1.199347338  | 7.635630140  | 14.221886635 |
| H | 0.193542724  | 6.342326693  | 13.592139336 |
| C | 2.330243560  | 8.140035130  | 11.335407835 |
| H | 2.644288503  | 8.192689097  | 10.283269901 |
| C | 3.302276374  | 9.008627266  | 12.159782441 |
| H | 4.321068836  | 8.607161771  | 12.129231510 |
| H | 2.986934942  | 9.002232724  | 13.210967518 |
| C | 3.296931444  | 10.462142073 | 11.650887835 |
| H | 3.981290472  | 11.067614666 | 12.256490628 |
| H | 3.683700175  | 10.483513197 | 10.622042522 |
| C | 1.881874601  | 11.060006387 | 11.676931052 |
| H | 1.540879152  | 11.132700700 | 12.720053202 |
| H | 1.892529078  | 12.080986695 | 11.278643128 |
| C | 0.899113123  | 10.184420287 | 10.885741631 |
| H | 1.172344660  | 10.195700728 | 9.820875430  |
| H | -0.118426243 | 10.588200685 | 10.951306673 |
| C | 0.907077570  | 8.731090954  | 11.387080174 |
| H | 0.218663078  | 8.131900634  | 10.788727970 |
| H | 0.527127798  | 8.702365558  | 12.415129389 |
| O | -2.694696220 | 1.667701888  | 11.284367901 |
| H | -3.117748281 | 1.084573327  | 11.927474825 |
| C | -1.805200127 | 0.948111857  | 10.534541736 |
| C | -1.493930389 | -0.362943563 | 10.925562403 |
| C | -1.234212208 | 1.566978208  | 9.409429877  |
| C | -0.627421134 | -1.122885657 | 10.144612541 |
| C | -0.447791284 | 0.711073136  | 8.592435338  |
| C | -0.124042769 | -0.590052837 | 8.953811742  |
| H | -1.946106584 | -0.763999751 | 11.825962885 |
| H | 0.502251791  | -1.221414740 | 8.339801806  |
| O | -0.015645875 | 1.223864483  | 7.384598200  |
| C | 0.837757237  | 0.448404233  | 6.535885939  |
| H | 1.771261998  | 0.198787652  | 7.049357572  |
| H | 0.327835381  | -0.460553833 | 6.201768351  |
| H | 1.048196457  | 1.085368226  | 5.675985031  |



|   |              |              |              |
|---|--------------|--------------|--------------|
| O | -0.211158953 | -2.381522189 | 10.438262520 |
| C | -0.788140612 | -3.047191906 | 11.559119227 |
| H | -1.876521601 | -3.134797022 | 11.453784570 |
| H | -0.345506782 | -4.043728399 | 11.575791992 |
| H | -0.553212154 | -2.530526955 | 12.498829294 |
| H | -0.256848867 | 2.826366309  | 7.506574299  |
| O | -0.481756303 | 3.546394113  | 8.143713281  |
| C | -1.536141651 | 3.054762536  | 9.064646098  |
| C | -1.357379369 | 3.962558948  | 10.289482433 |
| C | -2.884176668 | 3.127346192  | 8.339803797  |
| C | -1.873732466 | 5.307932959  | 10.466454118 |
| C | -2.964423156 | 2.895845475  | 6.959751844  |
| C | -4.066595028 | 3.343625343  | 9.057028262  |
| C | -4.197671150 | 2.898768851  | 6.308865905  |
| H | -2.066702593 | 2.709339454  | 6.379952273  |
| C | -5.299881777 | 3.341695733  | 8.404942338  |
| H | -4.019923201 | 3.512621710  | 10.126049839 |
| C | -5.372434688 | 3.122262905  | 7.028567215  |
| H | -4.238140176 | 2.725715148  | 5.237090558  |
| H | -6.206719487 | 3.518815591  | 8.976214548  |
| H | -6.332729819 | 3.125701214  | 6.521614790  |
| C | -1.676773793 | 5.884420556  | 11.764359059 |
| C | -2.379467850 | 6.163963048  | 9.440022268  |
| C | -2.018048029 | 7.227310479  | 12.024505646 |
| H | -1.438498994 | 5.226804821  | 12.597435645 |
| C | -2.701410368 | 7.475904548  | 9.721245675  |
| H | -2.515606774 | 5.767308193  | 8.441306716  |
| C | -2.523801441 | 8.023205479  | 11.012844110 |
| H | -1.885914022 | 7.624225340  | 13.026651837 |
| H | -3.099650855 | 8.103073124  | 8.927952506  |
| H | -2.789609148 | 9.057993378  | 11.205019416 |
| O | 0.905500076  | 2.808598734  | 11.877597519 |
| H | 0.971442501  | 2.173864692  | 12.603346868 |
| C | 1.660371273  | 2.421024953  | 10.791106697 |
| C | 1.640695987  | 3.353039562  | 9.732281785  |
| C | 2.401639568  | 1.249084222  | 10.808544574 |
| C | 2.546775908  | 3.073840737  | 8.674201071  |
| H | 0.506840919  | 3.572580535  | 8.958120448  |
| C | 3.200834622  | 0.975883014  | 9.688457016  |
| C | 3.304281840  | 1.901723887  | 8.636235554  |
| O | 2.528713532  | 3.988306937  | 7.669578050  |
| O | 3.905917611  | -0.166091408 | 9.529789935  |
| H | 3.959306470  | 1.653760295  | 7.811087496  |
| C | 3.723481901  | -1.219849529 | 10.477593625 |
| H | 4.072593764  | -0.925528911 | 11.475027401 |
| H | 2.671845953  | -1.529927807 | 10.527918885 |
| H | 4.333002401  | -2.049292494 | 10.118107188 |
| C | 3.403060027  | 3.817385763  | 6.554695744  |
| H | 3.173440579  | 2.897765290  | 6.001849323  |
| H | 3.233136978  | 4.681405693  | 5.911927745  |
| H | 4.451710466  | 3.797550734  | 6.873444720  |
| H | -1.359059239 | 3.400990310  | 11.214173358 |
| H | 2.347960040  | 0.572171384  | 11.652772853 |

=====  
**12'**  
=====

|    |             |             |              |
|----|-------------|-------------|--------------|
| Ru | 0.860260717 | 4.953192121 | 10.355764197 |
| P  | 2.486170216 | 6.189059439 | 11.478531396 |
| O  | 1.366164036 | 6.781565417 | 8.052554683  |
| C  | 1.145545073 | 6.028057570 | 8.903470646  |
| C  | 4.269472827 | 5.989057233 | 10.949021559 |
| H  | 4.805494487 | 6.747188611 | 11.537263824 |
| C  | 4.466863326 | 6.321067528 | 9.453516654  |
| H  | 4.097292989 | 7.326383826 | 9.224905250  |
| H  | 3.881574514 | 5.620872841 | 8.851126187  |
| C  | 5.949018122 | 6.223225288 | 9.052801960  |
| H  | 6.047631929 | 6.424608369 | 7.979554421  |

|   |              |              |              |
|---|--------------|--------------|--------------|
| H | 6.520982970  | 7.005730420  | 9.571483573  |
| C | 6.538210369  | 4.849919695  | 9.403920817  |
| H | 7.598381872  | 4.807266925  | 9.130045820  |
| H | 6.026622490  | 4.073070997  | 8.816918212  |
| C | 6.355319378  | 4.544232210  | 10.897243011 |
| H | 6.930550835  | 5.269612358  | 11.490488164 |
| H | 6.754381606  | 3.552718193  | 11.139998468 |
| C | 4.871807085  | 4.610174264  | 11.300180995 |
| H | 4.322745260  | 3.827983242  | 10.770305053 |
| H | 4.770729987  | 4.397916657  | 12.369557828 |
| C | 2.455008339  | 5.699633261  | 13.283920682 |
| H | 2.616203574  | 4.614917138  | 13.224529847 |
| C | 3.569761821  | 6.305495878  | 14.168294628 |
| H | 4.558016135  | 6.166408463  | 13.720627228 |
| H | 3.416470825  | 7.385399721  | 14.267198643 |
| C | 3.539057715  | 5.663492827  | 15.567624636 |
| H | 3.777125180  | 4.593966536  | 15.477014979 |
| H | 4.323267899  | 6.107814027  | 16.191191662 |
| C | 2.164511931  | 5.829229122  | 16.233667461 |
| H | 2.153391191  | 5.335247667  | 17.211636557 |
| H | 1.981267491  | 6.897276924  | 16.419229564 |
| C | 1.042498467  | 5.275633263  | 15.341222204 |
| H | 0.063798711  | 5.447440664  | 15.804700604 |
| H | 1.159414311  | 4.187008829  | 15.237902476 |
| C | 1.075450979  | 5.915560808  | 13.943332314 |
| H | 0.880460269  | 6.990779395  | 14.037798035 |
| H | 0.275133114  | 5.504969108  | 13.318090651 |
| C | 2.165695591  | 8.022314070  | 11.239652212 |
| H | 2.381761171  | 8.138597652  | 10.169120073 |
| C | 3.086709626  | 8.997673190  | 12.003161632 |
| H | 4.142222606  | 8.729083234  | 11.889880666 |
| H | 2.855930143  | 8.953732135  | 13.074335985 |
| C | 2.857732976  | 10.436791994 | 11.502758052 |
| H | 3.507498211  | 11.124820233 | 12.055654886 |
| H | 3.156903013  | 10.501375553 | 10.447023453 |
| C | 1.385822986  | 10.853905479 | 11.646690839 |
| H | 1.128348997  | 10.897721731 | 12.714855075 |
| H | 1.236884356  | 11.863344718 | 11.247207072 |
| C | 0.451164039  | 9.857275323  | 10.944063895 |
| H | 0.619636374  | 9.894925226  | 9.858442490  |
| H | -0.597136194 | 10.130328633 | 11.107928438 |
| C | 0.687823418  | 8.419103515  | 11.434578401 |
| H | 0.025281645  | 7.733767200  | 10.899145657 |
| H | 0.418528873  | 8.350431135  | 12.494627427 |
| O | -2.850397745 | 1.547276865  | 11.828111179 |
| H | -3.254002788 | 0.923790149  | 12.445725357 |
| C | -2.007918486 | 0.871205560  | 10.987197033 |
| C | -1.639948992 | -0.453620996 | 11.262333264 |
| C | -1.528963507 | 1.562165164  | 9.863917628  |
| C | -0.775348387 | -1.111666199 | 10.385957169 |
| C | -0.641892246 | 0.863908418  | 9.015740955  |
| C | -0.275040524 | -0.455438814 | 9.253906496  |
| H | -2.037380586 | -0.943360331 | 12.144052478 |
| H | 0.416419767  | -0.986590214 | 8.613946754  |
| O | -0.142238084 | 1.585814897  | 7.970786115  |
| C | 0.493753405  | 0.912367731  | 6.880984846  |
| H | 1.444687028  | 0.471113800  | 7.192698907  |
| H | -0.162703639 | 0.140917603  | 6.463767889  |
| H | 0.672710006  | 1.693162558  | 6.140095044  |
| O | -0.327086326 | -2.383270771 | 10.561687382 |
| C | -0.854945226 | -3.149697467 | 11.641557483 |
| H | -1.944810617 | -3.247649311 | 11.565788659 |
| H | -0.396859469 | -4.135901130 | 11.560464209 |
| H | -0.595429849 | -2.708026979 | 12.612568371 |
| H | -0.195683084 | 3.491301251  | 7.608814497  |
| O | 0.073416427  | 4.259221393  | 7.084172285  |
| C | -1.973643632 | 2.968730944  | 9.608075376  |
| C | -1.612489981 | 3.909699076  | 10.527660067 |

|   |              |              |              |
|---|--------------|--------------|--------------|
| C | -2.975430526 | 3.227556197  | 8.536023107  |
| C | -1.925506968 | 5.351673097  | 10.574014189 |
| C | -2.859164277 | 2.772336798  | 7.213474403  |
| C | -4.152422603 | 3.907969306  | 8.905797713  |
| C | -3.862028705 | 3.037061078  | 6.282544376  |
| H | -1.972864411 | 2.239041394  | 6.902518868  |
| C | -5.159224147 | 4.156244496  | 7.979035164  |
| H | -4.279275912 | 4.228405419  | 9.934138989  |
| C | -5.012150976 | 3.731836639  | 6.657108734  |
| H | -3.741186909 | 2.698471770  | 5.257647566  |
| H | -6.059392169 | 4.678539464  | 8.290486390  |
| H | -5.791735764 | 3.933344596  | 5.928178849  |
| C | -2.189128307 | 5.949768283  | 11.824840702 |
| C | -2.009722365 | 6.153821125  | 9.411015524  |
| C | -2.592516140 | 7.281425499  | 11.907556205 |
| H | -2.126207783 | 5.344122505  | 12.725662941 |
| C | -2.401341561 | 7.485380581  | 9.503880422  |
| H | -1.772421643 | 5.715053804  | 8.447515906  |
| C | -2.713536413 | 8.047482958  | 10.746715383 |
| H | -2.817322759 | 7.718446143  | 12.876194311 |
| H | -2.466288708 | 8.087285910  | 8.602458761  |
| H | -3.036371063 | 9.082568046  | 10.809404307 |
| O | 1.131603926  | 3.058982927  | 11.972218958 |
| H | 0.464090769  | 2.425693880  | 12.277744408 |
| C | 1.857323661  | 2.493972531  | 10.901281802 |
| C | 2.037039171  | 3.400533243  | 9.866955567  |
| C | 2.320436102  | 1.184205730  | 10.919383630 |
| C | 2.775484680  | 2.953845171  | 8.757519555  |
| H | 1.040622057  | 4.234906081  | 7.142398086  |
| C | 3.030457030  | 0.763588369  | 9.787932555  |
| C | 3.284474988  | 1.655143391  | 8.727922895  |
| O | 2.914596904  | 3.844018141  | 7.721956663  |
| O | 3.506257403  | -0.493266832 | 9.604095897  |
| H | 3.848254749  | 1.275026207  | 7.885285132  |
| C | 3.231771444  | -1.476328127 | 10.601497042 |
| H | 3.665236523  | -1.193705566 | 11.569586770 |
| H | 2.153469922  | -1.645315193 | 10.710197083 |
| H | 3.707719501  | -2.393022501 | 10.251626943 |
| C | 3.743048218  | 3.491059590  | 6.612060210  |
| H | 3.336359132  | 2.629514781  | 6.069634862  |
| H | 3.746813341  | 4.363683088  | 5.958317682  |
| H | 4.765429883  | 3.270037209  | 6.938022251  |
| H | -1.166723320 | 3.520483778  | 11.438766094 |
| H | 2.107402494  | 0.530607780  | 11.755760766 |

=====  
**Ketone**  
=====

|   |              |              |              |
|---|--------------|--------------|--------------|
| O | 5.666241803  | 2.835605522  | 8.825417798  |
| C | 4.786261233  | 2.200314417  | 9.406123018  |
| C | 3.346168385  | 2.386758328  | 9.007752742  |
| C | 2.291858657  | 1.608407737  | 9.517397638  |
| C | 3.059138749  | 3.396633012  | 8.073437728  |
| C | 0.981788657  | 1.832400290  | 9.095307385  |
| C | 1.751036150  | 3.625560135  | 7.659429343  |
| C | 0.708282776  | 2.841468871  | 8.167930613  |
| H | 2.480479057  | 0.820680779  | 10.241585549 |
| H | 3.883862819  | 3.989771109  | 7.687264233  |
| H | 0.174829340  | 1.219545156  | 9.491352272  |
| H | 1.541867814  | 4.413259707  | 6.939690186  |
| H | -0.313393251 | 3.016374109  | 7.842618632  |
| C | 5.053481413  | 1.220390907  | 10.560474050 |
| H | 4.543650676  | 0.248558121  | 10.304965239 |
| H | 4.479783449  | 1.614303689  | 11.451774738 |
| C | 6.483007600  | 0.918865248  | 10.986615999 |
| C | 7.569081640  | 1.801113751  | 10.807533147 |
| C | 6.694162328  | -0.299144275 | 11.689432788 |
| C | 8.828446185  | 1.460115505  | 11.312521673 |

|   |              |              |              |
|---|--------------|--------------|--------------|
| C | 7.945539101  | -0.628567060 | 12.205334275 |
| C | 9.024311714  | 0.253788683  | 12.014544163 |
| H | 7.434891077  | 2.733886505  | 10.254644653 |
| H | 5.860115721  | -0.995143320 | 11.838857070 |
| H | 9.661475332  | 2.150980219  | 11.152769117 |
| H | 8.079633249  | -1.574638051 | 12.749137438 |
| H | 10.005813962 | 0.000216315  | 12.406992604 |

=====  
**Z-enol**  
=====

|   |              |             |              |
|---|--------------|-------------|--------------|
| O | 5.709462707  | 3.221809437 | 8.905666030  |
| H | 5.431680476  | 3.295633644 | 7.983202316  |
| C | 4.767856176  | 2.490925858 | 9.591144092  |
| C | 5.080542086  | 1.869789833 | 10.750610383 |
| H | 4.241520065  | 1.407464263 | 11.261910686 |
| C | 3.404246066  | 2.498006205 | 9.020070052  |
| C | 2.551677959  | 1.386516756 | 9.137755142  |
| C | 2.940847544  | 3.628143417 | 8.323269481  |
| C | 1.270834647  | 1.414402546 | 8.593119255  |
| C | 1.660517817  | 3.650597376 | 7.772695150  |
| C | 0.819438664  | 2.545057338 | 7.906555669  |
| H | 2.911327981  | 0.492339096 | 9.636901248  |
| H | 3.576083322  | 4.506380125 | 8.246369247  |
| H | 0.627370747  | 0.544459607 | 8.689536756  |
| H | 1.316297341  | 4.537223391 | 7.247833954  |
| H | -0.177601808 | 2.561245328 | 7.476276740  |
| C | 6.366390177  | 1.736126799 | 11.431019805 |
| C | 7.577170018  | 2.304361377 | 10.981107768 |
| C | 6.400487912  | 0.977223960 | 12.619820054 |
| C | 8.758976270  | 2.109495163 | 11.691837467 |
| C | 7.583420915  | 0.785851269 | 13.326705646 |
| C | 8.773390202  | 1.352239728 | 12.865437363 |
| H | 7.582404865  | 2.897917624 | 10.077067548 |
| H | 5.479286121  | 0.530236076 | 12.986571623 |
| H | 9.679085619  | 2.557583572 | 11.326020013 |
| H | 7.576603692  | 0.195045218 | 14.238734451 |
| H | 9.699116889  | 1.207997444 | 13.415157771 |

=====  
**E-enol**  
=====

|   |              |              |              |
|---|--------------|--------------|--------------|
| O | 5.630753084  | 3.328370312  | 8.999000786  |
| H | 5.397548920  | 3.331359319  | 8.060613146  |
| C | 4.686816826  | 2.589326833  | 9.679219402  |
| C | 5.051982637  | 2.064872256  | 10.867684543 |
| H | 6.107206240  | 2.162821764  | 11.113175079 |
| C | 3.370759373  | 2.479034861  | 9.006768233  |
| C | 2.679381234  | 1.257609405  | 8.952919140  |
| C | 2.820618536  | 3.598454126  | 8.361066207  |
| C | 1.454875759  | 1.169035832  | 8.297919309  |
| C | 1.593627853  | 3.506799199  | 7.703337568  |
| C | 0.906470218  | 2.292974735  | 7.672489671  |
| H | 3.104438333  | 0.388485338  | 9.441845746  |
| H | 3.347380270  | 4.547832614  | 8.402673685  |
| H | 0.928670040  | 0.219200593  | 8.268428908  |
| H | 1.172652097  | 4.385000199  | 7.222243123  |
| H | -0.050332367 | 2.220526983  | 7.163435553  |
| C | 4.208881752  | 1.410141362  | 11.878666636 |
| C | 2.861712146  | 1.754477194  | 12.105939504 |
| C | 4.780953499  | 0.417518004  | 12.695744750 |
| C | 2.114590719  | 1.105255634  | 13.084885760 |
| C | 4.032633671  | -0.229897694 | 13.676821128 |
| C | 2.692079815  | 0.105543524  | 13.872609329 |
| H | 2.410183639  | 2.545445021  | 11.517059057 |
| H | 5.824203255  | 0.149633151  | 12.547848413 |
| H | 1.078112574  | 1.390461837  | 13.243887956 |
| H | 4.497380535  | -0.997251877 | 14.290185622 |

**Table S5.** Vibrational frequencies (in cm<sup>-1</sup>) of the optimized structures**1**

|         |         |         |         |         |         |
|---------|---------|---------|---------|---------|---------|
| 27.09   | 43.33   | 47.04   | 56.18   | 58.96   | 63.13   |
| 69.95   | 72.68   | 76.70   | 81.46   | 86.74   | 91.21   |
| 95.98   | 100.40  | 103.44  | 111.09  | 118.16  | 119.95  |
| 148.76  | 161.57  | 176.39  | 179.02  | 193.17  | 208.10  |
| 213.18  | 221.91  | 226.06  | 240.87  | 245.34  | 265.13  |
| 268.86  | 284.47  | 314.85  | 328.81  | 342.01  | 349.28  |
| 360.80  | 394.79  | 404.66  | 410.66  | 417.01  | 427.67  |
| 437.59  | 446.83  | 451.16  | 453.63  | 458.98  | 467.60  |
| 503.76  | 509.33  | 514.30  | 519.39  | 521.63  | 527.07  |
| 534.58  | 539.19  | 565.58  | 606.46  | 613.05  | 668.58  |
| 719.00  | 722.26  | 744.86  | 749.72  | 759.87  | 794.62  |
| 809.84  | 812.30  | 815.77  | 821.93  | 825.92  | 829.16  |
| 842.99  | 868.46  | 868.77  | 871.14  | 902.59  | 907.00  |
| 907.84  | 910.30  | 912.65  | 914.26  | 915.05  | 930.81  |
| 938.72  | 941.17  | 948.94  | 988.91  | 995.38  | 1001.54 |
| 1013.77 | 1018.97 | 1025.40 | 1028.41 | 1028.82 | 1041.82 |
| 1043.08 | 1048.02 | 1048.94 | 1049.69 | 1060.84 | 1064.30 |
| 1070.31 | 1073.91 | 1092.34 | 1093.37 | 1095.54 | 1097.56 |
| 1103.59 | 1108.00 | 1122.76 | 1140.37 | 1151.14 | 1158.63 |
| 1186.54 | 1188.23 | 1194.71 | 1206.70 | 1212.57 | 1219.02 |
| 1237.04 | 1237.82 | 1239.86 | 1266.48 | 1293.39 | 1301.55 |
| 1302.61 | 1306.75 | 1309.93 | 1312.19 | 1314.48 | 1324.62 |
| 1328.02 | 1334.81 | 1342.07 | 1346.54 | 1365.99 | 1367.38 |
| 1368.84 | 1370.51 | 1377.51 | 1379.01 | 1381.42 | 1385.14 |
| 1389.42 | 1393.53 | 1394.61 | 1395.50 | 1398.55 | 1399.23 |
| 1401.83 | 1406.75 | 1407.91 | 1492.31 | 1494.96 | 1495.76 |
| 1497.54 | 1499.24 | 1499.80 | 1500.59 | 1502.45 | 1503.94 |
| 1504.72 | 1506.62 | 1508.93 | 1511.34 | 1519.47 | 1521.42 |
| 1523.78 | 1539.42 | 1572.24 | 1585.69 | 2087.15 | 2153.72 |
| 2997.42 | 3000.55 | 3006.76 | 3015.55 | 3016.89 | 3017.77 |
| 3023.45 | 3024.03 | 3024.17 | 3026.73 | 3030.92 | 3037.94 |
| 3039.97 | 3047.63 | 3047.96 | 3051.29 | 3058.70 | 3062.15 |
| 3072.85 | 3073.06 | 3074.84 | 3076.08 | 3077.82 | 3080.70 |
| 3081.33 | 3088.01 | 3092.15 | 3097.46 | 3111.70 | 3114.21 |
| 3121.89 | 3136.25 | 3180.74 | 3205.38 | 3213.11 | 3217.35 |
| 3225.40 | 3231.29 | 3235.00 |         |         |         |

**3**

|         |         |         |         |         |         |
|---------|---------|---------|---------|---------|---------|
| 79.14   | 90.62   | 192.11  | 202.72  | 217.25  | 240.51  |
| 252.65  | 288.83  | 295.19  | 306.13  | 374.72  | 425.84  |
| 500.43  | 541.16  | 561.27  | 621.17  | 625.19  | 654.85  |
| 686.27  | 770.86  | 815.33  | 832.17  | 958.76  | 1006.06 |
| 1010.18 | 1089.83 | 1107.54 | 1179.97 | 1180.49 | 1180.84 |
| 1201.11 | 1211.02 | 1233.07 | 1250.42 | 1312.69 | 1367.81 |
| 1415.33 | 1479.98 | 1496.73 | 1505.52 | 1505.86 | 1511.55 |
| 1518.86 | 1524.85 | 1547.58 | 1653.18 | 1680.99 | 3006.82 |
| 3011.01 | 3067.39 | 3072.73 | 3142.01 | 3142.81 | 3208.98 |
| 3238.55 | 3246.88 | 3829.34 |         |         |         |

**4**

|        |        |        |        |        |        |
|--------|--------|--------|--------|--------|--------|
| 9.63   | 22.70  | 26.59  | 31.63  | 42.95  | 48.04  |
| 54.25  | 63.42  | 68.36  | 71.03  | 79.72  | 86.29  |
| 93.87  | 100.28 | 105.92 | 120.94 | 135.93 | 151.50 |
| 165.27 | 177.31 | 185.92 | 191.34 | 206.86 | 207.46 |
| 212.74 | 219.21 | 229.23 | 234.36 | 254.28 | 257.21 |
| 270.35 | 272.29 | 281.49 | 283.31 | 301.95 | 310.05 |

|         |         |         |         |         |         |
|---------|---------|---------|---------|---------|---------|
| 328.89  | 343.57  | 372.26  | 398.97  | 403.69  | 420.91  |
| 429.23  | 435.20  | 440.50  | 445.30  | 448.29  | 451.49  |
| 460.23  | 493.97  | 505.36  | 521.98  | 525.77  | 533.49  |
| 534.80  | 540.11  | 545.86  | 555.84  | 579.72  | 615.50  |
| 643.23  | 658.13  | 685.44  | 697.47  | 721.21  | 748.79  |
| 755.54  | 768.87  | 806.93  | 808.31  | 811.71  | 820.21  |
| 824.07  | 825.98  | 829.09  | 850.19  | 853.94  | 865.31  |
| 866.48  | 867.66  | 899.74  | 902.48  | 902.79  | 908.58  |
| 909.91  | 912.38  | 936.90  | 941.16  | 942.26  | 951.11  |
| 979.31  | 990.75  | 1022.49 | 1025.79 | 1026.83 | 1038.57 |
| 1043.24 | 1048.79 | 1056.62 | 1065.14 | 1069.01 | 1071.13 |
| 1088.93 | 1089.09 | 1093.31 | 1095.19 | 1100.17 | 1106.75 |
| 1113.39 | 1138.30 | 1141.26 | 1154.31 | 1159.70 | 1176.34 |
| 1176.87 | 1193.15 | 1204.68 | 1206.25 | 1211.49 | 1218.13 |
| 1218.32 | 1232.07 | 1237.67 | 1261.47 | 1267.14 | 1292.10 |
| 1296.66 | 1300.77 | 1302.02 | 1303.11 | 1305.24 | 1307.76 |
| 1310.50 | 1317.43 | 1328.84 | 1330.68 | 1337.85 | 1342.61 |
| 1364.65 | 1367.97 | 1369.34 | 1371.78 | 1374.42 | 1378.98 |
| 1380.75 | 1381.73 | 1389.19 | 1393.71 | 1394.64 | 1395.87 |
| 1397.45 | 1399.10 | 1400.29 | 1403.18 | 1410.49 | 1473.99 |
| 1481.40 | 1490.46 | 1495.02 | 1497.44 | 1499.32 | 1499.80 |
| 1500.67 | 1501.80 | 1503.09 | 1504.69 | 1506.48 | 1506.69 |
| 1508.28 | 1509.14 | 1509.99 | 1510.42 | 1511.39 | 1519.06 |
| 1520.33 | 1524.99 | 1525.53 | 1528.28 | 1603.58 | 1655.77 |
| 2066.71 | 2201.55 | 2992.69 | 2999.89 | 3019.73 | 3021.32 |
| 3022.33 | 3023.64 | 3024.96 | 3025.15 | 3028.08 | 3028.13 |
| 3029.84 | 3031.80 | 3032.17 | 3033.51 | 3035.51 | 3037.80 |
| 3039.00 | 3040.73 | 3043.74 | 3062.48 | 3070.82 | 3077.15 |
| 3081.45 | 3083.23 | 3085.70 | 3086.44 | 3087.44 | 3088.36 |
| 3088.83 | 3090.21 | 3090.84 | 3093.06 | 3093.98 | 3095.61 |
| 3101.12 | 3111.39 | 3115.16 | 3174.28 | 3178.35 | 3236.38 |
| 3240.00 | 3252.71 | 3781.40 |         |         |         |

=====  
**4-TS**  
=====

|         |         |         |         |         |         |
|---------|---------|---------|---------|---------|---------|
| -583.39 | 17.76   | 22.42   | 25.05   | 32.68   | 42.33   |
| 47.11   | 54.24   | 60.16   | 66.82   | 70.97   | 79.72   |
| 89.29   | 92.28   | 99.15   | 110.29  | 115.54  | 131.36  |
| 148.10  | 154.74  | 166.71  | 179.99  | 191.17  | 202.95  |
| 206.87  | 212.66  | 218.23  | 221.53  | 231.13  | 255.96  |
| 257.85  | 266.91  | 274.56  | 280.40  | 283.85  | 310.44  |
| 326.91  | 343.19  | 372.88  | 388.63  | 397.81  | 402.38  |
| 413.62  | 431.20  | 432.08  | 436.45  | 444.57  | 447.94  |
| 449.19  | 461.03  | 498.15  | 506.02  | 518.53  | 523.36  |
| 525.03  | 534.15  | 539.26  | 546.25  | 562.79  | 571.74  |
| 622.02  | 655.89  | 669.13  | 704.18  | 721.54  | 744.79  |
| 749.10  | 755.16  | 782.23  | 808.02  | 808.69  | 811.93  |
| 820.27  | 824.47  | 828.97  | 846.15  | 856.38  | 864.80  |
| 866.09  | 867.19  | 899.29  | 901.72  | 903.06  | 908.85  |
| 909.38  | 912.19  | 936.67  | 940.88  | 942.56  | 957.95  |
| 980.86  | 992.33  | 1022.88 | 1025.62 | 1027.16 | 1038.07 |
| 1042.86 | 1048.26 | 1056.72 | 1069.39 | 1071.20 | 1076.19 |
| 1087.66 | 1088.01 | 1092.72 | 1095.07 | 1100.15 | 1107.05 |
| 1113.47 | 1137.87 | 1140.31 | 1142.77 | 1158.57 | 1176.86 |
| 1177.54 | 1189.74 | 1205.41 | 1206.80 | 1211.30 | 1217.47 |
| 1218.26 | 1229.76 | 1237.54 | 1257.67 | 1267.06 | 1271.64 |
| 1292.17 | 1296.62 | 1301.03 | 1302.64 | 1305.04 | 1306.98 |
| 1310.50 | 1316.92 | 1328.76 | 1330.59 | 1338.28 | 1342.68 |
| 1365.33 | 1367.94 | 1369.47 | 1370.79 | 1374.61 | 1379.67 |
| 1381.28 | 1381.89 | 1384.78 | 1389.78 | 1393.79 | 1394.95 |
| 1395.86 | 1397.32 | 1399.15 | 1400.02 | 1403.40 | 1453.30 |
| 1478.64 | 1489.13 | 1493.51 | 1496.79 | 1498.89 | 1499.79 |
| 1500.94 | 1501.79 | 1502.92 | 1504.36 | 1506.12 | 1507.54 |
| 1507.95 | 1509.13 | 1509.55 | 1510.28 | 1510.70 | 1514.64 |
| 1518.46 | 1520.23 | 1524.46 | 1525.49 | 1538.61 | 1613.37 |
| 1668.87 | 1940.77 | 2077.54 | 2993.86 | 3001.79 | 3004.65 |
| 3009.16 | 3019.51 | 3022.69 | 3023.78 | 3024.90 | 3025.86 |

3028.27 3028.87 3029.27 3032.25 3034.03 3034.34  
3035.15 3035.76 3040.04 3043.03 3061.76 3070.76  
3078.32 3082.29 3083.66 3085.61 3086.60 3087.57  
3088.86 3090.28 3090.84 3091.12 3093.00 3093.72  
3096.55 3100.15 3109.23 3110.00 3170.93 3173.31  
3236.41 3244.89 3796.17

=====

5

=====

15.74 23.61 45.79 52.16 54.11 65.13  
72.45 74.17 78.19 86.50 89.63 90.37  
101.40 102.15 111.57 131.99 152.95 164.54  
174.86 178.10 181.74 202.18 208.13 210.66  
218.91 224.98 233.74 245.91 260.99 264.67  
269.24 277.71 284.66 289.07 309.78 322.30  
329.63 345.90 379.80 397.11 401.03 434.25  
438.74 442.50 445.47 446.08 449.59 452.26  
462.46 502.84 512.51 521.94 527.50 531.16  
537.66 541.69 571.29 573.40 595.55 613.33  
642.76 681.19 700.66 721.38 745.33 756.87  
795.77 809.64 810.64 811.00 821.15 825.62  
830.15 848.87 864.36 865.95 867.37 898.24  
902.84 904.96 908.84 909.33 911.18 937.14  
940.10 943.60 958.86 973.43 1024.05 1026.33  
1027.78 1038.07 1039.36 1043.20 1047.69 1056.13  
1066.40 1069.47 1085.17 1089.16 1092.17 1094.02  
1102.31 1106.42 1114.61 1115.51 1139.24 1145.23  
1157.87 1177.52 1178.24 1183.73 1201.94 1206.26  
1210.61 1216.53 1218.39 1231.42 1235.42 1238.33  
1258.55 1267.46 1292.94 1296.73 1299.13 1302.69  
1306.56 1307.35 1310.81 1320.61 1329.07 1329.37  
1336.84 1340.88 1353.27 1364.52 1366.82 1369.12  
1374.32 1377.95 1379.02 1380.90 1383.03 1391.24  
1395.44 1396.10 1396.67 1397.65 1399.10 1402.81  
1404.69 1458.36 1476.64 1487.38 1492.45 1496.73  
1499.43 1499.60 1501.13 1501.88 1502.65 1504.24  
1505.34 1506.60 1507.33 1508.65 1509.12 1511.41  
1512.75 1514.97 1518.57 1520.76 1524.15 1527.91  
1605.53 1655.90 2080.98 2973.74 3016.21 3021.01  
3024.08 3024.49 3024.69 3025.22 3026.58 3028.71  
3029.50 3031.53 3031.94 3032.86 3033.11 3036.21  
3036.37 3043.37 3058.43 3065.83 3067.25 3073.71  
3081.92 3084.17 3086.29 3086.51 3088.55 3089.45  
3090.42 3092.05 3092.82 3093.13 3094.12 3098.50  
3104.98 3113.10 3115.41 3119.52 3166.63 3167.36  
3233.22 3239.73 3796.08

=====

5-TS

=====

-35.13 2.34 16.31 19.53 23.66 31.18  
38.68 44.43 45.44 53.54 58.93 59.92  
65.90 71.44 75.46 77.15 80.78 88.97  
93.92 94.85 102.64 103.95 110.45 114.83  
121.53 148.29 155.97 165.88 176.27 177.50  
181.17 187.57 202.29 203.58 209.38 213.16  
220.94 234.26 241.08 251.37 263.28 270.53  
271.33 275.13 287.51 289.84 292.62 294.18  
310.01 327.61 335.85 342.77 347.90 383.77  
397.44 403.86 404.37 413.53 423.24 435.96  
440.93 444.06 447.48 450.05 453.40 454.62  
464.16 499.81 504.45 507.10 524.22 524.95  
530.07 534.41 537.57 539.70 567.42 575.24  
584.93 596.23 610.24 617.82 627.37 634.44  
641.13 651.01 658.79 683.58 709.14 712.59  
722.56 723.64 746.10 750.66 757.85 778.86  
792.29 802.39 809.35 810.46 814.14 821.79

|         |         |         |         |         |         |
|---------|---------|---------|---------|---------|---------|
| 825.38  | 830.65  | 847.82  | 860.21  | 864.51  | 867.58  |
| 867.85  | 877.14  | 883.71  | 886.83  | 898.09  | 903.22  |
| 905.41  | 907.83  | 910.32  | 911.14  | 932.67  | 937.21  |
| 940.29  | 943.79  | 954.58  | 959.19  | 980.97  | 984.73  |
| 992.89  | 1001.22 | 1012.00 | 1017.41 | 1018.66 | 1024.88 |
| 1026.58 | 1028.93 | 1039.52 | 1041.28 | 1043.54 | 1047.02 |
| 1054.68 | 1055.21 | 1057.36 | 1065.63 | 1068.61 | 1088.60 |
| 1089.01 | 1091.27 | 1093.20 | 1102.95 | 1104.94 | 1106.33 |
| 1114.54 | 1118.09 | 1120.80 | 1136.66 | 1140.01 | 1145.76 |
| 1158.29 | 1176.09 | 1180.25 | 1187.05 | 1197.58 | 1202.63 |
| 1203.46 | 1205.63 | 1209.83 | 1217.20 | 1218.25 | 1219.47 |
| 1222.58 | 1223.83 | 1230.00 | 1235.61 | 1236.39 | 1238.21 |
| 1255.69 | 1266.04 | 1293.17 | 1293.53 | 1297.52 | 1298.57 |
| 1302.35 | 1307.29 | 1307.96 | 1310.82 | 1320.07 | 1327.59 |
| 1329.37 | 1336.98 | 1340.94 | 1344.83 | 1348.53 | 1353.13 |
| 1364.35 | 1367.06 | 1367.30 | 1368.77 | 1370.18 | 1375.01 |
| 1378.24 | 1378.88 | 1381.54 | 1383.10 | 1391.53 | 1395.09 |
| 1395.78 | 1396.72 | 1397.22 | 1398.83 | 1401.97 | 1403.97 |
| 1441.88 | 1456.41 | 1477.75 | 1481.58 | 1486.19 | 1489.01 |
| 1493.56 | 1498.83 | 1499.09 | 1499.67 | 1501.28 | 1502.06 |
| 1502.17 | 1503.18 | 1505.40 | 1505.96 | 1507.08 | 1508.75 |
| 1509.26 | 1511.53 | 1513.06 | 1516.71 | 1518.45 | 1521.52 |
| 1523.62 | 1528.17 | 1533.28 | 1539.92 | 1614.39 | 1617.17 |
| 1632.03 | 1649.45 | 1654.60 | 1658.82 | 1679.34 | 2072.62 |
| 2940.56 | 3013.55 | 3014.36 | 3020.47 | 3022.66 | 3023.13 |
| 3023.43 | 3025.75 | 3027.48 | 3028.89 | 3030.00 | 3031.43 |
| 3033.08 | 3034.69 | 3035.94 | 3041.36 | 3042.63 | 3055.31 |
| 3064.77 | 3071.40 | 3077.77 | 3079.59 | 3081.07 | 3082.86 |
| 3084.96 | 3085.33 | 3086.43 | 3088.16 | 3088.32 | 3089.38 |
| 3091.24 | 3092.59 | 3097.41 | 3106.71 | 3113.01 | 3115.70 |
| 3123.17 | 3151.16 | 3154.61 | 3164.82 | 3171.00 | 3186.98 |
| 3187.71 | 3194.74 | 3194.87 | 3206.54 | 3211.22 | 3216.01 |
| 3233.69 | 3237.48 | 3238.66 | 3270.66 | 3690.51 | 3807.56 |

---

6

---

|         |         |         |         |         |         |
|---------|---------|---------|---------|---------|---------|
| 10.28   | 15.60   | 25.37   | 30.92   | 34.77   | 39.17   |
| 42.07   | 51.27   | 57.77   | 62.67   | 66.37   | 71.16   |
| 76.25   | 80.09   | 84.32   | 88.78   | 95.85   | 96.73   |
| 101.46  | 105.95  | 108.93  | 113.87  | 120.18  | 141.63  |
| 148.46  | 156.53  | 169.11  | 171.80  | 176.69  | 179.41  |
| 183.01  | 187.64  | 200.37  | 209.61  | 218.29  | 220.70  |
| 230.68  | 235.56  | 250.24  | 256.93  | 265.61  | 267.28  |
| 274.27  | 279.19  | 289.95  | 295.42  | 304.13  | 308.87  |
| 312.71  | 323.94  | 330.26  | 335.89  | 346.69  | 385.83  |
| 399.80  | 402.69  | 403.15  | 413.64  | 429.32  | 434.62  |
| 439.32  | 442.15  | 446.50  | 450.27  | 451.49  | 454.17  |
| 462.92  | 505.27  | 505.89  | 512.09  | 522.74  | 529.45  |
| 530.26  | 534.81  | 537.87  | 541.11  | 554.15  | 578.08  |
| 583.13  | 597.71  | 607.09  | 613.11  | 624.80  | 633.72  |
| 636.35  | 650.14  | 663.66  | 679.47  | 708.40  | 717.49  |
| 721.18  | 724.13  | 745.86  | 751.54  | 756.34  | 786.59  |
| 792.43  | 806.73  | 809.68  | 810.74  | 813.59  | 822.06  |
| 826.10  | 830.21  | 844.32  | 863.82  | 865.84  | 867.07  |
| 867.61  | 873.71  | 876.34  | 899.16  | 903.36  | 905.24  |
| 908.30  | 908.67  | 910.34  | 912.10  | 937.11  | 940.68  |
| 941.21  | 943.24  | 955.44  | 961.59  | 976.97  | 992.04  |
| 994.72  | 1010.17 | 1011.23 | 1015.44 | 1018.55 | 1025.25 |
| 1027.38 | 1029.06 | 1039.42 | 1040.07 | 1043.60 | 1047.24 |
| 1052.77 | 1056.58 | 1056.86 | 1068.10 | 1070.68 | 1088.37 |
| 1090.86 | 1091.84 | 1093.97 | 1101.56 | 1106.78 | 1106.96 |
| 1114.48 | 1118.15 | 1119.64 | 1136.38 | 1140.40 | 1145.74 |
| 1159.41 | 1178.23 | 1179.54 | 1188.31 | 1199.11 | 1202.96 |
| 1205.33 | 1209.77 | 1210.55 | 1217.77 | 1218.13 | 1221.82 |
| 1222.53 | 1223.70 | 1230.35 | 1237.69 | 1238.49 | 1240.21 |
| 1252.99 | 1267.38 | 1292.82 | 1294.96 | 1296.33 | 1299.70 |
| 1302.91 | 1307.16 | 1308.45 | 1311.70 | 1320.32 | 1328.68 |



|         |         |         |         |         |         |
|---------|---------|---------|---------|---------|---------|
| 1330.95 | 1334.90 | 1337.74 | 1341.66 | 1342.22 | 1346.89 |
| 1365.06 | 1367.78 | 1369.58 | 1369.93 | 1371.18 | 1374.12 |
| 1377.05 | 1380.17 | 1380.92 | 1384.37 | 1391.23 | 1394.56 |
| 1394.84 | 1395.96 | 1397.14 | 1398.37 | 1402.23 | 1405.13 |
| 1436.39 | 1453.07 | 1478.44 | 1482.56 | 1483.31 | 1487.87 |
| 1493.60 | 1497.72 | 1497.85 | 1499.46 | 1500.66 | 1501.13 |
| 1502.20 | 1503.11 | 1504.50 | 1505.37 | 1507.45 | 1507.57 |
| 1510.53 | 1512.91 | 1513.34 | 1517.17 | 1518.55 | 1521.69 |
| 1525.52 | 1527.95 | 1532.70 | 1540.04 | 1612.90 | 1617.33 |
| 1628.45 | 1644.51 | 1647.52 | 1657.26 | 1658.60 | 2061.24 |
| 2954.76 | 3013.55 | 3017.64 | 3020.49 | 3021.72 | 3021.79 |
| 3022.79 | 3023.31 | 3024.55 | 3026.40 | 3027.79 | 3028.65 |
| 3030.27 | 3032.63 | 3034.13 | 3041.83 | 3047.90 | 3056.35 |
| 3065.21 | 3070.99 | 3077.77 | 3078.15 | 3078.62 | 3079.45 |
| 3083.17 | 3083.52 | 3084.03 | 3085.76 | 3086.40 | 3087.82 |
| 3088.74 | 3090.84 | 3094.37 | 3096.42 | 3112.21 | 3116.25 |
| 3119.93 | 3122.20 | 3157.01 | 3157.21 | 3164.48 | 3177.52 |
| 3183.78 | 3186.79 | 3193.75 | 3201.82 | 3203.88 | 3210.17 |
| 3213.47 | 3226.65 | 3232.93 | 3234.08 | 3661.07 | 3792.22 |

=====

**6-TS**

=====

|         |         |         |         |         |         |
|---------|---------|---------|---------|---------|---------|
| -405.77 | 14.29   | 17.94   | 34.88   | 36.79   | 39.46   |
| 47.62   | 50.94   | 53.92   | 58.39   | 62.63   | 67.36   |
| 69.04   | 70.74   | 73.67   | 84.56   | 88.59   | 92.39   |
| 96.69   | 105.54  | 107.32  | 110.02  | 128.33  | 129.73  |
| 144.09  | 152.63  | 157.45  | 167.74  | 172.82  | 182.04  |
| 188.54  | 204.30  | 204.85  | 208.47  | 214.43  | 219.59  |
| 225.35  | 231.92  | 234.81  | 248.07  | 255.22  | 259.21  |
| 262.07  | 273.45  | 283.94  | 286.25  | 287.88  | 294.19  |
| 308.89  | 316.60  | 327.08  | 342.37  | 347.53  | 374.92  |
| 383.93  | 394.80  | 399.99  | 417.03  | 424.69  | 430.46  |
| 435.27  | 438.35  | 444.50  | 446.84  | 450.85  | 454.95  |
| 460.82  | 465.70  | 501.09  | 503.73  | 520.85  | 522.81  |
| 524.90  | 526.57  | 533.34  | 538.54  | 548.60  | 560.77  |
| 581.25  | 581.83  | 599.70  | 607.72  | 626.45  | 632.75  |
| 645.77  | 650.27  | 662.58  | 681.94  | 714.26  | 721.05  |
| 721.76  | 734.59  | 741.68  | 752.15  | 760.25  | 765.96  |
| 790.85  | 798.29  | 807.57  | 809.24  | 810.98  | 822.64  |
| 824.64  | 829.79  | 840.16  | 856.50  | 866.11  | 866.50  |
| 867.93  | 870.02  | 877.93  | 892.38  | 901.08  | 903.21  |
| 905.33  | 907.77  | 909.43  | 912.26  | 928.68  | 936.29  |
| 939.49  | 943.65  | 958.58  | 961.04  | 978.32  | 985.19  |
| 994.36  | 1004.34 | 1005.21 | 1007.79 | 1015.31 | 1018.17 |
| 1023.80 | 1026.41 | 1027.11 | 1040.11 | 1044.67 | 1051.11 |
| 1051.56 | 1057.07 | 1058.93 | 1067.69 | 1071.29 | 1077.71 |
| 1088.58 | 1090.53 | 1093.97 | 1097.74 | 1099.99 | 1105.07 |
| 1112.87 | 1114.83 | 1122.05 | 1127.21 | 1136.58 | 1142.63 |
| 1157.83 | 1162.17 | 1173.93 | 1176.72 | 1188.77 | 1200.29 |
| 1201.55 | 1202.92 | 1205.52 | 1211.38 | 1214.05 | 1217.25 |
| 1217.56 | 1226.24 | 1229.66 | 1230.64 | 1234.92 | 1250.08 |
| 1263.58 | 1267.78 | 1271.24 | 1292.19 | 1298.51 | 1299.95 |
| 1303.48 | 1304.97 | 1307.41 | 1308.76 | 1319.67 | 1324.97 |
| 1331.18 | 1336.95 | 1339.95 | 1342.98 | 1344.82 | 1364.40 |
| 1365.66 | 1367.23 | 1369.47 | 1370.86 | 1372.40 | 1374.17 |
| 1379.27 | 1383.04 | 1384.10 | 1384.42 | 1392.05 | 1394.13 |
| 1394.60 | 1395.37 | 1396.75 | 1397.50 | 1398.95 | 1403.63 |
| 1410.53 | 1451.54 | 1462.14 | 1472.80 | 1486.10 | 1490.24 |
| 1492.50 | 1496.29 | 1497.27 | 1498.06 | 1499.17 | 1499.57 |
| 1500.68 | 1502.38 | 1503.80 | 1504.49 | 1506.32 | 1507.02 |
| 1508.47 | 1508.68 | 1510.23 | 1510.76 | 1515.90 | 1518.89 |
| 1520.37 | 1520.59 | 1525.04 | 1528.36 | 1540.08 | 1584.84 |
| 1605.84 | 1637.14 | 1642.79 | 1645.54 | 1657.31 | 2040.23 |
| 2990.96 | 3006.44 | 3013.14 | 3015.36 | 3018.81 | 3019.35 |
| 3022.12 | 3026.92 | 3027.49 | 3027.95 | 3030.29 | 3030.74 |
| 3033.74 | 3037.60 | 3039.68 | 3040.34 | 3046.25 | 3053.34 |
| 3067.41 | 3068.92 | 3073.54 | 3076.45 | 3077.31 | 3080.02 |

3081.51 3083.53 3084.93 3085.14 3085.45 3089.36  
3091.02 3094.57 3101.26 3101.82 3113.29 3114.70  
3153.15 3165.64 3166.40 3181.10 3182.04 3186.42  
3190.58 3198.82 3199.51 3211.08 3213.10 3217.39  
3221.31 3223.53 3242.31 3266.35 3795.30 3834.60

=====

7

=====

14.93 19.96 31.77 34.08 41.94 48.67  
49.61 54.94 60.45 66.96 71.86 72.65  
78.46 82.10 86.84 87.02 93.77 98.51  
103.85 113.60 119.10 133.91 135.95 144.69  
154.74 159.07 170.72 177.43 186.00 188.40  
204.78 207.32 212.20 219.20 221.47 222.63  
237.12 238.41 256.58 261.34 263.52 268.86  
275.70 277.73 289.49 291.37 301.40 308.61  
328.12 338.26 343.11 374.61 385.54 391.98  
399.93 407.19 419.89 422.98 430.68 437.77  
443.11 447.77 449.84 457.28 461.38 465.75  
471.22 494.78 500.34 503.88 520.35 524.32  
526.15 530.86 535.35 549.34 551.06 562.88  
577.92 595.30 601.02 618.30 628.30 633.67  
639.50 663.98 690.64 710.63 715.45 718.94  
725.58 736.90 738.93 752.95 767.78 789.60  
793.30 808.51 810.56 812.21 823.46 823.65  
829.64 833.19 840.92 859.40 867.57 868.25  
869.08 870.35 879.77 887.38 901.21 902.44  
904.30 906.41 909.75 912.51 934.00 937.02  
941.24 942.82 946.18 959.84 981.34 988.90  
1001.21 1003.49 1007.94 1012.83 1018.38 1023.35  
1025.74 1027.33 1029.10 1039.86 1045.29 1045.79  
1048.27 1054.86 1055.63 1066.79 1067.27 1070.22  
1090.97 1091.02 1094.27 1094.64 1095.32 1100.08  
1105.45 1111.89 1120.64 1123.73 1136.16 1136.39  
1144.65 1157.56 1175.36 1175.88 1198.83 1200.82  
1201.95 1202.86 1205.31 1210.71 1213.02 1217.11  
1220.79 1223.78 1225.98 1231.11 1233.58 1250.21  
1257.06 1262.13 1271.22 1291.76 1297.41 1298.79  
1302.83 1305.09 1307.29 1308.56 1318.06 1323.12  
1332.06 1335.82 1339.51 1341.57 1346.35 1364.66  
1364.93 1367.34 1368.93 1369.49 1373.49 1374.47  
1379.09 1381.05 1384.60 1390.47 1392.13 1393.75  
1394.53 1395.59 1396.15 1398.18 1399.09 1403.06  
1404.64 1439.33 1467.81 1474.83 1480.99 1490.99  
1493.38 1494.93 1497.56 1499.70 1500.51 1501.05  
1502.06 1502.79 1503.57 1505.39 1505.76 1506.81  
1508.37 1509.23 1511.00 1513.54 1516.81 1519.83  
1522.03 1523.70 1526.10 1529.49 1543.07 1582.76  
1595.23 1638.50 1642.50 1658.08 1662.00 2023.70  
2975.77 3005.44 3014.15 3016.98 3019.96 3023.44  
3025.11 3027.89 3028.69 3028.87 3030.08 3032.60  
3037.55 3039.12 3041.11 3041.61 3046.47 3053.02  
3063.34 3070.15 3074.24 3075.07 3075.84 3077.60  
3083.10 3084.17 3085.96 3086.13 3086.61 3090.82  
3093.09 3115.03 3116.24 3117.89 3120.38 3123.86  
3126.65 3138.64 3177.83 3180.54 3181.43 3186.70  
3188.98 3190.40 3196.94 3202.73 3204.31 3212.20  
3216.09 3221.69 3251.73 3263.52 3764.77 3808.03

=====

7-TS

=====

-38.62 4.21 9.99 22.10 29.40 42.06  
45.71 47.59 56.81 59.25 61.90 66.91  
73.41 81.48 84.03 85.49 94.88 95.41  
99.65 105.78 112.88 124.78 137.45 148.90  
158.54 164.49 172.00 174.12 188.41 194.75

|         |         |         |         |         |         |
|---------|---------|---------|---------|---------|---------|
| 197.97  | 208.53  | 216.62  | 218.80  | 220.79  | 228.32  |
| 242.24  | 248.25  | 252.63  | 257.94  | 259.93  | 268.60  |
| 270.34  | 275.75  | 288.71  | 294.39  | 297.60  | 314.57  |
| 316.13  | 329.60  | 341.73  | 345.68  | 374.49  | 392.48  |
| 396.43  | 404.14  | 409.72  | 415.75  | 421.56  | 425.61  |
| 432.07  | 436.95  | 447.37  | 448.34  | 452.75  | 455.19  |
| 459.93  | 487.76  | 491.21  | 503.68  | 518.35  | 522.67  |
| 529.80  | 530.50  | 545.88  | 552.07  | 570.51  | 576.46  |
| 591.80  | 605.72  | 611.75  | 629.42  | 632.58  | 636.04  |
| 641.00  | 661.23  | 694.37  | 695.90  | 714.67  | 716.96  |
| 719.09  | 745.98  | 746.81  | 749.61  | 780.29  | 785.25  |
| 789.42  | 807.83  | 810.52  | 811.48  | 821.31  | 828.34  |
| 830.17  | 842.90  | 856.36  | 862.29  | 863.80  | 864.54  |
| 866.33  | 868.57  | 887.59  | 899.10  | 905.13  | 905.84  |
| 911.41  | 911.93  | 913.14  | 935.17  | 937.58  | 941.29  |
| 942.47  | 944.92  | 962.42  | 978.73  | 987.39  | 998.57  |
| 1006.63 | 1007.53 | 1015.36 | 1016.83 | 1020.46 | 1024.11 |
| 1026.22 | 1027.60 | 1029.34 | 1042.52 | 1046.55 | 1047.95 |
| 1062.39 | 1063.30 | 1066.06 | 1071.28 | 1074.54 | 1081.37 |
| 1093.12 | 1095.68 | 1097.68 | 1104.66 | 1107.86 | 1111.06 |
| 1113.41 | 1118.40 | 1125.56 | 1129.92 | 1136.88 | 1145.99 |
| 1154.55 | 1156.24 | 1175.75 | 1179.68 | 1193.61 | 1198.45 |
| 1199.12 | 1202.35 | 1207.83 | 1208.29 | 1212.99 | 1219.50 |
| 1220.17 | 1226.69 | 1228.66 | 1237.41 | 1238.52 | 1242.38 |
| 1250.86 | 1265.16 | 1273.83 | 1295.59 | 1301.33 | 1303.22 |
| 1304.56 | 1307.66 | 1311.27 | 1313.56 | 1314.56 | 1321.75 |
| 1327.08 | 1335.84 | 1339.77 | 1343.91 | 1346.68 | 1349.13 |
| 1351.22 | 1368.37 | 1369.91 | 1370.50 | 1371.37 | 1372.16 |
| 1381.44 | 1383.02 | 1385.75 | 1389.16 | 1391.31 | 1393.96 |
| 1395.57 | 1396.35 | 1397.38 | 1398.90 | 1400.95 | 1401.98 |
| 1406.65 | 1408.54 | 1462.91 | 1477.11 | 1486.43 | 1488.98 |
| 1493.24 | 1496.22 | 1496.62 | 1498.43 | 1500.01 | 1501.07 |
| 1501.44 | 1502.96 | 1504.21 | 1505.97 | 1506.89 | 1507.53 |
| 1508.18 | 1509.40 | 1510.63 | 1511.12 | 1515.99 | 1518.20 |
| 1520.21 | 1522.63 | 1534.74 | 1538.22 | 1538.85 | 1617.79 |
| 1630.19 | 1639.39 | 1654.08 | 1658.52 | 1665.72 | 2038.33 |
| 2932.50 | 3016.64 | 3020.99 | 3022.04 | 3022.60 | 3023.50 |
| 3026.32 | 3029.65 | 3030.85 | 3031.18 | 3031.92 | 3032.61 |
| 3035.02 | 3041.85 | 3043.40 | 3048.08 | 3058.90 | 3059.54 |
| 3062.09 | 3065.70 | 3074.38 | 3077.53 | 3079.98 | 3081.13 |
| 3085.17 | 3085.47 | 3085.58 | 3086.74 | 3087.52 | 3088.73 |
| 3090.20 | 3092.16 | 3093.35 | 3099.07 | 3104.33 | 3106.93 |
| 3110.58 | 3115.65 | 3161.71 | 3166.90 | 3170.73 | 3180.12 |
| 3180.25 | 3187.60 | 3192.51 | 3197.07 | 3207.61 | 3208.16 |
| 3211.26 | 3242.97 | 3252.19 | 3296.32 | 3804.34 | 3806.09 |

=====

8

=====

|        |        |        |        |        |        |
|--------|--------|--------|--------|--------|--------|
| 13.09  | 22.56  | 25.79  | 33.72  | 41.05  | 47.09  |
| 55.23  | 58.08  | 60.91  | 62.78  | 67.12  | 72.44  |
| 75.01  | 80.25  | 87.81  | 90.19  | 94.13  | 100.88 |
| 103.24 | 112.04 | 123.26 | 131.34 | 143.63 | 151.56 |
| 155.95 | 166.01 | 178.36 | 186.94 | 191.80 | 199.49 |
| 205.43 | 212.95 | 215.67 | 220.84 | 226.76 | 231.21 |
| 235.64 | 242.04 | 247.86 | 253.81 | 263.00 | 272.22 |
| 272.82 | 279.62 | 285.48 | 292.18 | 310.49 | 316.06 |
| 317.83 | 330.68 | 347.36 | 393.58 | 398.63 | 401.07 |
| 411.35 | 417.27 | 418.95 | 421.62 | 425.41 | 437.95 |
| 442.03 | 447.97 | 449.99 | 454.82 | 457.73 | 473.54 |
| 484.70 | 496.71 | 521.64 | 525.54 | 530.05 | 532.51 |
| 537.67 | 544.72 | 554.65 | 577.58 | 587.79 | 606.65 |
| 608.91 | 613.66 | 617.50 | 630.81 | 634.13 | 639.31 |
| 650.50 | 678.57 | 695.31 | 703.75 | 714.38 | 716.35 |
| 720.55 | 743.96 | 747.64 | 749.70 | 776.75 | 778.01 |
| 794.84 | 808.73 | 810.83 | 813.27 | 825.65 | 828.79 |
| 833.11 | 842.64 | 847.19 | 864.83 | 865.32 | 867.10 |
| 867.60 | 868.89 | 895.85 | 900.85 | 905.07 | 905.29 |

906.78 912.85 912.95 915.27 938.17 941.08  
 942.14 945.24 947.54 970.12 983.78 987.94  
 1003.34 1009.80 1011.73 1014.32 1016.11 1024.63  
 1027.11 1030.07 1040.12 1042.41 1047.20 1048.45  
 1060.88 1063.15 1066.54 1070.61 1075.96 1093.56  
 1093.72 1095.90 1097.65 1104.24 1109.69 1117.31  
 1118.77 1122.85 1125.07 1139.86 1145.36 1157.62  
 1163.46 1173.33 1175.91 1178.98 1200.23 1201.11  
 1203.55 1206.83 1209.81 1211.55 1215.42 1220.25  
 1221.25 1224.45 1226.63 1236.99 1238.87 1240.20  
 1257.14 1264.45 1270.46 1295.78 1297.04 1300.89  
 1301.75 1306.28 1308.13 1309.32 1314.09 1321.44  
 1325.85 1333.64 1340.15 1342.58 1345.14 1349.83  
 1357.34 1366.85 1369.26 1370.35 1371.44 1371.63  
 1376.22 1381.09 1382.70 1386.24 1391.16 1394.71  
 1395.13 1396.33 1397.70 1398.18 1401.14 1404.69  
 1405.55 1417.10 1467.91 1488.74 1490.77 1493.45  
 1495.23 1495.67 1498.69 1500.08 1501.06 1501.79  
 1503.22 1503.88 1506.59 1507.67 1508.52 1509.14  
 1509.32 1510.52 1511.54 1513.74 1518.10 1520.56  
 1521.96 1523.95 1535.58 1539.13 1553.72 1623.69  
 1628.40 1639.40 1652.91 1659.35 1680.56 2040.64  
 2983.70 3018.53 3020.36 3021.72 3021.91 3022.99  
 3024.05 3028.15 3028.97 3029.29 3030.64 3031.68  
 3040.02 3041.24 3045.45 3047.89 3050.72 3057.17  
 3059.75 3061.84 3075.45 3078.93 3082.61 3083.00  
 3084.48 3085.19 3086.24 3086.50 3087.38 3089.64  
 3093.28 3095.55 3101.54 3104.93 3106.09 3113.04  
 3118.98 3129.53 3163.41 3164.77 3175.37 3182.96  
 3185.36 3189.24 3195.89 3198.90 3209.49 3209.65  
 3212.12 3217.51 3252.87 3262.87 3762.72 3825.54

=====

**8-TS**

=====

-139.44 11.48 19.25 25.28 33.23 38.66  
 46.58 52.83 54.56 58.20 63.54 64.95  
 70.37 73.22 80.95 87.08 91.91 95.07  
 100.28 105.07 113.65 118.03 128.09 134.18  
 143.31 149.83 175.41 177.76 179.86 188.60  
 193.61 197.87 202.08 206.67 215.20 216.68  
 222.53 228.83 238.12 240.02 246.35 251.19  
 254.33 265.55 269.51 272.40 275.93 281.80  
 311.49 315.62 327.95 346.00 376.98 392.02  
 396.72 407.54 412.99 417.13 420.82 429.32  
 435.31 447.05 449.09 454.07 456.09 464.19  
 486.12 490.55 493.89 504.76 517.38 525.56  
 527.05 530.51 536.28 537.32 545.58 568.09  
 575.31 594.84 601.49 612.93 629.71 633.22  
 650.14 658.26 675.35 701.88 706.75 711.27  
 712.87 724.25 737.40 744.23 751.80 774.24  
 782.87 790.43 807.22 808.61 809.89 825.27  
 827.91 833.37 841.67 845.97 858.37 860.13  
 865.97 866.97 867.36 870.94 901.61 904.25  
 907.45 912.11 913.02 914.31 927.36 929.22  
 936.98 938.82 944.89 950.73 962.97 983.23  
 983.53 1003.81 1006.70 1012.70 1015.44 1015.68  
 1024.25 1026.40 1028.98 1043.34 1048.47 1049.13  
 1051.92 1060.77 1063.55 1072.02 1074.03 1076.28  
 1095.09 1097.78 1099.48 1099.55 1102.58 1107.87  
 1110.47 1116.40 1121.80 1126.84 1136.35 1142.12  
 1143.59 1156.34 1173.03 1176.37 1200.08 1202.06  
 1205.35 1205.64 1209.30 1215.48 1216.62 1219.08  
 1220.70 1226.80 1229.80 1234.74 1236.90 1251.16  
 1261.14 1263.16 1291.77 1294.39 1297.01 1300.90  
 1305.50 1306.97 1308.60 1310.17 1312.77 1318.04  
 1323.66 1331.65 1339.04 1340.63 1348.25 1353.37  
 1366.50 1366.74 1368.78 1369.14 1369.99 1371.09

1374.31 1379.51 1382.65 1384.44 1389.52 1392.93  
1394.56 1396.92 1397.25 1398.48 1399.45 1402.85  
1404.32 1436.15 1472.18 1481.81 1486.84 1490.10  
1495.78 1496.36 1497.53 1499.35 1500.30 1501.58  
1502.86 1503.51 1505.80 1506.83 1508.06 1508.87  
1509.46 1509.87 1512.41 1512.83 1520.25 1521.31  
1524.80 1525.82 1531.08 1535.97 1542.94 1594.25  
1626.23 1630.73 1646.43 1651.26 1672.90 2044.50  
3003.79 3023.93 3026.08 3029.67 3032.35 3033.24  
3033.97 3037.27 3039.21 3039.75 3041.63 3042.29  
3047.50 3049.01 3049.86 3054.00 3056.11 3061.74  
3064.83 3067.55 3078.26 3085.93 3086.17 3088.73  
3089.06 3092.74 3093.82 3094.19 3095.96 3098.09  
3101.23 3103.33 3109.19 3113.91 3116.27 3119.62  
3126.45 3147.76 3171.76 3179.33 3181.29 3181.33  
3189.36 3192.28 3199.01 3201.38 3210.41 3212.50  
3220.34 3238.82 3241.56 3251.31 3794.64 3811.41

=====

9

=====

16.59 20.88 32.80 35.72 39.91 46.11  
49.84 55.12 58.59 64.72 69.96 79.83  
81.86 87.93 91.11 93.82 96.55 99.55  
110.41 116.14 124.72 129.71 136.56 139.48  
162.49 165.74 173.62 179.64 182.38 192.75  
197.87 203.55 210.73 215.48 218.34 221.35  
226.37 234.77 243.22 255.59 263.06 264.71  
275.72 279.12 287.17 288.54 296.38 318.47  
321.84 329.40 336.67 349.87 375.06 399.24  
405.26 411.08 422.85 425.36 427.41 432.59  
439.43 440.93 445.58 448.96 455.23 459.59  
478.31 506.76 516.19 518.38 521.79 524.55  
532.08 533.83 534.48 548.20 562.53 569.26  
580.11 589.72 605.81 625.60 628.10 631.27  
638.46 649.91 664.84 706.34 711.01 718.43  
719.44 726.54 743.83 749.14 753.77 778.54  
785.11 803.40 811.62 815.34 821.36 825.10  
825.84 829.76 839.48 855.34 861.45 865.02  
865.43 866.27 872.60 898.75 902.97 904.99  
910.58 911.26 915.44 929.88 932.86 938.83  
942.08 945.34 950.02 961.99 969.40 982.30  
992.56 997.61 1007.11 1010.66 1013.71 1020.22  
1021.83 1022.63 1027.52 1028.27 1040.03 1045.91  
1047.23 1051.82 1052.43 1059.62 1063.82 1073.19  
1080.07 1086.65 1092.15 1094.87 1103.61 1109.21  
1111.21 1112.75 1115.89 1122.75 1140.81 1142.89  
1156.44 1160.07 1176.65 1178.80 1201.35 1201.83  
1203.37 1207.40 1213.86 1216.60 1217.76 1220.72  
1224.59 1230.15 1237.10 1239.14 1241.42 1259.65  
1268.44 1273.54 1291.75 1298.02 1300.11 1303.23  
1307.99 1308.34 1310.40 1312.66 1320.46 1326.98  
1327.89 1337.73 1343.12 1347.34 1347.57 1350.71  
1364.41 1368.76 1370.10 1370.71 1371.15 1374.98  
1381.33 1382.98 1386.72 1389.95 1391.01 1396.30  
1396.58 1398.34 1399.51 1399.99 1403.45 1404.19  
1405.45 1467.77 1478.60 1486.65 1489.58 1491.60  
1495.42 1498.30 1500.60 1501.39 1502.32 1503.34  
1504.59 1505.44 1506.82 1508.43 1508.90 1509.29  
1510.39 1511.88 1513.87 1517.23 1520.20 1521.46  
1526.00 1527.72 1535.79 1536.95 1575.39 1609.98  
1612.83 1630.77 1644.71 1654.57 1674.49 2056.56  
2988.52 2999.27 3000.40 3005.52 3011.76 3013.47  
3020.19 3021.81 3022.50 3022.61 3023.70 3029.56  
3030.78 3030.82 3042.40 3046.45 3047.25 3057.32  
3058.07 3059.00 3063.32 3067.58 3069.14 3071.44  
3077.25 3079.84 3079.87 3081.40 3084.25 3087.28  
3090.01 3091.26 3102.23 3103.05 3108.05 3114.82

3165.32 3165.83 3180.69 3182.64 3185.79 3189.02  
3191.10 3194.55 3200.41 3203.47 3209.79 3215.07  
3215.37 3220.46 3247.42 3248.16 3613.01 3784.36

=====  
**10**  
=====

20.33 30.05 40.62 50.46 55.66 60.82  
63.35 74.23 83.87 86.74 91.34 104.22  
108.09 118.60 123.30 128.21 139.17 146.66  
162.27 169.56 184.64 191.77 196.33 203.30  
205.78 216.83 219.73 227.55 234.89 246.87  
256.43 260.30 266.10 271.33 280.12 286.73  
311.49 327.99 343.04 356.51 389.35 396.52  
401.94 421.02 429.13 439.01 440.84 447.86  
450.71 455.15 459.19 490.51 493.53 500.27  
517.30 525.60 528.14 545.10 552.06 559.53  
585.93 595.48 610.58 634.31 665.58 679.65  
719.12 722.96 746.62 752.65 801.51 808.16  
811.10 813.36 822.84 828.22 832.71 839.43  
856.51 860.48 866.03 868.78 896.69 897.25  
904.74 905.92 910.92 913.24 921.59 932.74  
938.92 945.45 947.66 985.67 1010.52 1021.87  
1025.65 1028.33 1045.36 1046.99 1048.92 1060.40  
1067.91 1069.36 1074.05 1081.03 1090.27 1093.66  
1096.75 1104.35 1111.45 1118.84 1137.79 1145.29  
1155.32 1174.07 1177.62 1193.06 1202.99 1209.49  
1213.68 1214.80 1220.61 1234.34 1236.99 1247.68  
1261.38 1265.32 1292.38 1293.53 1301.98 1304.68  
1308.62 1310.44 1313.18 1313.87 1320.64 1323.87  
1338.47 1342.96 1349.93 1365.49 1367.69 1370.44  
1375.93 1378.64 1383.90 1387.81 1391.07 1393.83  
1396.04 1398.66 1399.62 1402.78 1403.39 1404.86  
1408.59 1426.81 1434.41 1471.06 1485.19 1494.20  
1497.09 1498.26 1500.37 1500.84 1501.80 1502.48  
1503.89 1504.81 1507.17 1507.81 1509.45 1510.06  
1510.92 1512.19 1517.05 1523.45 1526.18 1529.71  
1543.35 1581.93 1661.98 2034.85 2719.83 2985.62  
3009.83 3021.80 3025.22 3027.05 3027.14 3031.46  
3031.84 3033.27 3033.44 3038.54 3041.81 3042.63  
3045.02 3047.47 3050.67 3052.55 3057.87 3067.74  
3077.31 3085.00 3086.09 3087.34 3089.21 3089.82  
3090.44 3092.19 3095.30 3096.30 3097.51 3104.31  
3115.84 3121.14 3125.83 3129.80 3132.78 3152.85  
3180.83 3186.71 3223.99 3254.25 3802.75 3809.58

=====  
**10-TS**  
=====

-127.70 16.07 30.54 42.02 44.99 49.68  
56.62 63.70 70.60 74.54 79.89 84.83  
93.32 98.28 105.34 113.04 124.59 142.60  
146.73 160.01 170.42 177.18 181.53 189.18  
199.55 207.72 211.14 218.21 221.23 236.27  
255.94 257.40 260.95 267.61 272.89 287.39  
292.33 308.80 326.22 343.70 360.68 375.47  
398.34 401.23 425.33 430.61 436.68 441.62  
446.20 451.47 452.78 461.51 494.41 503.60  
509.53 517.83 522.92 525.97 536.03 541.63  
557.38 572.08 580.73 626.65 671.04 678.74  
722.22 737.44 747.12 756.77 800.76 807.93  
808.21 808.98 810.71 821.66 826.91 830.80  
844.84 866.19 866.42 869.19 891.20 899.62  
902.67 905.38 908.79 910.01 911.76 936.06  
939.58 943.21 955.65 983.79 997.81 1024.68  
1026.44 1028.32 1040.06 1043.98 1050.20 1056.51  
1068.08 1071.22 1074.68 1089.72 1093.43 1096.89  
1099.45 1099.86 1105.24 1112.77 1137.42 1142.84

1158.10 1173.33 1176.01 1189.67 1201.22 1205.24  
1209.49 1211.49 1217.59 1228.81 1233.14 1235.62  
1264.00 1270.52 1292.81 1295.21 1299.56 1299.82  
1302.26 1305.28 1307.91 1309.02 1318.12 1325.65  
1327.83 1335.74 1342.46 1365.34 1367.50 1369.97  
1374.09 1379.73 1380.67 1383.32 1390.07 1394.32  
1394.55 1395.10 1395.96 1397.27 1399.64 1403.66  
1408.38 1421.60 1471.66 1473.60 1483.56 1491.78  
1495.77 1498.04 1499.03 1499.67 1501.33 1502.53  
1503.60 1504.72 1506.65 1507.57 1508.57 1509.73  
1511.26 1511.70 1518.11 1519.95 1524.96 1529.14  
1535.55 1577.99 1666.20 2065.26 2078.70 2955.88  
2996.05 3009.77 3013.49 3015.64 3016.41 3022.84  
3023.27 3028.52 3028.95 3030.34 3032.37 3033.22  
3034.27 3039.32 3042.47 3046.32 3051.44 3066.73  
3069.79 3070.01 3077.18 3079.59 3083.67 3083.91  
3084.77 3086.97 3087.10 3088.50 3089.41 3089.74  
3094.48 3099.85 3112.48 3121.11 3123.97 3125.69  
3181.45 3183.81 3229.79 3247.24 3777.36 3806.90

=====  
**2b**  
=====

20.55 24.35 38.02 50.13 51.58 65.42  
80.17 87.69 125.45 155.90 184.88 189.10  
196.73 210.07 217.58 242.46 266.02 280.20  
284.46 289.18 293.16 361.81 383.99 396.73  
419.76 420.94 422.76 465.66 525.51 533.43  
544.10 552.81 583.97 614.94 627.80 632.82  
637.43 644.31 665.29 704.91 710.68 714.23  
716.76 767.52 770.99 775.34 781.18 819.66  
843.76 858.41 861.03 902.45 924.01 942.37  
952.56 974.76 976.27 977.37 995.97 996.82  
1013.78 1014.59 1019.85 1058.37 1060.06 1092.54  
1115.20 1116.96 1132.84 1170.64 1179.85 1180.37  
1194.31 1194.65 1202.26 1211.24 1218.82 1219.58  
1231.09 1245.20 1251.46 1281.45 1285.53 1329.84  
1350.05 1353.87 1365.74 1366.62 1405.09 1418.38  
1468.02 1485.72 1489.82 1492.74 1505.44 1505.82  
1507.02 1514.51 1521.15 1534.90 1539.93 1553.35  
1625.39 1631.02 1639.77 1653.82 1659.37 1666.45  
1677.56 3008.43 3013.11 3069.71 3078.81 3144.40  
3147.88 3154.17 3168.23 3169.96 3176.96 3178.46  
3186.82 3191.28 3197.79 3201.36 3203.89 3207.30  
3226.13 3245.49 3833.70

=====  
**11**  
=====

10.82 20.91 24.20 32.42 36.41 39.40  
43.43 46.74 47.42 51.94 58.88 63.65  
68.15 73.19 76.14 84.00 84.64 90.07  
96.39 98.65 99.47 103.59 114.16 115.16  
117.38 129.71 135.84 142.22 146.45 155.01  
156.08 162.44 169.27 175.03 175.97 188.75  
189.65 193.29 195.31 198.74 206.72 213.92  
218.66 223.54 227.24 230.17 239.18 244.17  
247.50 257.78 264.44 266.45 268.29 273.77  
275.29 283.31 286.14 287.98 292.93 295.27  
308.70 317.27 325.35 325.70 333.87 346.01  
387.41 391.58 394.82 398.50 406.48 412.60  
418.77 420.24 430.74 431.65 443.81 448.15  
451.64 454.97 458.93 461.00 475.17 494.71  
502.10 508.16 515.69 520.28 527.25 530.53  
532.16 538.23 544.12 553.77 554.45 558.53  
568.69 593.57 598.07 602.31 621.49 622.77  
624.43 630.41 631.60 646.70 650.26 658.98  
663.97 696.03 699.43 710.98 713.79 723.07

|         |         |         |         |         |         |
|---------|---------|---------|---------|---------|---------|
| 728.54  | 738.03  | 741.30  | 746.71  | 774.65  | 778.23  |
| 794.47  | 796.93  | 807.70  | 808.85  | 811.57  | 813.74  |
| 822.29  | 827.32  | 828.66  | 840.74  | 847.96  | 852.30  |
| 866.83  | 867.21  | 867.63  | 869.59  | 875.43  | 899.15  |
| 900.99  | 903.27  | 903.59  | 906.46  | 912.13  | 912.71  |
| 914.54  | 938.53  | 941.06  | 941.65  | 945.74  | 950.68  |
| 954.39  | 959.82  | 983.81  | 986.28  | 992.81  | 997.58  |
| 1005.43 | 1006.16 | 1014.42 | 1015.15 | 1017.01 | 1019.36 |
| 1023.07 | 1025.24 | 1026.32 | 1027.01 | 1040.67 | 1043.10 |
| 1045.58 | 1049.14 | 1059.64 | 1060.09 | 1061.37 | 1066.88 |
| 1074.10 | 1074.94 | 1090.52 | 1090.95 | 1091.91 | 1094.37 |
| 1097.91 | 1100.11 | 1106.26 | 1111.46 | 1116.46 | 1122.28 |
| 1131.12 | 1136.79 | 1141.23 | 1156.73 | 1170.02 | 1175.65 |
| 1177.17 | 1179.70 | 1180.41 | 1192.06 | 1197.73 | 1198.78 |
| 1202.01 | 1203.43 | 1206.09 | 1209.21 | 1211.84 | 1215.71 |
| 1217.54 | 1220.53 | 1221.47 | 1228.16 | 1229.77 | 1234.49 |
| 1235.45 | 1237.21 | 1253.64 | 1260.66 | 1260.71 | 1264.28 |
| 1291.83 | 1298.51 | 1301.48 | 1305.52 | 1306.10 | 1307.65 |
| 1311.25 | 1315.98 | 1319.66 | 1321.24 | 1322.61 | 1335.29 |
| 1338.87 | 1341.31 | 1344.52 | 1350.08 | 1359.74 | 1365.39 |
| 1366.66 | 1367.97 | 1370.10 | 1371.83 | 1375.33 | 1375.63 |
| 1378.66 | 1382.62 | 1384.95 | 1386.61 | 1391.75 | 1392.63 |
| 1394.19 | 1395.80 | 1398.00 | 1400.46 | 1402.44 | 1403.19 |
| 1412.29 | 1415.43 | 1419.68 | 1461.97 | 1473.74 | 1483.11 |
| 1485.25 | 1488.26 | 1489.51 | 1490.93 | 1493.33 | 1497.41 |
| 1499.53 | 1500.51 | 1501.06 | 1501.32 | 1503.19 | 1504.06 |
| 1505.94 | 1506.80 | 1507.00 | 1507.78 | 1508.30 | 1509.51 |
| 1511.07 | 1512.09 | 1512.30 | 1512.38 | 1512.97 | 1517.28 |
| 1521.86 | 1522.91 | 1524.99 | 1526.78 | 1529.63 | 1533.87 |
| 1534.41 | 1535.74 | 1599.90 | 1605.31 | 1624.86 | 1638.03 |
| 1645.85 | 1657.09 | 1659.48 | 1672.33 | 1998.92 | 2959.23 |
| 2995.61 | 3008.64 | 3014.98 | 3017.10 | 3018.11 | 3020.42 |
| 3023.06 | 3029.47 | 3029.82 | 3031.34 | 3032.23 | 3033.59 |
| 3035.54 | 3042.53 | 3048.25 | 3053.19 | 3056.22 | 3059.34 |
| 3063.81 | 3065.29 | 3070.97 | 3073.70 | 3077.77 | 3078.67 |
| 3078.70 | 3080.05 | 3080.09 | 3083.83 | 3084.20 | 3085.26 |
| 3086.76 | 3092.88 | 3102.69 | 3108.16 | 3116.93 | 3117.46 |
| 3119.19 | 3122.46 | 3123.87 | 3136.44 | 3140.99 | 3159.04 |
| 3160.35 | 3161.92 | 3171.66 | 3172.21 | 3175.87 | 3183.14 |
| 3183.24 | 3193.36 | 3196.91 | 3203.43 | 3204.16 | 3209.21 |
| 3210.28 | 3223.70 | 3233.70 | 3242.06 | 3242.76 | 3252.68 |
| 3516.16 | 3769.41 | 3794.37 |         |         |         |

=====

**11-TS**

=====

|         |        |        |        |        |        |
|---------|--------|--------|--------|--------|--------|
| -880.72 | 12.40  | 15.94  | 23.93  | 28.41  | 32.10  |
| 36.62   | 39.10  | 40.72  | 42.57  | 50.49  | 54.32  |
| 56.78   | 61.10  | 64.52  | 68.28  | 77.50  | 80.22  |
| 84.51   | 90.49  | 91.69  | 94.98  | 95.93  | 99.38  |
| 103.51  | 107.41 | 110.51 | 116.48 | 129.44 | 140.52 |
| 152.69  | 155.12 | 166.48 | 172.14 | 174.84 | 175.40 |
| 186.03  | 188.53 | 193.24 | 197.60 | 199.96 | 201.09 |
| 208.39  | 215.36 | 216.34 | 221.96 | 227.64 | 228.30 |
| 236.15  | 245.14 | 249.93 | 262.60 | 263.17 | 266.02 |
| 269.78  | 273.24 | 282.83 | 286.97 | 289.88 | 294.07 |
| 304.44  | 312.09 | 314.07 | 320.52 | 324.88 | 343.55 |
| 367.10  | 381.73 | 396.40 | 398.04 | 400.09 | 407.47 |
| 417.01  | 420.86 | 421.45 | 441.38 | 443.45 | 448.52 |
| 452.83  | 453.15 | 458.49 | 461.29 | 475.81 | 480.02 |
| 507.70  | 508.72 | 515.03 | 519.63 | 527.14 | 530.32 |
| 531.61  | 536.15 | 539.23 | 546.74 | 559.76 | 573.40 |
| 576.77  | 583.09 | 591.44 | 599.88 | 608.26 | 623.13 |
| 626.28  | 633.38 | 638.22 | 646.39 | 650.79 | 652.19 |
| 659.94  | 666.98 | 683.04 | 690.68 | 705.71 | 711.63 |
| 721.54  | 723.65 | 742.71 | 750.36 | 757.34 | 768.19 |
| 773.30  | 793.88 | 795.01 | 809.89 | 812.07 | 815.58 |
| 822.35  | 822.91 | 824.97 | 829.59 | 842.17 | 844.11 |



|         |         |         |         |         |         |
|---------|---------|---------|---------|---------|---------|
| 848.45  | 858.45  | 863.15  | 867.24  | 869.24  | 871.01  |
| 901.19  | 904.12  | 905.73  | 907.24  | 910.02  | 912.62  |
| 917.97  | 930.98  | 936.78  | 936.95  | 942.52  | 945.75  |
| 949.60  | 954.84  | 966.26  | 977.21  | 981.95  | 983.83  |
| 992.27  | 1003.04 | 1003.26 | 1004.95 | 1007.61 | 1015.98 |
| 1024.53 | 1024.94 | 1027.70 | 1028.02 | 1040.71 | 1045.24 |
| 1048.04 | 1049.02 | 1056.62 | 1062.19 | 1063.04 | 1067.25 |
| 1071.63 | 1082.18 | 1089.79 | 1093.28 | 1094.56 | 1094.88 |
| 1100.88 | 1102.58 | 1104.95 | 1111.64 | 1112.61 | 1123.65 |
| 1128.47 | 1138.76 | 1144.69 | 1155.79 | 1158.27 | 1172.43 |
| 1174.88 | 1178.75 | 1179.39 | 1193.84 | 1197.18 | 1199.16 |
| 1199.65 | 1203.25 | 1204.57 | 1210.57 | 1212.17 | 1215.96 |
| 1217.24 | 1218.02 | 1222.11 | 1223.49 | 1228.27 | 1233.60 |
| 1235.65 | 1236.74 | 1242.40 | 1256.27 | 1261.70 | 1263.77 |
| 1267.61 | 1293.19 | 1298.29 | 1300.67 | 1304.70 | 1305.97 |
| 1307.03 | 1309.66 | 1315.62 | 1317.61 | 1318.30 | 1324.03 |
| 1331.00 | 1333.18 | 1339.31 | 1341.77 | 1345.81 | 1346.07 |
| 1355.65 | 1366.18 | 1368.42 | 1368.54 | 1369.58 | 1371.08 |
| 1377.04 | 1379.76 | 1381.10 | 1384.28 | 1387.60 | 1390.33 |
| 1392.68 | 1393.21 | 1394.71 | 1396.42 | 1398.22 | 1401.04 |
| 1402.60 | 1414.43 | 1421.42 | 1429.38 | 1460.74 | 1463.94 |
| 1481.54 | 1488.29 | 1489.73 | 1491.13 | 1492.64 | 1494.24 |
| 1498.21 | 1498.80 | 1499.89 | 1500.34 | 1501.19 | 1501.41 |
| 1502.57 | 1504.77 | 1505.04 | 1505.92 | 1506.33 | 1506.90 |
| 1508.24 | 1510.00 | 1511.26 | 1511.40 | 1511.65 | 1512.82 |
| 1515.15 | 1515.99 | 1519.16 | 1522.98 | 1524.82 | 1529.32 |
| 1529.91 | 1536.58 | 1537.94 | 1586.37 | 1614.28 | 1625.39 |
| 1642.82 | 1647.17 | 1653.97 | 1660.60 | 1674.65 | 2023.94 |
| 2988.87 | 2994.13 | 3008.94 | 3012.71 | 3014.33 | 3017.40 |
| 3018.50 | 3019.85 | 3020.07 | 3020.40 | 3025.40 | 3025.65 |
| 3029.07 | 3030.67 | 3035.19 | 3036.72 | 3047.75 | 3049.27 |
| 3051.70 | 3055.02 | 3058.38 | 3062.52 | 3064.05 | 3070.76 |
| 3077.78 | 3078.37 | 3079.70 | 3080.43 | 3080.92 | 3082.45 |
| 3082.75 | 3085.51 | 3087.43 | 3090.64 | 3100.92 | 3102.32 |
| 3109.19 | 3113.33 | 3113.79 | 3118.27 | 3123.17 | 3138.10 |
| 3154.93 | 3162.30 | 3165.63 | 3180.03 | 3181.49 | 3184.11 |
| 3184.55 | 3191.42 | 3196.61 | 3202.94 | 3204.16 | 3208.74 |
| 3209.25 | 3214.52 | 3235.44 | 3237.93 | 3241.65 | 3244.62 |
| 3593.98 | 3722.06 | 3821.83 |         |         |         |

=====

12

=====

|        |        |        |        |        |        |
|--------|--------|--------|--------|--------|--------|
| 4.83   | 18.29  | 20.87  | 24.08  | 27.87  | 31.59  |
| 38.31  | 44.80  | 48.08  | 50.82  | 53.48  | 56.19  |
| 59.58  | 65.70  | 67.00  | 69.66  | 77.02  | 79.49  |
| 88.10  | 92.30  | 96.06  | 99.06  | 99.96  | 103.74 |
| 107.69 | 110.33 | 117.92 | 129.85 | 132.16 | 138.04 |
| 139.41 | 146.98 | 155.52 | 158.02 | 164.54 | 168.46 |
| 177.72 | 181.68 | 187.86 | 195.48 | 197.77 | 198.49 |
| 204.87 | 210.81 | 212.49 | 218.52 | 223.26 | 225.97 |
| 236.09 | 238.56 | 241.86 | 244.71 | 256.64 | 259.92 |
| 269.62 | 271.76 | 278.11 | 279.10 | 281.45 | 285.13 |
| 293.30 | 303.29 | 307.88 | 311.64 | 326.05 | 344.24 |
| 349.33 | 351.71 | 362.90 | 377.32 | 391.15 | 398.92 |
| 400.91 | 403.98 | 412.17 | 418.69 | 419.51 | 433.75 |
| 440.07 | 442.97 | 446.60 | 449.01 | 452.66 | 459.11 |
| 463.67 | 484.99 | 506.59 | 508.72 | 514.50 | 524.69 |
| 525.88 | 529.86 | 533.59 | 534.42 | 538.92 | 549.52 |
| 553.93 | 570.29 | 579.56 | 582.86 | 590.45 | 606.82 |
| 610.07 | 623.08 | 630.45 | 631.83 | 638.89 | 644.12 |
| 648.04 | 667.84 | 680.83 | 703.37 | 706.13 | 708.58 |
| 716.19 | 716.73 | 719.01 | 726.98 | 734.96 | 752.72 |
| 757.16 | 763.79 | 776.60 | 790.65 | 795.22 | 809.72 |
| 815.19 | 815.48 | 818.63 | 825.08 | 826.46 | 831.48 |
| 841.00 | 842.58 | 846.10 | 860.99 | 868.29 | 869.51 |
| 870.38 | 883.92 | 902.26 | 906.69 | 907.35 | 909.12 |
| 911.37 | 913.22 | 914.23 | 937.16 | 939.09 | 942.73 |

943.17 943.95 950.53 957.19 964.54 967.94  
 976.04 997.06 1005.02 1006.96 1009.01 1014.18  
 1019.60 1026.24 1028.35 1030.30 1039.34 1040.06  
 1044.95 1048.79 1058.01 1059.92 1060.32 1070.68  
 1074.92 1081.46 1083.74 1091.19 1094.72 1095.21  
 1103.34 1106.05 1111.59 1113.34 1114.16 1118.71  
 1123.36 1141.80 1147.87 1160.16 1160.98 1178.49  
 1179.22 1179.89 1184.51 1186.94 1195.47 1198.24  
 1198.47 1200.28 1208.27 1209.43 1213.72 1214.46  
 1220.86 1222.47 1222.64 1222.81 1228.84 1239.82  
 1241.88 1247.38 1248.93 1249.51 1267.38 1268.99  
 1289.22 1293.39 1297.36 1302.19 1304.86 1308.01  
 1311.06 1314.13 1323.37 1331.00 1331.31 1334.33  
 1340.75 1342.33 1344.47 1346.69 1350.38 1365.90  
 1366.08 1367.73 1369.74 1371.28 1372.72 1375.47  
 1379.73 1381.75 1384.61 1392.97 1394.64 1396.02  
 1397.13 1398.40 1400.11 1402.09 1404.61 1410.80  
 1415.19 1452.68 1465.72 1480.15 1481.11 1487.18  
 1492.03 1492.77 1496.55 1496.66 1498.41 1500.10  
 1500.55 1500.84 1501.53 1502.22 1503.18 1503.88  
 1505.79 1507.00 1507.67 1508.71 1509.75 1512.51  
 1515.22 1516.08 1517.61 1519.45 1520.78 1523.91  
 1525.41 1528.31 1531.89 1533.53 1537.73 1545.66  
 1620.76 1622.60 1629.69 1635.09 1649.25 1654.40  
 1655.24 1668.43 1678.14 1699.65 2058.01 3014.20  
 3016.57 3018.25 3019.56 3020.28 3021.48 3022.14  
 3022.95 3023.97 3024.14 3025.10 3026.46 3026.84  
 3027.02 3029.72 3035.95 3039.17 3045.57 3047.87  
 3062.10 3070.77 3074.70 3075.76 3078.34 3078.55  
 3082.17 3082.51 3083.88 3087.62 3088.09 3091.34  
 3096.43 3096.76 3098.26 3099.21 3108.38 3124.08  
 3125.68 3131.87 3154.59 3155.88 3158.09 3160.36  
 3160.42 3160.92 3163.59 3178.28 3184.20 3185.62  
 3194.10 3200.52 3202.01 3207.49 3209.86 3211.34  
 3224.96 3227.66 3241.12 3243.35 3244.68 3617.72  
 3658.75 3770.69 3823.28

=====

**5'-TS**

=====

-28.58 13.52 19.25 21.32 27.95 37.01  
 42.35 46.43 52.91 57.37 59.92 63.69  
 69.71 74.36 78.25 80.52 86.74 89.91  
 91.67 96.39 101.31 104.99 106.57 117.06  
 129.65 143.13 153.47 163.85 173.09 174.39  
 179.73 184.19 201.95 208.85 215.79 219.41  
 222.29 233.47 235.43 241.27 263.61 271.71  
 274.54 278.22 287.96 288.83 291.04 300.68  
 309.66 327.32 331.99 347.68 351.10 355.75  
 381.79 398.76 402.52 417.04 426.39 432.26  
 435.73 440.38 443.30 445.98 451.28 453.11  
 463.50 495.15 505.40 511.75 523.49 525.72  
 529.17 534.61 537.44 541.72 551.10 575.59  
 582.38 583.34 596.66 610.88 631.03 631.53  
 637.37 659.51 680.21 680.84 708.18 713.51  
 722.12 723.61 745.59 758.18 775.93 789.51  
 794.06 809.44 811.39 812.40 821.77 826.62  
 828.45 830.62 843.67 850.62 861.00 865.40  
 866.69 867.96 879.35 885.79 899.55 903.99  
 905.60 909.50 910.48 912.19 935.91 936.89  
 940.95 943.84 953.66 958.79 975.03 987.99  
 996.86 1006.00 1007.43 1015.18 1019.16 1024.44  
 1027.28 1028.40 1037.76 1039.71 1040.67 1044.52  
 1047.84 1053.34 1056.67 1066.90 1069.49 1070.17  
 1088.48 1089.78 1092.58 1094.32 1101.02 1107.38  
 1114.52 1116.21 1118.58 1123.31 1139.83 1145.48  
 1159.22 1177.49 1178.11 1180.87 1198.27 1199.06  
 1200.31 1206.13 1211.12 1216.48 1218.36 1218.93

1227.32 1230.26 1231.17 1237.56 1239.59 1255.17  
 1255.63 1267.98 1292.44 1297.95 1299.86 1303.59  
 1307.06 1307.97 1308.26 1310.80 1320.59 1321.30  
 1329.86 1331.49 1337.77 1341.76 1343.06 1349.37  
 1363.88 1366.42 1366.56 1369.40 1371.47 1373.36  
 1377.40 1379.76 1382.18 1383.62 1391.92 1395.01  
 1395.21 1395.44 1396.03 1396.78 1398.28 1402.23  
 1404.75 1456.25 1478.86 1484.09 1486.74 1489.44  
 1493.37 1497.16 1499.43 1499.75 1501.10 1501.84  
 1502.66 1502.96 1504.58 1507.20 1507.41 1508.26  
 1510.96 1512.86 1513.76 1515.76 1518.58 1521.81  
 1526.51 1527.12 1528.24 1532.48 1603.95 1608.68  
 1613.43 1643.94 1650.30 1656.85 1661.54 2071.04  
 3008.12 3014.66 3016.09 3017.80 3018.19 3021.39  
 3022.46 3023.95 3025.11 3025.37 3027.51 3029.01  
 3030.82 3033.16 3034.70 3040.67 3042.10 3057.17  
 3065.97 3068.63 3076.20 3080.35 3080.74 3081.08  
 3083.91 3084.47 3085.89 3086.22 3086.47 3087.88  
 3090.27 3091.41 3095.70 3096.53 3112.88 3115.29  
 3116.38 3119.53 3120.99 3139.16 3148.18 3150.59  
 3157.38 3160.33 3164.10 3164.99 3169.97 3199.25  
 3201.82 3227.10 3234.41 3238.75 3670.55 3810.78

=====

6'

=====

12.96 20.90 27.16 28.91 29.84 42.98  
 46.51 53.25 57.18 65.40 67.81 68.86  
 76.57 80.85 83.44 86.21 89.51 94.56  
 96.44 105.19 109.06 116.32 123.31 133.92  
 144.19 149.52 157.50 174.97 179.71 180.38  
 186.88 195.08 197.37 208.94 217.13 220.66  
 221.70 228.98 235.11 238.68 261.98 268.67  
 275.75 281.65 288.50 290.41 298.32 310.63  
 312.41 324.85 327.27 342.22 348.33 353.10  
 381.91 400.44 401.69 414.26 416.57 428.88  
 431.55 433.40 443.75 445.31 451.19 452.55  
 459.77 461.76 478.56 504.78 520.94 523.71  
 526.82 529.51 536.10 538.75 549.61 573.35  
 578.21 587.09 600.59 607.46 631.46 632.17  
 633.82 659.63 678.65 679.33 706.53 707.66  
 715.51 721.82 742.03 752.27 770.43 785.64  
 788.91 807.44 809.95 813.85 822.90 826.19  
 829.56 830.56 843.87 845.94 855.64 856.38  
 865.62 867.87 868.87 870.99 902.31 904.76  
 906.87 910.08 910.58 915.94 935.74 937.50  
 942.05 942.67 943.65 959.45 978.39 980.47  
 985.54 1010.77 1013.08 1013.87 1015.21 1024.79  
 1027.87 1028.21 1040.45 1043.25 1045.21 1049.16  
 1054.76 1060.60 1061.44 1071.42 1073.65 1089.18  
 1089.50 1092.98 1094.07 1095.63 1100.05 1108.63  
 1115.18 1118.13 1123.14 1132.20 1139.49 1143.89  
 1160.60 1177.07 1179.61 1180.89 1198.81 1202.22  
 1204.91 1206.89 1212.89 1216.79 1217.73 1220.16  
 1228.74 1231.76 1232.96 1236.76 1239.36 1240.43  
 1255.89 1268.92 1291.68 1299.31 1302.15 1304.80  
 1308.17 1310.34 1310.77 1312.38 1323.09 1330.19  
 1334.84 1341.07 1341.45 1345.76 1351.66 1364.44  
 1365.00 1367.66 1370.00 1372.74 1373.23 1375.49  
 1379.99 1382.00 1382.66 1384.58 1393.68 1394.50  
 1395.49 1397.17 1398.07 1398.70 1402.27 1405.91  
 1416.68 1455.89 1481.11 1484.84 1486.68 1492.78  
 1494.20 1496.67 1499.42 1500.11 1501.24 1501.59  
 1502.02 1503.53 1504.35 1507.07 1507.75 1507.83  
 1511.43 1512.43 1514.15 1517.64 1518.38 1522.10  
 1527.32 1528.30 1529.25 1541.14 1613.59 1619.33  
 1623.24 1642.97 1651.04 1657.60 1659.19 2052.32  
 3013.10 3013.52 3015.09 3019.19 3020.83 3021.76

3022.66 3023.25 3025.25 3026.77 3028.61 3029.14  
 3031.37 3041.32 3047.48 3051.73 3056.40 3059.66  
 3062.99 3070.16 3075.66 3077.45 3077.68 3079.50  
 3081.41 3083.65 3084.13 3084.81 3086.70 3087.48  
 3095.34 3098.62 3105.28 3109.52 3118.94 3121.38  
 3137.93 3156.84 3158.70 3172.99 3182.34 3192.41  
 3195.76 3199.96 3202.11 3206.23 3214.36 3216.20  
 3223.59 3237.86 3245.95 3270.06 3791.21 3813.96

=====

**6'-TS**

=====

-363.48 19.21 19.56 29.28 32.48 42.20  
 46.78 50.41 56.46 58.07 60.58 66.20  
 69.03 75.56 77.33 83.53 86.63 94.97  
 97.90 99.94 102.27 106.89 115.84 126.70  
 137.46 155.88 164.42 169.55 178.47 184.30  
 186.22 192.88 202.62 206.47 210.00 213.85  
 218.44 223.42 230.81 233.36 240.16 261.71  
 270.84 272.50 278.34 285.22 286.21 290.33  
 300.65 312.56 323.45 340.69 344.43 380.78  
 387.26 398.13 400.36 404.82 411.62 420.19  
 425.72 438.56 441.63 447.31 450.79 454.88  
 455.36 462.55 500.67 505.25 506.10 517.13  
 521.21 524.22 534.42 537.67 538.48 556.28  
 561.93 582.00 589.64 619.45 626.84 632.25  
 645.19 657.76 673.10 682.84 704.59 709.56  
 724.15 737.98 745.30 751.67 757.73 786.85  
 800.88 806.50 811.68 813.66 814.98 823.22  
 824.81 831.16 836.41 837.80 843.71 851.93  
 867.83 868.93 869.60 894.14 901.93 903.24  
 905.38 907.82 910.08 914.91 922.67 928.59  
 938.66 941.34 942.78 950.48 961.07 973.87  
 976.99 1000.56 1004.48 1009.57 1012.64 1015.37  
 1022.52 1026.52 1028.39 1033.75 1040.67 1045.83  
 1049.09 1052.54 1060.13 1062.80 1070.10 1074.20  
 1089.46 1090.26 1094.44 1098.19 1101.42 1107.99  
 1113.72 1114.84 1117.31 1123.46 1140.00 1144.68  
 1158.91 1176.42 1177.74 1189.91 1201.66 1202.53  
 1202.95 1206.17 1208.36 1212.80 1215.17 1219.00  
 1222.03 1226.46 1229.47 1233.24 1238.74 1251.86  
 1266.63 1267.56 1285.48 1293.40 1299.15 1302.04  
 1305.15 1308.31 1309.78 1311.17 1318.59 1327.73  
 1328.07 1334.39 1341.39 1345.18 1350.26 1359.67  
 1366.38 1367.09 1368.80 1370.80 1372.66 1375.98  
 1377.23 1380.81 1382.29 1384.97 1391.51 1394.53  
 1395.15 1395.92 1396.71 1397.69 1398.97 1400.79  
 1403.77 1463.49 1472.57 1477.68 1488.80 1492.46  
 1496.81 1498.17 1499.67 1500.29 1500.97 1501.15  
 1502.13 1503.72 1504.17 1507.35 1508.09 1508.58  
 1509.60 1510.10 1510.38 1511.83 1514.89 1520.04  
 1520.75 1522.46 1527.07 1528.36 1544.76 1593.92  
 1597.19 1638.23 1645.38 1648.12 1658.73 2037.44  
 2979.33 3014.91 3017.43 3018.73 3022.30 3022.78  
 3025.08 3026.87 3027.56 3029.25 3029.78 3030.62  
 3031.28 3033.05 3035.74 3037.25 3046.54 3056.35  
 3059.14 3061.91 3067.35 3074.11 3076.90 3078.44  
 3081.27 3083.57 3083.61 3084.21 3085.75 3087.59  
 3089.13 3095.33 3102.83 3103.65 3107.44 3113.77  
 3151.50 3155.37 3161.93 3169.71 3170.81 3183.81  
 3189.18 3189.47 3197.72 3198.55 3210.71 3211.29  
 3212.73 3219.76 3246.67 3264.33 3813.09 3838.94

=====

**7'**

=====

24.44 28.22 32.33 37.27 42.64 49.52  
 53.65 60.92 61.47 69.78 72.37 75.65

|         |         |         |         |         |         |
|---------|---------|---------|---------|---------|---------|
| 81.78   | 84.82   | 88.51   | 91.33   | 95.46   | 99.95   |
| 107.52  | 112.40  | 118.42  | 121.05  | 131.04  | 142.89  |
| 157.71  | 161.15  | 175.97  | 182.69  | 185.68  | 193.94  |
| 198.82  | 207.08  | 211.40  | 214.36  | 220.21  | 223.05  |
| 233.98  | 235.91  | 256.28  | 260.38  | 268.58  | 273.47  |
| 275.59  | 284.42  | 287.73  | 288.80  | 294.22  | 313.81  |
| 327.02  | 335.26  | 340.19  | 343.00  | 352.95  | 377.55  |
| 387.72  | 398.45  | 401.93  | 404.45  | 413.62  | 422.70  |
| 424.01  | 441.83  | 447.73  | 450.20  | 456.88  | 459.43  |
| 463.70  | 474.47  | 489.53  | 504.20  | 508.23  | 520.98  |
| 524.22  | 534.70  | 535.43  | 537.05  | 558.39  | 565.85  |
| 583.48  | 594.54  | 602.27  | 620.97  | 627.86  | 632.89  |
| 655.27  | 662.80  | 694.31  | 708.57  | 716.42  | 719.21  |
| 726.74  | 744.15  | 752.61  | 758.93  | 770.11  | 798.19  |
| 802.27  | 805.51  | 810.37  | 812.97  | 823.36  | 823.67  |
| 825.01  | 831.94  | 838.53  | 840.48  | 858.43  | 865.61  |
| 866.74  | 867.94  | 869.83  | 892.14  | 900.10  | 901.25  |
| 905.26  | 907.69  | 910.23  | 913.58  | 926.85  | 937.79  |
| 940.18  | 941.09  | 942.59  | 960.47  | 973.92  | 984.99  |
| 992.74  | 1005.76 | 1007.75 | 1015.88 | 1018.41 | 1022.12 |
| 1022.41 | 1025.43 | 1027.95 | 1037.95 | 1041.21 | 1046.68 |
| 1048.36 | 1057.09 | 1061.14 | 1064.98 | 1067.13 | 1072.55 |
| 1092.12 | 1094.54 | 1095.40 | 1098.28 | 1102.48 | 1106.56 |
| 1112.18 | 1116.36 | 1122.67 | 1125.95 | 1138.26 | 1144.79 |
| 1157.16 | 1163.27 | 1177.55 | 1177.89 | 1199.97 | 1201.88 |
| 1203.26 | 1205.31 | 1209.13 | 1212.08 | 1212.94 | 1214.55 |
| 1218.44 | 1221.11 | 1227.47 | 1232.69 | 1236.33 | 1248.15 |
| 1252.58 | 1265.01 | 1281.85 | 1293.46 | 1297.15 | 1300.84 |
| 1304.11 | 1308.00 | 1308.87 | 1310.50 | 1318.44 | 1325.30 |
| 1333.92 | 1337.98 | 1342.80 | 1344.58 | 1348.96 | 1352.61 |
| 1365.38 | 1367.52 | 1368.11 | 1370.07 | 1376.31 | 1378.83 |
| 1382.23 | 1384.47 | 1385.21 | 1391.24 | 1394.89 | 1395.54 |
| 1396.31 | 1397.97 | 1399.04 | 1400.22 | 1401.68 | 1404.00 |
| 1408.52 | 1451.19 | 1471.54 | 1473.06 | 1483.59 | 1491.54 |
| 1491.81 | 1497.08 | 1497.90 | 1499.73 | 1500.46 | 1501.31 |
| 1501.66 | 1503.01 | 1503.87 | 1504.07 | 1507.61 | 1507.97 |
| 1508.86 | 1509.08 | 1510.23 | 1511.99 | 1516.32 | 1517.88 |
| 1520.90 | 1521.60 | 1525.37 | 1528.79 | 1540.90 | 1574.46 |
| 1604.34 | 1644.62 | 1653.91 | 1658.04 | 1661.66 | 2028.38 |
| 2981.37 | 3016.26 | 3019.00 | 3019.75 | 3023.33 | 3025.30 |
| 3025.73 | 3027.45 | 3028.64 | 3029.72 | 3031.76 | 3032.96 |
| 3038.89 | 3043.73 | 3044.54 | 3051.13 | 3056.55 | 3059.36 |
| 3063.25 | 3067.16 | 3073.80 | 3076.30 | 3079.06 | 3080.61 |
| 3083.34 | 3085.65 | 3086.27 | 3089.07 | 3090.47 | 3093.46 |
| 3102.73 | 3104.56 | 3111.08 | 3115.13 | 3121.93 | 3122.30 |
| 3128.11 | 3143.35 | 3154.41 | 3172.03 | 3177.73 | 3178.19 |
| 3180.98 | 3191.18 | 3192.98 | 3198.97 | 3203.49 | 3210.09 |
| 3217.59 | 3218.79 | 3255.56 | 3263.86 | 3744.46 | 3823.21 |

=====

**7'-TS**

=====

|        |        |        |        |        |        |
|--------|--------|--------|--------|--------|--------|
| -27.97 | 14.57  | 16.09  | 26.72  | 32.37  | 37.91  |
| 42.18  | 51.11  | 53.94  | 57.93  | 67.76  | 69.39  |
| 73.95  | 75.38  | 80.66  | 85.77  | 87.41  | 90.78  |
| 95.36  | 101.11 | 103.79 | 113.12 | 119.24 | 136.99 |
| 142.75 | 145.65 | 150.53 | 159.51 | 174.48 | 180.55 |
| 185.99 | 198.18 | 209.89 | 212.02 | 212.91 | 219.58 |
| 234.09 | 244.54 | 252.68 | 254.15 | 264.99 | 275.22 |
| 279.21 | 282.56 | 291.73 | 302.37 | 308.86 | 312.25 |
| 315.64 | 333.41 | 335.55 | 342.16 | 396.02 | 397.61 |
| 399.55 | 406.22 | 408.36 | 420.02 | 420.87 | 425.83 |
| 436.70 | 446.05 | 448.48 | 449.78 | 460.71 | 471.95 |
| 485.06 | 495.37 | 505.34 | 505.82 | 519.95 | 525.76 |
| 533.12 | 541.62 | 543.25 | 558.57 | 562.00 | 571.02 |
| 591.10 | 603.72 | 617.48 | 630.55 | 633.53 | 641.32 |
| 647.39 | 678.76 | 707.60 | 714.01 | 721.63 | 726.59 |
| 741.77 | 746.94 | 749.78 | 755.98 | 759.72 | 776.49 |

|         |         |         |         |         |         |
|---------|---------|---------|---------|---------|---------|
| 805.60  | 807.52  | 807.80  | 810.58  | 812.60  | 819.03  |
| 823.53  | 831.14  | 831.58  | 844.35  | 847.02  | 858.27  |
| 865.40  | 866.35  | 869.14  | 899.83  | 900.65  | 903.41  |
| 904.49  | 908.68  | 909.27  | 911.78  | 913.69  | 936.81  |
| 938.00  | 940.43  | 941.34  | 954.65  | 974.62  | 979.69  |
| 991.70  | 1002.48 | 1004.80 | 1009.87 | 1014.14 | 1019.74 |
| 1020.29 | 1025.10 | 1027.31 | 1029.31 | 1040.33 | 1044.04 |
| 1049.11 | 1055.22 | 1056.74 | 1065.60 | 1068.19 | 1071.08 |
| 1082.55 | 1090.52 | 1093.69 | 1093.92 | 1096.74 | 1100.73 |
| 1105.63 | 1110.90 | 1111.04 | 1131.15 | 1135.11 | 1138.93 |
| 1158.40 | 1171.57 | 1176.99 | 1179.97 | 1192.65 | 1198.26 |
| 1200.92 | 1206.08 | 1207.71 | 1209.88 | 1212.00 | 1217.57 |
| 1220.46 | 1221.37 | 1225.58 | 1225.80 | 1232.87 | 1236.15 |
| 1262.27 | 1265.44 | 1281.85 | 1292.58 | 1297.45 | 1300.40 |
| 1302.58 | 1305.11 | 1308.27 | 1310.41 | 1313.93 | 1326.73 |
| 1332.58 | 1337.45 | 1342.89 | 1343.01 | 1348.89 | 1354.02 |
| 1363.99 | 1364.87 | 1367.47 | 1368.56 | 1373.25 | 1375.57 |
| 1379.63 | 1384.06 | 1384.53 | 1388.26 | 1394.06 | 1394.36 |
| 1394.91 | 1395.43 | 1396.14 | 1397.77 | 1399.73 | 1401.74 |
| 1417.63 | 1459.43 | 1471.62 | 1473.34 | 1482.48 | 1488.59 |
| 1492.15 | 1495.77 | 1497.10 | 1497.29 | 1497.97 | 1500.68 |
| 1501.01 | 1502.43 | 1503.60 | 1505.39 | 1505.63 | 1506.60 |
| 1508.07 | 1508.66 | 1510.77 | 1513.20 | 1516.18 | 1518.77 |
| 1520.91 | 1521.20 | 1524.70 | 1537.72 | 1547.19 | 1565.39 |
| 1629.39 | 1640.42 | 1658.31 | 1660.09 | 1675.47 | 2052.44 |
| 2927.10 | 2978.72 | 3017.65 | 3020.28 | 3021.35 | 3022.59 |
| 3024.08 | 3025.09 | 3025.63 | 3026.07 | 3029.30 | 3029.90 |
| 3030.36 | 3035.27 | 3039.56 | 3048.51 | 3051.00 | 3052.73 |
| 3057.24 | 3063.80 | 3069.22 | 3079.45 | 3079.84 | 3081.33 |
| 3081.52 | 3082.55 | 3084.86 | 3085.63 | 3088.13 | 3089.19 |
| 3089.26 | 3092.30 | 3095.54 | 3102.07 | 3104.59 | 3112.95 |
| 3117.49 | 3140.25 | 3142.46 | 3164.72 | 3168.42 | 3187.94 |
| 3193.65 | 3193.67 | 3202.47 | 3209.78 | 3214.41 | 3215.60 |
| 3218.69 | 3229.22 | 3232.01 | 3248.08 | 3473.82 | 3836.53 |

=====

8'

=====

|         |         |         |         |         |         |
|---------|---------|---------|---------|---------|---------|
| 16.59   | 22.81   | 27.21   | 28.27   | 35.11   | 47.33   |
| 48.28   | 54.17   | 56.83   | 61.06   | 69.90   | 73.37   |
| 78.02   | 85.38   | 89.71   | 89.99   | 97.44   | 102.47  |
| 113.12  | 121.75  | 127.81  | 135.77  | 147.15  | 149.35  |
| 152.24  | 173.93  | 179.66  | 185.16  | 186.25  | 192.01  |
| 198.27  | 209.12  | 214.51  | 219.42  | 225.17  | 231.80  |
| 241.45  | 250.84  | 254.68  | 262.57  | 265.33  | 273.17  |
| 274.80  | 277.42  | 287.17  | 300.21  | 311.89  | 315.78  |
| 323.01  | 329.89  | 346.92  | 378.84  | 398.45  | 399.22  |
| 411.68  | 415.01  | 423.31  | 426.30  | 432.13  | 437.59  |
| 441.72  | 446.63  | 449.58  | 452.42  | 458.10  | 474.39  |
| 495.49  | 499.66  | 511.91  | 521.67  | 522.78  | 529.31  |
| 530.70  | 542.09  | 547.45  | 560.60  | 576.32  | 586.69  |
| 606.13  | 607.74  | 615.95  | 625.31  | 633.01  | 639.00  |
| 641.30  | 665.73  | 702.33  | 713.10  | 716.40  | 721.07  |
| 727.84  | 731.67  | 743.69  | 746.64  | 771.04  | 775.15  |
| 789.70  | 802.97  | 811.67  | 813.52  | 823.90  | 827.03  |
| 833.54  | 837.27  | 844.42  | 861.20  | 863.57  | 865.53  |
| 866.54  | 868.68  | 898.68  | 900.64  | 903.13  | 907.08  |
| 911.71  | 913.37  | 914.67  | 927.12  | 938.20  | 938.75  |
| 941.06  | 942.82  | 950.66  | 961.77  | 976.35  | 982.85  |
| 984.97  | 1004.13 | 1005.75 | 1008.38 | 1014.47 | 1017.83 |
| 1023.32 | 1026.83 | 1029.85 | 1041.85 | 1045.81 | 1049.13 |
| 1058.77 | 1060.26 | 1062.53 | 1064.35 | 1070.93 | 1074.54 |
| 1087.83 | 1092.36 | 1095.07 | 1096.27 | 1103.20 | 1107.71 |
| 1111.88 | 1116.89 | 1121.72 | 1126.92 | 1139.59 | 1141.96 |
| 1159.21 | 1168.86 | 1174.92 | 1178.62 | 1199.11 | 1200.17 |
| 1206.07 | 1206.27 | 1209.56 | 1212.29 | 1215.62 | 1219.19 |
| 1220.06 | 1222.75 | 1224.14 | 1234.88 | 1237.89 | 1247.88 |
| 1255.41 | 1257.95 | 1263.65 | 1292.58 | 1294.58 | 1296.60 |

|         |         |         |         |         |         |
|---------|---------|---------|---------|---------|---------|
| 1301.56 | 1304.78 | 1307.21 | 1307.62 | 1312.04 | 1320.92 |
| 1324.67 | 1329.36 | 1331.94 | 1340.68 | 1346.81 | 1348.94 |
| 1357.36 | 1367.00 | 1367.65 | 1368.12 | 1369.65 | 1371.22 |
| 1374.48 | 1379.98 | 1381.35 | 1385.04 | 1387.03 | 1390.42 |
| 1395.19 | 1396.04 | 1397.29 | 1397.90 | 1400.48 | 1403.03 |
| 1404.65 | 1418.56 | 1466.81 | 1487.30 | 1489.54 | 1492.50 |
| 1497.01 | 1498.41 | 1499.16 | 1500.09 | 1500.97 | 1501.99 |
| 1503.03 | 1504.71 | 1507.08 | 1507.72 | 1508.70 | 1509.37 |
| 1510.75 | 1510.92 | 1511.16 | 1513.54 | 1518.58 | 1520.62 |
| 1523.70 | 1525.09 | 1536.43 | 1539.69 | 1548.03 | 1615.28 |
| 1631.01 | 1642.97 | 1655.07 | 1662.98 | 1676.42 | 2050.75 |
| 2995.53 | 3018.03 | 3019.43 | 3020.39 | 3020.68 | 3020.76 |
| 3021.45 | 3023.07 | 3026.82 | 3028.43 | 3030.79 | 3030.88 |
| 3031.82 | 3035.53 | 3039.77 | 3042.34 | 3048.75 | 3057.63 |
| 3059.62 | 3069.22 | 3073.33 | 3076.83 | 3080.49 | 3081.98 |
| 3084.26 | 3086.18 | 3087.29 | 3087.55 | 3088.76 | 3088.89 |
| 3089.83 | 3089.85 | 3094.37 | 3103.70 | 3115.83 | 3119.42 |
| 3124.38 | 3125.51 | 3164.12 | 3165.81 | 3166.32 | 3181.16 |
| 3186.17 | 3188.68 | 3195.24 | 3198.15 | 3208.07 | 3208.30 |
| 3212.51 | 3222.19 | 3227.08 | 3253.18 | 3784.89 | 3813.15 |

=====

**8'-TS**

=====

|         |         |         |         |         |         |
|---------|---------|---------|---------|---------|---------|
| -234.71 | 17.62   | 21.03   | 25.27   | 31.86   | 35.14   |
| 43.96   | 47.99   | 55.26   | 57.56   | 61.92   | 70.46   |
| 74.57   | 77.30   | 85.34   | 88.19   | 89.32   | 97.38   |
| 101.68  | 114.76  | 120.68  | 127.13  | 137.11  | 143.25  |
| 149.84  | 151.28  | 177.01  | 180.29  | 184.08  | 190.37  |
| 191.80  | 203.45  | 207.73  | 213.01  | 215.86  | 219.42  |
| 227.32  | 242.21  | 250.54  | 255.14  | 258.10  | 261.45  |
| 266.67  | 271.18  | 276.62  | 281.24  | 286.88  | 312.97  |
| 313.22  | 328.36  | 338.74  | 346.82  | 367.94  | 399.20  |
| 399.72  | 406.45  | 416.70  | 420.76  | 427.46  | 435.56  |
| 438.84  | 446.87  | 449.62  | 450.62  | 455.20  | 458.20  |
| 480.16  | 499.70  | 510.79  | 514.32  | 521.13  | 523.59  |
| 528.45  | 531.40  | 534.37  | 556.09  | 569.97  | 575.28  |
| 597.67  | 601.57  | 613.58  | 627.16  | 632.80  | 644.91  |
| 647.10  | 660.52  | 696.20  | 707.03  | 711.91  | 717.45  |
| 723.30  | 735.02  | 742.82  | 746.19  | 747.21  | 775.23  |
| 787.52  | 791.59  | 796.96  | 803.34  | 811.48  | 812.82  |
| 824.08  | 828.12  | 833.49  | 843.74  | 846.41  | 862.82  |
| 864.13  | 866.36  | 868.44  | 869.45  | 901.06  | 903.28  |
| 906.87  | 911.30  | 913.32  | 913.88  | 930.11  | 938.18  |
| 940.28  | 940.95  | 942.82  | 953.67  | 962.71  | 980.61  |
| 984.51  | 999.38  | 1001.61 | 1008.64 | 1009.99 | 1016.15 |
| 1017.97 | 1023.59 | 1027.29 | 1029.73 | 1041.68 | 1045.50 |
| 1049.17 | 1053.45 | 1060.52 | 1061.42 | 1070.31 | 1074.32 |
| 1077.24 | 1092.65 | 1092.84 | 1095.53 | 1096.65 | 1102.74 |
| 1106.83 | 1116.38 | 1117.17 | 1119.40 | 1125.50 | 1139.32 |
| 1141.84 | 1158.98 | 1174.77 | 1177.38 | 1199.10 | 1199.75 |
| 1202.83 | 1205.53 | 1209.28 | 1214.40 | 1218.18 | 1219.28 |
| 1219.80 | 1221.50 | 1223.35 | 1234.74 | 1237.43 | 1243.64 |
| 1262.34 | 1263.33 | 1269.42 | 1294.21 | 1296.17 | 1300.12 |
| 1302.29 | 1304.45 | 1307.00 | 1307.52 | 1312.04 | 1320.95 |
| 1324.12 | 1329.96 | 1331.09 | 1340.74 | 1347.28 | 1349.19 |
| 1363.02 | 1365.39 | 1367.60 | 1368.41 | 1369.92 | 1371.41 |
| 1374.52 | 1380.06 | 1382.01 | 1385.49 | 1387.37 | 1390.37 |
| 1394.90 | 1395.47 | 1396.81 | 1397.55 | 1400.41 | 1402.84 |
| 1404.66 | 1431.97 | 1470.09 | 1481.79 | 1486.61 | 1492.91 |
| 1496.97 | 1498.83 | 1499.97 | 1500.87 | 1500.93 | 1501.95 |
| 1503.10 | 1504.78 | 1507.10 | 1507.63 | 1508.66 | 1510.03 |
| 1510.36 | 1511.21 | 1511.23 | 1512.64 | 1520.78 | 1522.44 |
| 1524.75 | 1526.02 | 1532.93 | 1537.00 | 1541.85 | 1599.17 |
| 1633.19 | 1634.46 | 1655.92 | 1657.61 | 1671.25 | 2053.76 |
| 2993.70 | 3016.25 | 3018.75 | 3019.71 | 3021.19 | 3021.54 |
| 3022.45 | 3027.09 | 3027.76 | 3028.65 | 3031.20 | 3032.31 |
| 3034.87 | 3035.93 | 3040.49 | 3042.73 | 3048.31 | 3056.61 |

3061.88 3069.96 3072.27 3074.84 3080.69 3081.04  
3082.95 3085.17 3086.11 3087.67 3088.61 3089.72  
3093.73 3095.93 3098.90 3110.31 3112.78 3116.16  
3119.83 3124.53 3166.79 3170.53 3172.35 3185.61  
3187.15 3194.00 3196.26 3203.28 3208.88 3212.92  
3215.12 3229.56 3250.77 3255.29 3792.98 3802.79

9'

17.03 25.21 29.67 32.33 39.34 44.43  
50.77 52.11 56.96 65.14 69.27 73.67  
77.30 88.15 90.71 93.06 99.81 104.73  
108.71 110.15 121.94 130.72 135.87 138.02  
155.83 158.42 167.80 177.54 184.23 190.55  
193.94 200.85 209.20 211.39 216.17 218.61  
220.15 222.05 240.09 248.09 250.42 260.65  
268.19 273.74 282.20 284.45 288.37 308.96  
312.80 322.61 327.56 346.48 349.13 392.99  
398.28 403.41 417.52 423.20 424.19 425.71  
433.25 439.82 446.30 449.28 452.31 459.16  
478.18 488.61 505.76 512.52 518.58 521.52  
528.48 531.44 538.85 544.11 552.54 559.03  
561.08 588.40 598.93 608.89 622.08 629.98  
637.66 644.84 654.51 706.18 708.41 717.06  
723.62 741.69 744.13 744.31 747.72 773.98  
785.68 791.91 803.89 811.27 814.10 825.93  
828.11 832.47 837.04 845.71 860.17 864.71  
867.17 868.18 878.92 901.39 903.36 910.43  
912.58 913.65 921.17 927.44 934.60 938.70  
942.32 946.49 961.39 965.07 967.68 983.26  
989.19 992.98 995.81 1008.63 1015.09 1018.35  
1020.52 1023.46 1028.02 1030.64 1041.99 1047.05  
1048.50 1055.93 1059.07 1060.90 1070.15 1075.34  
1089.01 1090.39 1095.65 1096.50 1103.10 1108.83  
1110.43 1113.84 1116.66 1117.58 1141.06 1142.66  
1161.57 1162.94 1177.16 1179.15 1199.23 1203.30  
1204.48 1207.71 1212.70 1216.31 1219.09 1220.73  
1222.79 1228.76 1234.79 1236.76 1246.93 1257.74  
1265.42 1267.20 1291.51 1297.98 1300.16 1303.25  
1305.40 1308.16 1309.66 1311.91 1321.14 1326.82  
1332.09 1337.36 1341.66 1347.24 1347.95 1356.66  
1362.99 1368.40 1369.12 1371.17 1373.00 1374.39  
1376.80 1381.07 1383.47 1384.82 1388.84 1393.30  
1396.85 1398.15 1400.02 1401.48 1402.15 1403.59  
1434.74 1470.28 1480.23 1487.97 1488.81 1489.36  
1496.41 1499.11 1500.03 1500.37 1501.70 1503.05  
1505.29 1506.71 1507.06 1508.79 1509.57 1510.50  
1511.47 1513.60 1514.79 1519.68 1520.87 1524.71  
1525.66 1538.08 1539.40 1548.94 1583.47 1610.97  
1617.84 1633.15 1648.51 1657.67 1676.34 2066.41  
3014.78 3016.92 3018.23 3019.93 3021.06 3023.03  
3024.43 3027.21 3029.07 3030.41 3031.07 3032.46  
3035.16 3041.41 3042.21 3048.80 3057.06 3062.47  
3065.77 3074.23 3077.27 3081.43 3082.46 3085.31  
3085.50 3086.14 3086.81 3088.81 3089.12 3089.27  
3096.14 3098.60 3100.59 3106.09 3108.18 3111.87  
3115.80 3161.43 3163.38 3171.11 3180.70 3182.66  
3186.77 3192.92 3196.60 3199.97 3205.71 3210.45  
3212.61 3220.23 3249.75 3257.77 3768.46 3828.15

2b'

16.32 31.15 31.83 43.90 45.72 70.45  
81.63 89.57 127.26 139.54 160.18 184.81  
198.47 212.07 223.68 229.13 261.56 273.66  
290.53 299.29 312.85 347.07 384.32 394.53



|         |         |         |         |         |         |
|---------|---------|---------|---------|---------|---------|
| 414.19  | 419.69  | 432.82  | 476.62  | 502.79  | 538.47  |
| 544.92  | 555.64  | 580.76  | 615.97  | 626.06  | 632.51  |
| 638.24  | 645.03  | 647.41  | 707.12  | 711.02  | 715.51  |
| 736.39  | 748.75  | 774.64  | 775.22  | 793.60  | 816.71  |
| 839.77  | 860.01  | 861.90  | 902.49  | 923.16  | 934.22  |
| 955.18  | 970.95  | 976.03  | 976.42  | 995.53  | 997.89  |
| 1014.43 | 1015.01 | 1016.78 | 1057.27 | 1059.47 | 1093.64 |
| 1112.51 | 1116.62 | 1131.08 | 1172.47 | 1180.59 | 1180.89 |
| 1194.09 | 1195.25 | 1199.25 | 1209.95 | 1216.73 | 1219.59 |
| 1230.57 | 1240.77 | 1245.99 | 1268.25 | 1297.62 | 1332.78 |
| 1343.00 | 1353.62 | 1364.13 | 1366.97 | 1399.84 | 1407.71 |
| 1467.44 | 1484.88 | 1488.79 | 1492.89 | 1504.54 | 1505.81 |
| 1506.28 | 1516.98 | 1521.62 | 1536.02 | 1539.35 | 1555.88 |
| 1629.52 | 1631.08 | 1642.89 | 1658.08 | 1660.00 | 1668.60 |
| 1695.93 | 3002.70 | 3009.81 | 3063.13 | 3073.11 | 3142.32 |
| 3142.79 | 3148.14 | 3168.14 | 3169.56 | 3176.84 | 3179.33 |
| 3187.28 | 3193.34 | 3200.43 | 3201.60 | 3201.70 | 3208.91 |
| 3225.06 | 3241.16 | 3822.52 |         |         |         |

=====  
**11'**  
=====

|         |         |         |         |         |         |
|---------|---------|---------|---------|---------|---------|
| 4.57    | 17.64   | 23.28   | 25.41   | 34.20   | 35.33   |
| 40.03   | 43.70   | 47.45   | 51.05   | 57.58   | 62.40   |
| 65.35   | 70.78   | 74.78   | 75.60   | 78.94   | 81.89   |
| 87.33   | 89.29   | 94.93   | 97.84   | 99.36   | 102.51  |
| 111.65  | 116.52  | 119.89  | 124.30  | 127.93  | 132.43  |
| 142.62  | 151.32  | 156.96  | 164.70  | 169.81  | 171.13  |
| 179.55  | 184.56  | 186.45  | 191.83  | 199.08  | 200.59  |
| 207.61  | 210.29  | 217.83  | 218.99  | 223.72  | 229.54  |
| 234.70  | 238.32  | 264.70  | 267.11  | 269.00  | 271.69  |
| 274.51  | 278.40  | 287.31  | 287.85  | 289.62  | 294.09  |
| 297.17  | 302.76  | 311.16  | 323.25  | 327.88  | 343.51  |
| 346.45  | 367.13  | 375.52  | 392.69  | 399.61  | 403.87  |
| 406.60  | 415.36  | 416.42  | 418.37  | 427.98  | 434.04  |
| 438.90  | 447.09  | 451.91  | 460.07  | 460.32  | 462.09  |
| 477.61  | 504.47  | 507.19  | 511.20  | 513.82  | 525.23  |
| 529.75  | 536.14  | 541.21  | 543.81  | 549.14  | 553.17  |
| 556.44  | 565.67  | 568.62  | 578.62  | 596.10  | 607.37  |
| 617.75  | 620.13  | 625.80  | 628.64  | 633.37  | 646.12  |
| 657.48  | 661.19  | 684.70  | 691.32  | 704.31  | 712.68  |
| 721.78  | 732.75  | 747.04  | 752.99  | 760.40  | 771.14  |
| 792.30  | 803.52  | 808.65  | 810.51  | 814.30  | 818.60  |
| 819.65  | 820.81  | 823.72  | 827.13  | 830.10  | 849.85  |
| 852.70  | 855.27  | 858.26  | 866.98  | 869.12  | 870.35  |
| 881.08  | 901.16  | 902.45  | 903.42  | 904.66  | 908.59  |
| 910.91  | 913.92  | 931.30  | 938.39  | 941.17  | 942.38  |
| 946.25  | 951.42  | 954.57  | 971.18  | 981.32  | 983.48  |
| 995.81  | 1000.51 | 1005.65 | 1007.57 | 1012.39 | 1012.72 |
| 1015.39 | 1022.94 | 1026.64 | 1027.63 | 1031.72 | 1038.82 |
| 1043.95 | 1048.00 | 1056.56 | 1057.99 | 1071.29 | 1073.78 |
| 1076.16 | 1080.68 | 1083.98 | 1089.55 | 1093.69 | 1094.85 |
| 1097.89 | 1101.48 | 1104.74 | 1107.21 | 1115.15 | 1116.05 |
| 1137.31 | 1141.79 | 1146.43 | 1155.20 | 1159.40 | 1167.15 |
| 1176.12 | 1179.22 | 1184.65 | 1187.03 | 1190.25 | 1196.56 |
| 1197.04 | 1200.26 | 1203.39 | 1205.68 | 1206.98 | 1212.70 |
| 1214.93 | 1216.73 | 1218.35 | 1219.75 | 1222.43 | 1231.30 |
| 1234.88 | 1235.86 | 1241.10 | 1256.39 | 1262.75 | 1264.51 |
| 1281.64 | 1285.66 | 1292.87 | 1299.44 | 1301.84 | 1305.43 |
| 1305.96 | 1306.91 | 1309.08 | 1319.76 | 1327.37 | 1333.35 |
| 1341.46 | 1342.96 | 1344.33 | 1346.55 | 1349.62 | 1351.37 |
| 1366.44 | 1366.70 | 1369.33 | 1370.76 | 1375.21 | 1382.20 |
| 1383.13 | 1384.59 | 1390.63 | 1391.75 | 1393.02 | 1394.48 |
| 1395.42 | 1396.36 | 1397.71 | 1397.97 | 1401.33 | 1404.01 |
| 1407.46 | 1419.95 | 1445.37 | 1468.19 | 1473.94 | 1478.19 |
| 1487.22 | 1489.93 | 1491.31 | 1492.70 | 1494.02 | 1497.45 |
| 1498.05 | 1499.12 | 1500.42 | 1500.99 | 1501.74 | 1502.04 |
| 1504.30 | 1505.21 | 1506.74 | 1507.42 | 1508.34 | 1508.91 |

|         |         |         |         |         |         |
|---------|---------|---------|---------|---------|---------|
| 1510.35 | 1510.77 | 1512.45 | 1513.11 | 1513.71 | 1517.90 |
| 1519.70 | 1520.88 | 1521.84 | 1524.89 | 1528.23 | 1530.39 |
| 1537.12 | 1541.83 | 1574.18 | 1630.76 | 1642.37 | 1644.05 |
| 1659.31 | 1664.29 | 1665.92 | 1674.45 | 2046.39 | 2978.81 |
| 2989.05 | 3012.31 | 3016.33 | 3019.74 | 3022.60 | 3023.62 |
| 3024.12 | 3025.71 | 3028.30 | 3028.63 | 3029.10 | 3030.23 |
| 3030.97 | 3032.27 | 3036.42 | 3039.19 | 3041.73 | 3046.53 |
| 3048.61 | 3050.44 | 3061.34 | 3073.92 | 3077.43 | 3077.57 |
| 3079.02 | 3080.88 | 3082.33 | 3084.56 | 3085.03 | 3086.32 |
| 3088.88 | 3090.40 | 3090.82 | 3095.13 | 3097.76 | 3098.73 |
| 3107.01 | 3110.56 | 3129.18 | 3149.38 | 3157.11 | 3157.99 |
| 3161.72 | 3165.62 | 3177.35 | 3179.91 | 3184.56 | 3189.09 |
| 3195.28 | 3198.08 | 3201.53 | 3208.42 | 3210.36 | 3212.18 |
| 3229.59 | 3239.17 | 3239.99 | 3240.72 | 3268.61 | 3284.96 |
| 3672.10 | 3803.54 | 3817.11 |         |         |         |

=====

**11'-TS**

=====

|          |         |         |         |         |         |
|----------|---------|---------|---------|---------|---------|
| -1380.60 | 11.09   | 15.92   | 19.09   | 28.89   | 32.30   |
| 35.75    | 45.33   | 51.74   | 55.15   | 58.34   | 59.86   |
| 66.84    | 68.52   | 72.99   | 74.19   | 77.53   | 83.17   |
| 83.54    | 88.59   | 93.30   | 95.05   | 98.11   | 99.54   |
| 103.14   | 109.23  | 116.08  | 121.31  | 123.89  | 132.27  |
| 135.41   | 144.35  | 161.61  | 163.63  | 169.17  | 175.51  |
| 185.19   | 188.55  | 197.59  | 201.80  | 207.71  | 208.75  |
| 211.49   | 214.32  | 215.43  | 220.39  | 223.58  | 230.56  |
| 231.90   | 235.66  | 238.79  | 240.31  | 258.69  | 267.37  |
| 275.35   | 275.81  | 280.12  | 283.82  | 288.33  | 291.60  |
| 293.53   | 305.40  | 312.27  | 318.85  | 325.22  | 340.29  |
| 344.30   | 344.89  | 378.39  | 387.73  | 394.87  | 398.53  |
| 400.85   | 413.26  | 419.62  | 423.53  | 425.01  | 436.12  |
| 442.32   | 448.25  | 450.01  | 453.20  | 459.76  | 474.56  |
| 486.76   | 491.65  | 505.01  | 519.13  | 522.40  | 524.26  |
| 527.05   | 531.97  | 536.52  | 541.05  | 545.28  | 552.54  |
| 555.99   | 567.15  | 577.81  | 580.27  | 590.42  | 609.30  |
| 622.08   | 627.77  | 632.41  | 633.71  | 638.15  | 649.74  |
| 653.68   | 677.14  | 689.76  | 705.24  | 712.00  | 714.64  |
| 719.08   | 732.92  | 738.88  | 742.94  | 750.93  | 761.08  |
| 770.40   | 775.33  | 785.52  | 789.42  | 806.24  | 810.11  |
| 813.00   | 820.07  | 823.41  | 825.37  | 827.58  | 830.67  |
| 832.52   | 834.41  | 853.01  | 867.40  | 868.12  | 869.52  |
| 875.88   | 900.72  | 901.86  | 903.66  | 904.98  | 908.00  |
| 909.63   | 913.26  | 915.09  | 937.58  | 938.15  | 940.62  |
| 942.93   | 954.90  | 960.53  | 969.16  | 974.44  | 977.27  |
| 1000.80  | 1002.90 | 1004.32 | 1005.56 | 1007.22 | 1010.53 |
| 1018.11  | 1023.69 | 1026.64 | 1027.45 | 1040.76 | 1045.20 |
| 1046.24  | 1048.96 | 1055.73 | 1057.96 | 1067.63 | 1067.81 |
| 1072.33  | 1088.31 | 1091.01 | 1091.41 | 1094.51 | 1096.19 |
| 1100.80  | 1105.81 | 1113.09 | 1113.85 | 1118.39 | 1123.40 |
| 1136.56  | 1138.03 | 1144.17 | 1157.80 | 1163.72 | 1177.11 |
| 1178.36  | 1178.54 | 1181.58 | 1189.77 | 1191.51 | 1199.76 |
| 1200.99  | 1201.24 | 1205.37 | 1209.55 | 1209.90 | 1212.51 |
| 1215.42  | 1217.92 | 1218.70 | 1222.54 | 1229.41 | 1234.13 |
| 1235.29  | 1237.05 | 1240.68 | 1246.90 | 1257.46 | 1264.38 |
| 1274.99  | 1290.71 | 1293.15 | 1298.30 | 1300.18 | 1305.14 |
| 1307.31  | 1308.06 | 1309.48 | 1319.28 | 1324.88 | 1332.45 |
| 1333.73  | 1337.32 | 1337.72 | 1341.88 | 1345.45 | 1346.34 |
| 1366.24  | 1367.65 | 1370.47 | 1372.76 | 1375.74 | 1376.29 |
| 1379.35  | 1381.81 | 1383.05 | 1385.15 | 1388.23 | 1393.33 |
| 1394.22  | 1394.94 | 1395.79 | 1397.02 | 1398.58 | 1400.78 |
| 1403.84  | 1404.83 | 1449.05 | 1456.53 | 1466.72 | 1479.36 |
| 1487.07  | 1490.45 | 1492.19 | 1493.41 | 1494.02 | 1496.15 |
| 1498.86  | 1500.10 | 1500.56 | 1501.32 | 1501.96 | 1502.45 |
| 1503.07  | 1504.68 | 1507.07 | 1507.52 | 1507.77 | 1508.28 |
| 1509.56  | 1510.66 | 1510.96 | 1512.31 | 1514.09 | 1516.06 |
| 1518.22  | 1518.80 | 1520.61 | 1522.84 | 1525.64 | 1526.13 |
| 1528.60  | 1541.71 | 1547.16 | 1589.20 | 1604.74 | 1635.63 |

1640.69 1649.34 1654.85 1659.96 1672.07 2041.05  
 2994.22 3009.11 3014.60 3017.00 3019.26 3019.33  
 3020.91 3021.18 3022.14 3023.82 3024.80 3025.75  
 3026.36 3027.02 3028.33 3038.12 3046.06 3047.09  
 3059.34 3061.31 3065.51 3068.22 3070.74 3073.55  
 3074.82 3076.30 3079.31 3080.63 3081.43 3082.30  
 3084.41 3087.27 3089.84 3091.73 3095.77 3117.46  
 3117.62 3129.58 3133.89 3134.70 3150.85 3160.04  
 3161.58 3162.53 3162.55 3164.44 3183.14 3184.84  
 3190.93 3194.20 3204.47 3205.69 3210.88 3211.80  
 3215.81 3225.38 3229.94 3230.54 3235.93 3255.25  
 3407.53 3819.11 3827.29

=====  
 12'  
 =====

4.96 13.56 17.50 20.29 25.52 32.52  
 38.91 40.30 44.66 47.56 49.95 55.06  
 63.74 65.58 68.12 72.91 75.53 79.96  
 84.85 87.71 92.61 94.02 95.43 96.81  
 105.05 108.26 111.91 122.49 127.01 133.12  
 143.32 145.94 154.31 158.38 160.76 166.18  
 173.06 179.25 180.49 189.90 191.93 201.38  
 201.96 209.02 209.07 214.37 221.71 223.67  
 229.45 230.73 234.53 238.79 239.64 259.82  
 271.69 273.97 276.47 278.08 282.12 283.48  
 286.04 293.54 304.93 310.07 326.60 338.44  
 349.37 351.48 367.82 368.95 381.21 386.51  
 395.41 398.14 401.44 416.32 425.01 429.99  
 432.94 434.66 436.53 444.06 445.11 451.11  
 451.69 461.73 476.46 501.09 503.48 514.15  
 519.78 524.20 530.43 534.57 539.14 542.73  
 546.88 549.22 553.69 572.21 583.32 590.42  
 599.34 607.80 609.82 627.70 631.03 635.66  
 637.10 646.14 655.71 660.09 679.51 709.34  
 711.24 713.12 714.94 719.99 735.56 739.68  
 741.18 753.38 779.48 783.87 795.18 797.76  
 807.70 808.55 813.63 822.25 824.92 825.77  
 830.03 835.91 848.17 860.27 864.82 867.12  
 868.77 872.33 897.94 900.92 904.41 905.86  
 909.57 910.14 914.90 934.13 936.49 942.16  
 942.66 948.88 952.60 958.24 964.35 979.54  
 981.47 996.15 1007.04 1008.41 1012.86 1018.11  
 1021.03 1024.10 1027.47 1027.85 1040.51 1041.45  
 1045.13 1048.80 1056.69 1059.71 1062.49 1070.37  
 1073.61 1087.87 1088.79 1089.37 1093.78 1095.61  
 1100.83 1109.07 1114.21 1115.03 1118.18 1123.10  
 1125.25 1139.47 1144.47 1159.90 1164.56 1178.81  
 1179.56 1180.60 1185.68 1187.62 1199.21 1200.15  
 1200.70 1201.68 1206.94 1210.85 1213.45 1219.38  
 1219.88 1221.97 1228.41 1229.51 1232.69 1239.06  
 1241.40 1242.07 1248.34 1252.92 1268.92 1269.45  
 1287.79 1292.42 1298.60 1301.86 1305.02 1308.31  
 1309.78 1313.18 1323.74 1331.80 1334.38 1334.67  
 1339.55 1341.11 1344.12 1345.78 1351.45 1365.53  
 1367.95 1369.50 1369.97 1373.33 1373.51 1377.86  
 1381.95 1383.03 1383.97 1393.56 1394.41 1395.61  
 1396.39 1397.32 1398.33 1398.60 1402.58 1406.41  
 1407.06 1456.38 1464.50 1481.45 1482.24 1486.90  
 1488.63 1491.95 1494.71 1495.61 1498.05 1499.32  
 1500.49 1500.82 1501.48 1501.65 1502.99 1503.80  
 1504.21 1505.36 1507.92 1507.93 1509.96 1511.67  
 1512.56 1512.93 1518.02 1518.61 1521.20 1521.65  
 1522.94 1526.31 1527.47 1530.07 1536.61 1552.73  
 1611.06 1619.51 1625.16 1632.24 1646.47 1649.93  
 1653.81 1656.70 1667.89 1685.30 2065.06 3017.05  
 3017.62 3019.31 3019.72 3021.17 3021.67 3022.02  
 3025.24 3025.99 3027.63 3028.19 3029.90 3032.79

3035.67 3039.47 3042.72 3044.37 3047.27 3061.16  
3064.49 3066.55 3069.39 3076.18 3076.93 3081.65  
3082.48 3083.75 3083.94 3084.41 3086.17 3087.54  
3087.95 3092.10 3094.78 3096.47 3105.03 3113.53  
3115.29 3124.81 3127.66 3132.31 3158.02 3159.03  
3160.75 3163.62 3172.93 3176.58 3183.96 3188.92  
3193.23 3198.80 3206.01 3208.52 3210.46 3214.50  
3217.32 3229.51 3231.65 3246.06 3271.85 3751.12  
3773.84 3825.89 3827.66

---

---

**Ketone**

---

---

49.29 87.99 99.65 131.78 162.72 205.34  
253.89 296.92 349.44 415.67 429.31 441.63  
465.99 510.58 582.26 627.07 629.91 630.61  
681.71 708.54 721.77 770.43 788.45 805.78  
821.20 871.17 896.62 935.60 952.94 995.40  
996.02 999.43 1008.05 1009.19 1013.62 1019.78  
1026.12 1041.07 1056.80 1116.18 1121.37 1194.35  
1197.07 1203.08 1218.91 1229.94 1230.78 1278.51  
1310.65 1345.85 1364.66 1367.74 1423.12 1477.98  
1488.30 1498.11 1529.14 1534.43 1596.95 1628.68  
1648.96 1654.42 1723.28 2753.42 2798.26 3065.77  
3093.47 3117.31 3152.59 3169.28 3178.38 3186.35  
3193.35 3199.19 3204.53

---

---

**Z-enol**

---

---

43.18 51.16 82.85 95.12 168.91 207.80  
267.85 306.24 328.04 384.75 413.96 419.25  
425.16 496.65 534.31 582.18 627.94 630.45  
650.72 678.49 707.64 715.44 771.68 780.78  
828.26 849.80 852.34 865.77 876.76 930.12  
938.52 977.28 982.69 999.57 1003.33 1004.10  
1012.43 1048.64 1059.30 1078.46 1117.77 1120.27  
1195.80 1197.60 1219.42 1222.58 1237.63 1247.73  
1318.58 1336.24 1357.39 1367.26 1373.33 1415.25  
1487.18 1492.94 1534.47 1541.21 1625.93 1630.84  
1656.88 1661.55 1719.65 3165.45 3175.93 3176.86  
3183.44 3185.90 3188.08 3193.47 3201.61 3202.86  
3210.13 3253.11 3808.98

---

---

**E-enol**

---

---

37.13 50.06 77.99 124.81 162.35 202.16  
259.31 329.86 340.93 401.10 407.10 419.92  
431.24 496.00 520.61 590.43 619.36 634.58  
637.67 652.47 712.62 716.46 748.03 774.13  
788.74 859.02 867.22 871.54 881.15 931.61  
942.86 975.83 984.45 996.07 1003.66 1013.36  
1015.02 1053.54 1059.27 1104.04 1114.27 1131.18  
1195.01 1197.12 1215.29 1219.57 1224.13 1237.11  
1292.48 1339.09 1343.43 1365.05 1367.88 1421.59  
1485.96 1489.89 1536.19 1540.93 1627.76 1631.76  
1658.60 1660.59 1718.35 3168.19 3171.10 3177.74  
3177.87 3186.10 3187.76 3195.43 3200.82 3205.97  
3212.96 3221.95 3800.37

## 9. $^1\text{H}$ and $^{13}\text{C}$ NMR Spectra of Products.

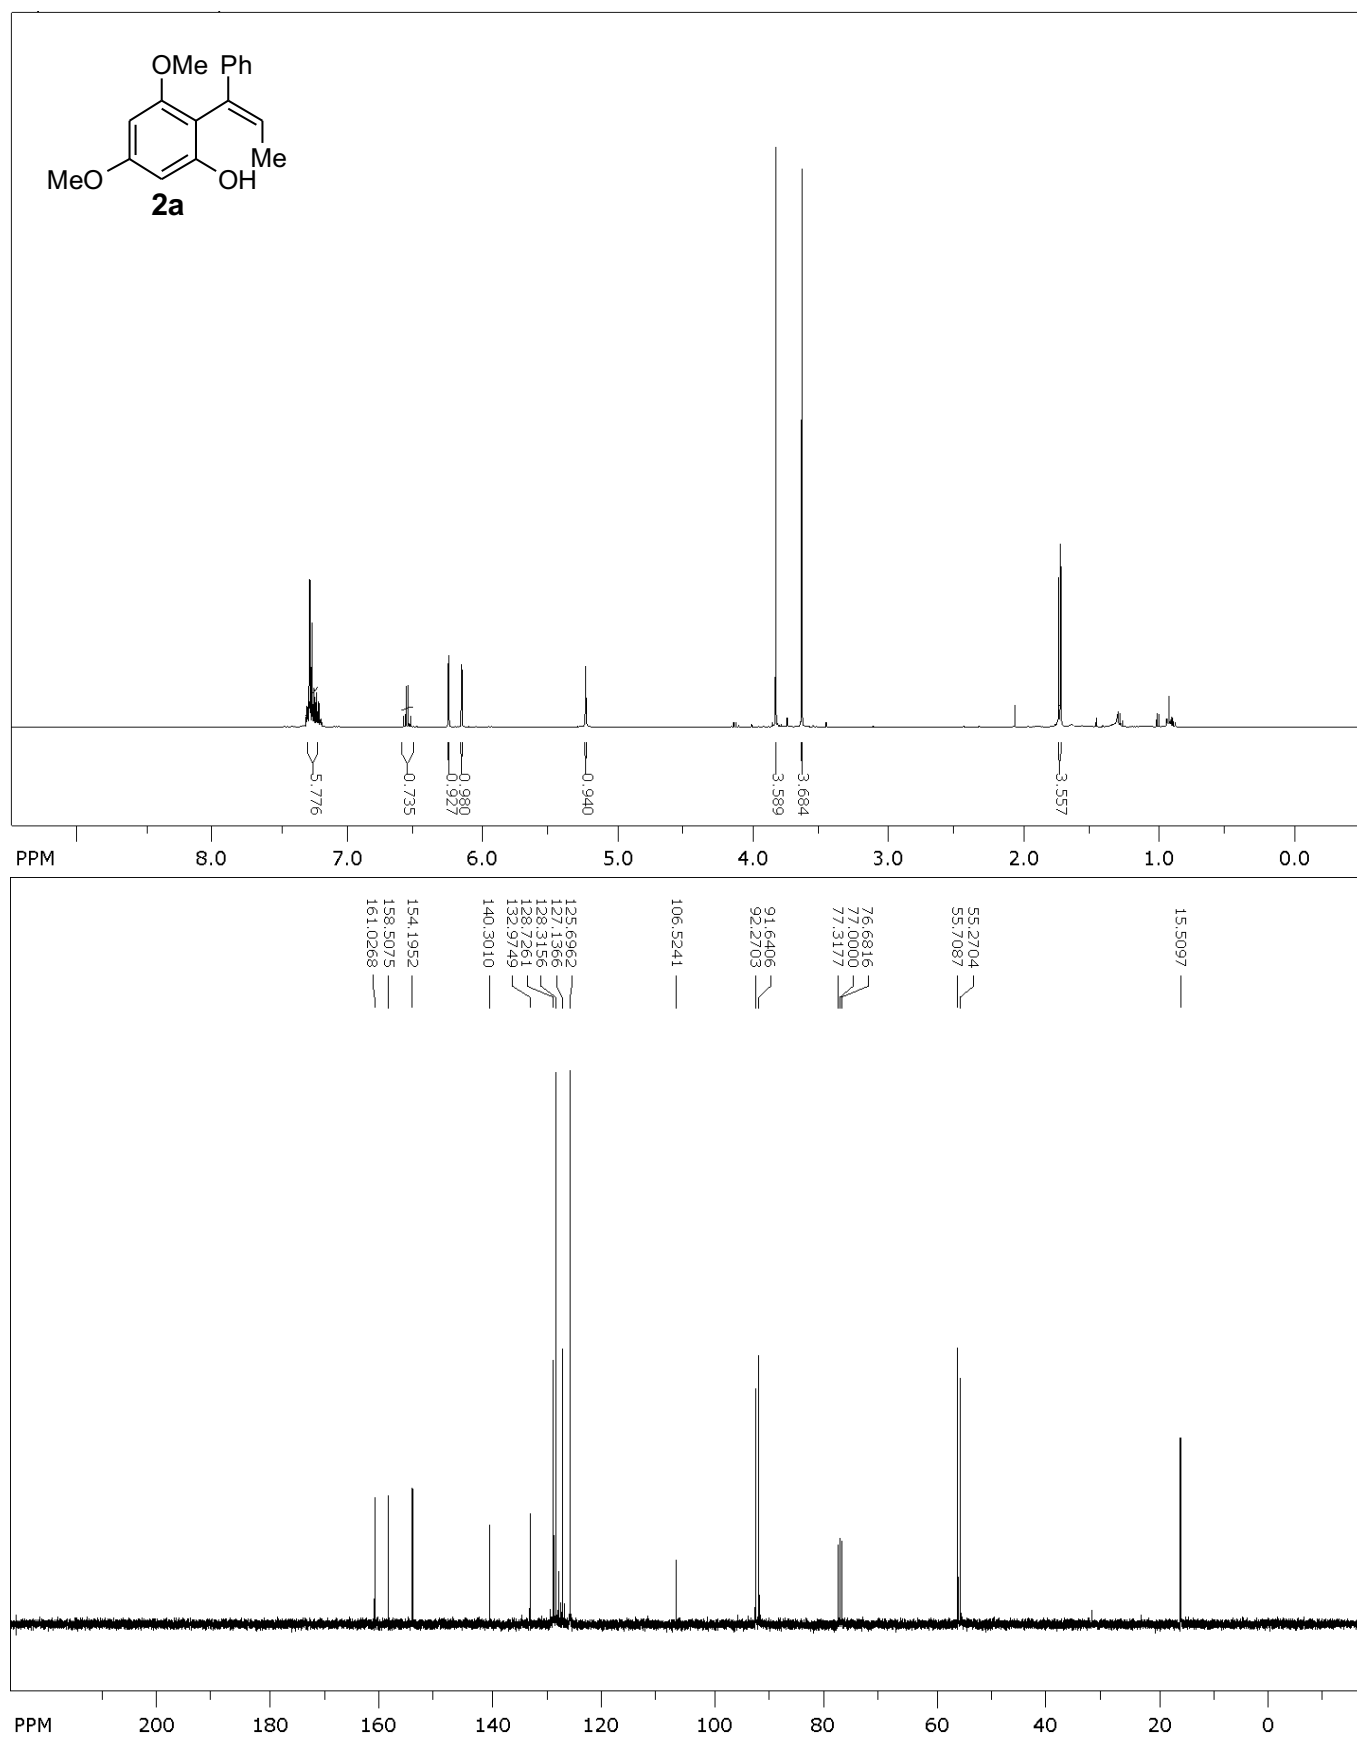

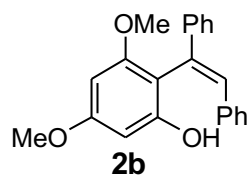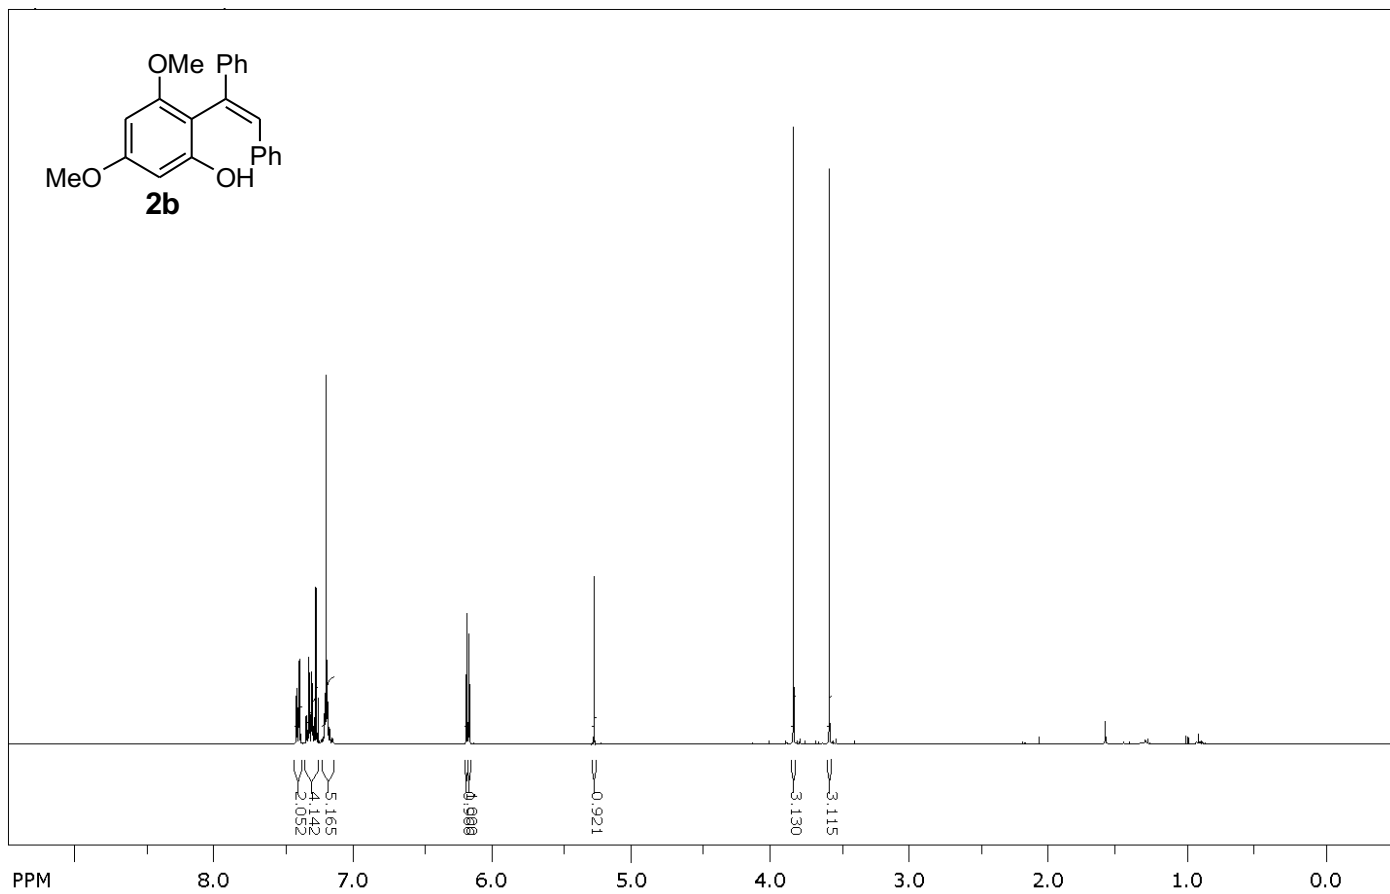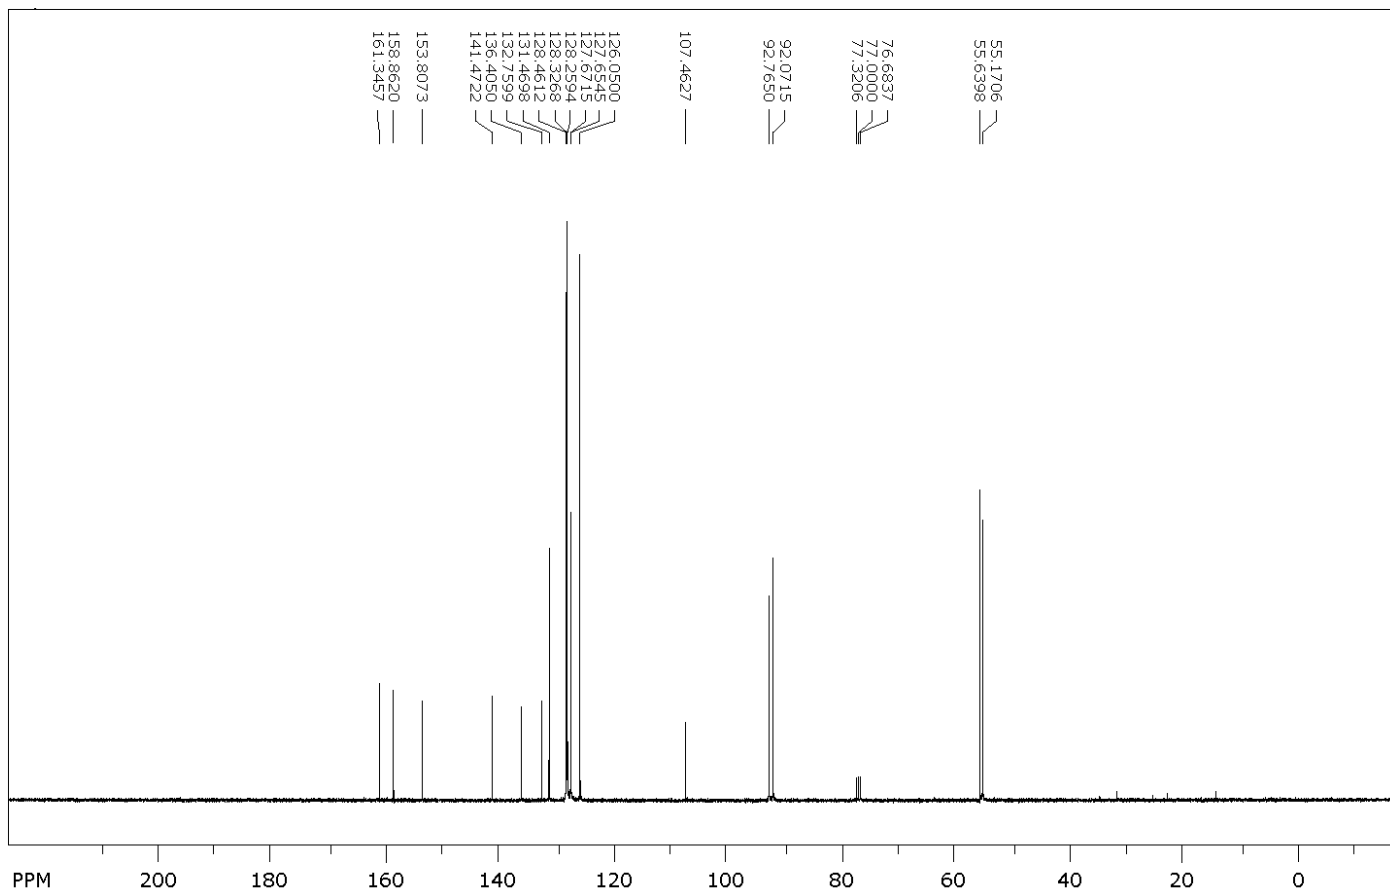

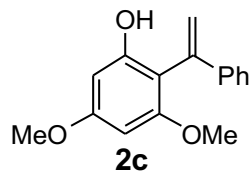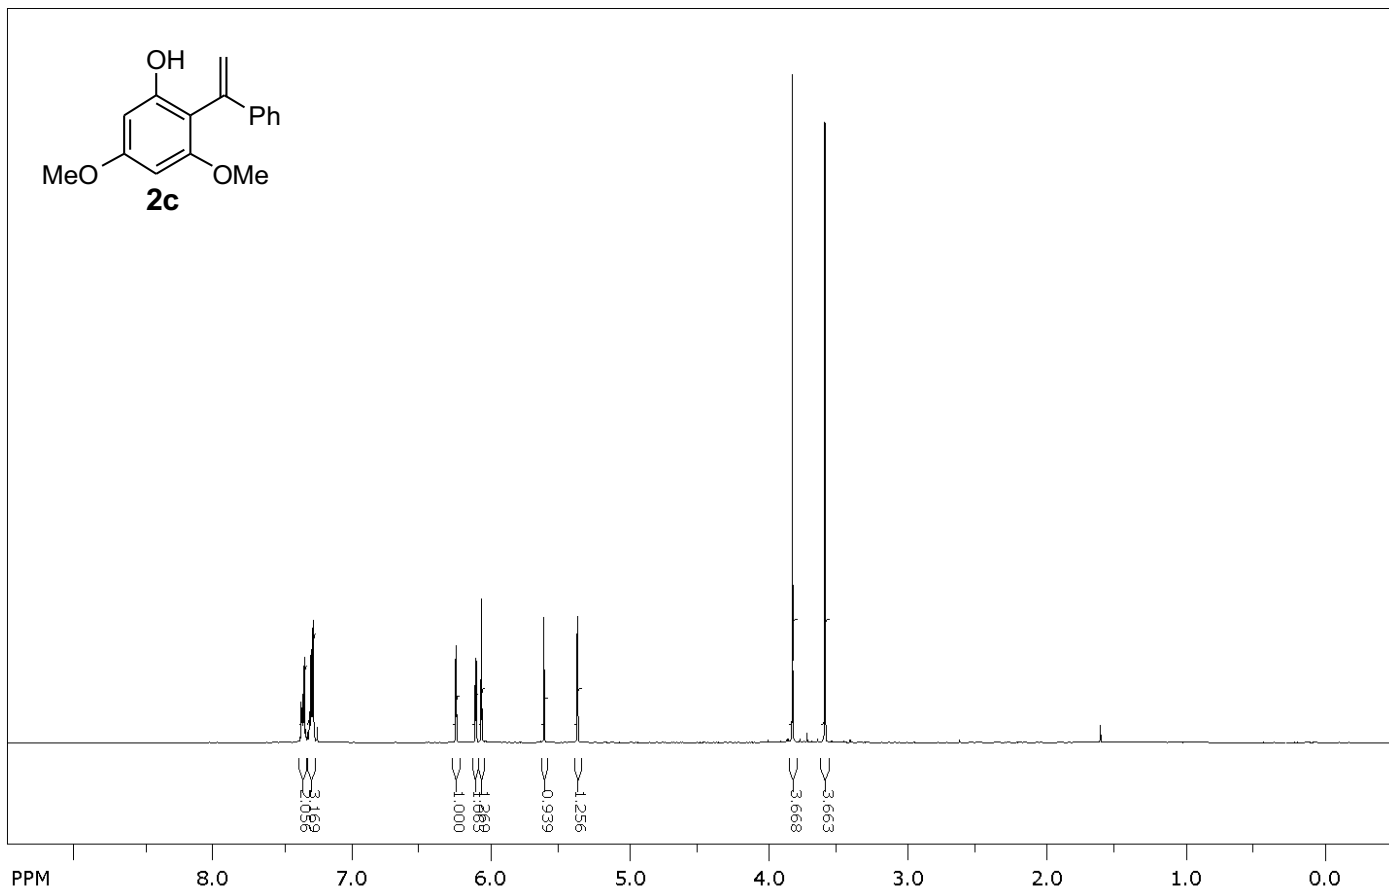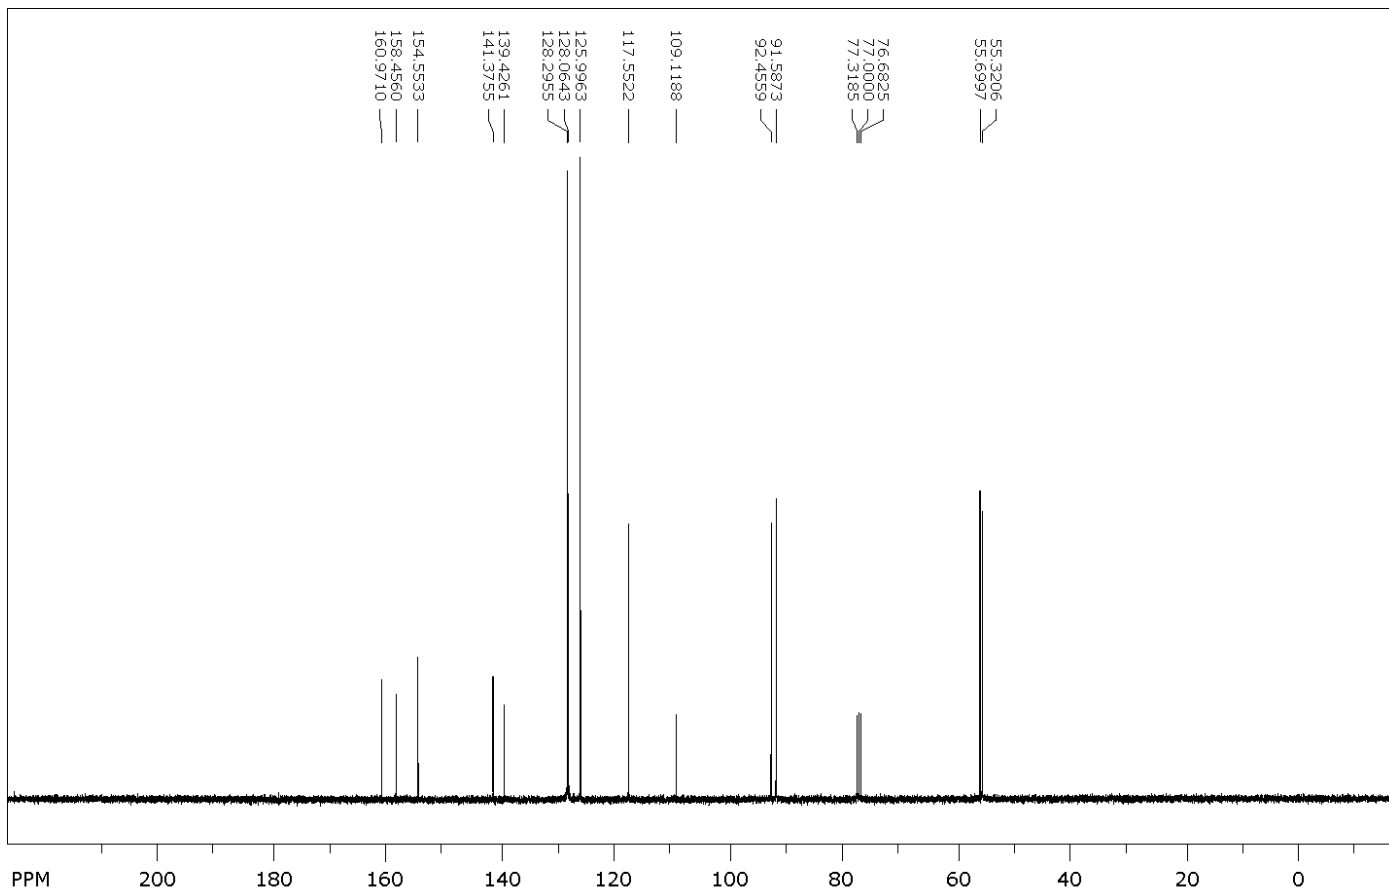

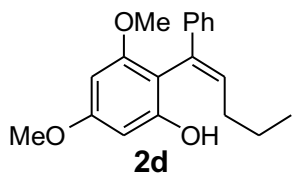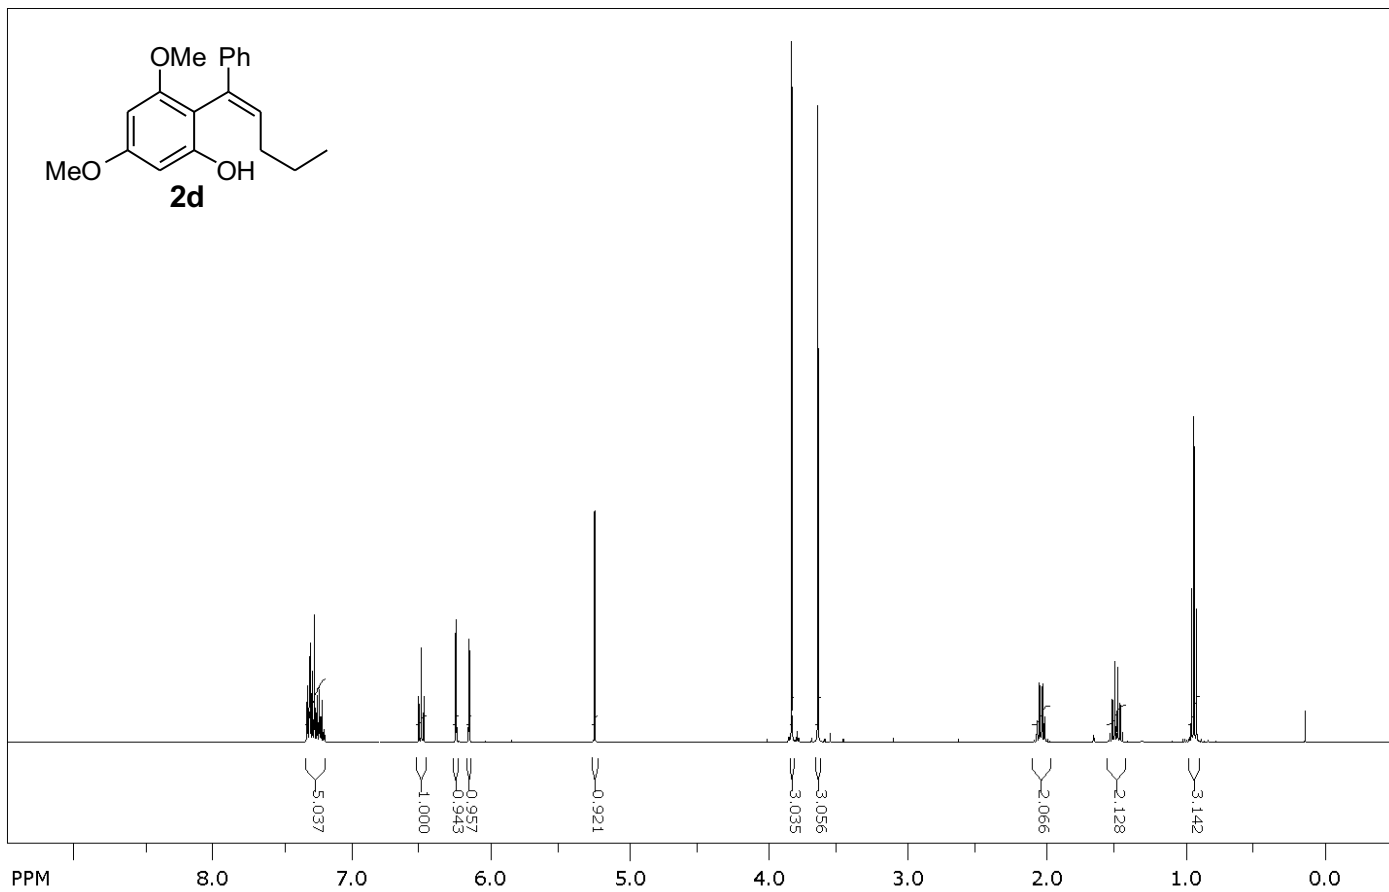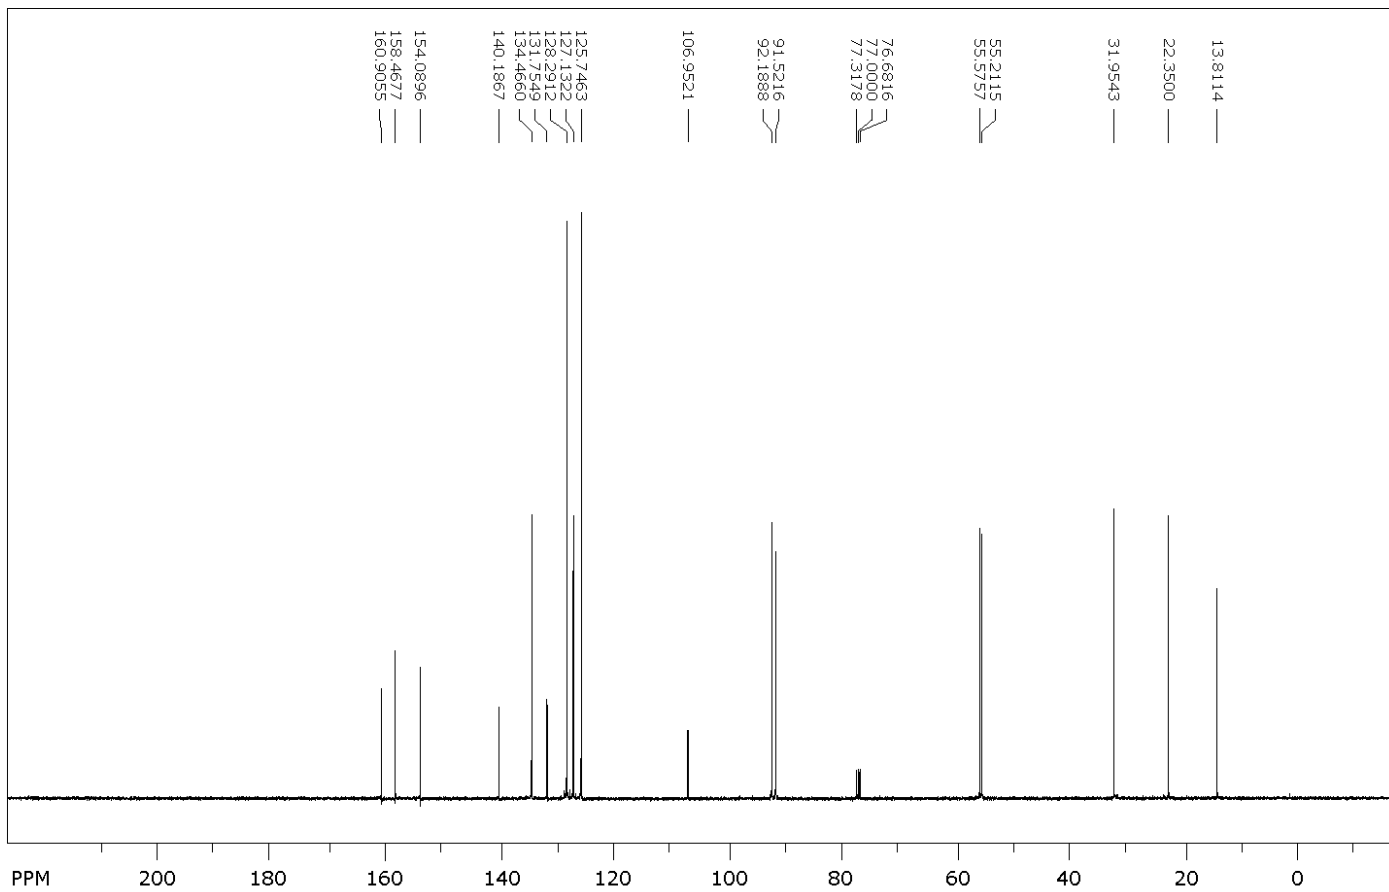



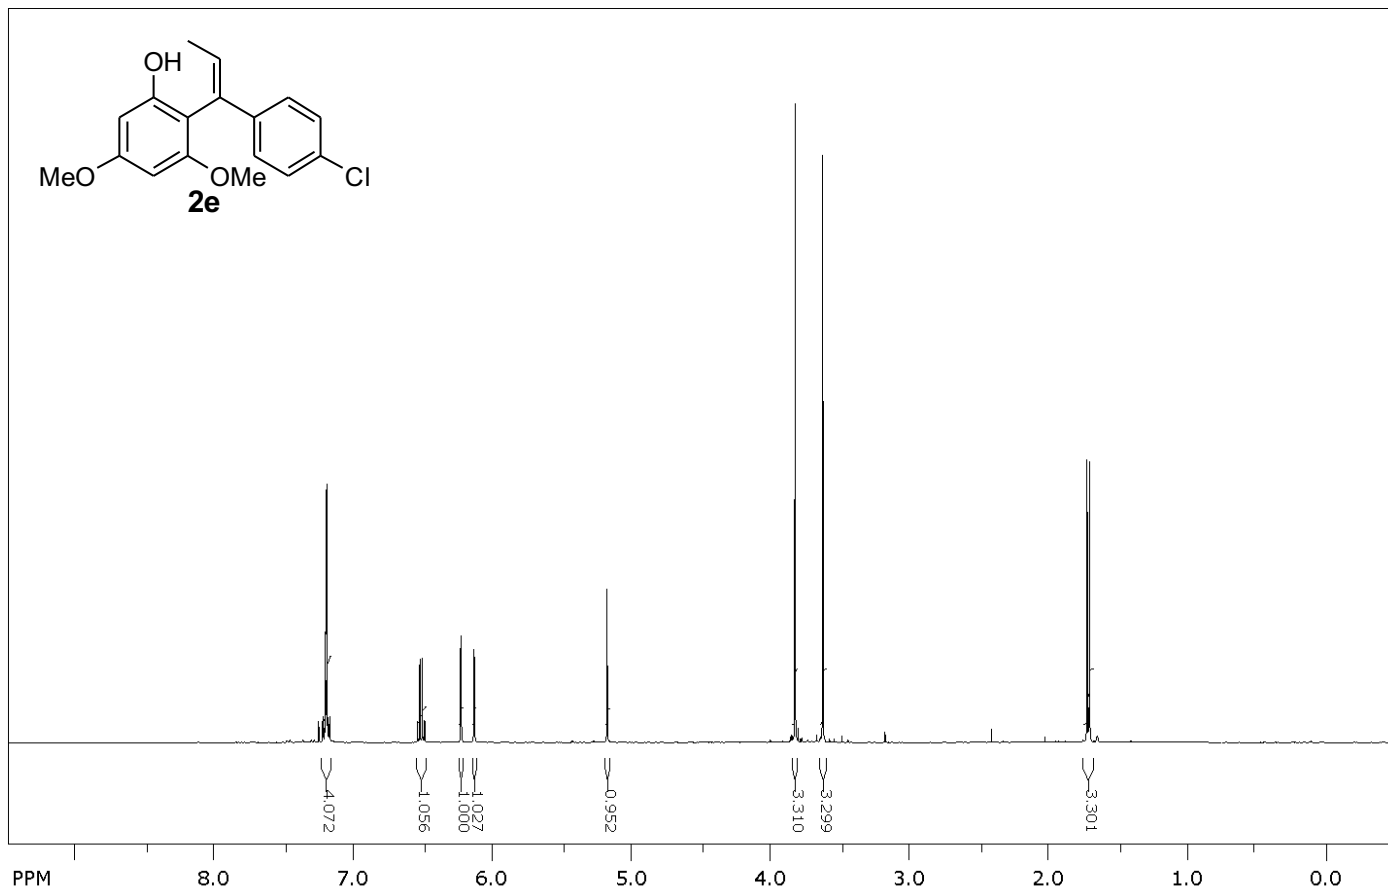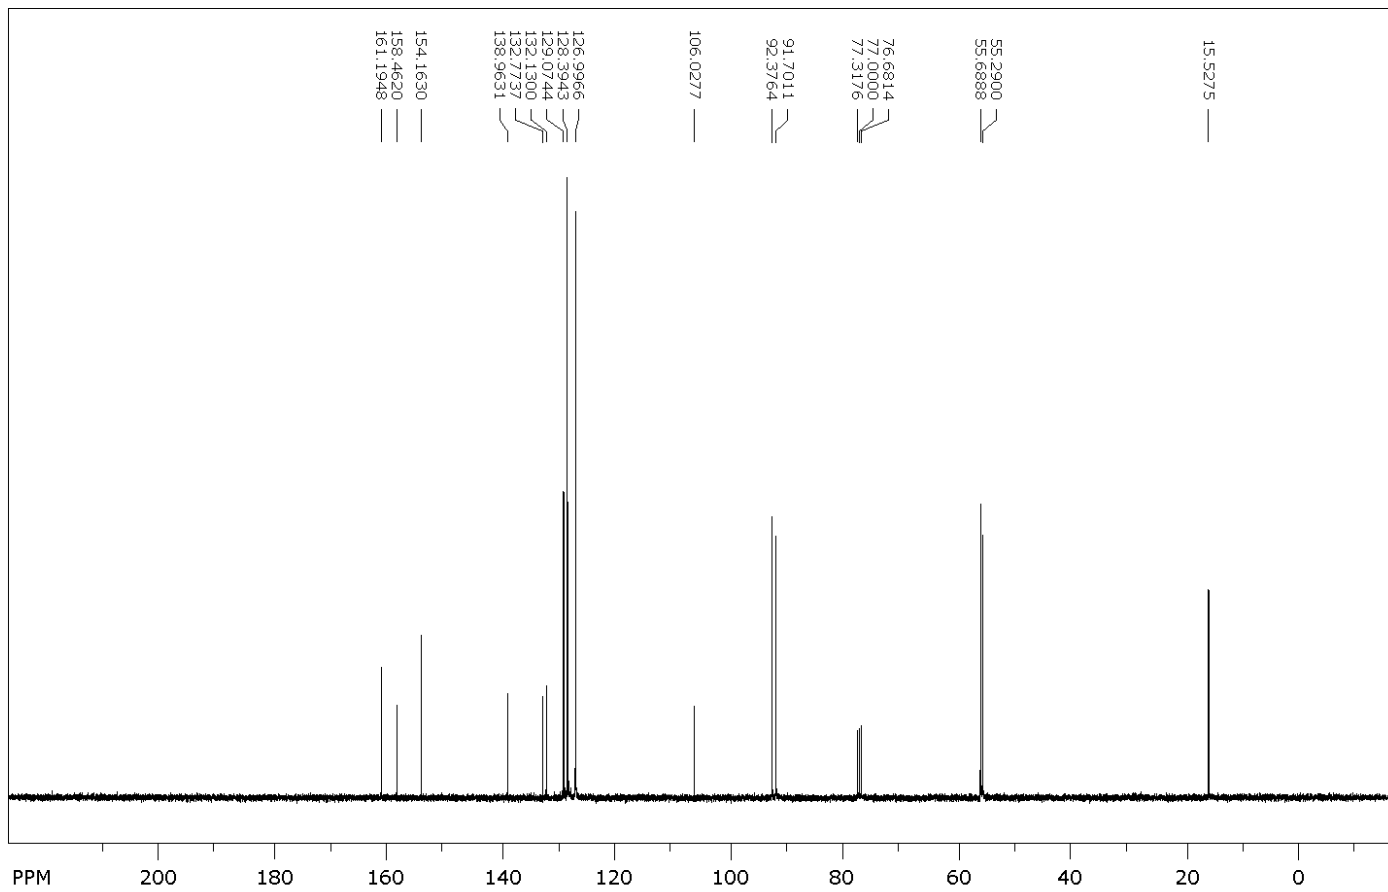

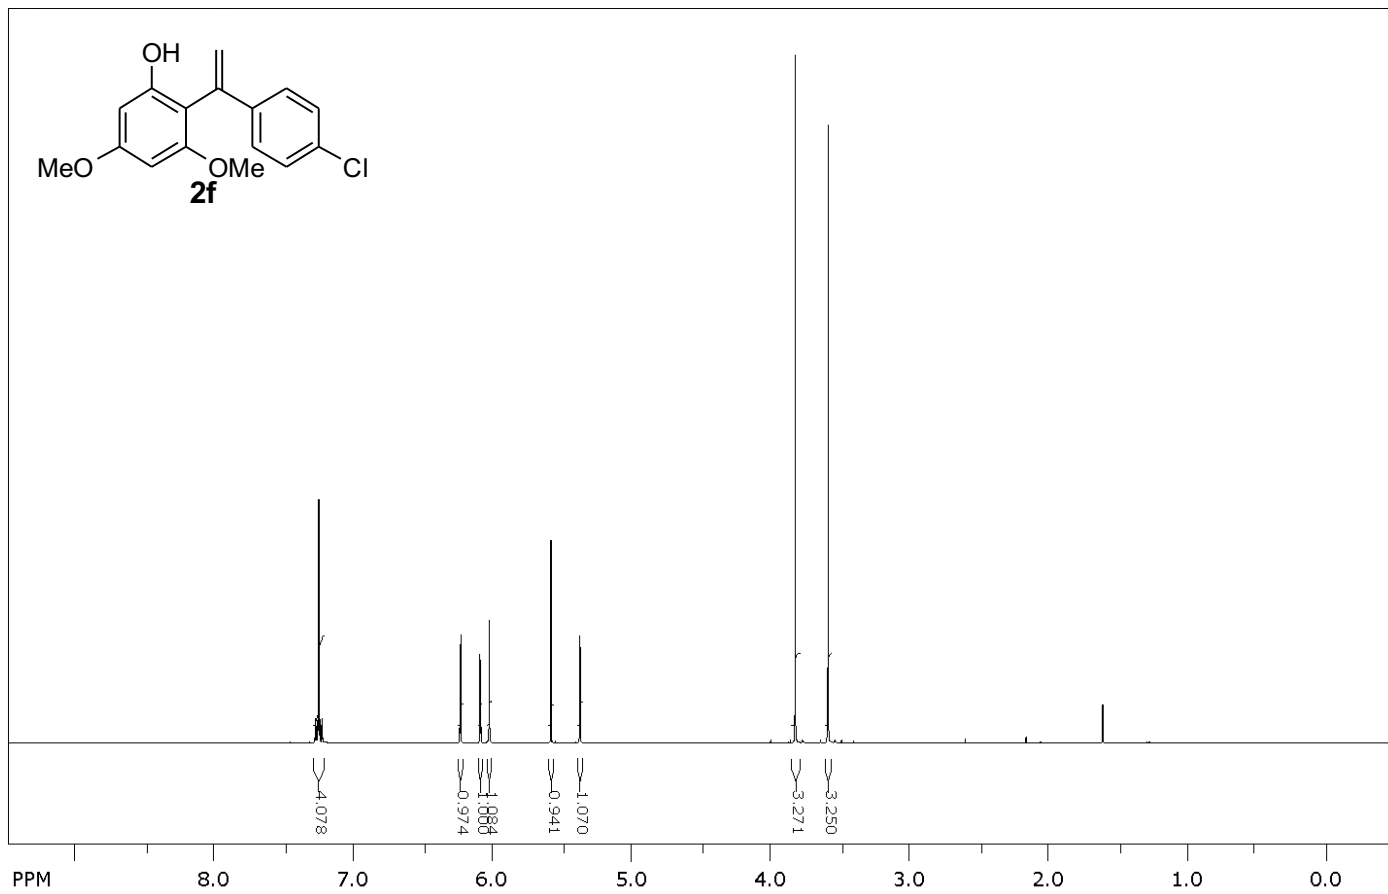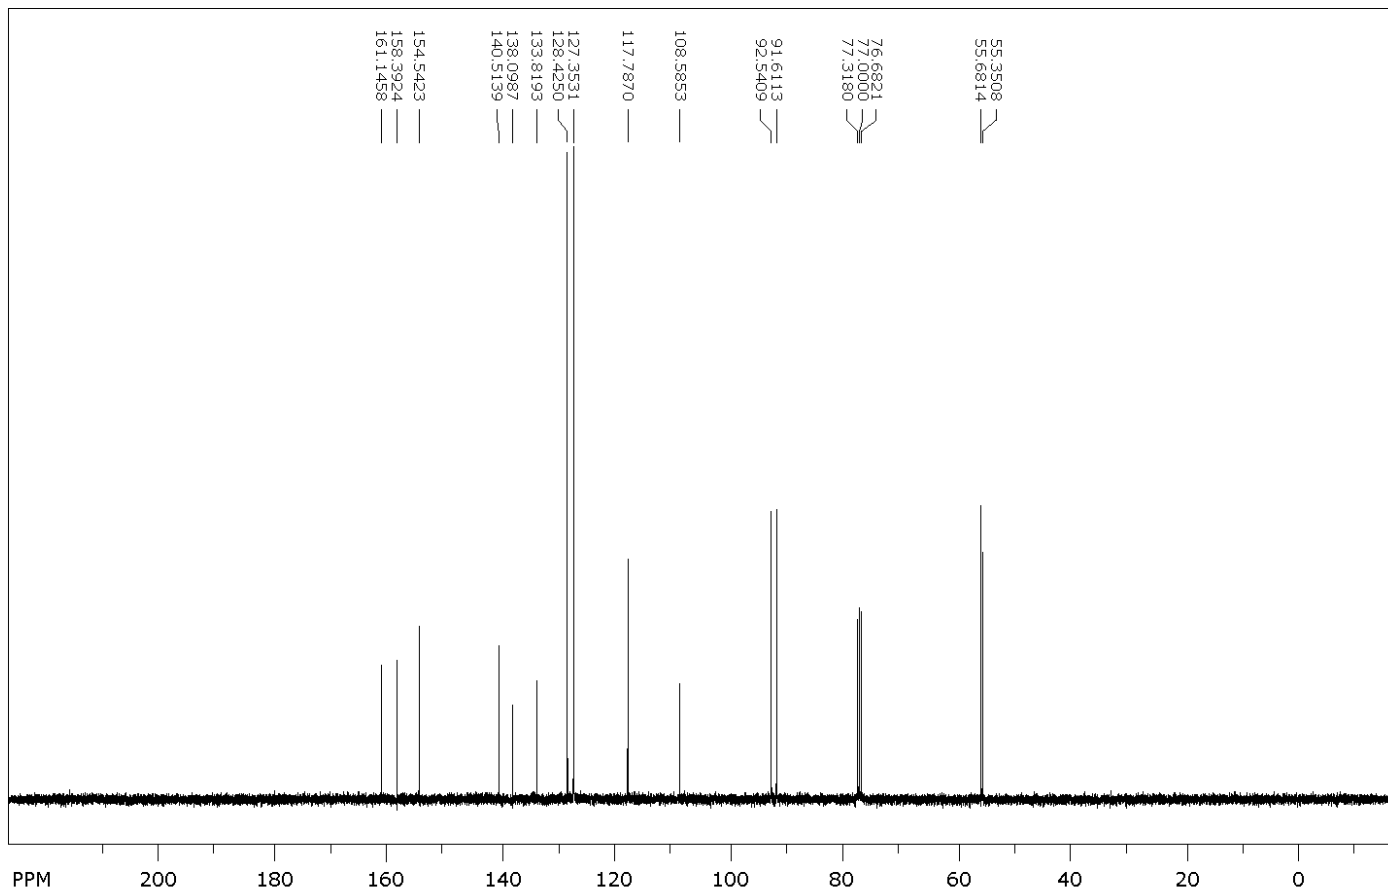

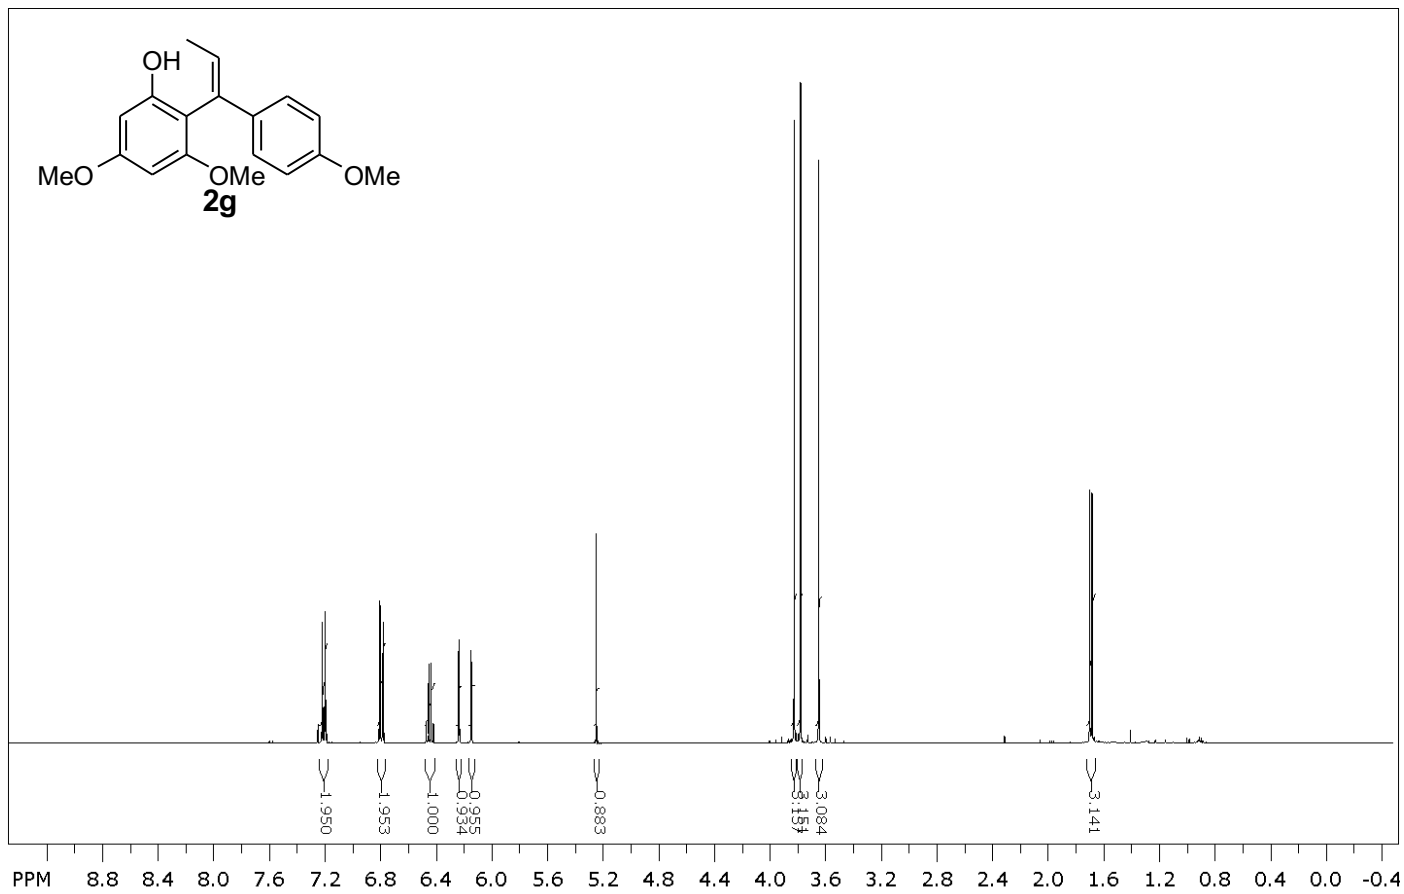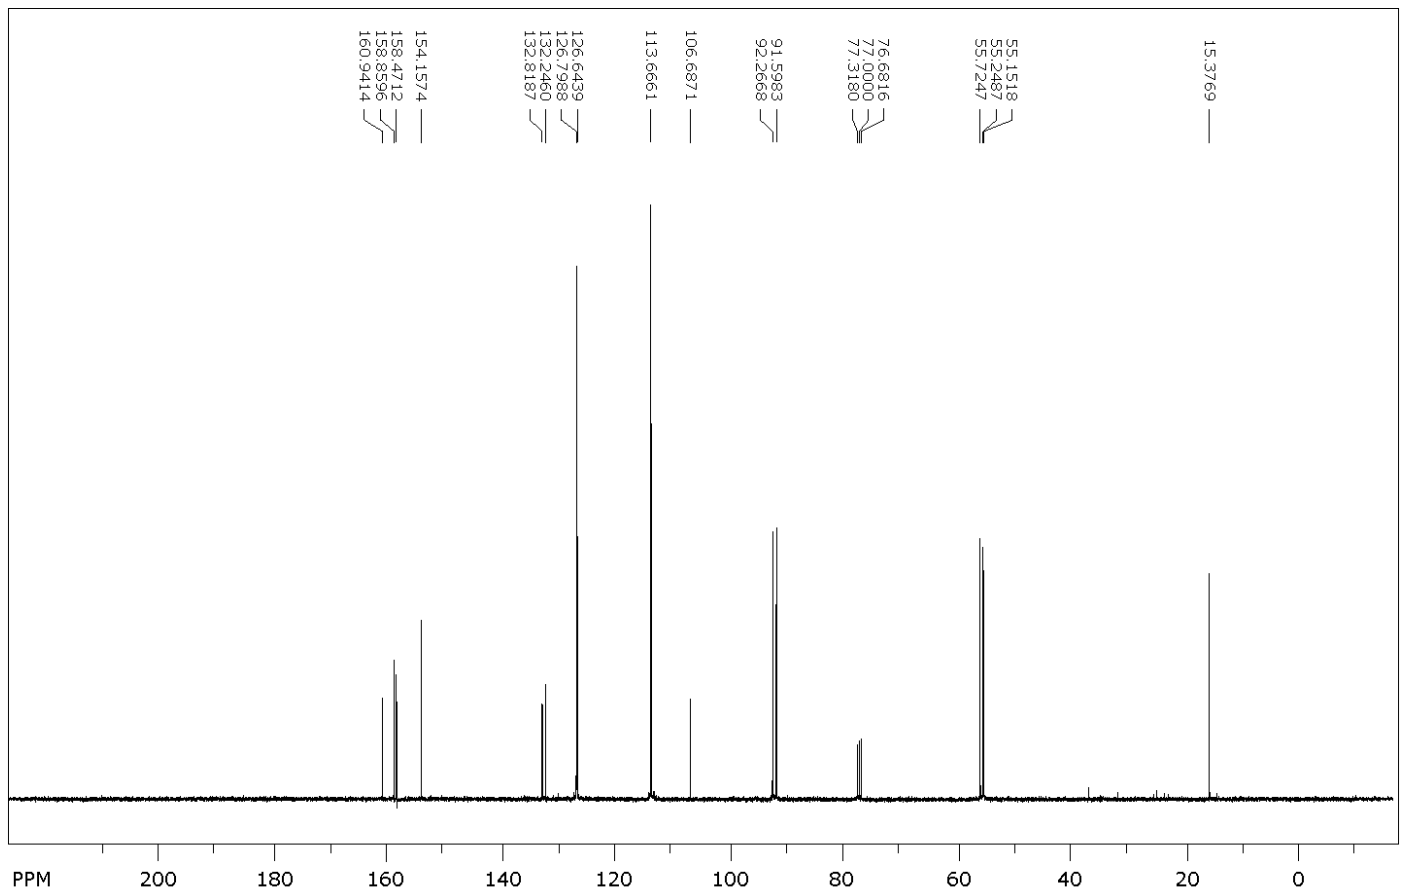

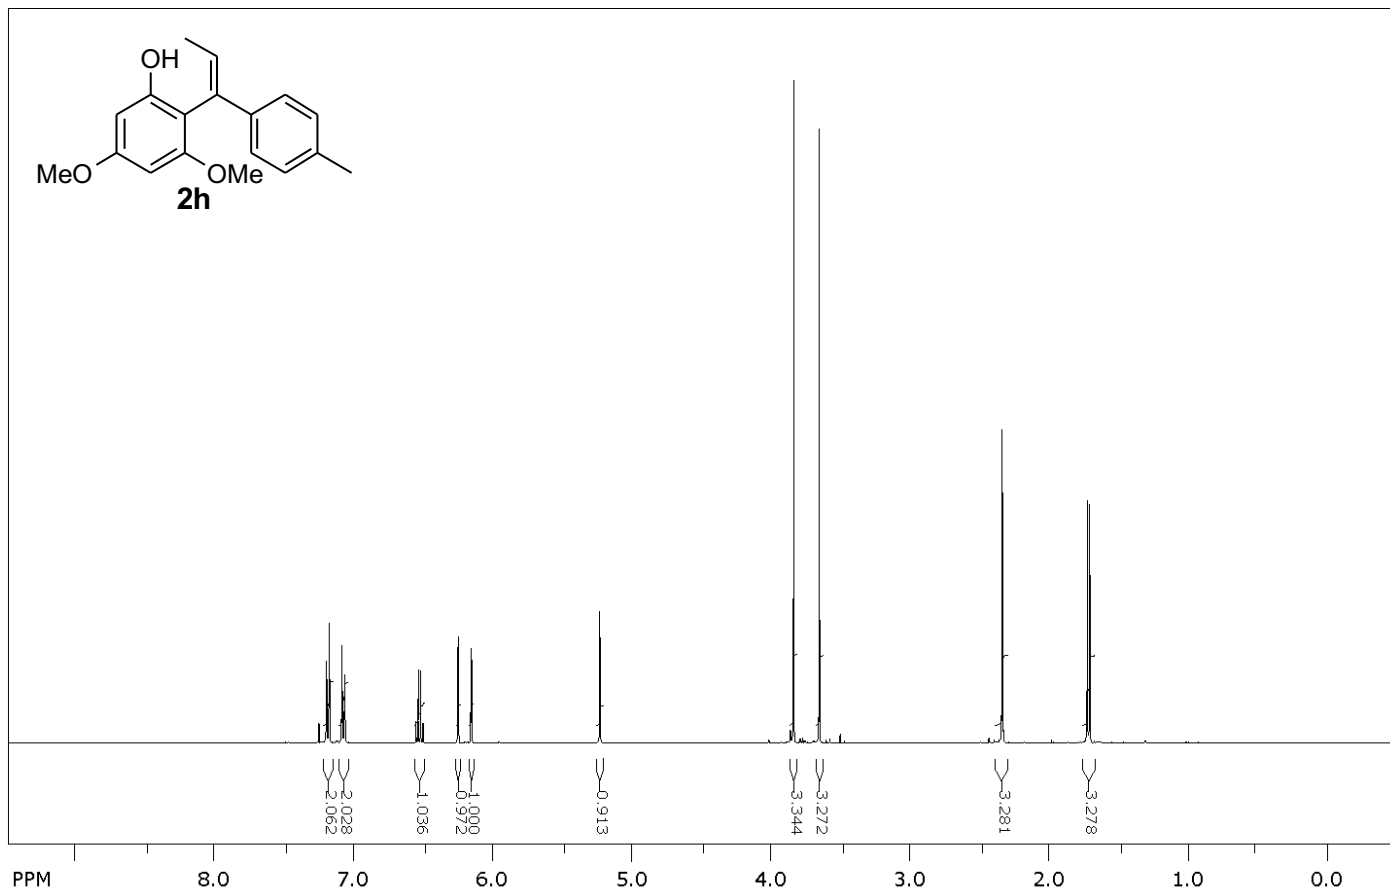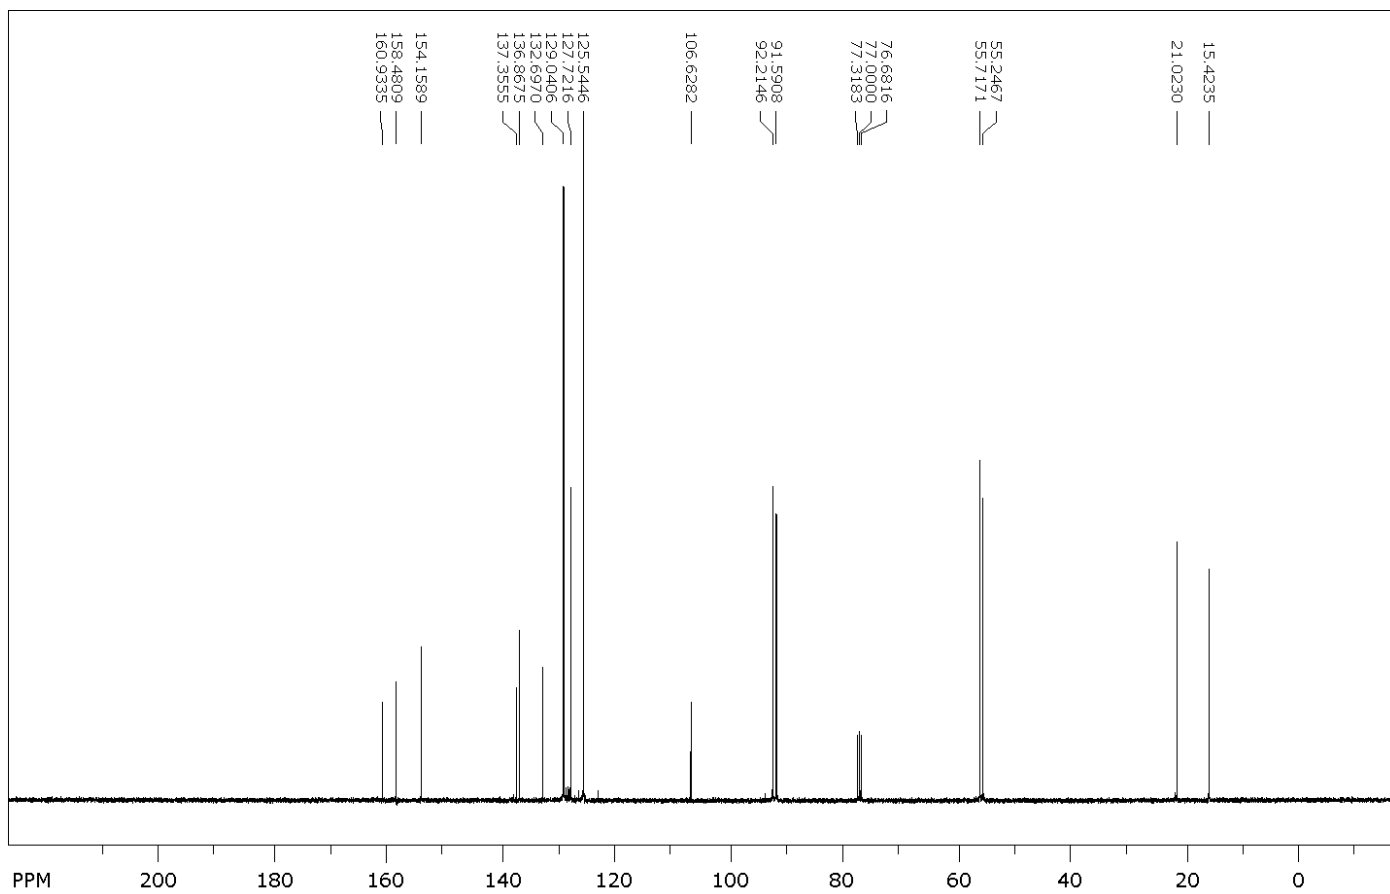

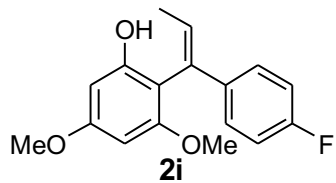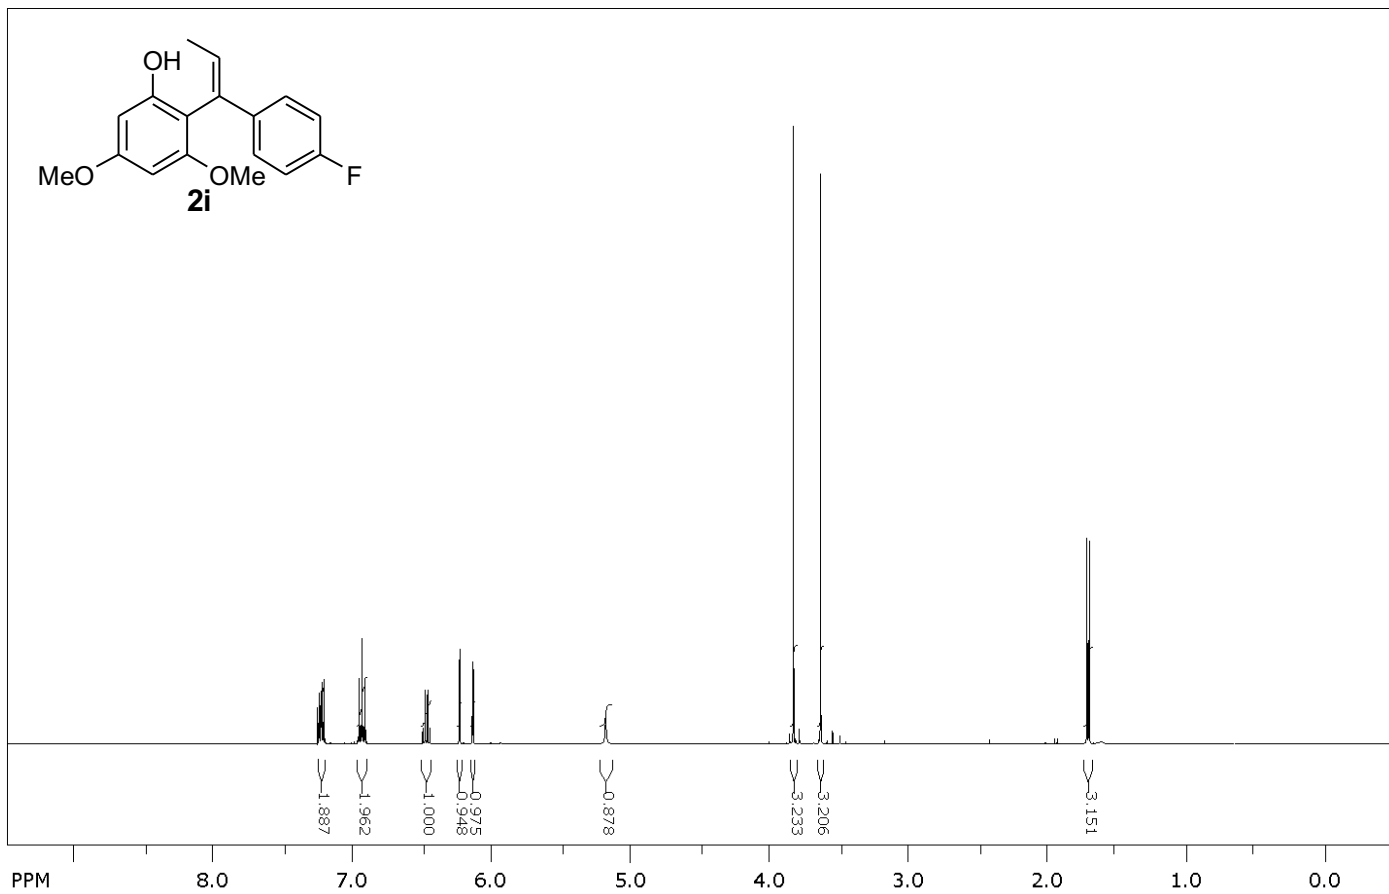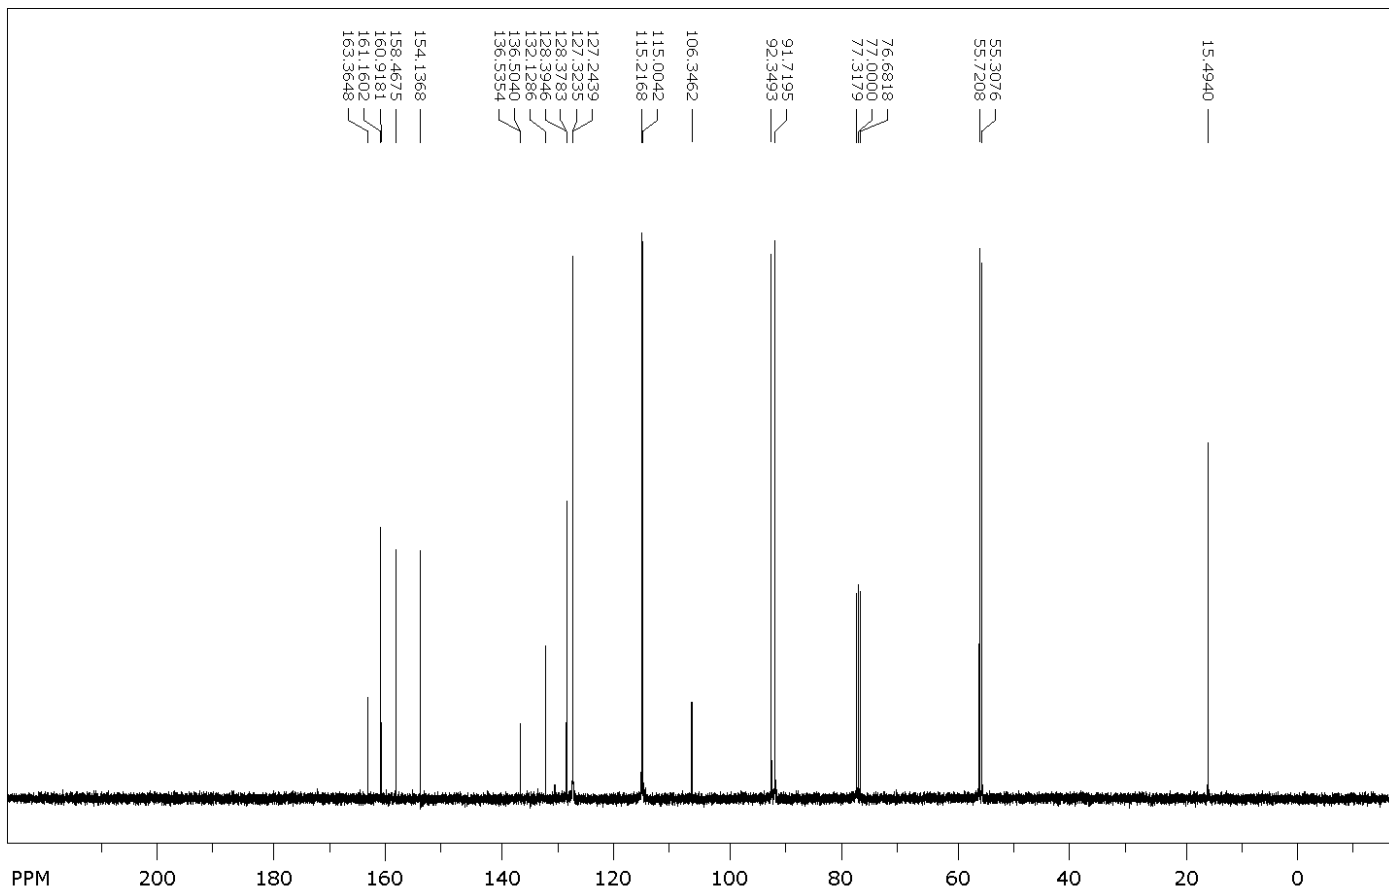

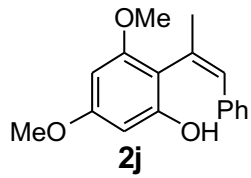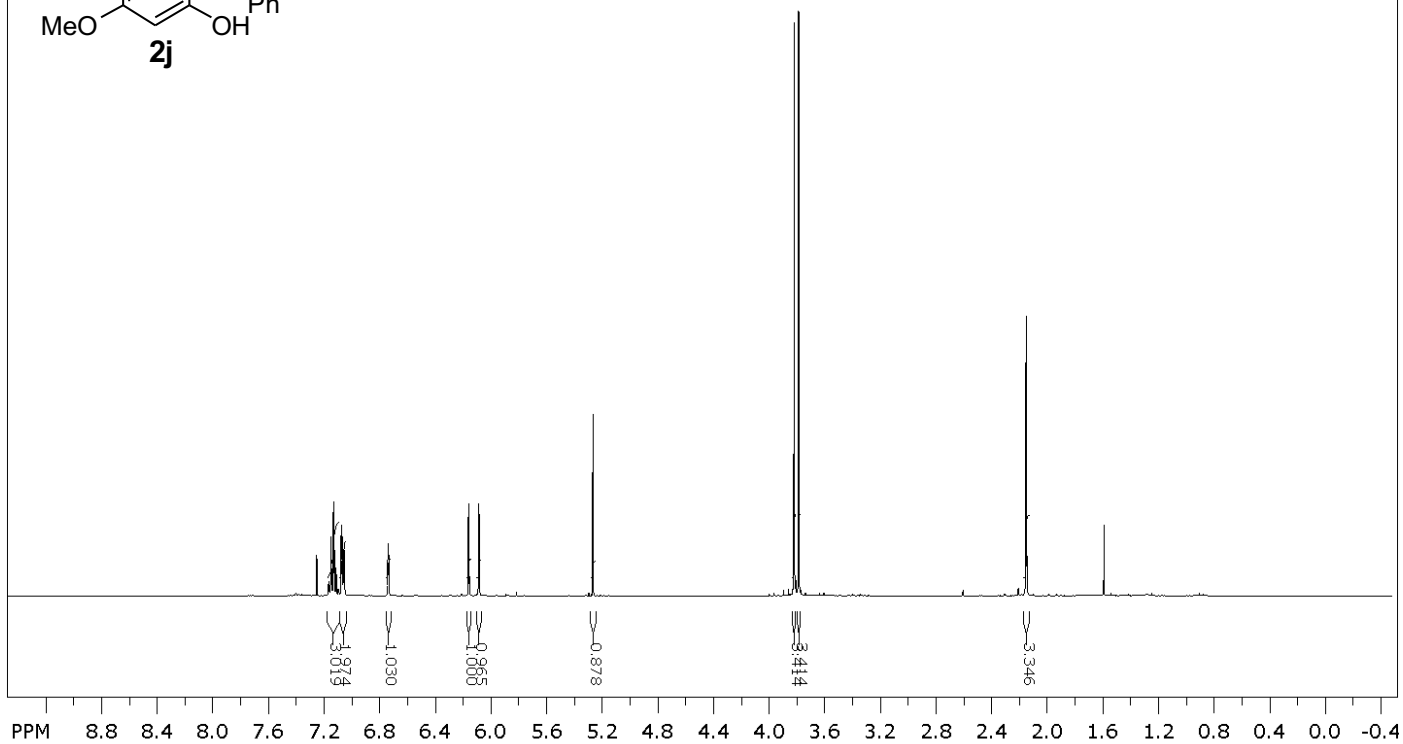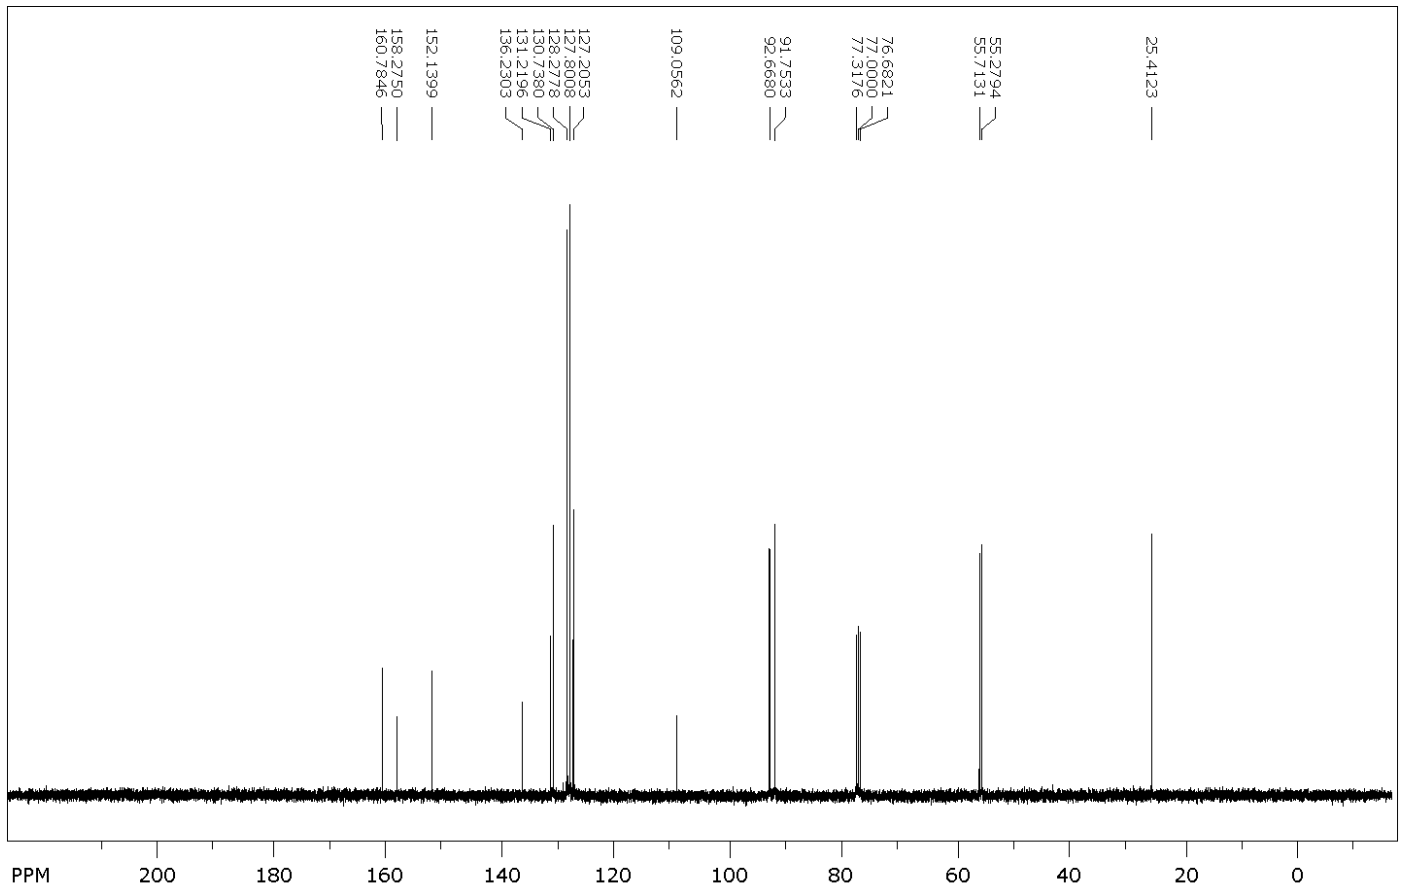

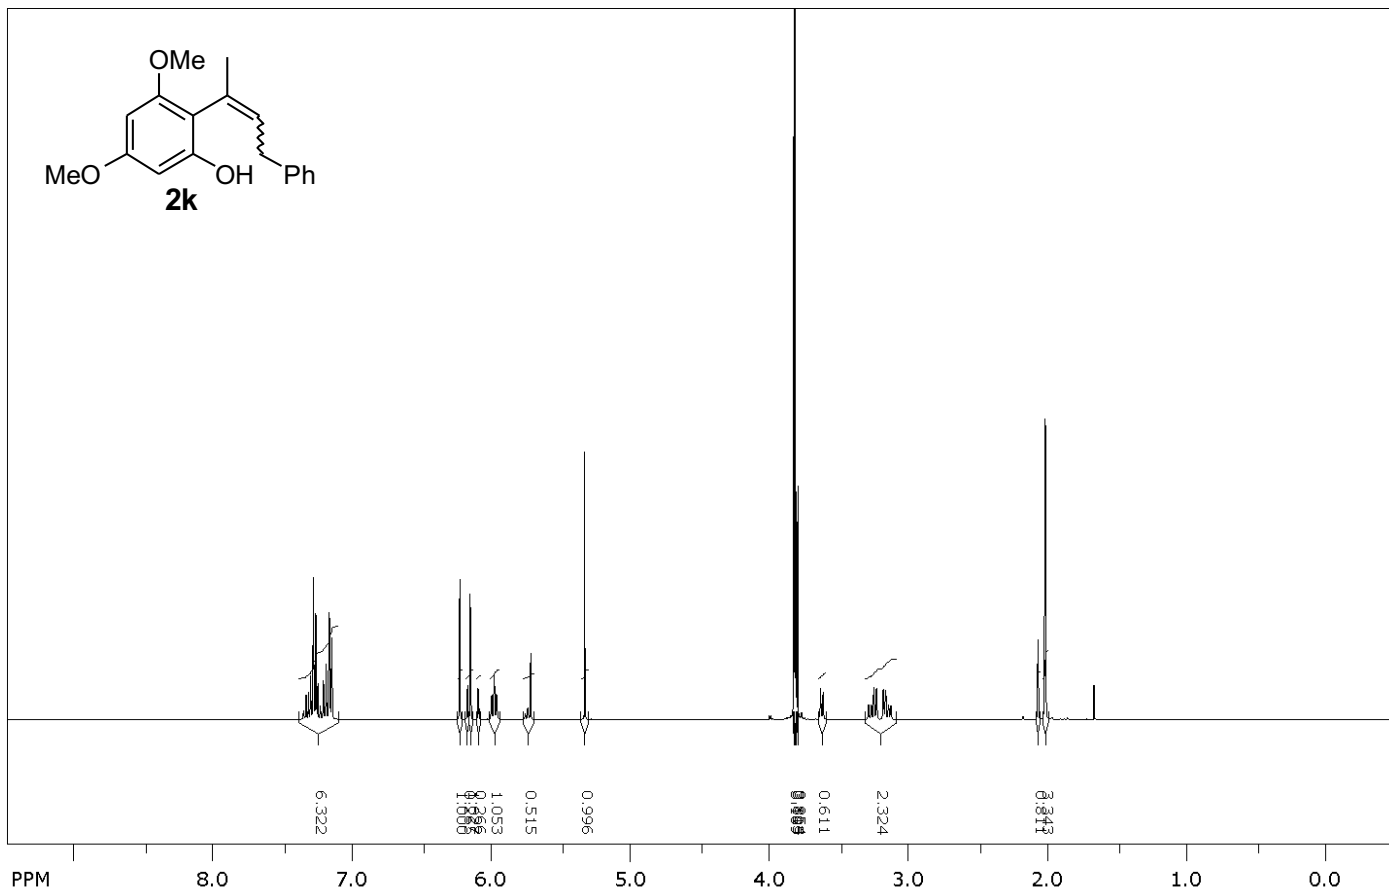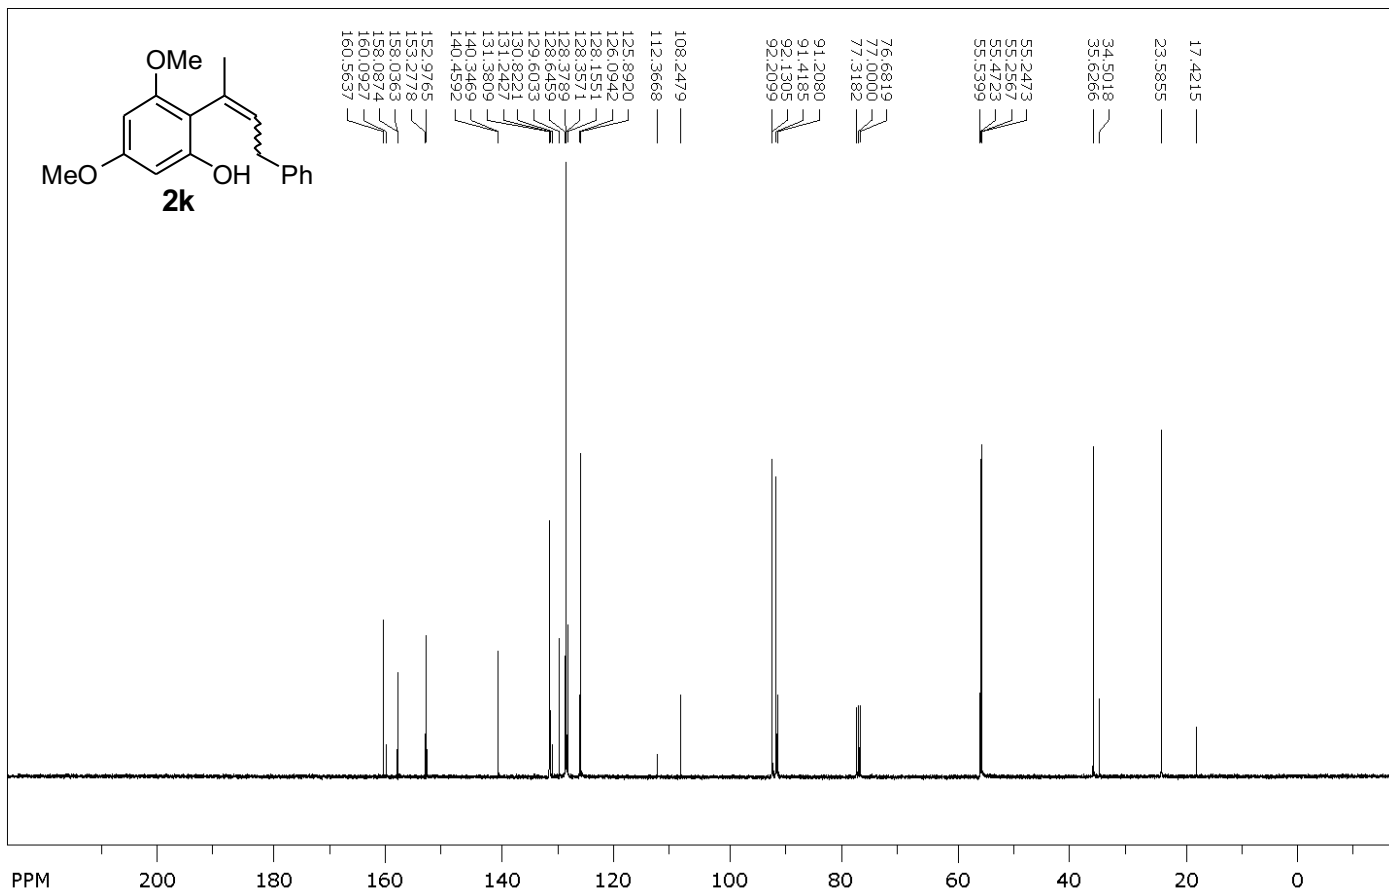

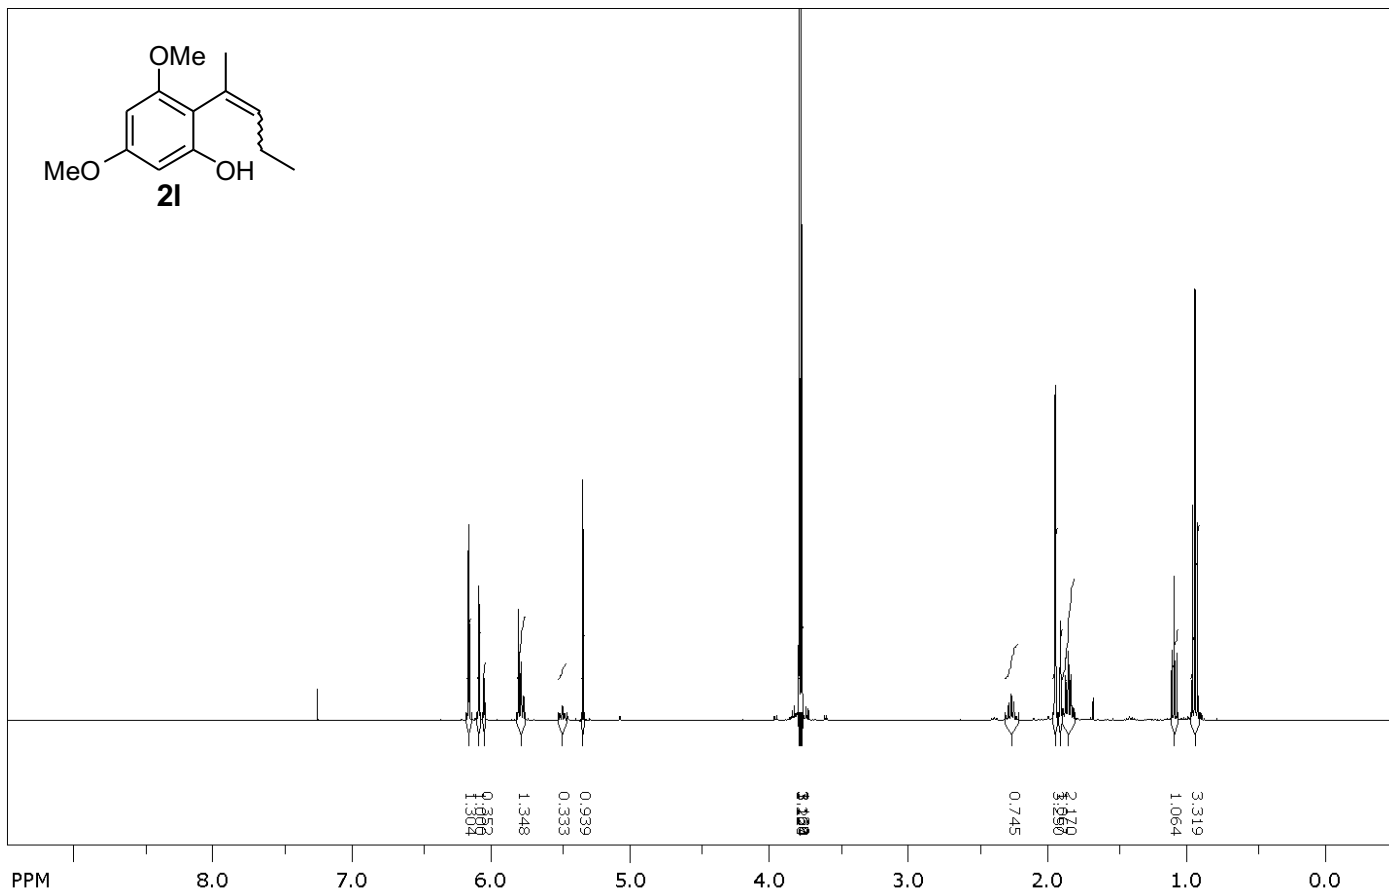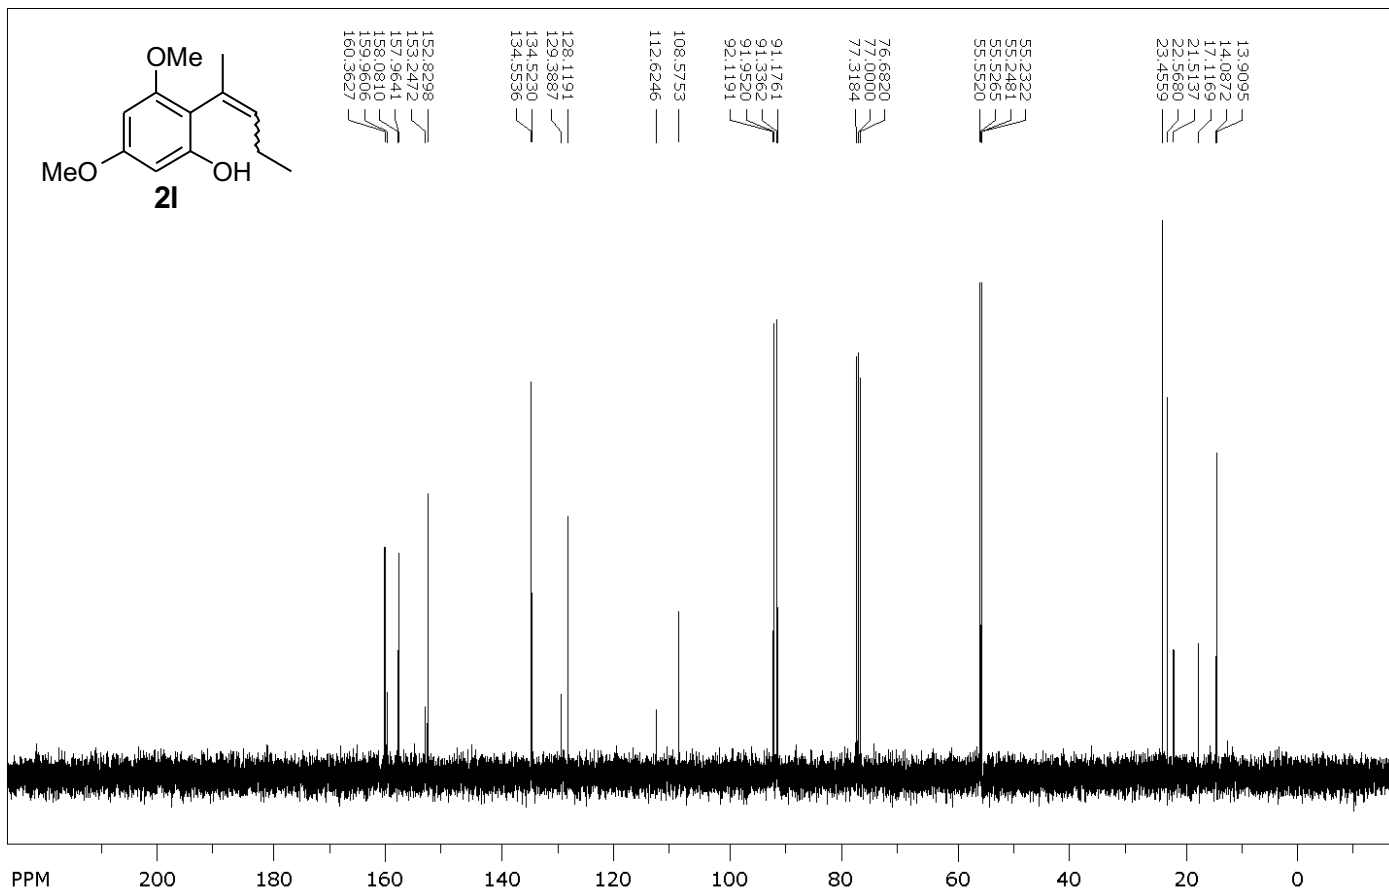



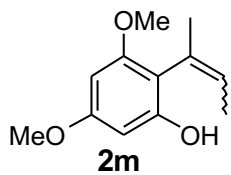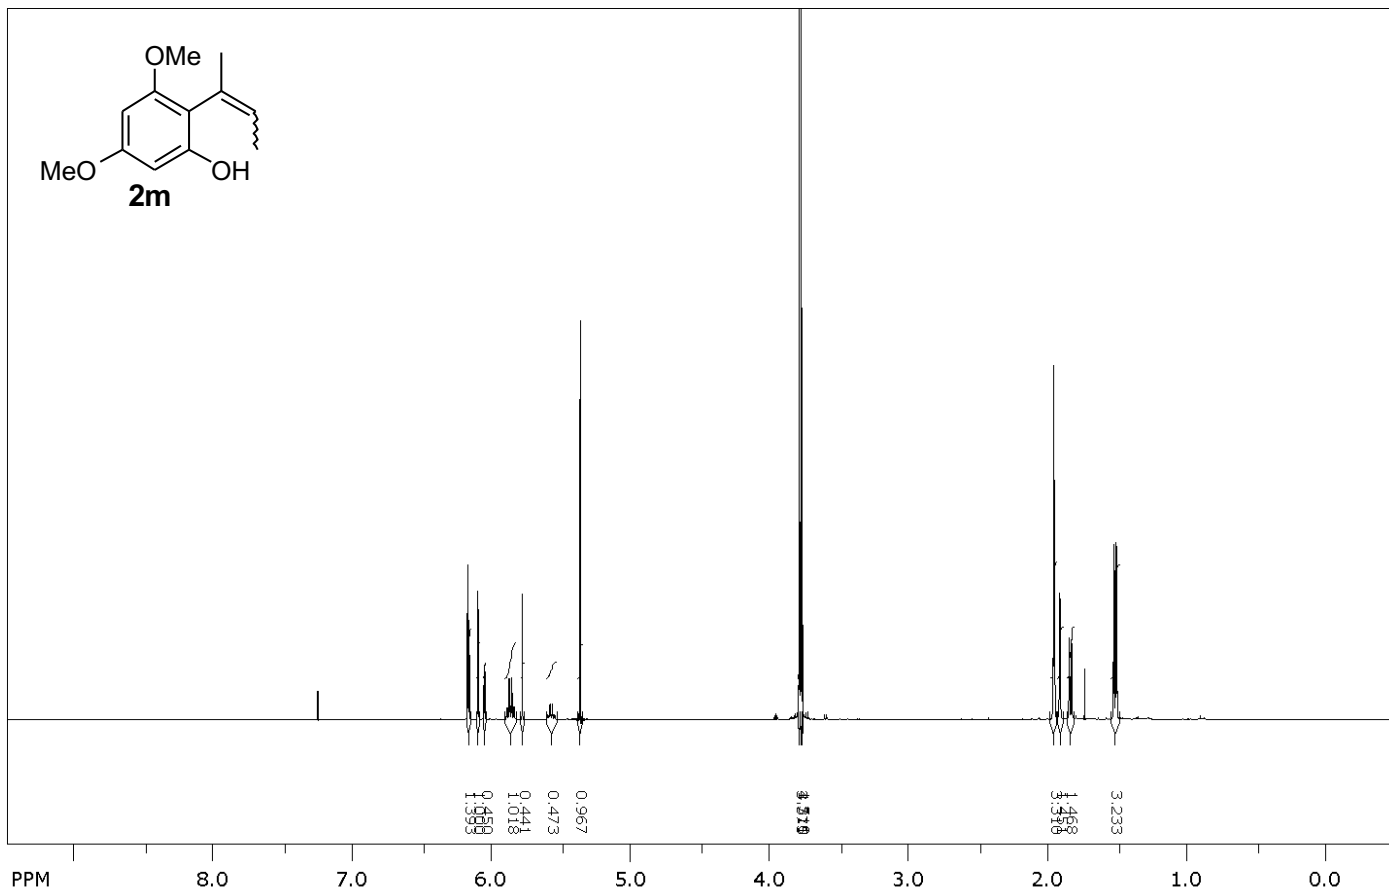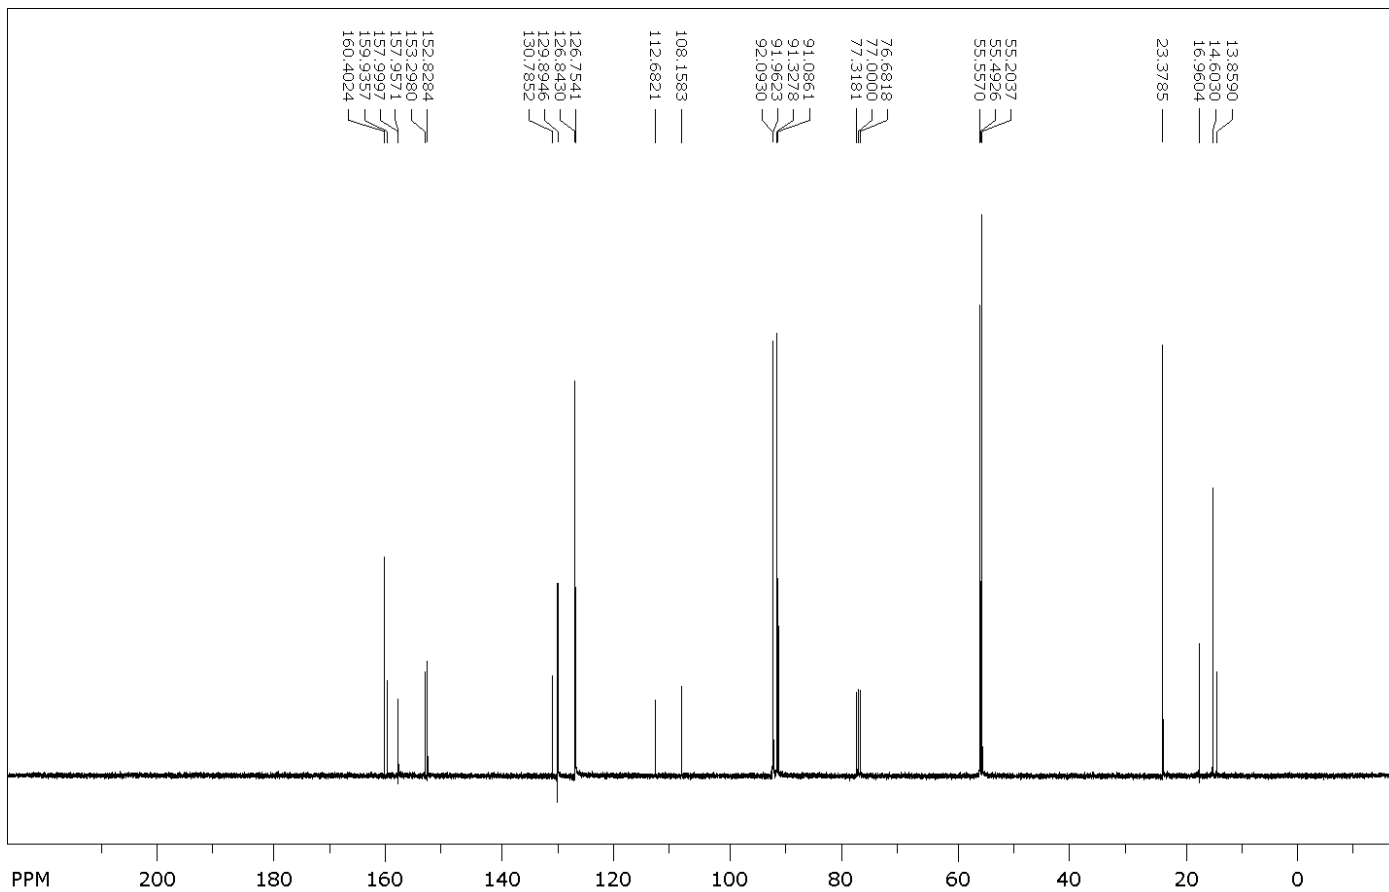

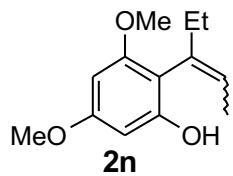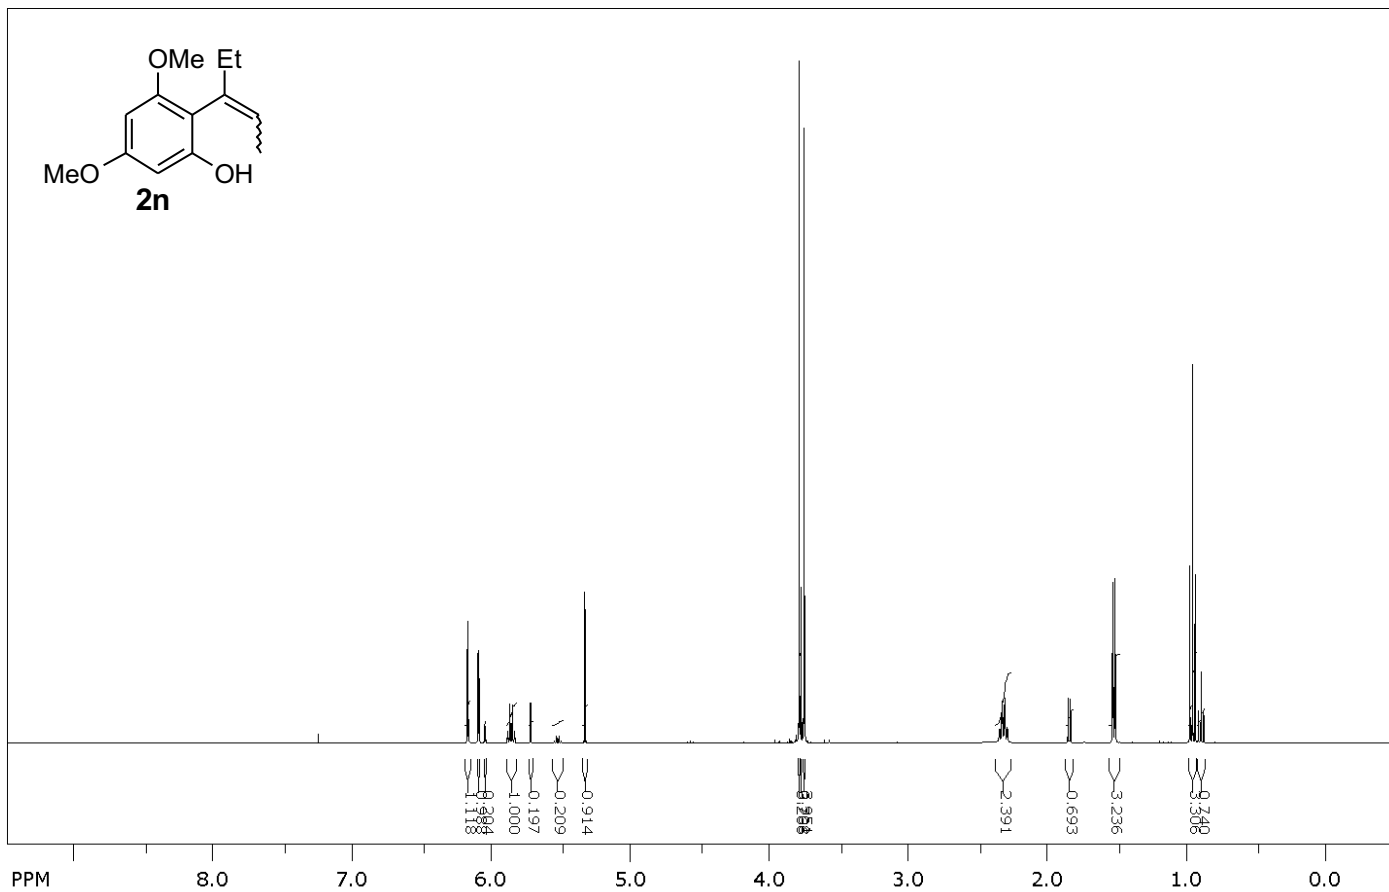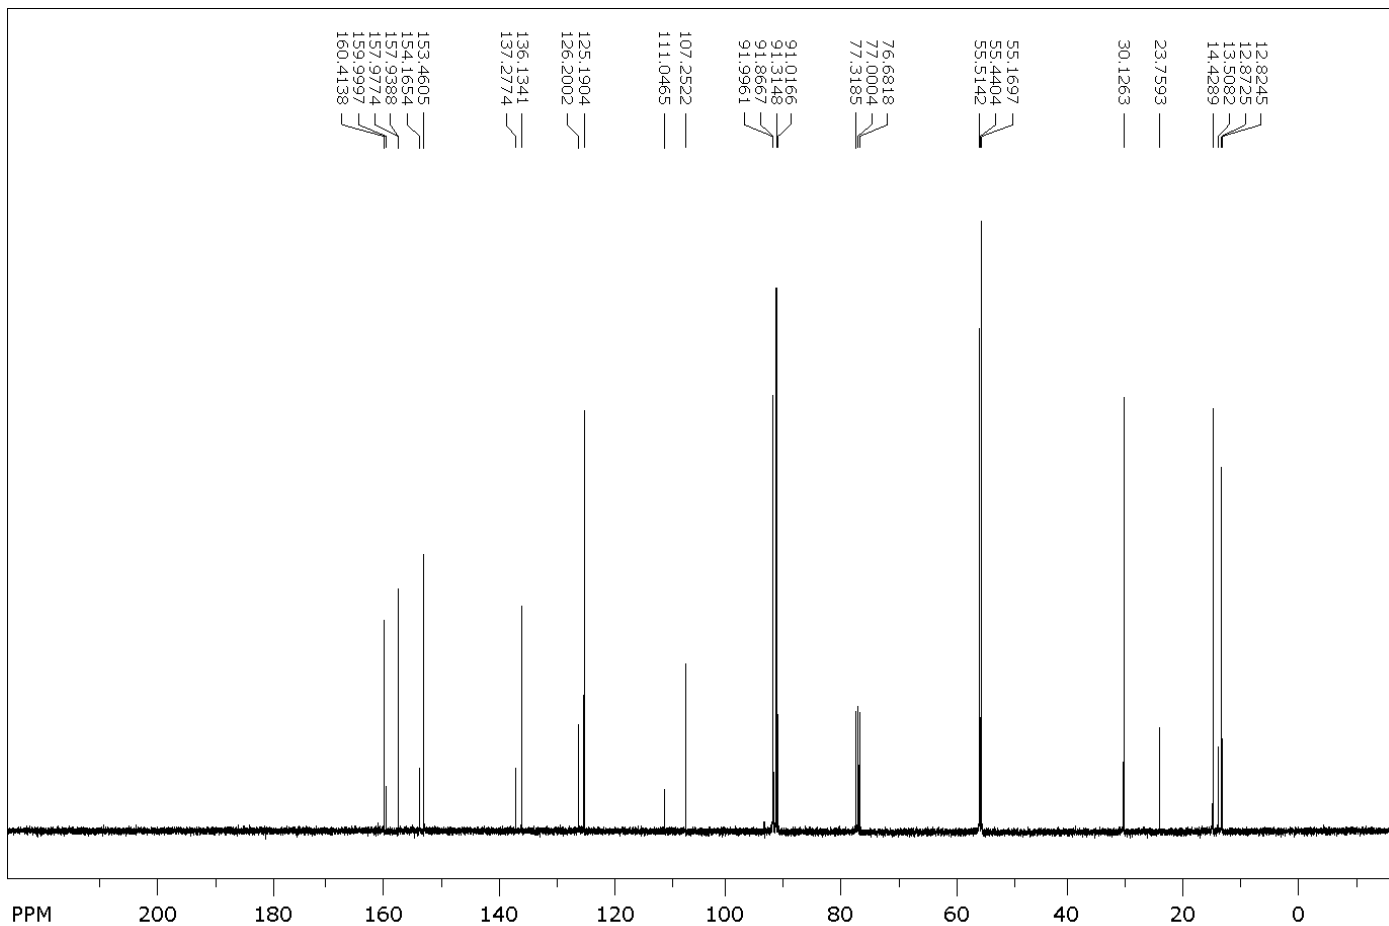

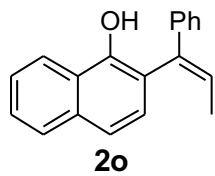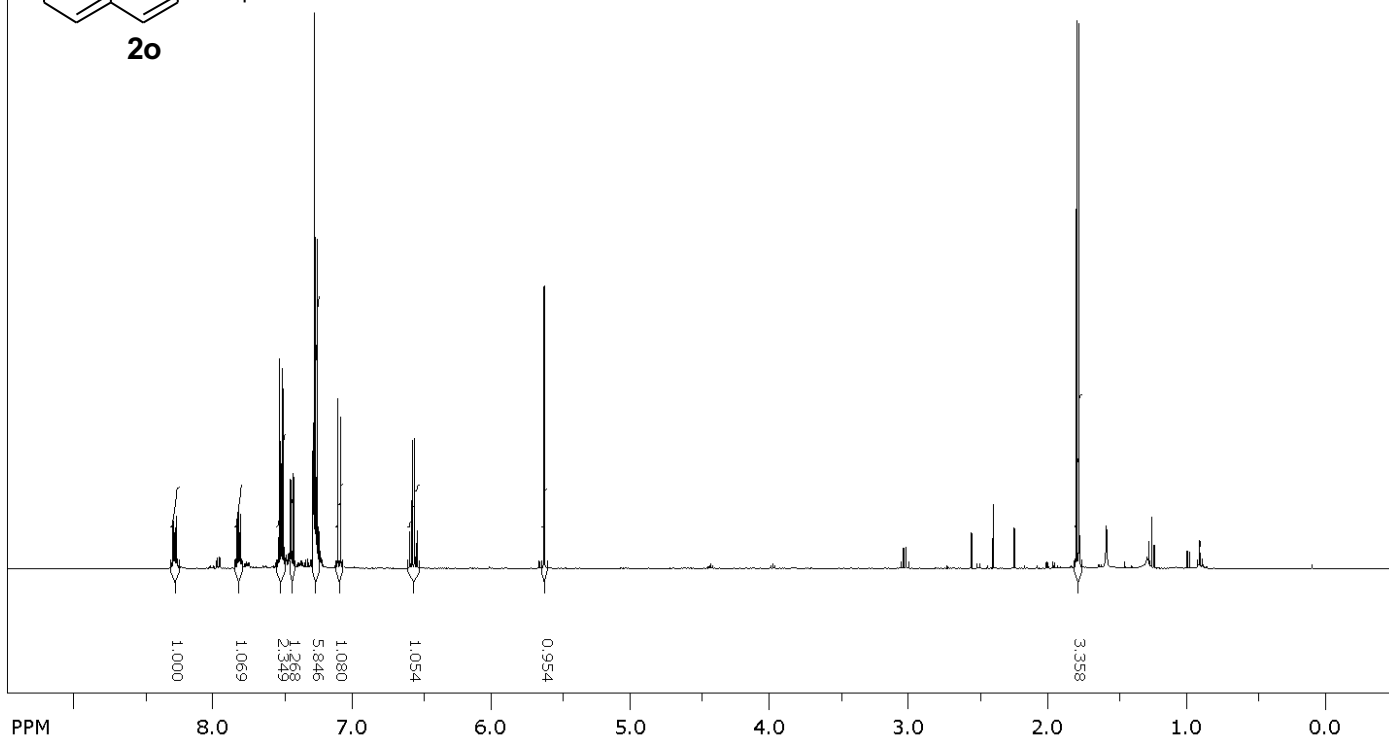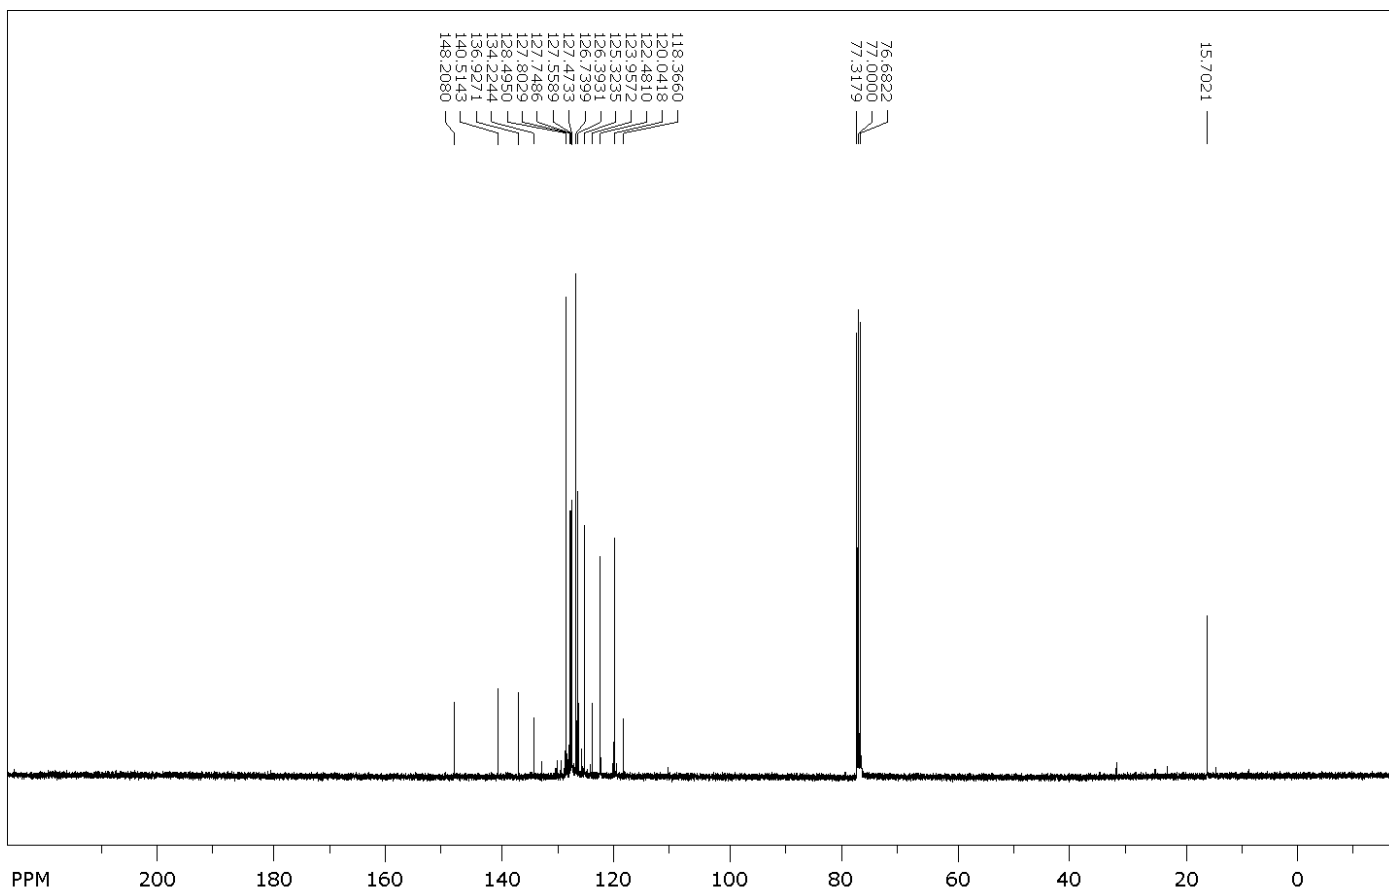

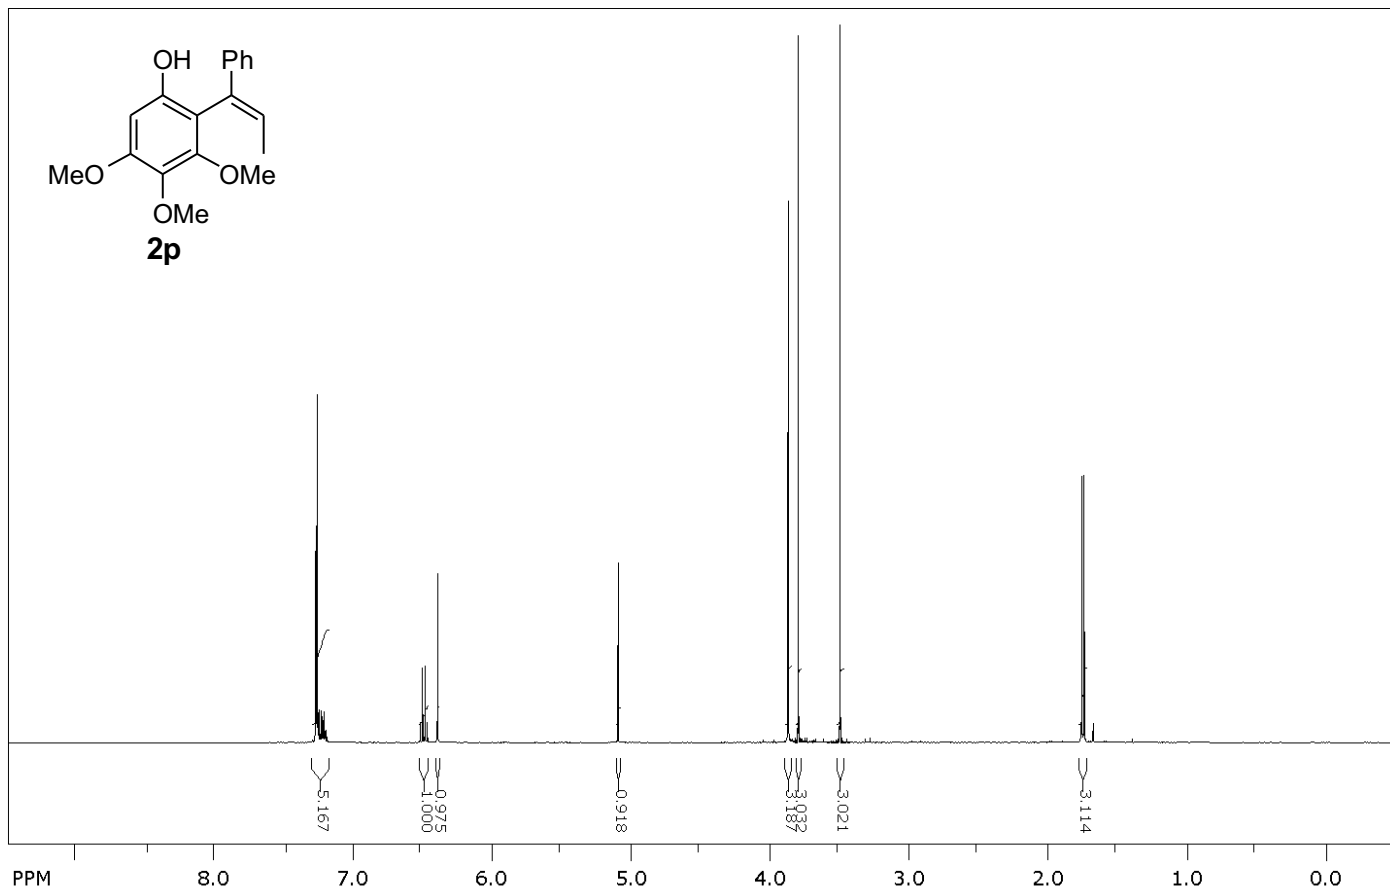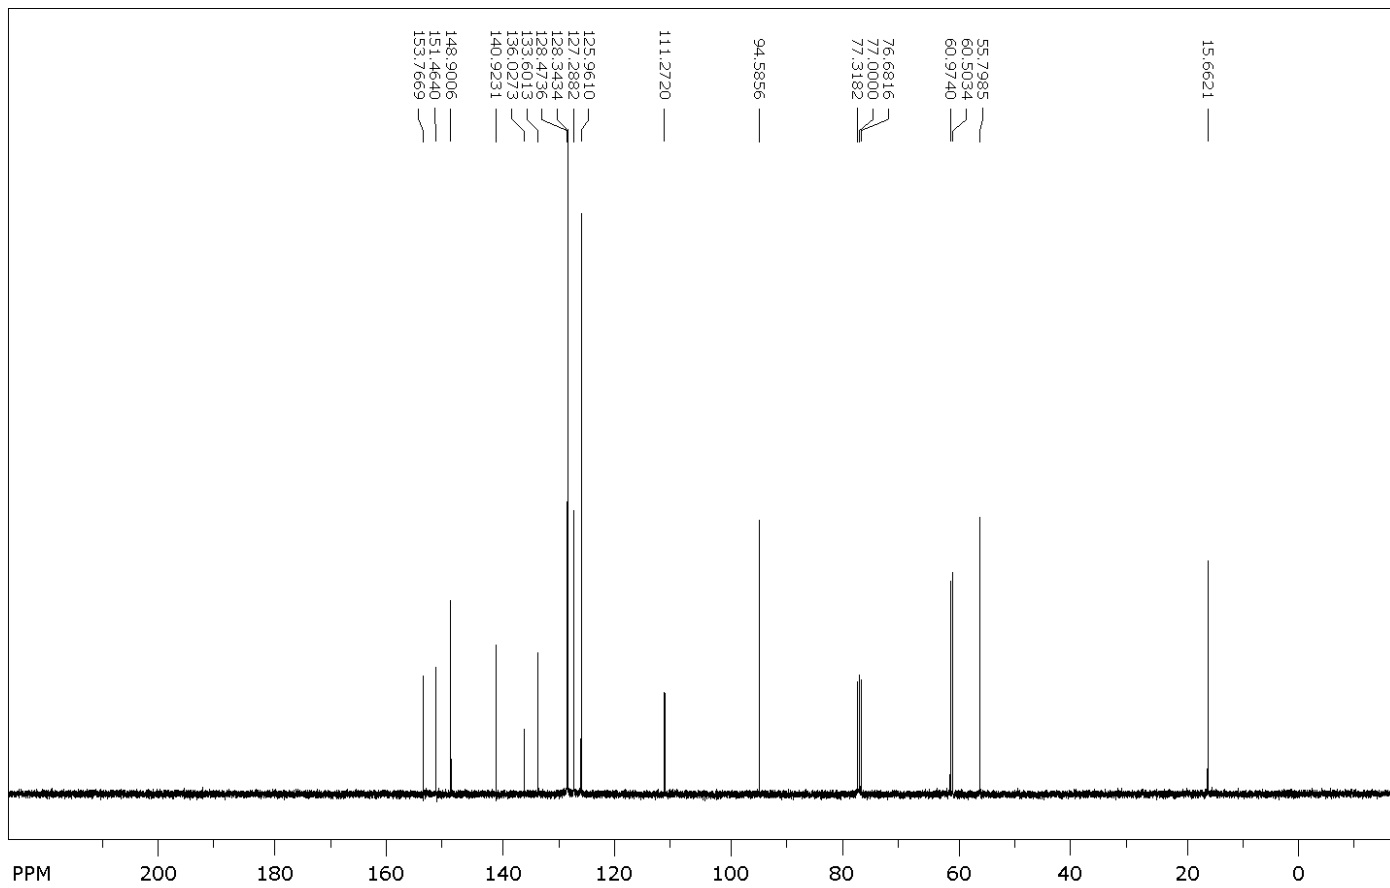

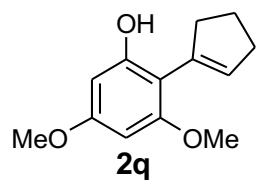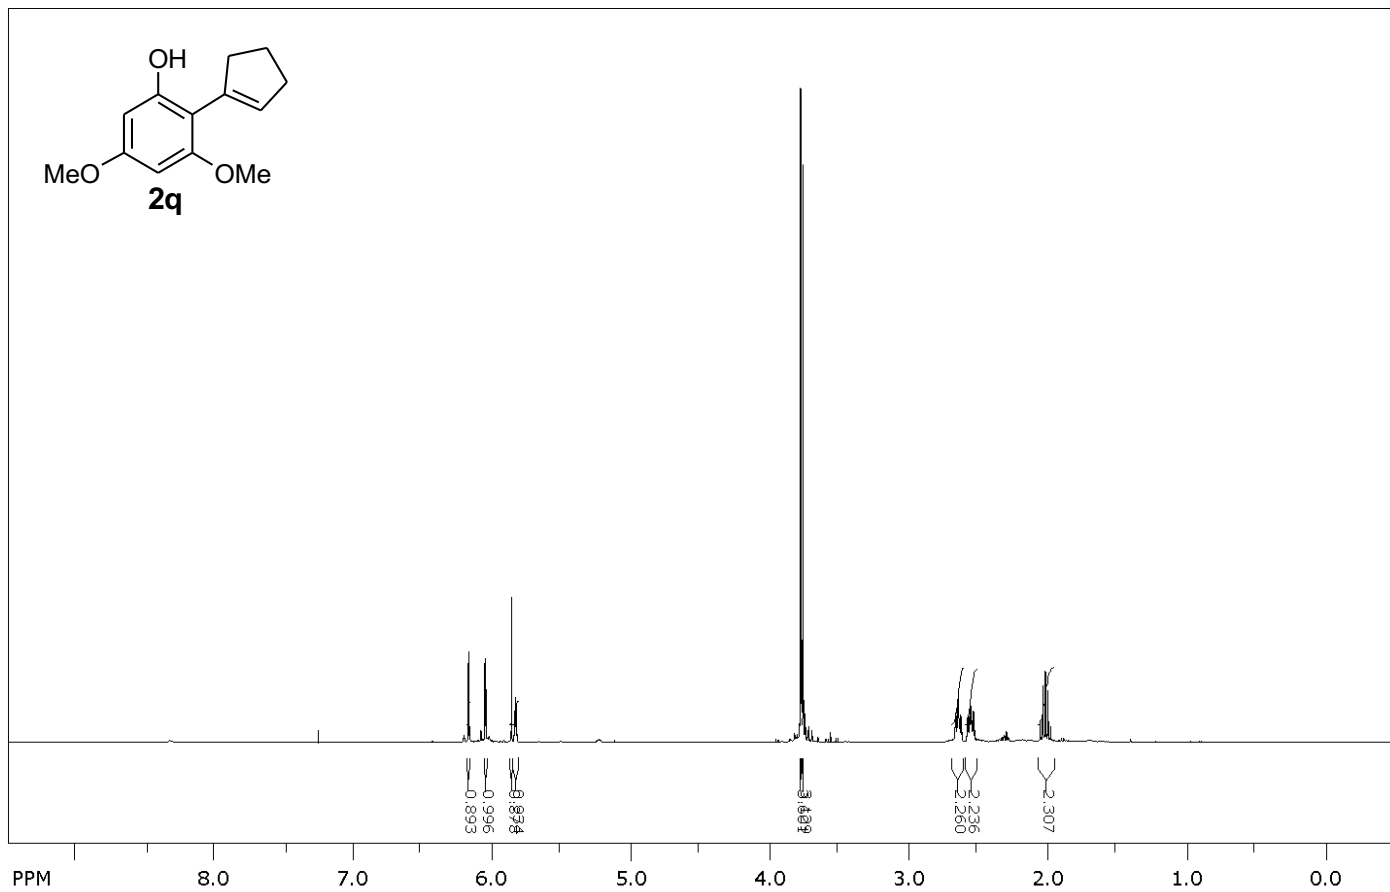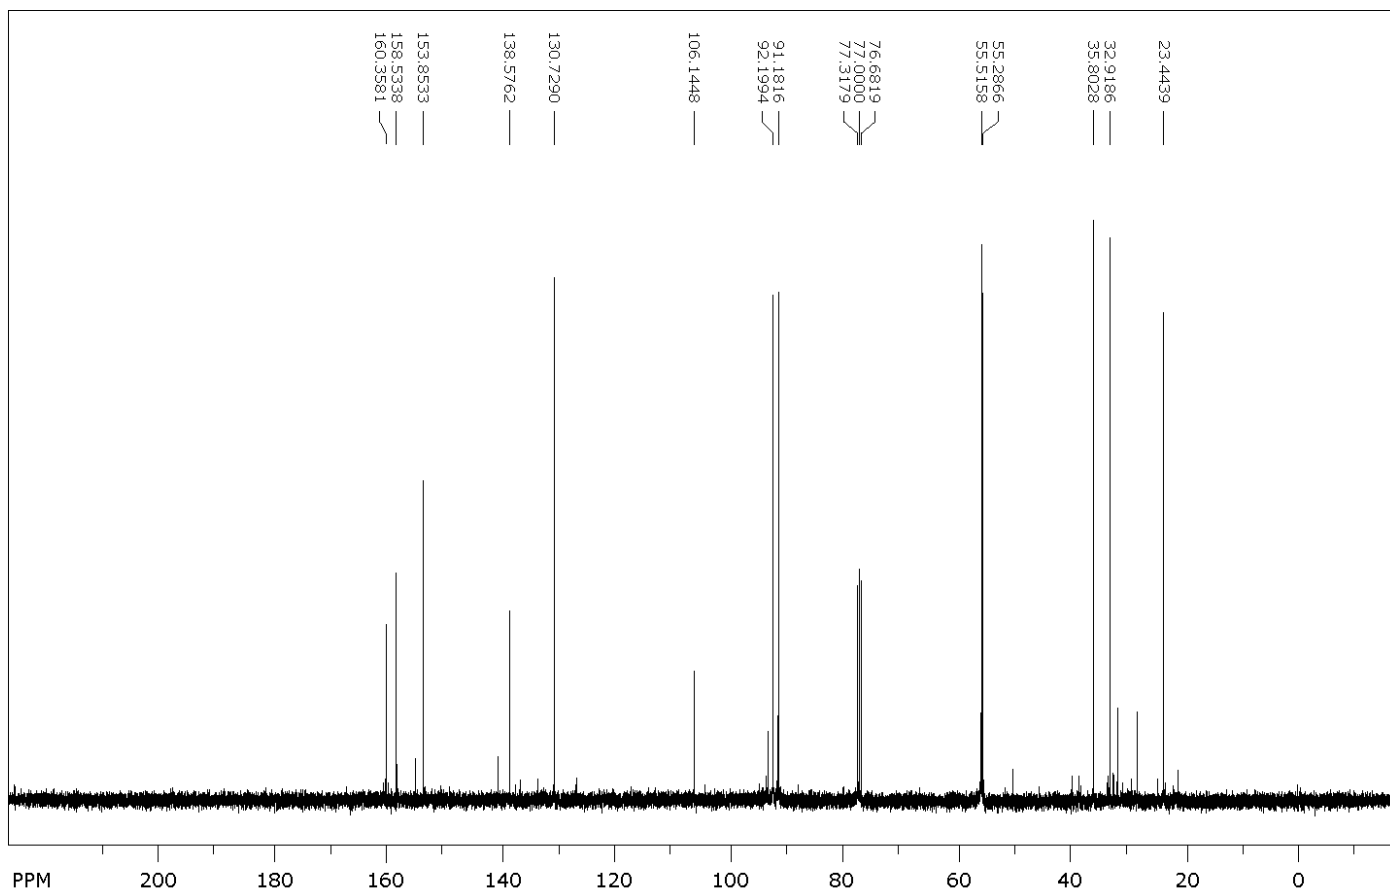

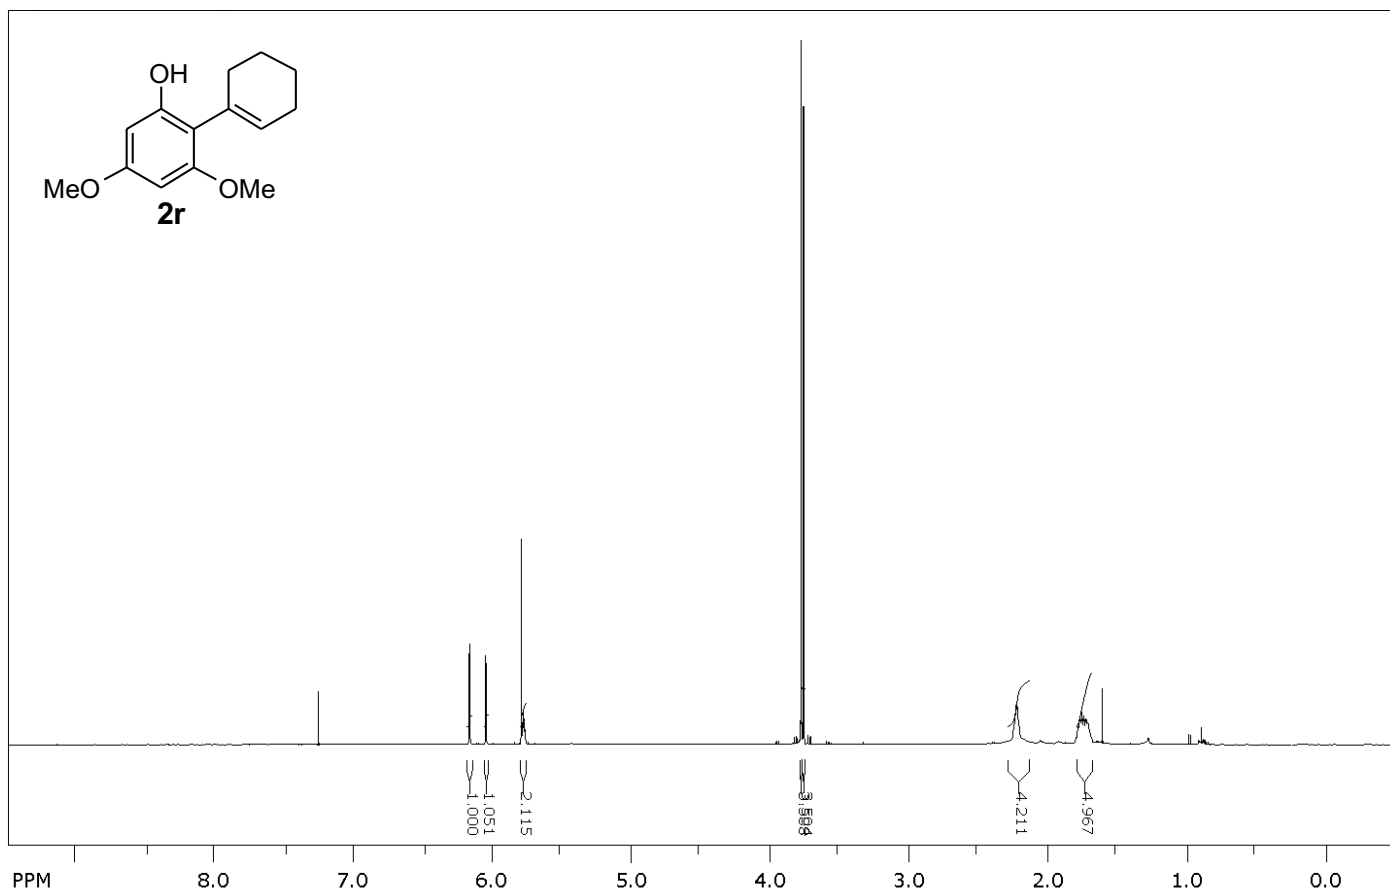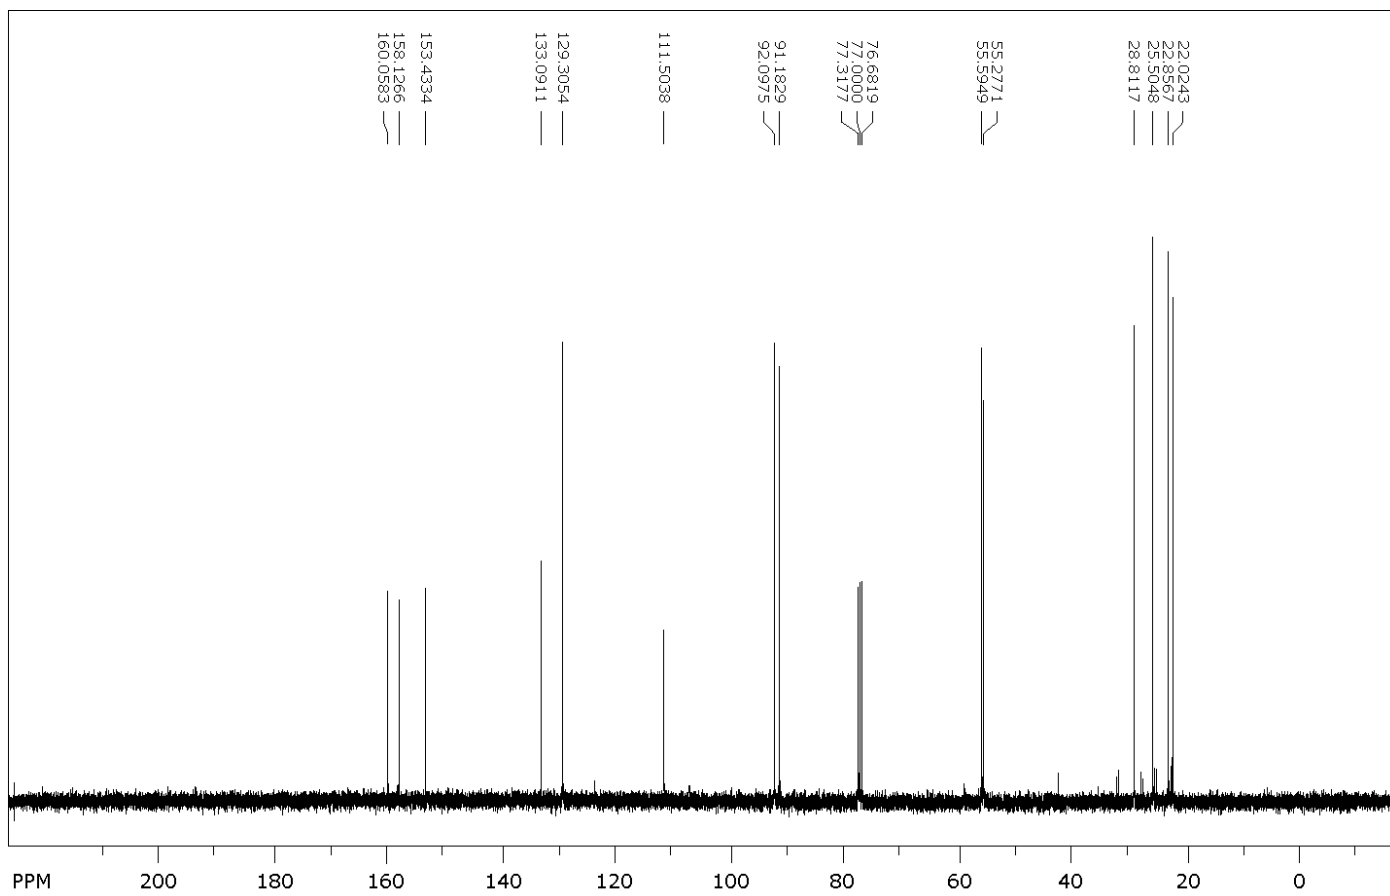

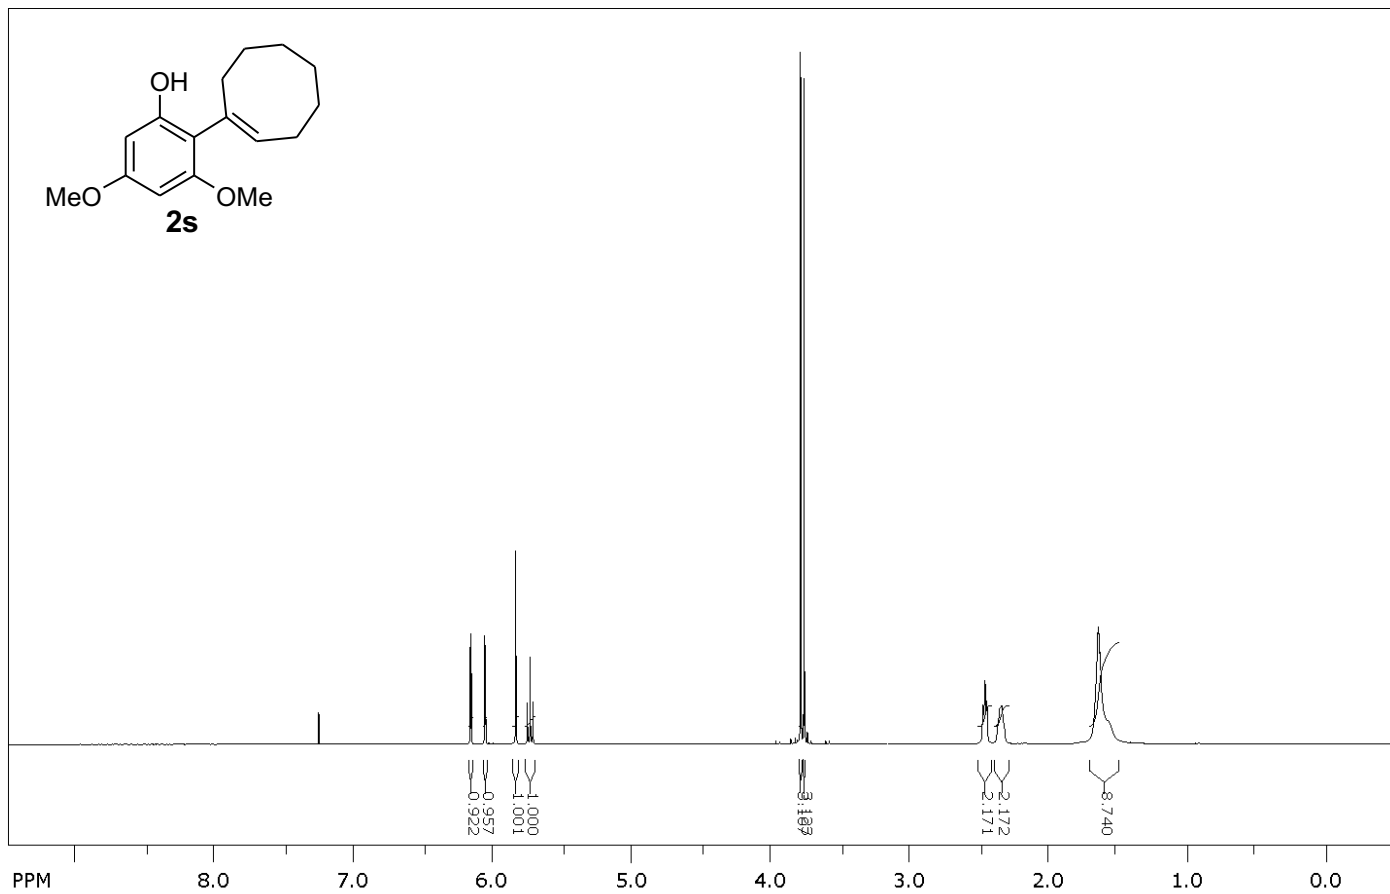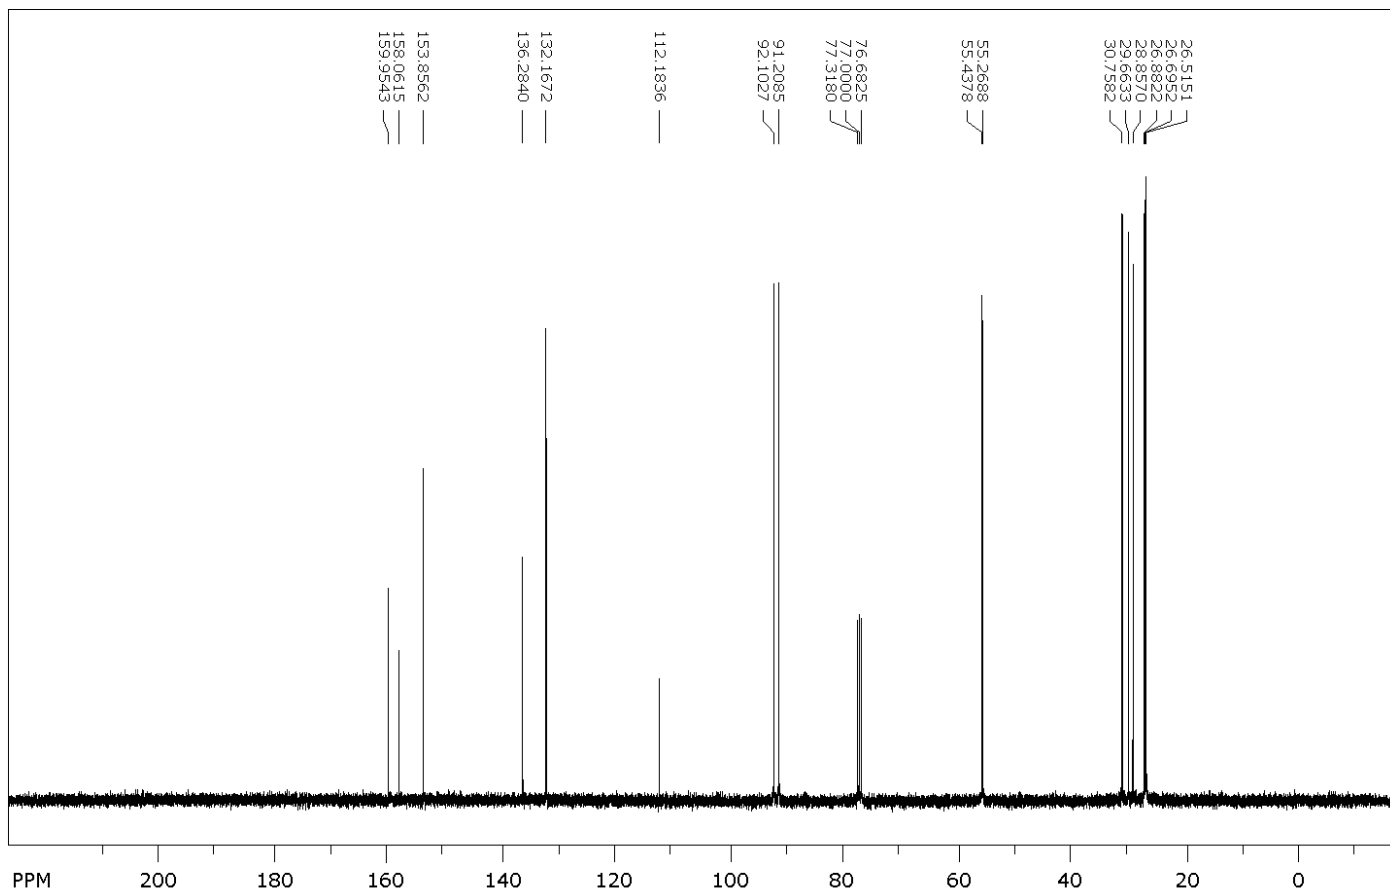

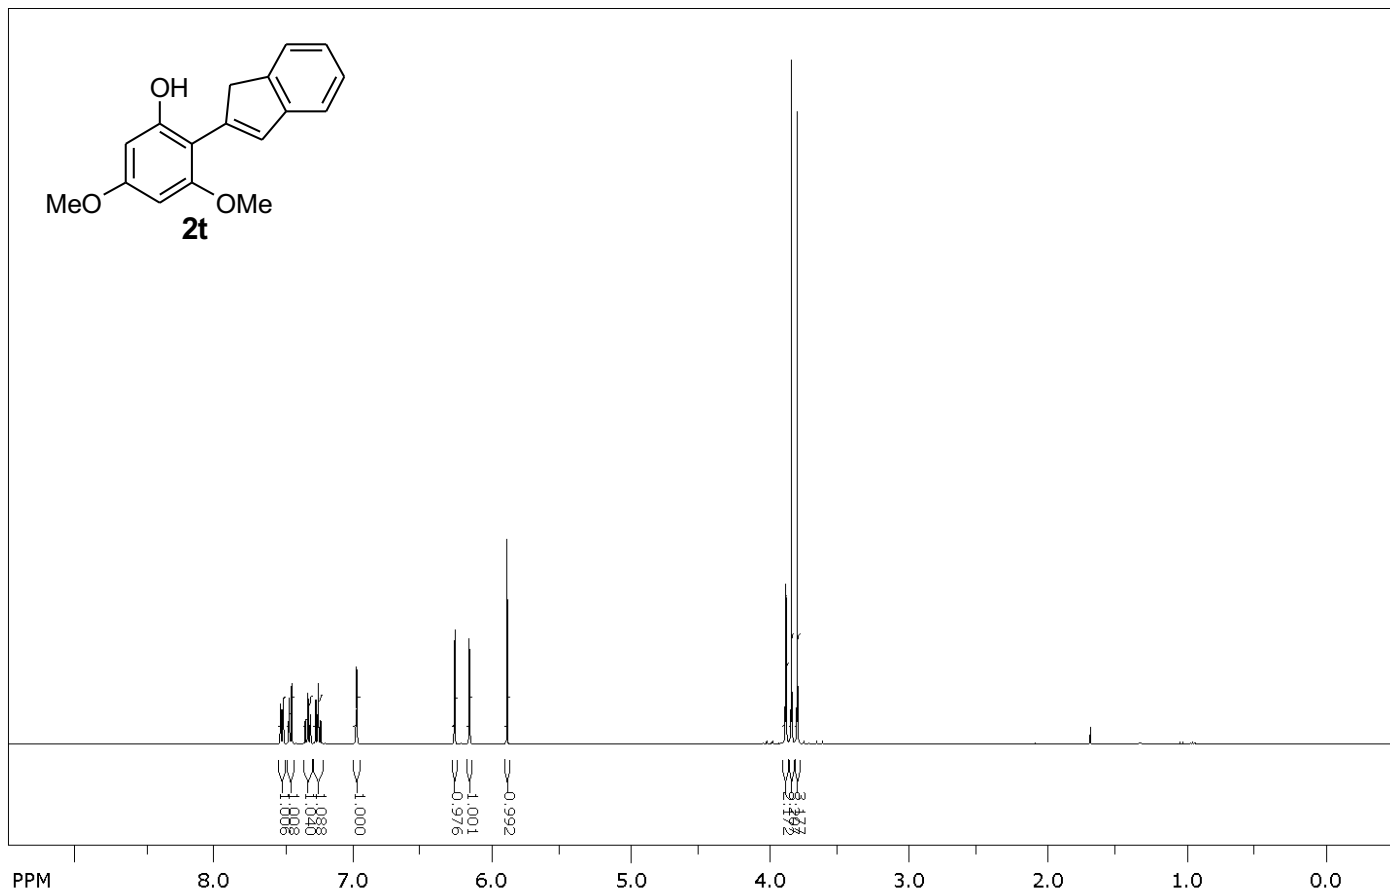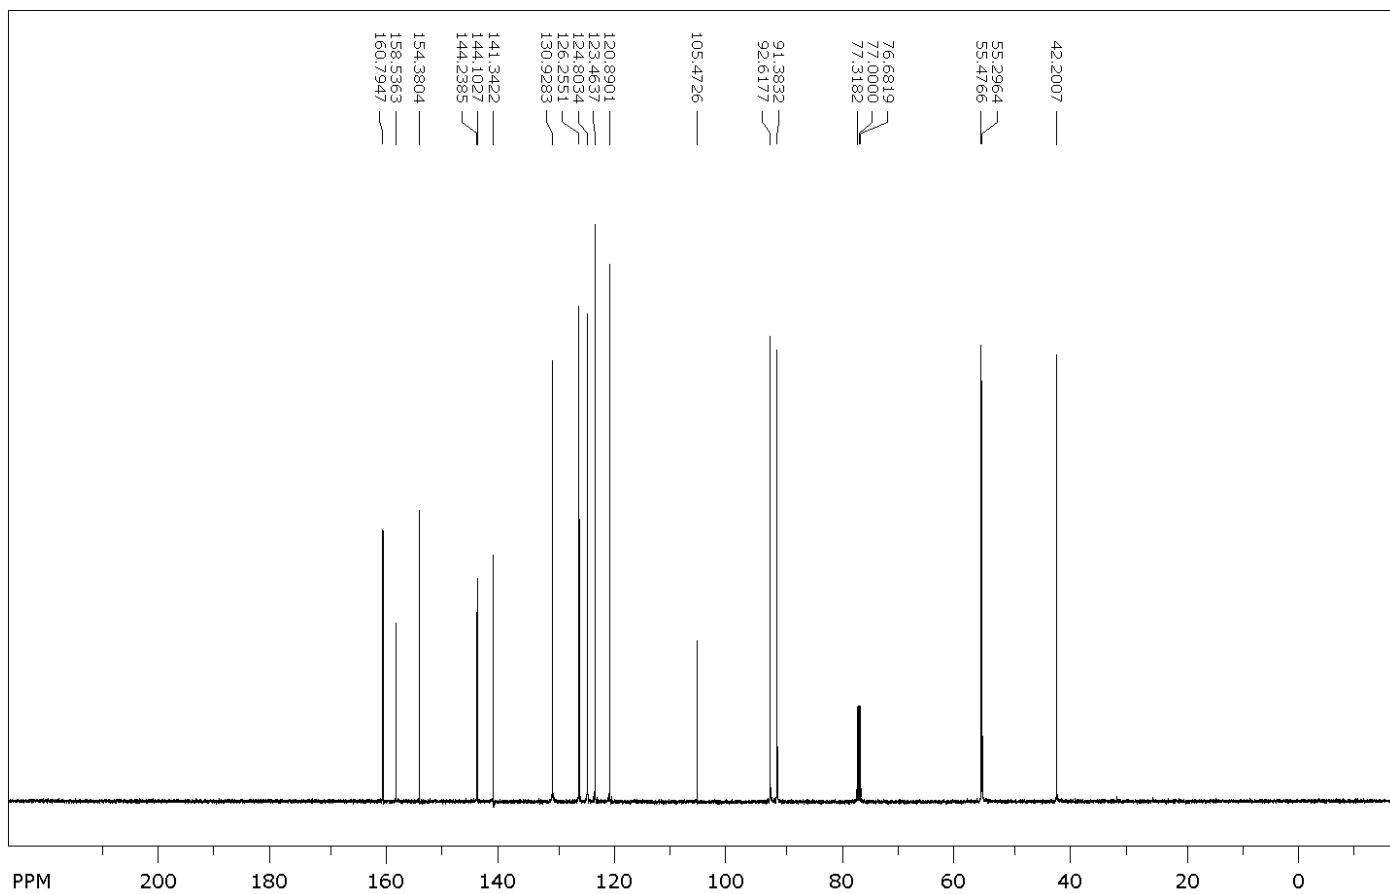



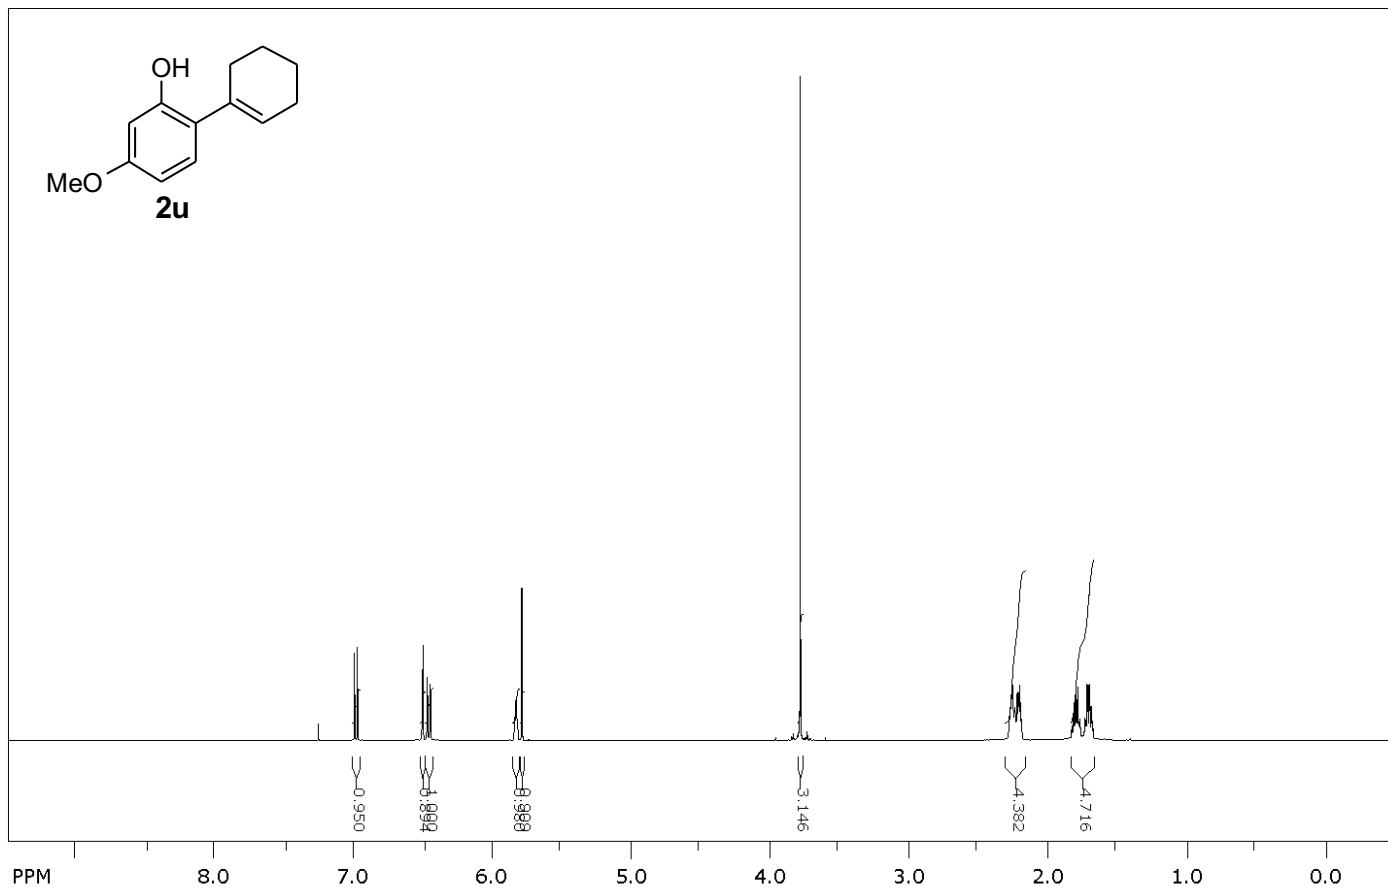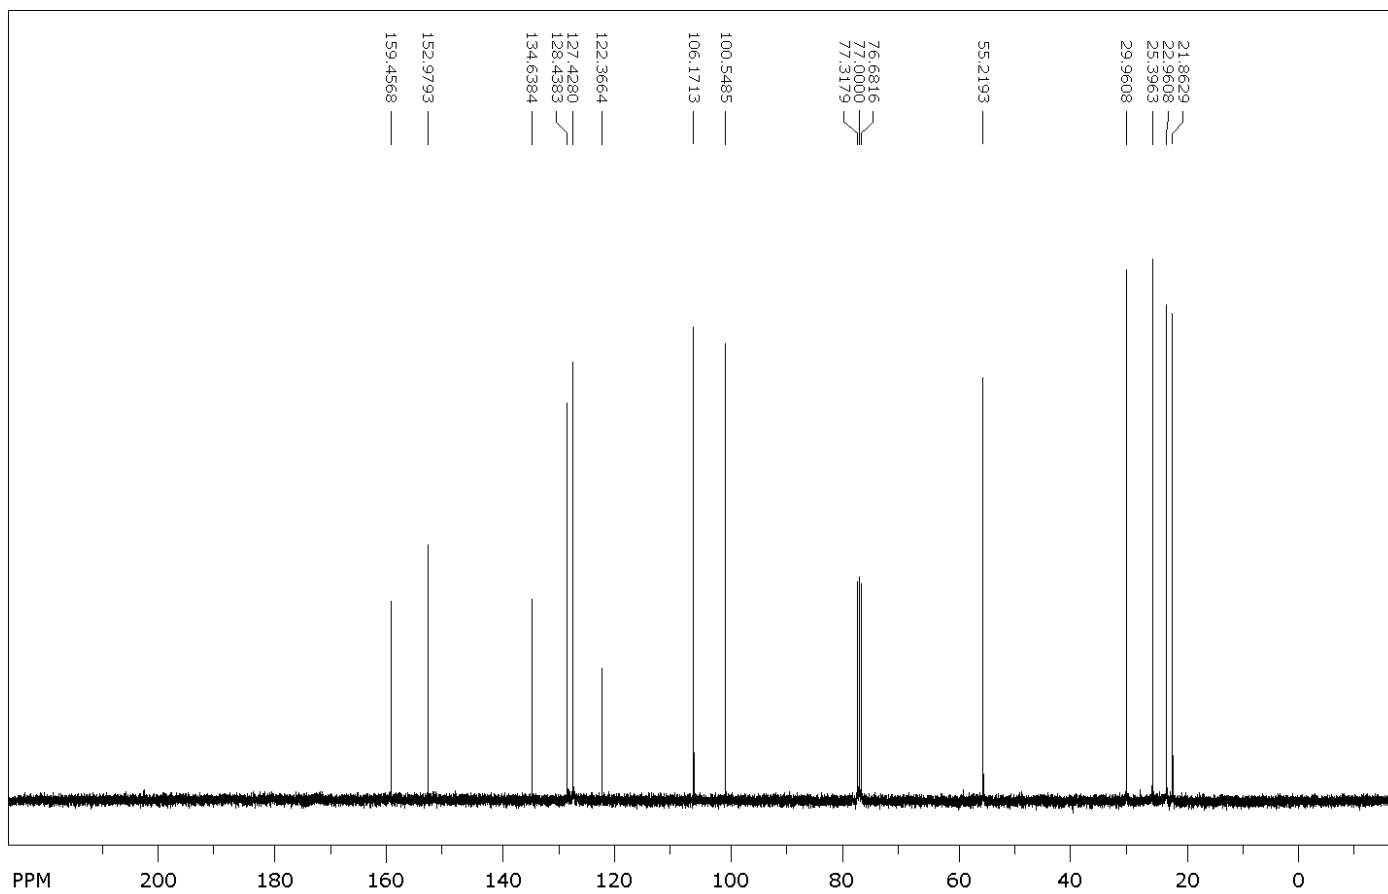

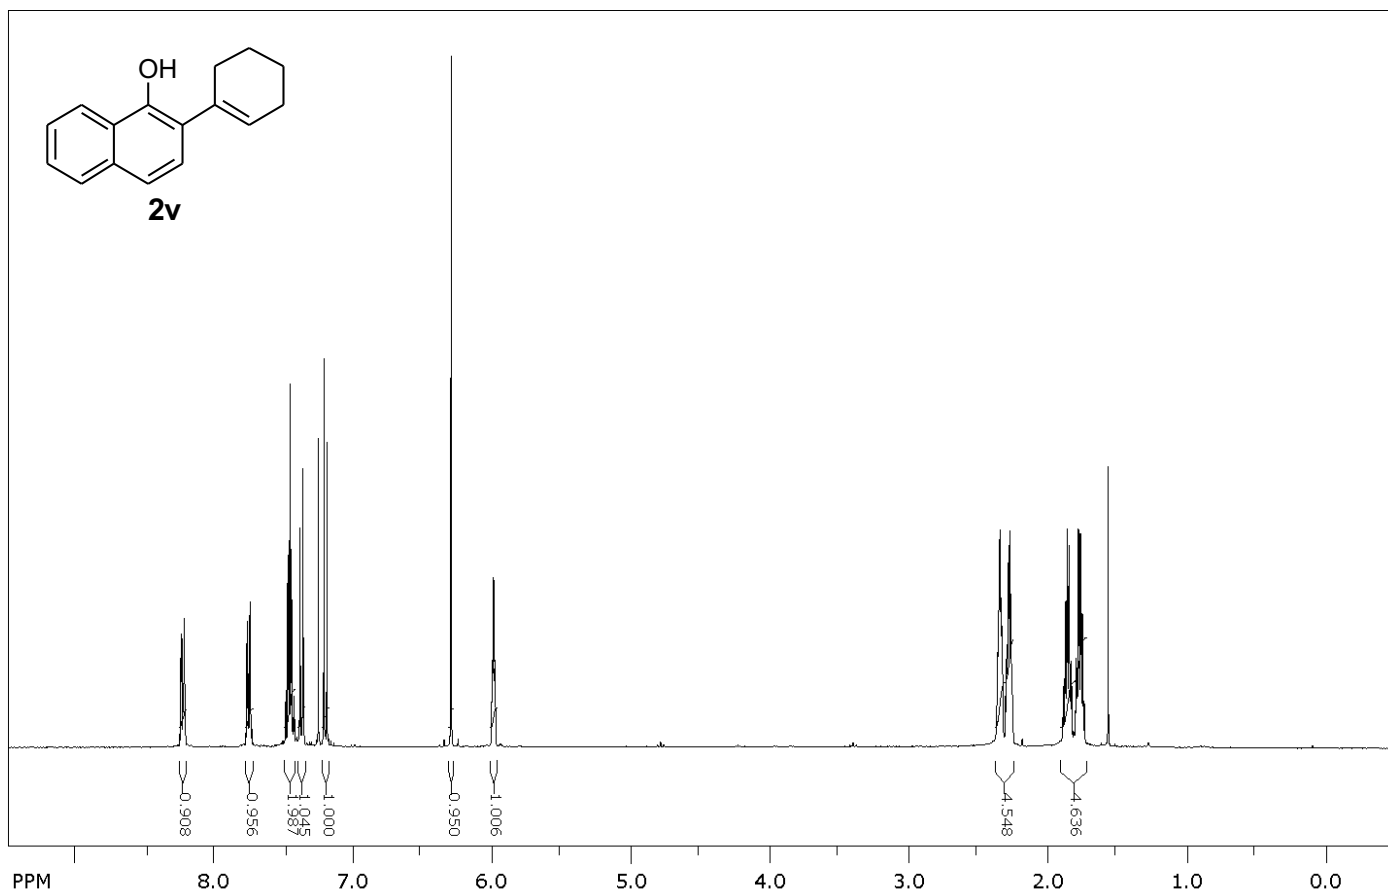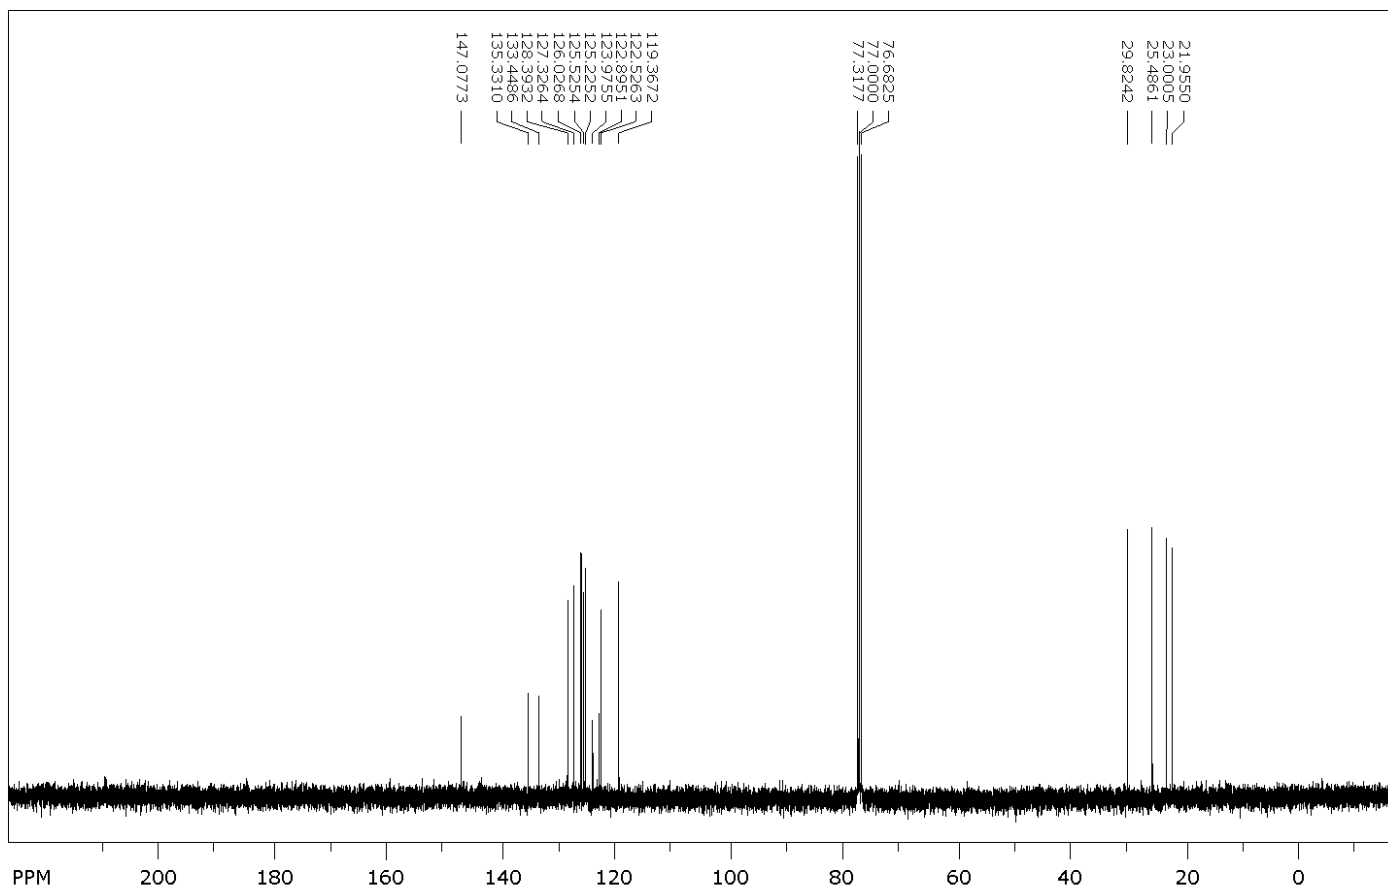

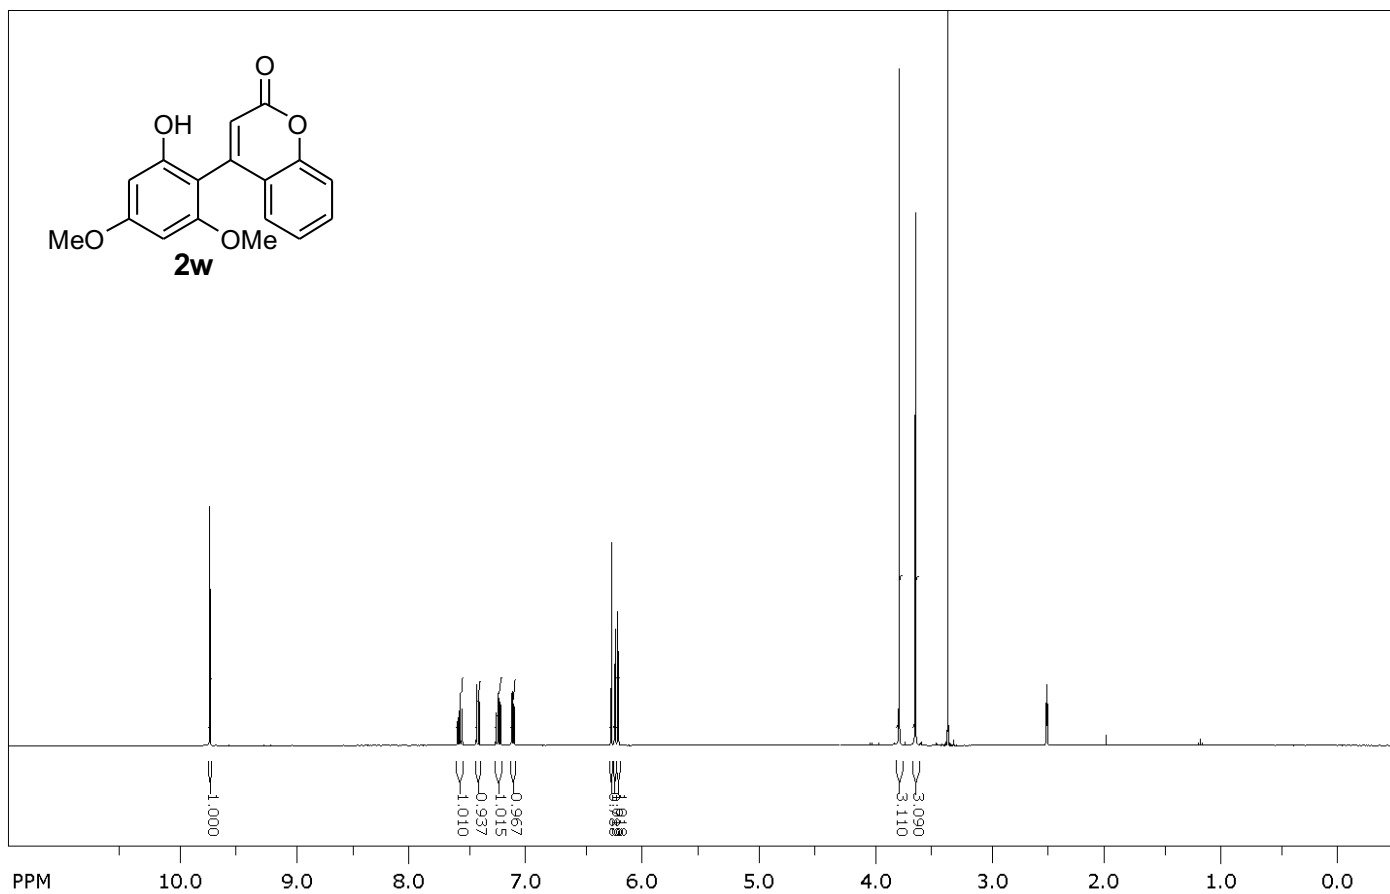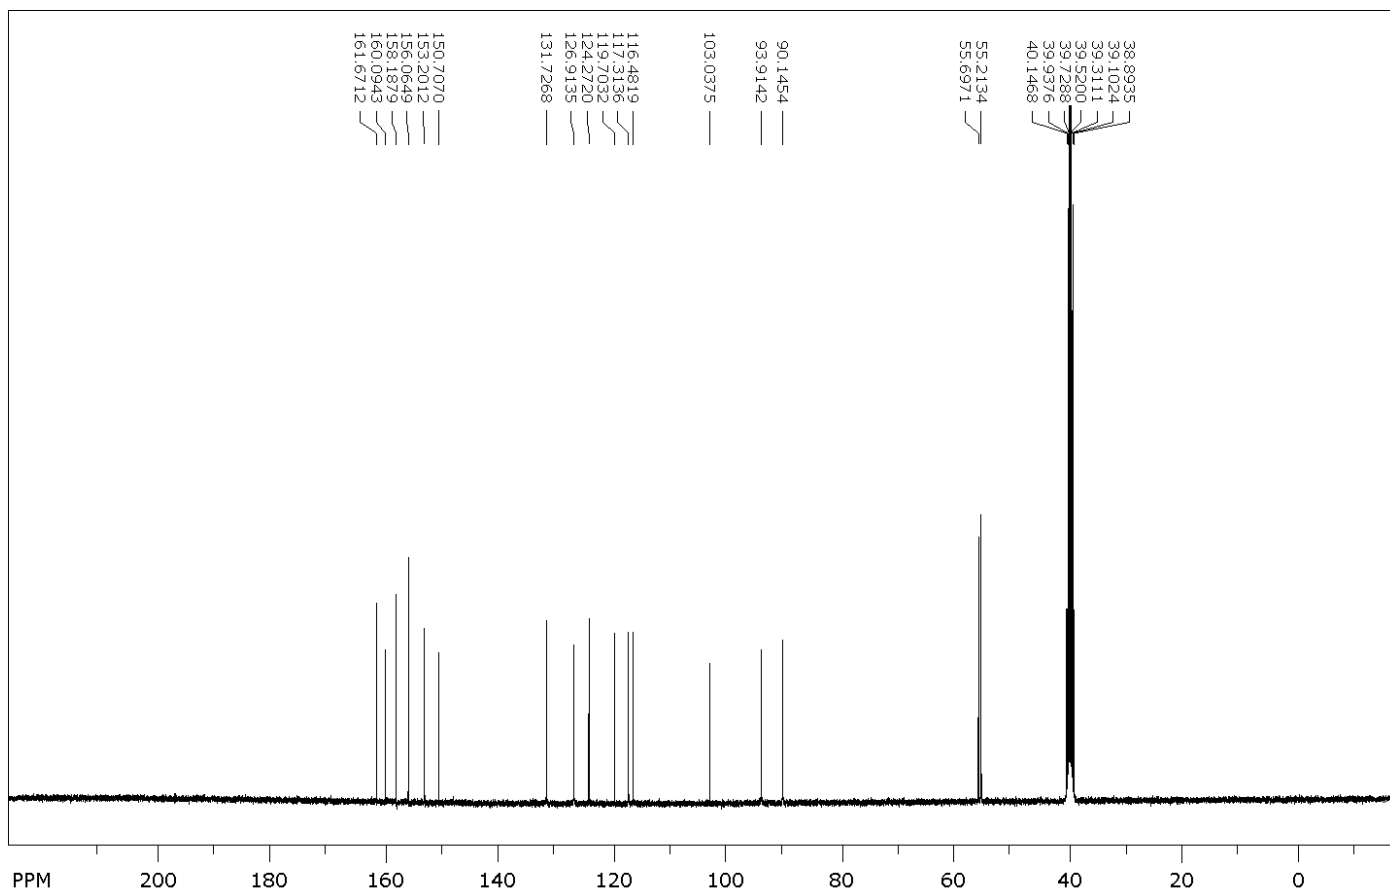

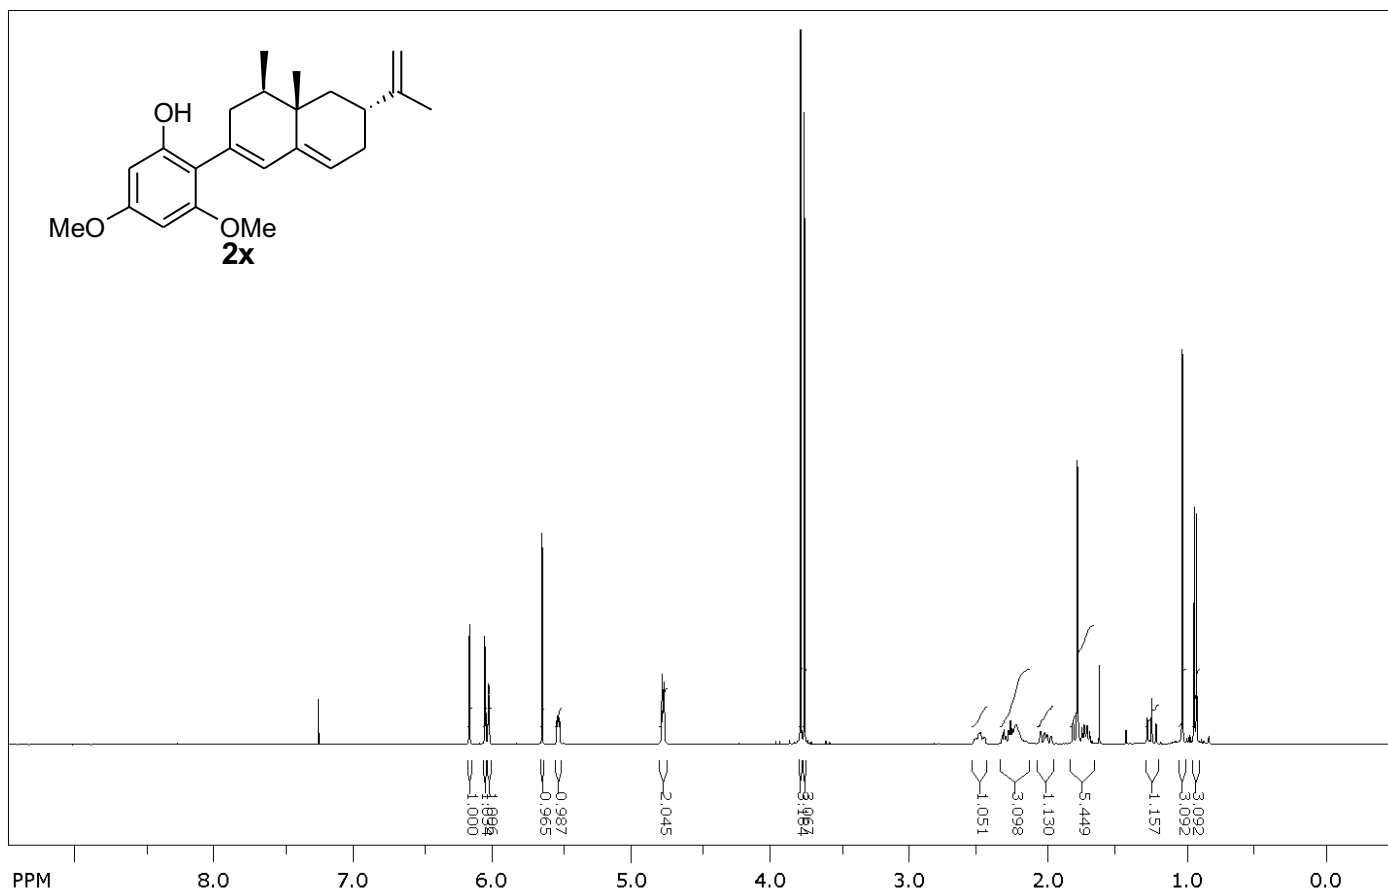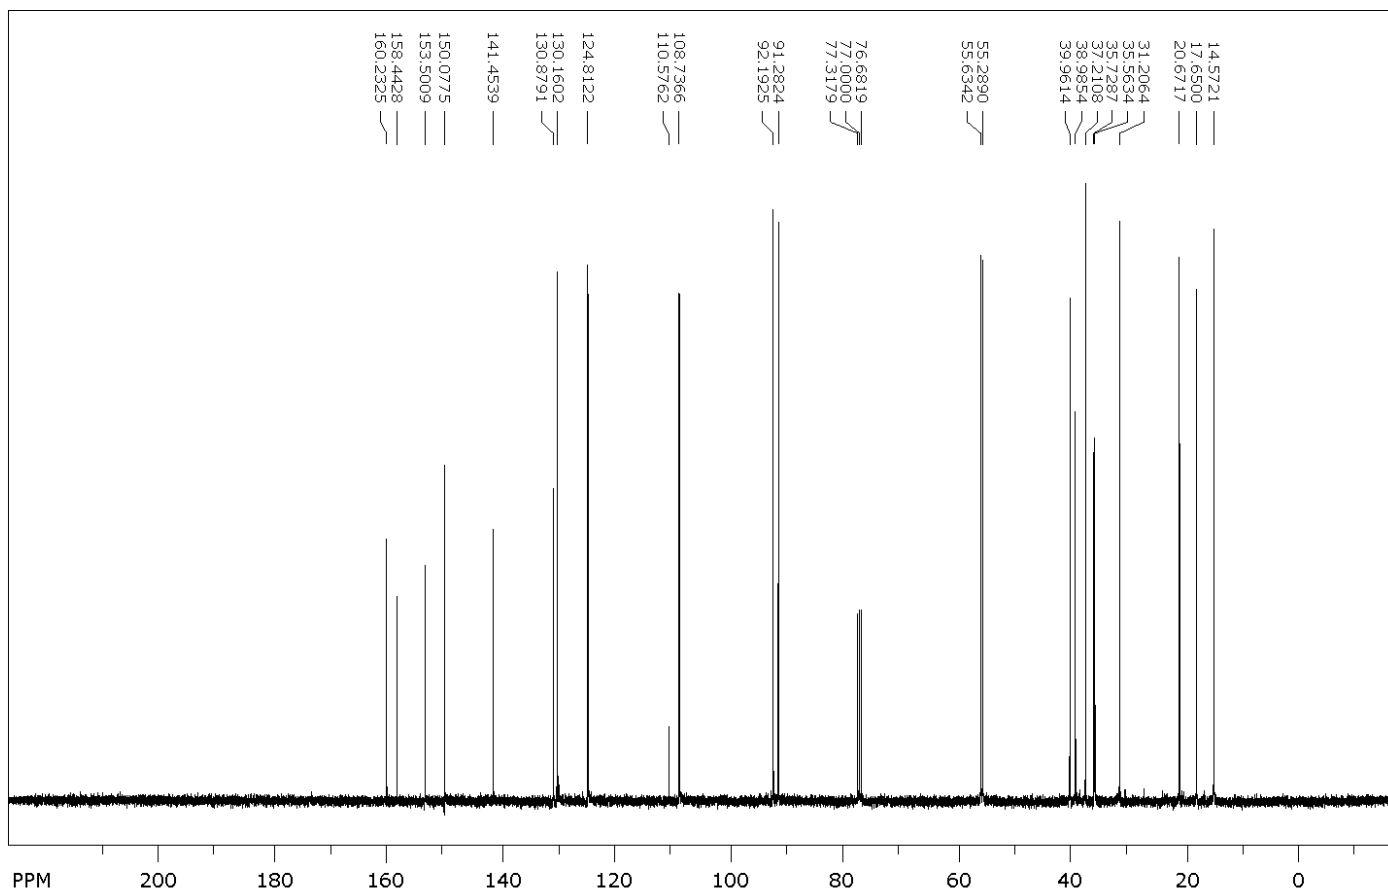

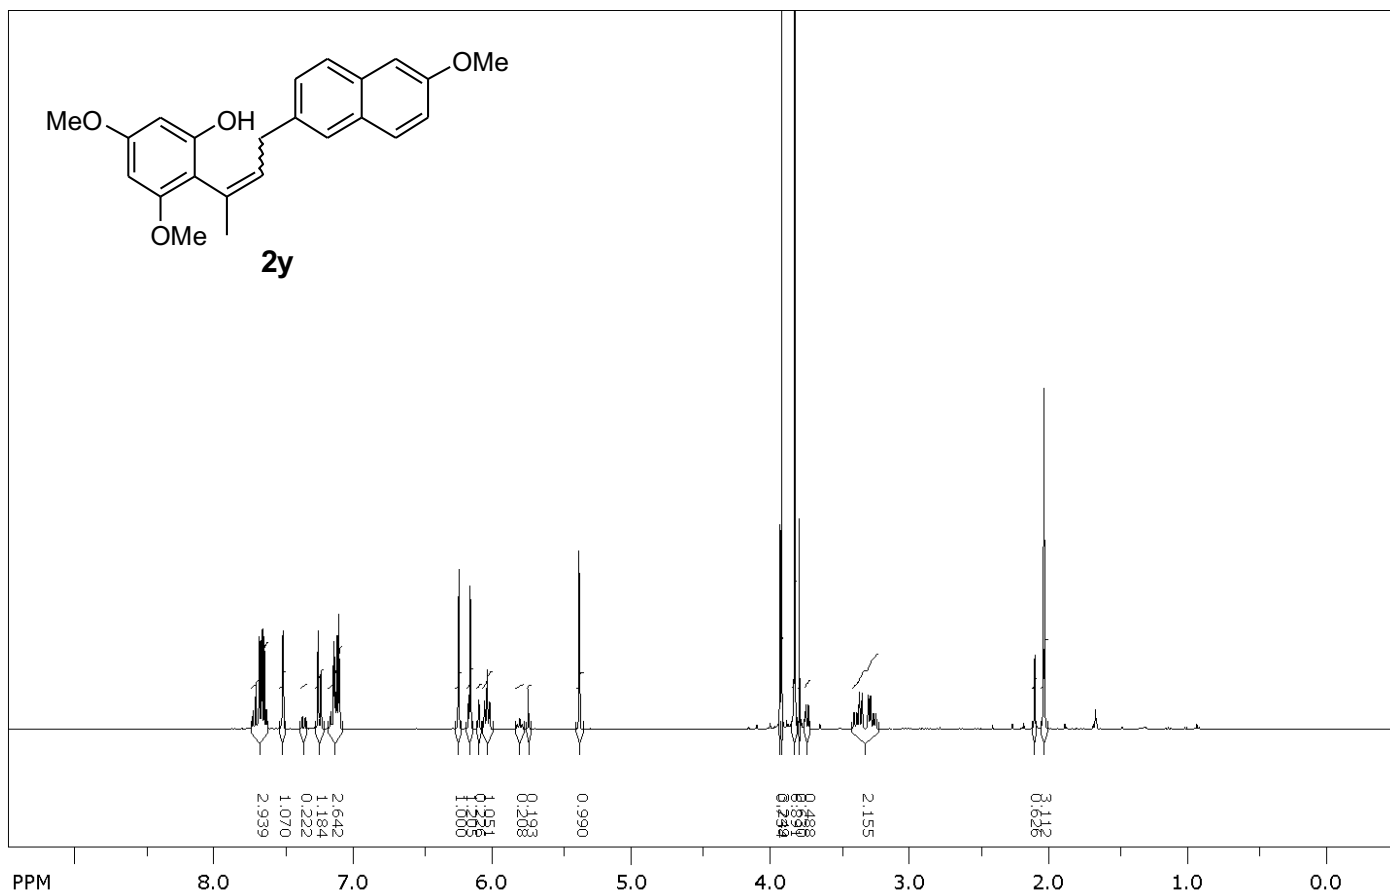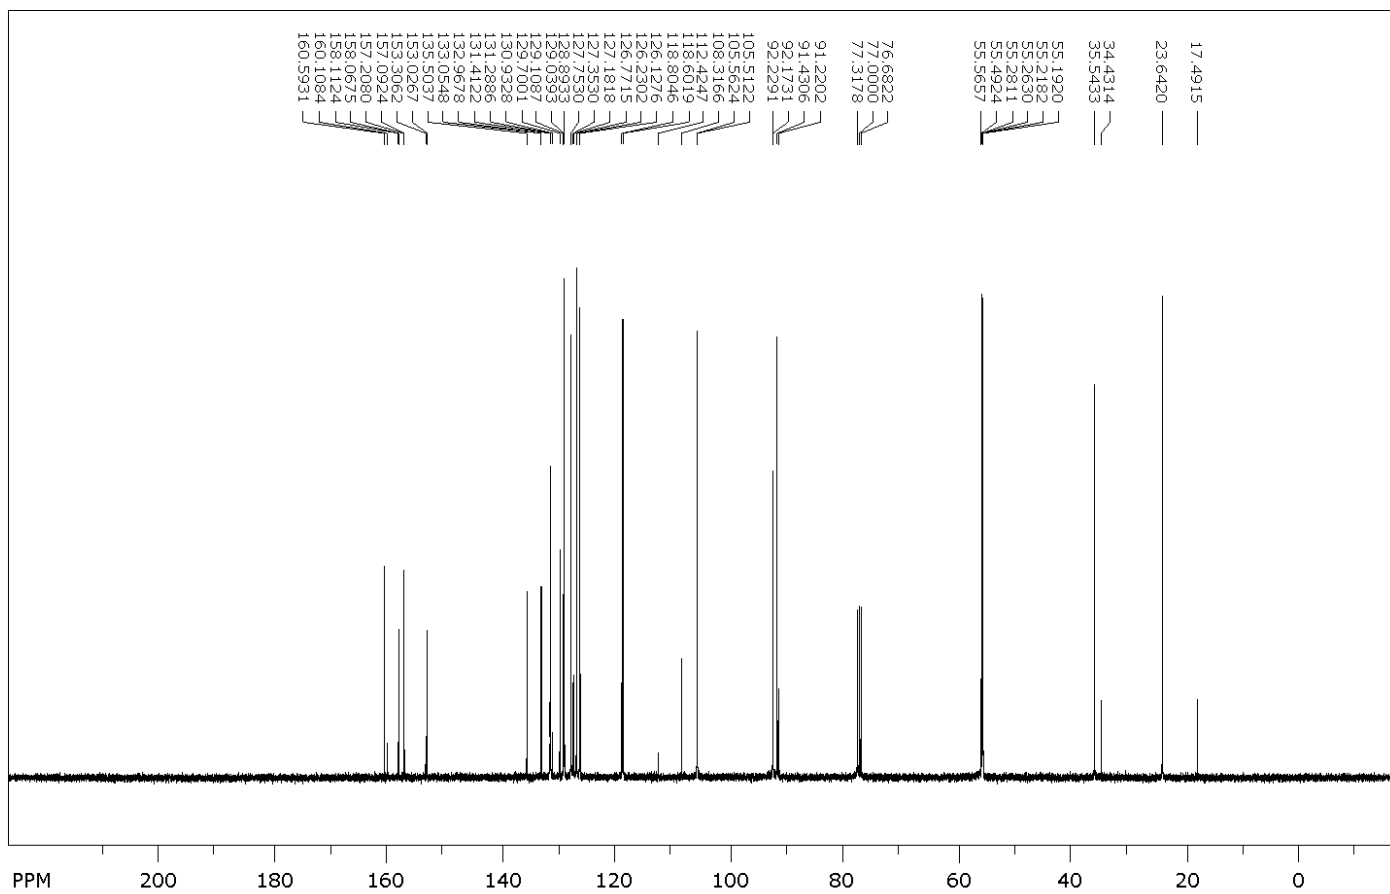

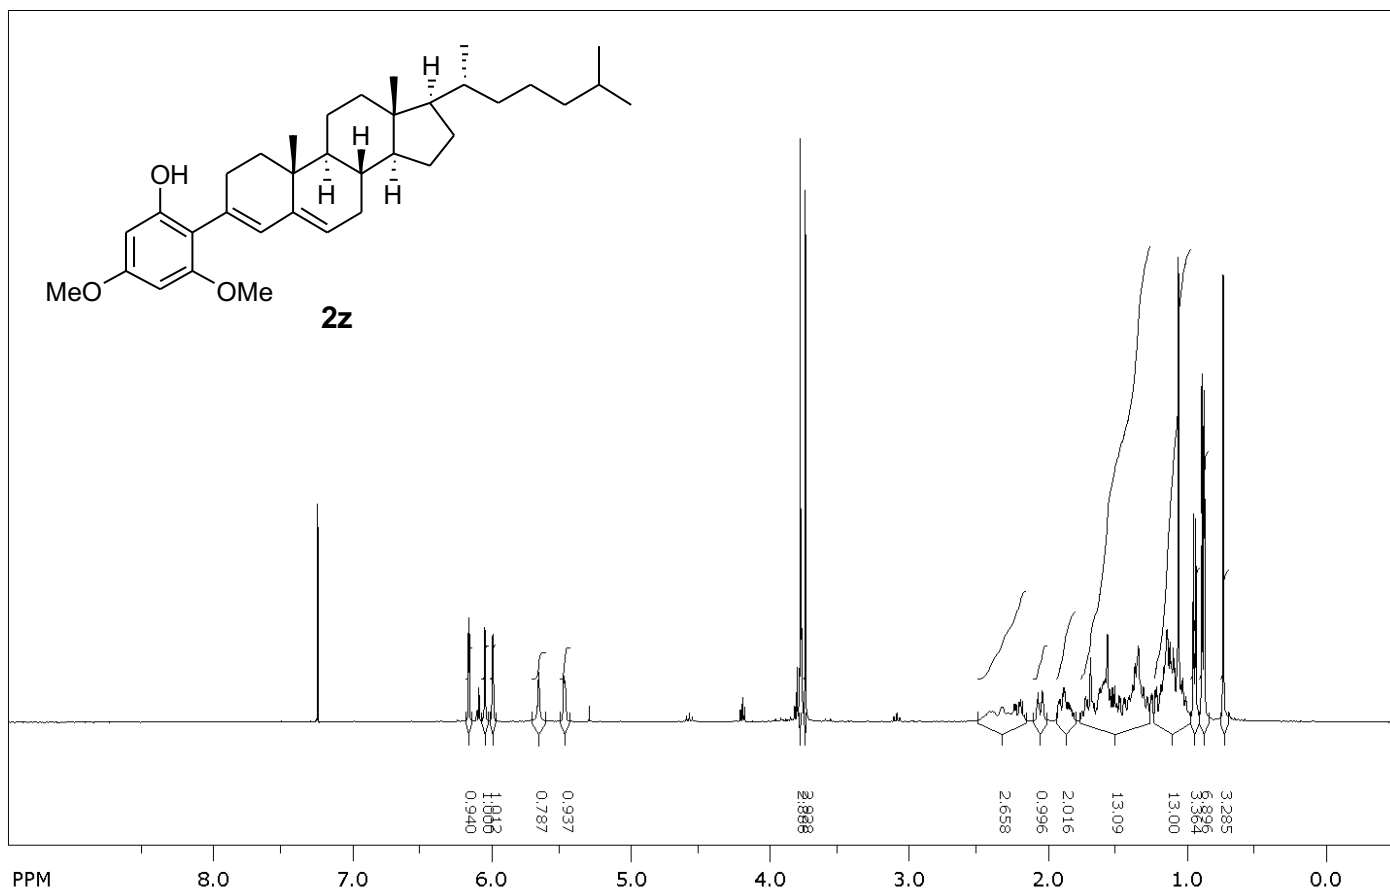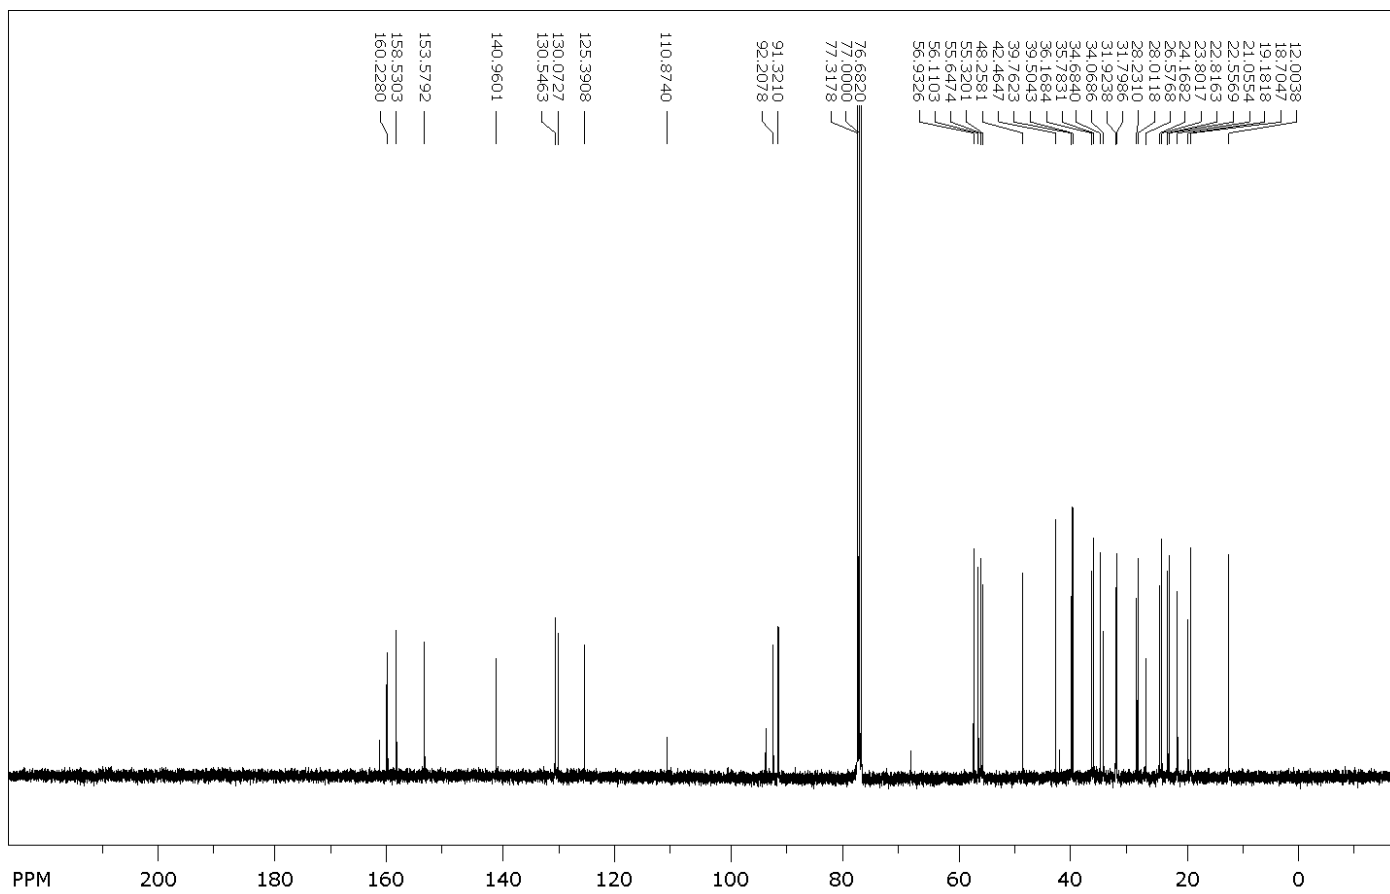

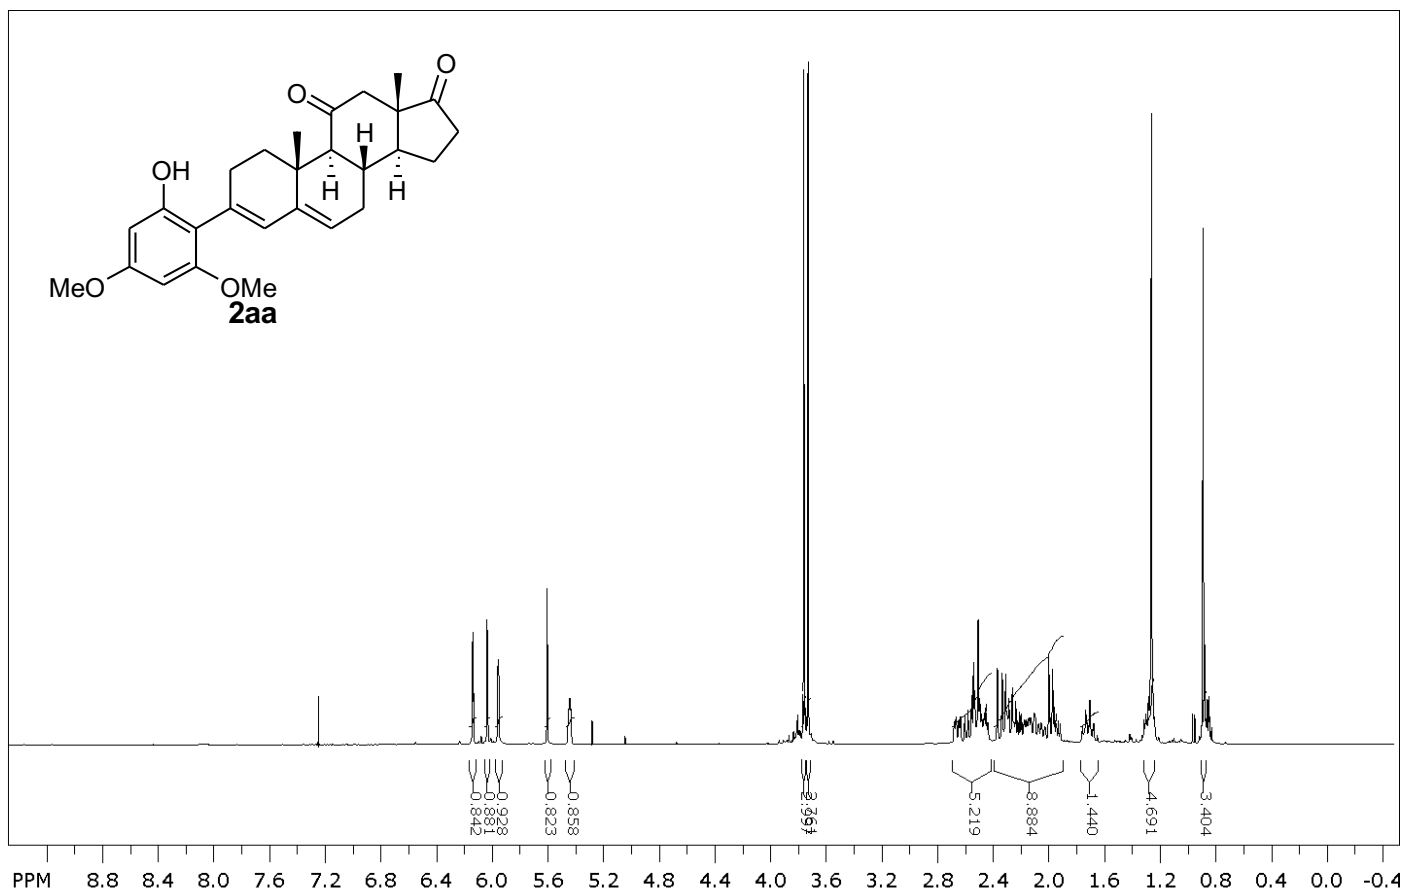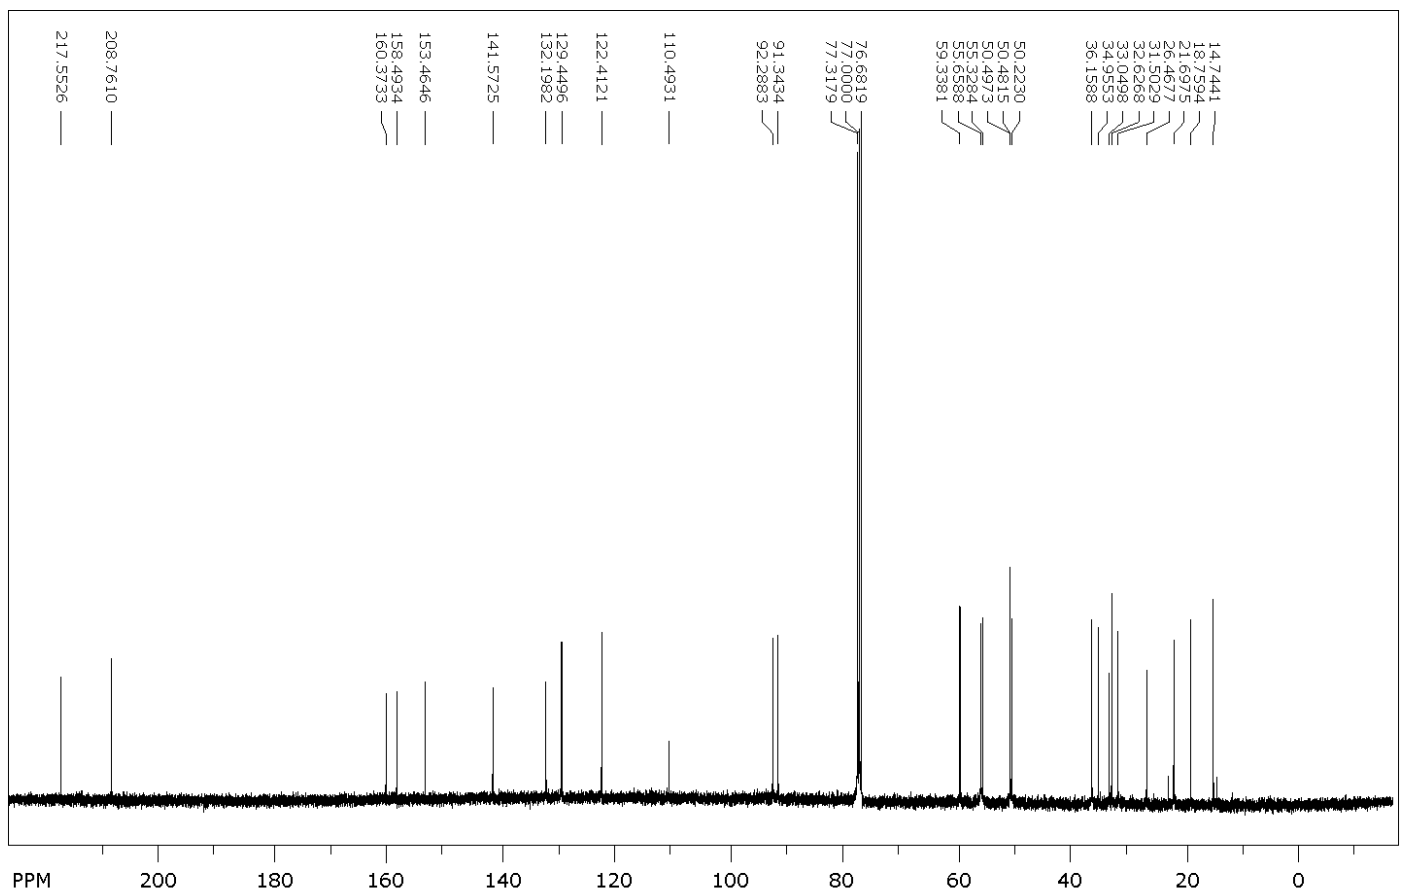

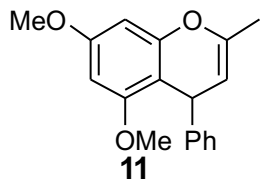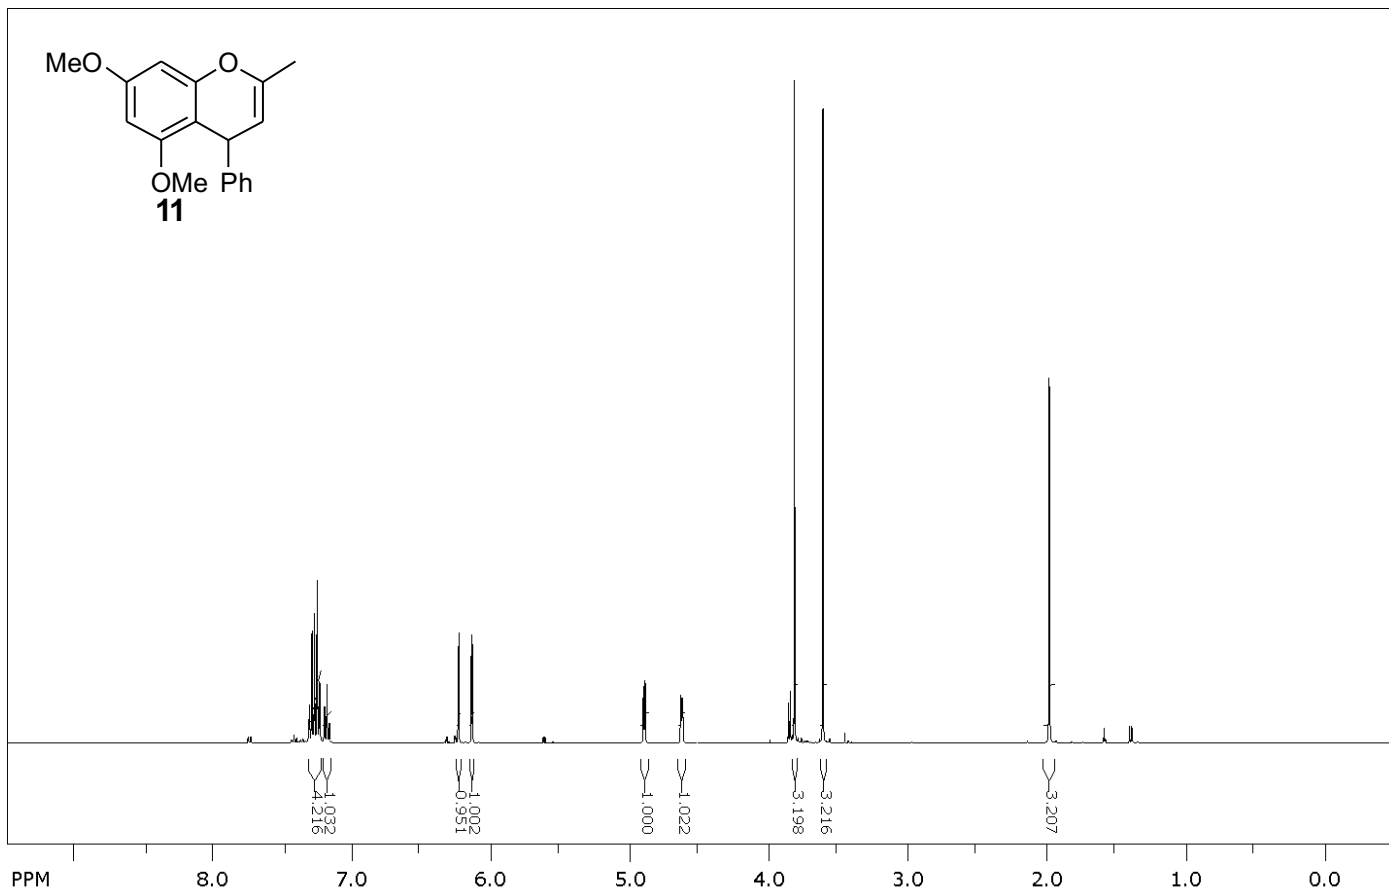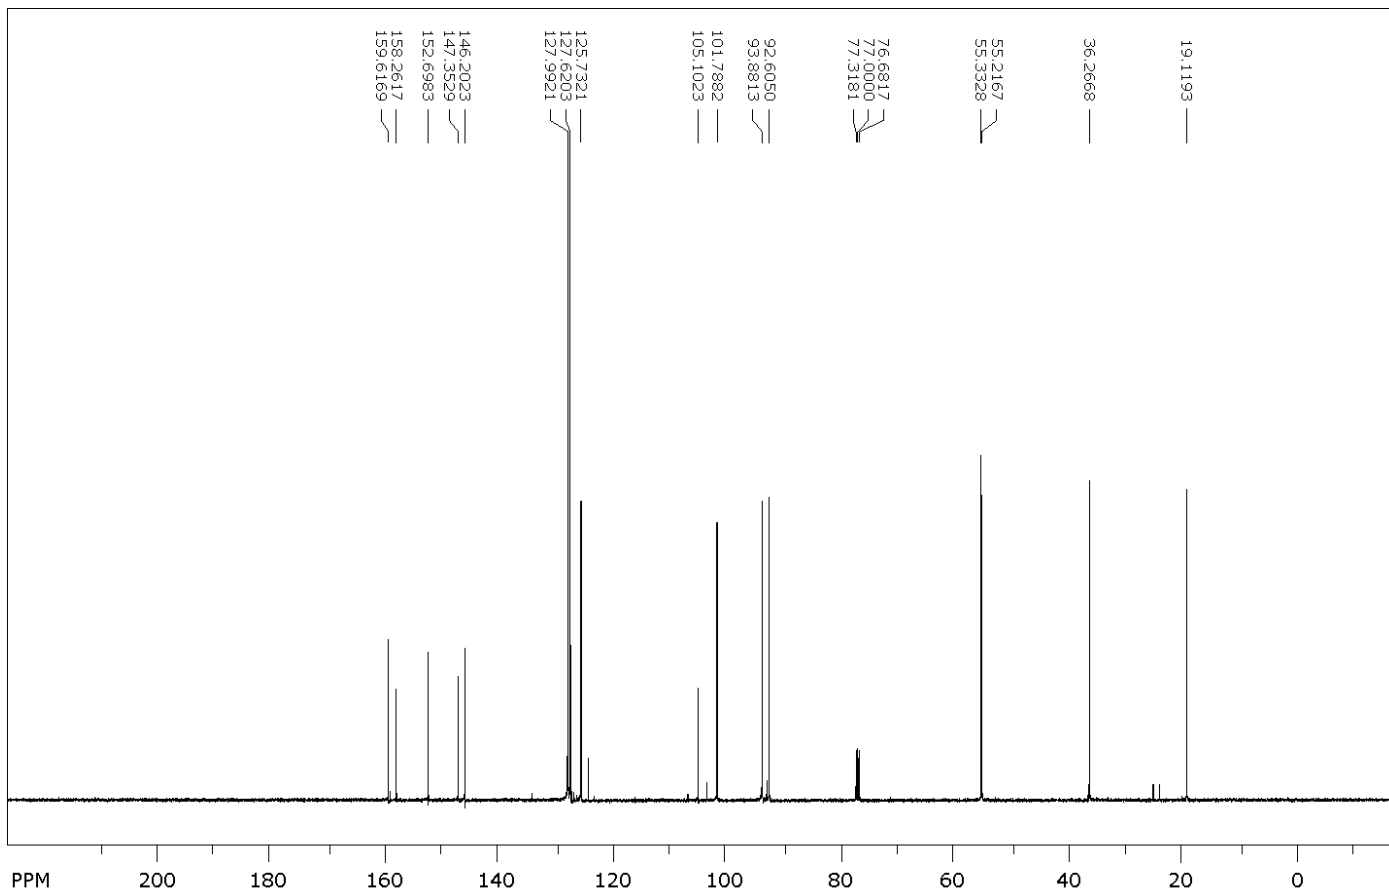



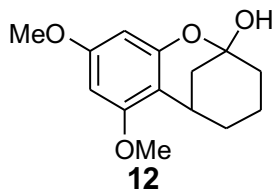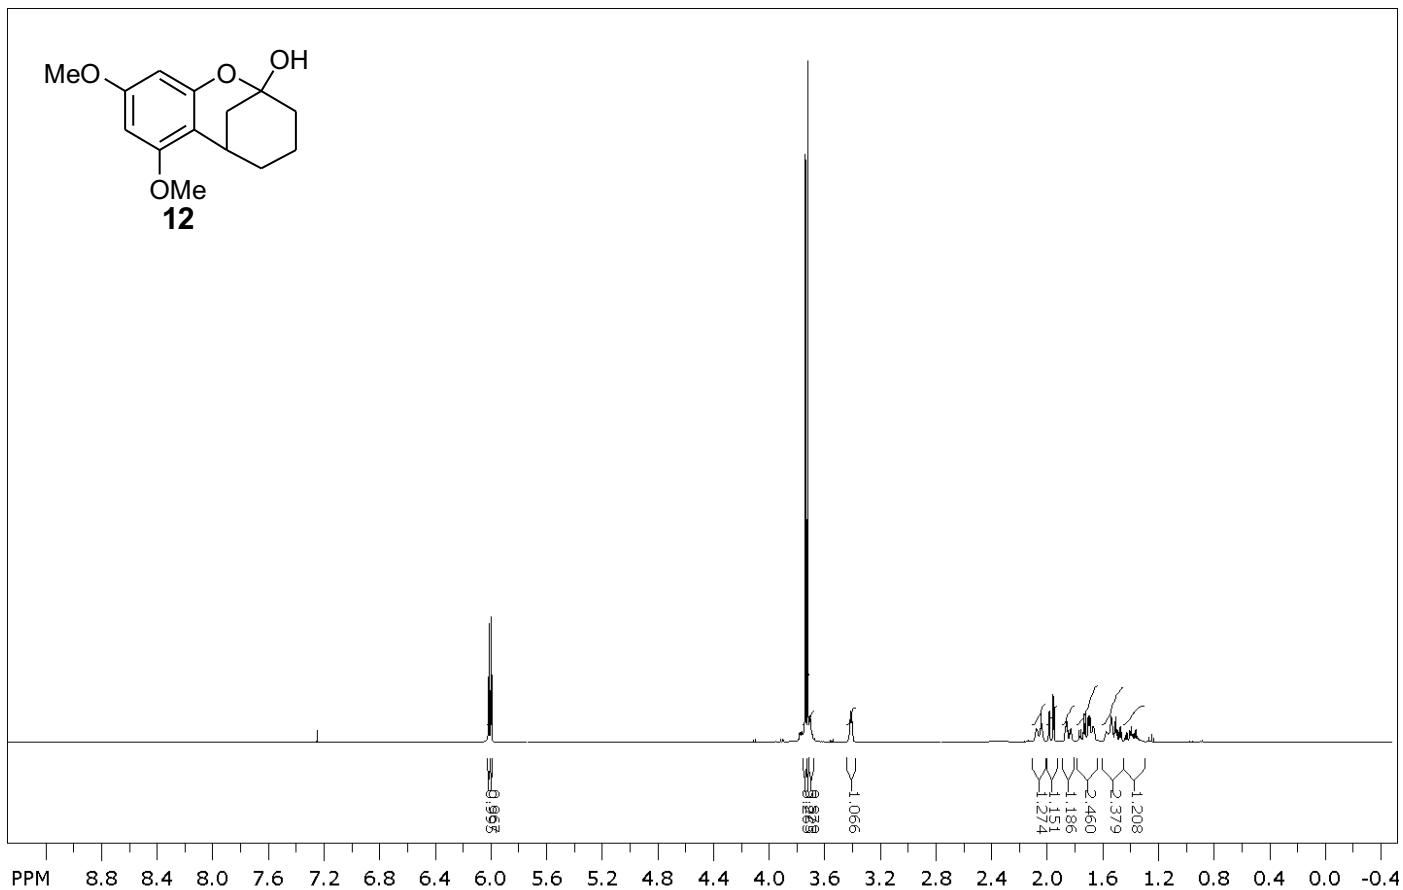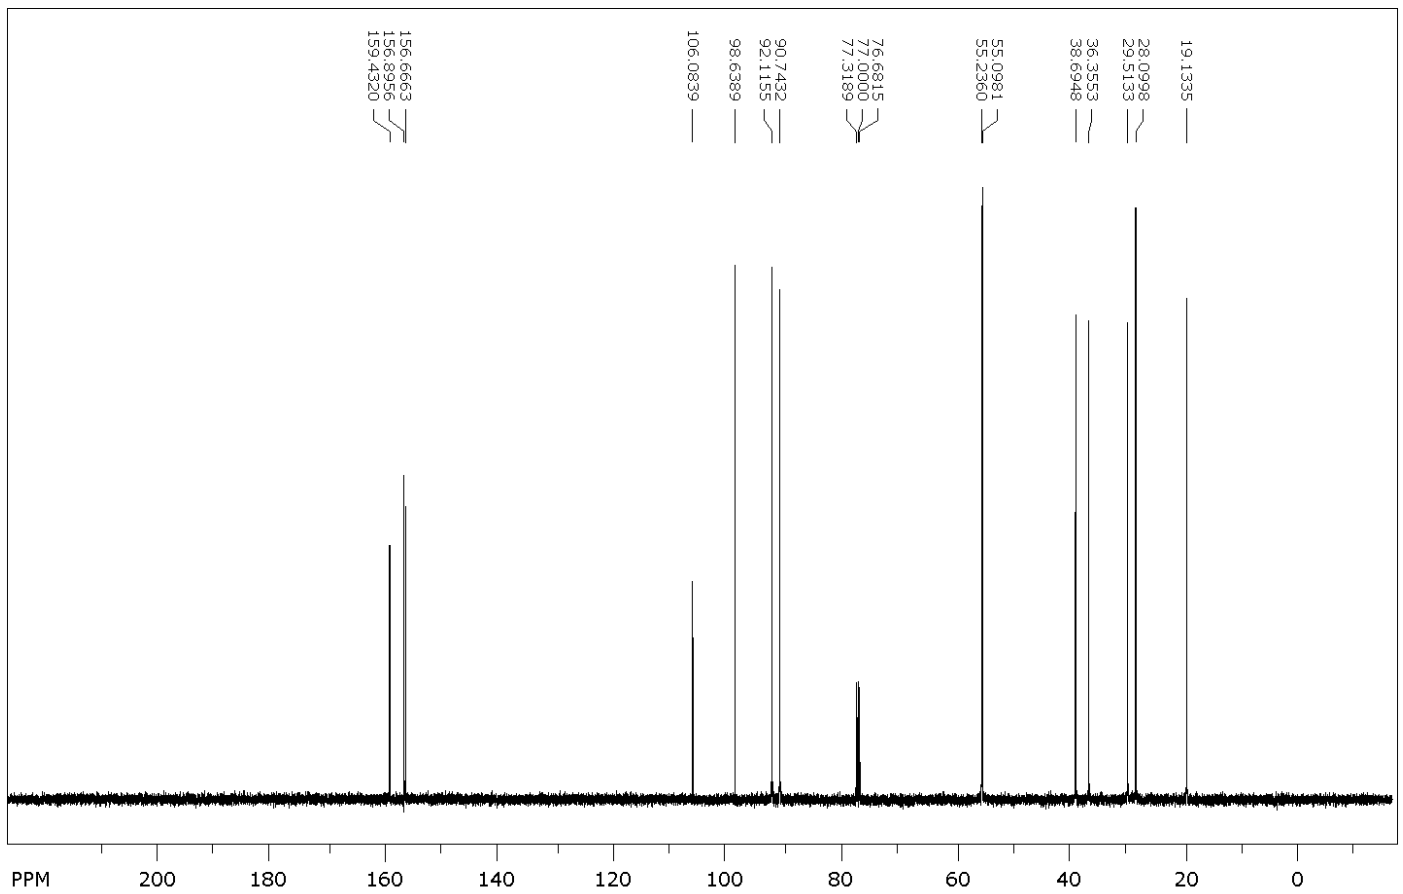

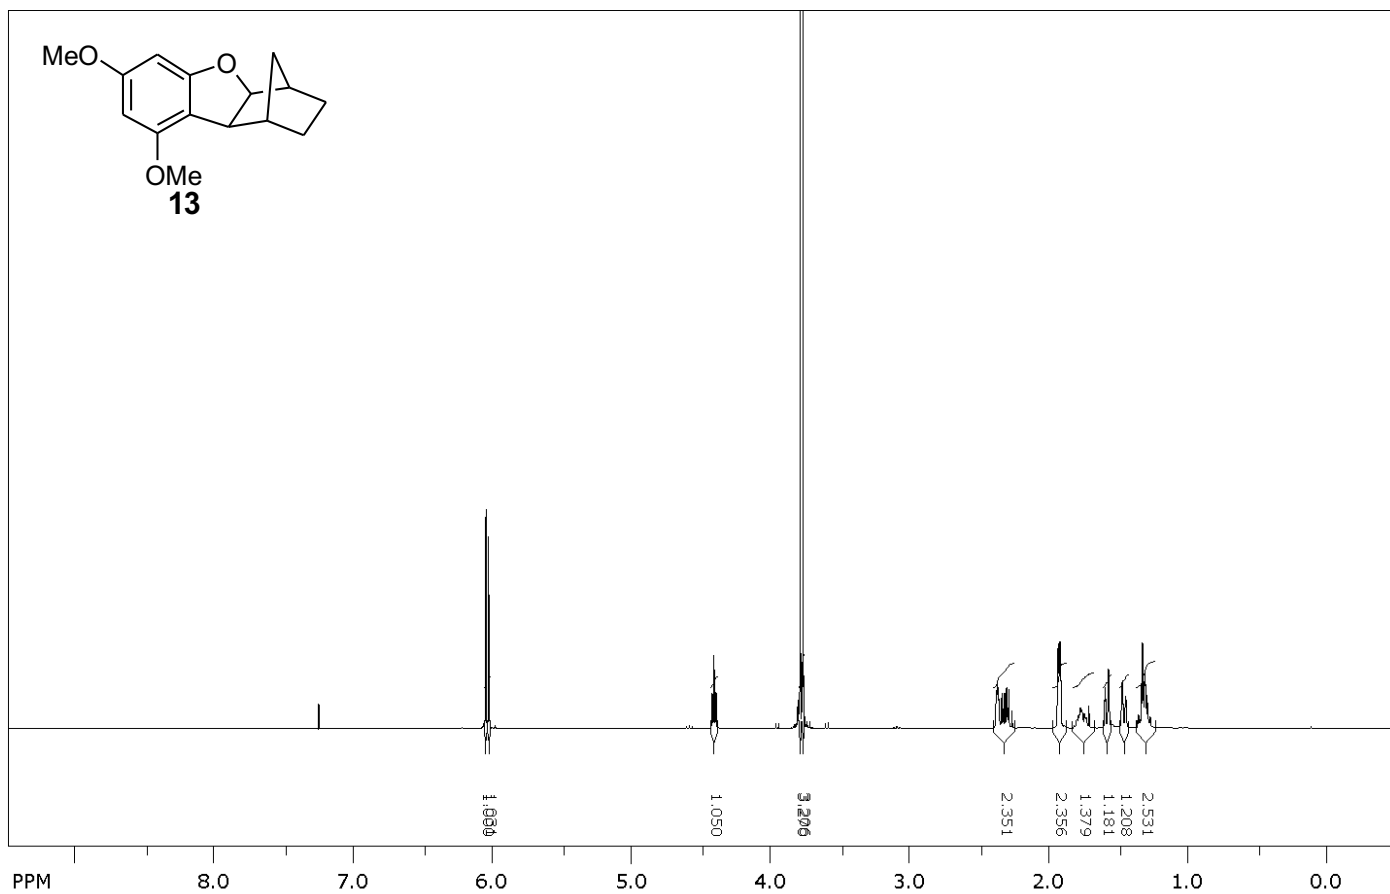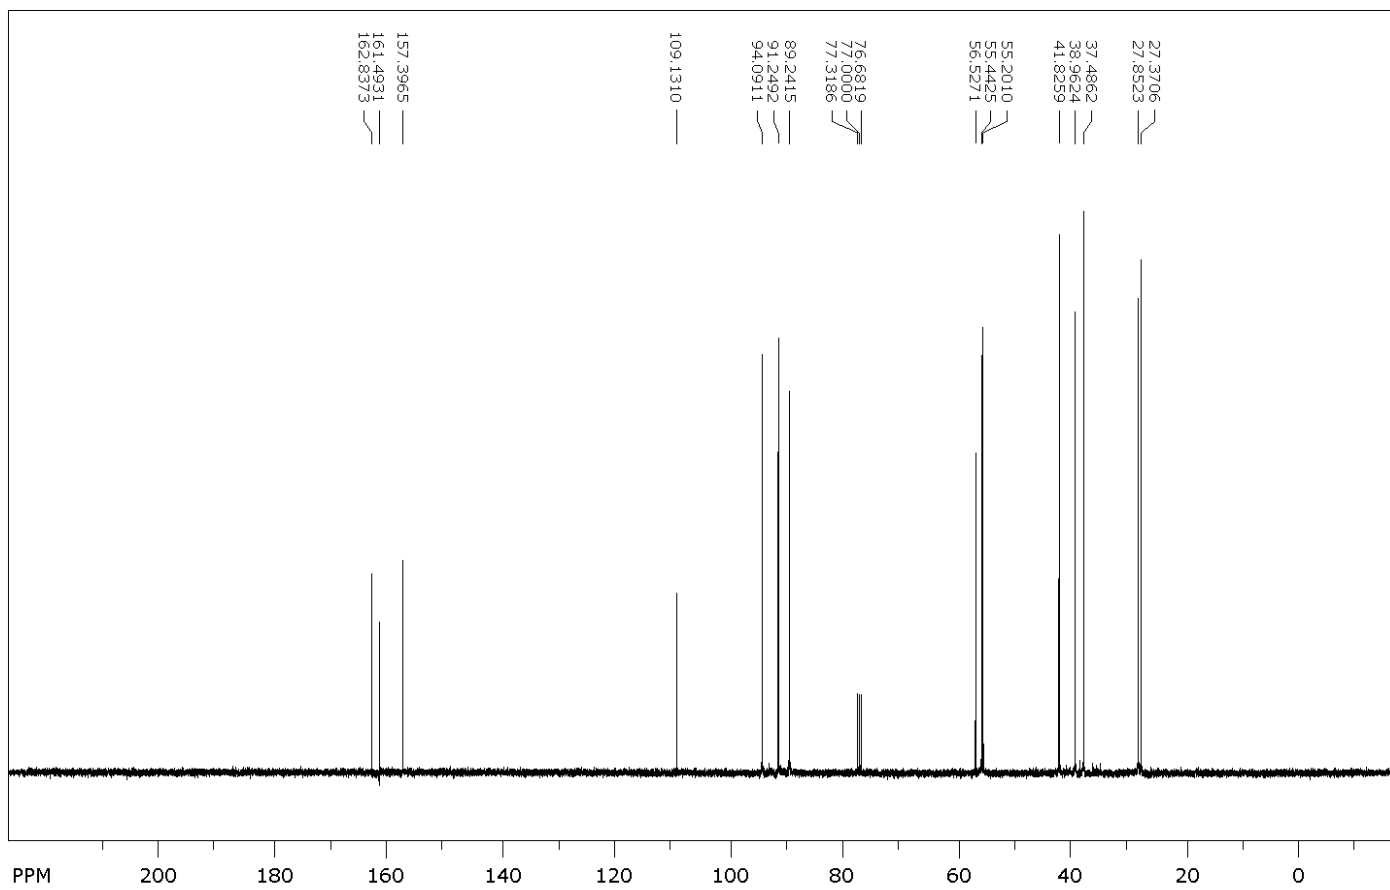

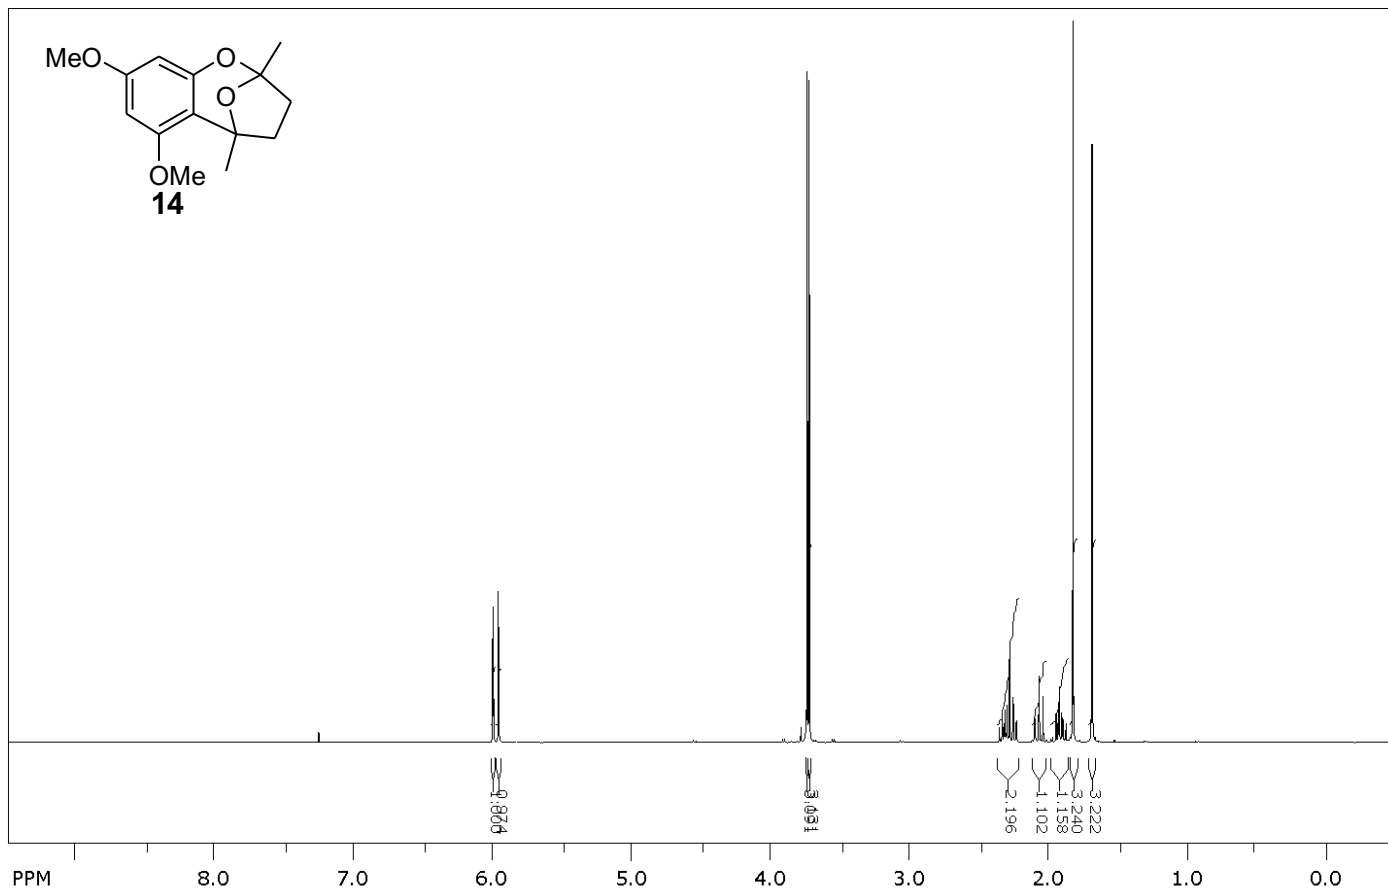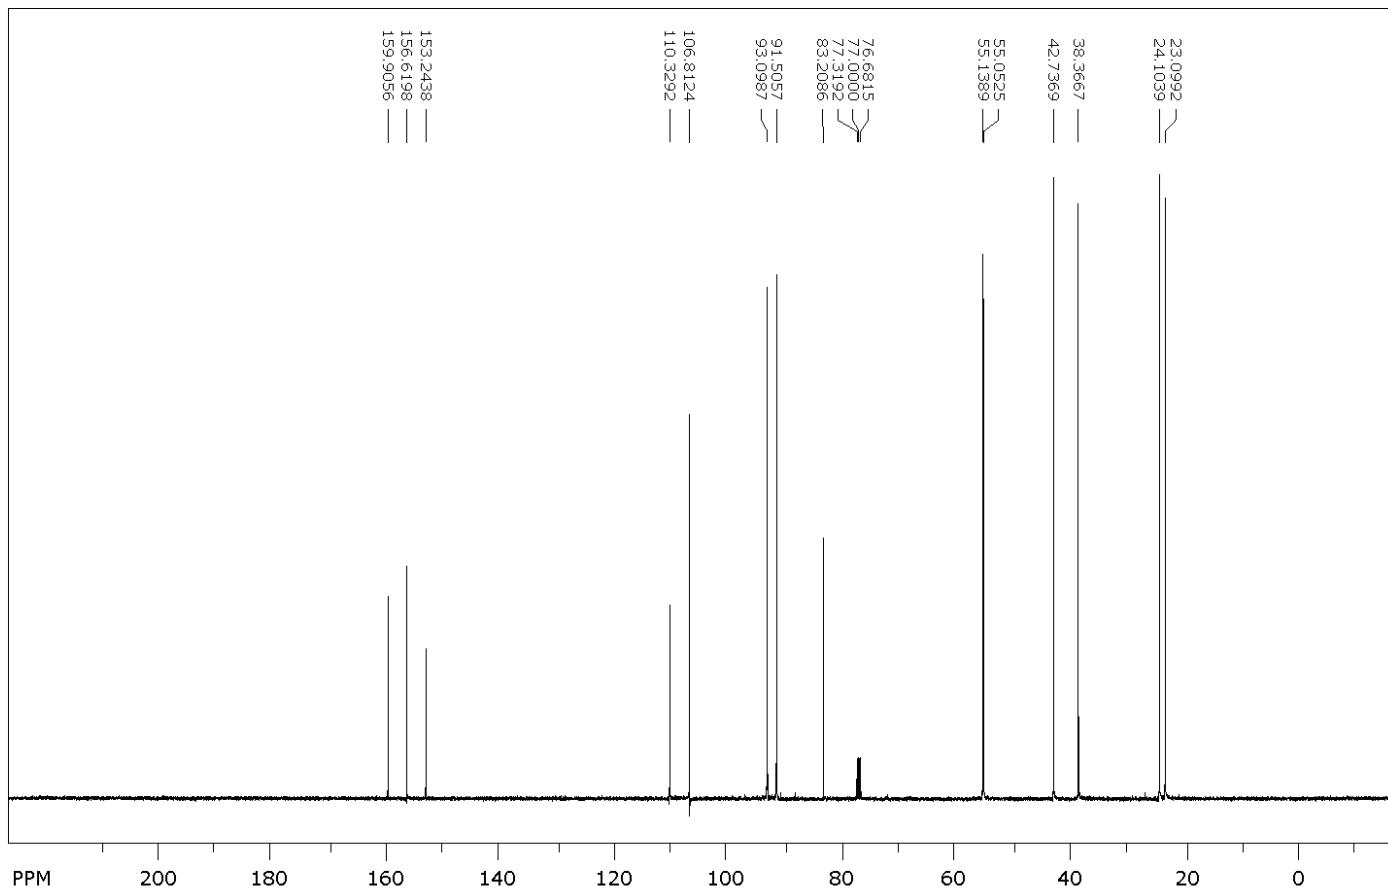

Supplement: NIHMS1032724-supplement-SI.pdf [file NIHMS1032724-supplement-SI.pdf]
